# Supplementary material for: Identifying high-impact variants and genes in exomes of Ashkenazi Jewish inflammatory bowel disease patients
Source: Nat Commun. 2023 Apr 20;14:2256. doi: 10.1038/s41467-023-37849-3 (PMC10119186; doi:10.1038/s41467-023-37849-3)
Supplement: Supplementary file 4 — Supplementary Data 1-18 [file 41467_2023_37849_MOESM4_ESM.xlsx]

## Sheet: Supplementary Table 1
Supplementary Table 1. IBD-associated genes from SKAT-O analysis on AJ IBD cohort using high impact rare variants
SetID	P.value	N.Marker.All	N.Marker.Test	MAC	m	Method.bin	MAP
NOD2	3.03e-09	29	26	288	276	QA	-1
MARCH7	7.02e-05	4	3	28	28	QA	-1
WDR60	0.00019206	11	9	233	231	QA	-1
OR6C6	0.000246036	4	4	81	81	QA	-1
LRRK2	0.00025312	30	28	249	249	QA	-1
EDRF1	0.000267203	10	10	133	132	QA	-1
INPP5D	0.000281583	5	5	43	43	QA	-1
RNF39	0.000339496	1	1	6	6	ER	0.000339496
ZNF329	0.00034473	4	4	133	130	QA	-1
CLPX	0.000379121	6	5	39	37	ER.A	-1
GJD2	0.000397384	6	5	7	7	ER	6.17e-05
OR6C76	0.000490032	2	2	81	81	QA	-1
ZNF556	0.000506843	3	3	9	9	ER	4.17e-05
DPH2	0.000563983	6	4	44	44	QA	-1
RLF	0.000607532	8	7	65	65	QA	-1
SPAG5	0.000635562	9	9	36	36	ER.A	-1
RP4-576H24.4	0.00080514	3	3	17	17	ER	1.39e-08
ERICH1	0.000853665	1	1	25	25	QA	-1
EHMT1	0.000889966	8	8	65	65	QA	-1
ZNF597	0.0009318	2	2	39	39	ER.A	-1
ATP6V0D2	0.000937982	8	7	53	53	QA	-1
HHLA2	0.000951903	2	2	78	78	QA	-1
NMS	0.00118104	2	2	89	88	QA	-1
NECAP1	0.00123155	4	4	7	7	ER	0.000322526
CCT7	0.00127382	3	3	6	6	ER	0.00127382
SH2D5	0.00128182	4	4	103	102	QA	-1
MCOLN2	0.00128788	3	3	19	19	ER	8.03e-09
CST4	0.00129951	2	2	47	47	QA	-1
TOE1	0.00132669	3	3	13	13	ER	5.71e-07
DLG4	0.00134009	3	3	65	64	QA	-1
PEX13	0.0013721	2	2	33	33	ER.A	-1
MYNN	0.00137918	2	2	8	8	ER	0.000394833
ZFAND4	0.00145691	9	9	65	65	QA	-1
PLTP	0.00160239	9	8	106	103	QA	-1
SSH1	0.00161687	8	7	14	14	ER	1.12e-06
DARS2	0.00180472	4	2	28	28	QA	-1
ASIC5	0.00180645	5	3	48	47	QA	-1
HAUS2	0.00209589	2	2	54	54	QA	-1
CLRN3	0.00213086	3	3	11	11	ER	3.07e-06
NTSR1	0.00232589	10	10	158	139	QA	-1
EVPLL	0.00234549	2	2	21	21	ER.A	-1
MED13	0.00245936	10	10	62	62	QA	-1
RAD54L	0.00250573	7	7	30	30	ER.A	-1
PTCHD4	0.00254492	2	2	5	5	ER	0.00254492
CCDC15	0.00259342	3	3	35	35	QA	-1
SLC45A4	0.00272209	10	10	21	21	ER.A	-1
EPHX2	0.00278584	15	14	117	112	QA	-1
ICAM1	0.00294423	6	6	128	128	QA	-1
ZNF695	0.0029863	8	7	62	62	QA	-1
NUMA1	0.00303851	24	22	94	71	QA	-1
CLIP3	0.00309895	3	3	6	6	ER	0.00309895
TFCP2	0.00311599	3	3	4	4	ER	0.00311599
PPP1R3D	0.00341691	1	1	13	13	ER	8.46e-07
C14orf166B	0.00344611	7	7	103	102	QA	-1
OR10J5	0.00347433	5	4	16	16	ER	4.68e-08
PCOLCE2	0.00347648	7	7	76	76	QA	-1
ITK	0.00359104	4	4	60	60	QA	-1
IRX1	0.00369751	2	2	7	7	ER	0.00020515
MIER1	0.00370176	3	3	21	21	ER.A	-1
ERO1LB	0.00378119	2	2	23	23	ER.A	-1
ADORA1	0.00420344	1	1	16	16	ER	3e-08
GPD2	0.00451486	6	5	12	12	ER	9.96e-07
C2orf70	0.00471398	3	3	4	4	ER	0.00471398
IGSF3	0.00473175	8	8	85	85	QA	-1
TLR4	0.00479452	5	4	26	26	ER.A	-1
RAB32	0.00484521	2	2	34	34	ER.A	-1
RRS1	0.00487192	3	3	26	26	ER.A	-1
GK2	0.00499033	9	9	51	51	QA	-1
ZNF552	0.00502916	3	3	37	37	ER.A	-1
PDGFD	0.00504702	5	5	65	64	QA	-1
C2orf16	0.00514506	12	12	140	135	QA	-1
INTS7	0.00515033	4	3	8	8	ER	1.41e-05
OGFOD1	0.00523261	3	3	14	14	ER	1.51e-07
NANOS2	0.00528159	5	5	6	6	ER	0.000457023
LAMP3	0.00532542	4	4	9	9	ER	1.41e-05
ZNF785	0.00555766	5	5	41	41	QA	-1
RGS1	0.0056622	2	2	13	13	ER	4.3e-07
NR2C1	0.00573561	7	7	135	135	QA	-1
C10orf91	0.00586119	3	2	18	18	ER	3.2e-08
P4HTM	0.00608705	4	3	11	11	ER	3.63e-06
SUSD1	0.00658383	14	12	59	59	QA	-1
TUT1	0.00666677	5	4	22	22	ER.A	-1
PRSS36	0.00680838	7	6	34	34	ER.A	-1
KIF25	0.00687366	1	1	6	6	ER	0.000426714
SUSD5	0.00698805	9	7	80	80	QA	-1
SPHKAP	0.00716389	8	7	63	63	QA	-1
EGR2	0.00719692	3	3	42	42	QA	-1
PLSCR2	0.00724379	4	4	54	54	QA	-1
SLC35F1	0.00724907	3	3	26	26	ER.A	-1
SCFD2	0.00732273	9	9	41	41	QA	-1
FRMPD1	0.00742727	18	16	204	200	QA	-1
SRRD	0.00772178	4	1	25	25	ER.A	-1
ANKRD6	0.0077735	4	2	18	18	ER	3.3e-09
USP37	0.00792611	5	4	135	134	QA	-1
KIAA1468	0.0079596	5	5	10	10	ER	3.56e-05
GALNT8	0.00806429	10	10	64	63	QA	-1
VDR	0.00807591	4	3	52	52	QA	-1
GGNBP2	0.00808482	3	2	12	12	ER	1.33e-06
FCHO2	0.00811028	2	1	12	12	ER	3.98e-07
HSD17B8	0.00821848	1	1	4	4	ER	0.00821848
VCPKMT	0.00825267	2	1	4	4	ER	0.00825267
THAP3	0.00827053	3	3	36	36	ER.A	-1
ANP32B	0.00850088	3	3	6	6	ER	0.00102064
LRRC56	0.00870343	6	5	114	114	QA	-1
DAGLA	0.00871921	5	5	15	15	ER	6.39e-07
KCNIP3	0.00877087	3	2	4	4	ER	0.00877087
RPUSD1	0.00878798	4	4	5	5	ER	0.00284096
MRPL16	0.00879111	3	3	44	44	QA	-1
NOL6	0.00883484	17	17	117	116	QA	-1
GSS	0.00892105	6	5	85	85	QA	-1
C6orf58	0.00899673	4	3	121	121	QA	-1
GET4	0.0091187	4	4	19	19	ER	4.08e-09
TELO2	0.00912799	9	9	23	23	ER.A	-1
PLEKHA6	0.00917572	11	11	83	80	QA	-1
ZMIZ1	0.00925285	6	6	42	42	QA	-1
KTI12	0.00929031	4	4	26	26	ER.A	-1
CHD9	0.00930339	9	8	43	43	QA	-1
DPP10	0.00932276	2	1	25	24	ER.A	-1
OPTC	0.00942701	4	4	24	24	ER.A	-1
IL33	0.00949231	2	2	14	14	ER	3.38e-06
C9orf9	0.00957895	3	3	22	22	ER.A	-1
LBX2	0.0095876	2	2	51	51	QA	-1
MFI2	0.0096172	6	6	7	7	ER	2.92e-05
LBR	0.00969801	4	4	23	23	ER.A	-1
ANXA6	0.00978255	8	8	52	52	QA	-1
CDKAL1	0.00984222	6	5	27	27	ER.A	-1
DAB1	0.0098855	5	5	10	10	ER	2.68e-05
FARP2	0.010453	15	14	137	137	QA	-1
SPTLC1	0.0105624	2	2	3	3	ER	0.0105624
ADAT1	0.0105884	6	5	21	21	ER.A	-1
MAPK4	0.0106123	8	8	94	91	QA	-1
EVI5	0.0107415	7	6	147	147	QA	-1
SAR1B	0.0109648	2	2	5	5	ER	0.00178804
CAPZA1	0.0109686	1	1	44	44	QA	-1
HARS2	0.0109994	4	4	6	6	ER	0.00490245
PSMD3	0.0110568	6	6	47	47	QA	-1
LYPD4	0.0110967	3	2	6	6	ER	0.00280246
CDH7	0.0110967	4	3	5	5	ER	0.00331501
ABCB1	0.0111442	14	13	128	127	QA	-1
PANK2	0.0114728	7	7	33	33	ER.A	-1
LOXL2	0.0116213	11	10	41	41	QA	-1
POLR1E	0.0116624	8	7	162	162	QA	-1
VWA3A	0.0116647	14	13	97	96	QA	-1
HOXB1	0.0117034	2	2	3	3	ER	0.0117034
SRPK1	0.0117609	2	2	17	17	ER	1.23e-08
R3HDM2	0.011847	2	2	35	35	ER.A	-1
UBAP1	0.0119136	3	3	10	10	ER	5.48e-06
RRNAD1	0.0119942	5	4	9	9	ER	2.87e-05
SLFN11	0.0120256	6	5	33	33	ER.A	-1
MAST1	0.0122345	6	5	45	45	QA	-1
OR9Q2	0.0122526	6	5	59	59	QA	-1
CLN5	0.0123823	2	2	4	4	ER	0.0123823
CSMD1	0.0124136	40	36	381	347	QA	-1
AEN	0.0125386	5	5	85	85	QA	-1
OR6X1	0.0125783	4	4	97	96	QA	-1
PCDHB14	0.0125826	2	2	90	90	QA	-1
COQ2	0.0127336	2	2	15	15	ER	5.41e-07
C4orf29	0.0127477	5	5	57	57	QA	-1
TRIB3	0.0129693	8	6	31	30	ER.A	-1
AK5	0.0130743	1	1	32	31	ER.A	-1
FSCN1	0.0130946	5	4	24	24	ER.A	-1
RASGRF2	0.01312	8	7	44	44	QA	-1
B3GALT4	0.0132833	3	3	3	3	ER	0.0132833
MICALL1	0.0133441	5	5	12	12	ER	3.44e-05
KIR3DX1	0.0133623	4	3	15	15	ER	3.55e-08
TLE6	0.0134168	7	6	40	39	ER.A	-1
EAF1	0.0134969	3	2	101	100	QA	-1
PCDHB11	0.0136058	5	5	21	21	ER.A	-1
NOTCH2	0.0136875	12	11	79	79	QA	-1
SUGP2	0.0137917	7	6	29	29	ER.A	-1
RAG2	0.0138148	7	5	15	15	ER	9.55e-09
SLC38A4	0.0138358	5	5	72	72	QA	-1
APOA5	0.0138467	6	5	86	86	QA	-1
BTBD9	0.0138692	6	6	68	68	QA	-1
RGS9	0.0140813	3	3	20	20	ER	2.81e-09
A1CF	0.0141301	3	3	7	7	ER	0.000667685
SDCCAG8	0.0143148	4	3	3	3	ER	0.0143148
FOS	0.0143469	2	2	4	4	ER	0.0143469
AJAP1	0.0147064	4	3	23	23	ER.A	-1
SPG7	0.0147641	6	4	34	34	ER.A	-1
SAMD9L	0.0151874	12	11	88	88	QA	-1
PCM1	0.0157124	12	9	51	51	QA	-1
TBC1D19	0.0158746	2	2	41	41	QA	-1
C21orf91	0.0159323	2	2	3	3	ER	0.0159323
CDH10	0.0159749	3	3	18	18	ER	3e-10
CAPN1	0.0160374	7	5	27	27	ER.A	-1
ATAD3C	0.0160795	9	8	75	75	QA	-1
CWC22	0.0162429	7	7	65	65	QA	-1
CBS	0.016256	5	4	74	72	QA	-1
TRPV4	0.0163214	11	9	37	37	ER.A	-1
SLC39A3	0.0164199	2	2	10	10	ER	1.81e-05
IKZF3	0.0165765	3	3	16	16	ER	2.42e-09
MTMR7	0.0166204	8	6	26	26	ER.A	-1
STAG3	0.0166339	4	3	33	33	ER.A	-1
DIEXF	0.0167267	5	5	18	18	ER	2.66e-09
SLC11A2	0.0167413	1	1	6	6	ER	0.00243434
ARID4B	0.0168464	11	11	83	83	QA	-1
CMIP	0.0171703	4	3	5	5	ER	0.00574626
LIFR	0.0173833	6	6	6	6	ER	0.000367847
FH	0.0178792	2	2	3	3	ER	0.0178792
LNX1	0.0179545	12	9	21	21	ER.A	-1
LAP3	0.0179687	7	7	102	100	QA	-1
MAMSTR	0.0180108	2	2	41	41	QA	-1
NCAPG2	0.0180334	5	5	51	51	QA	-1
EVC2	0.0180777	22	19	160	143	QA	-1
PATE1	0.01821	1	1	11	11	ER	1.4e-05
LYRM1	0.018268	3	2	3	3	ER	0.018268
TRMT61A	0.0184009	1	1	2	2	ER	0.0184009
CCDC80	0.0184666	6	6	34	34	ER.A	-1
PARD6B	0.018502	3	3	61	61	QA	-1
SBNO2	0.018582	4	4	6	6	ER	0.00122751
ERGIC1	0.0186203	3	3	65	65	QA	-1
AGMAT	0.0187998	7	6	56	56	QA	-1
P2RY14	0.0188153	2	2	14	14	ER	1.18e-06
UBE2O	0.0189129	7	7	24	24	ER.A	-1
RSF1	0.0189418	7	5	30	30	ER.A	-1
CEBPD	0.0192164	4	3	5	5	ER	0.00314623
NOXRED1	0.0192689	3	2	4	4	ER	0.0192689
HERC2	0.0193969	21	17	129	128	QA	-1
JAK2	0.0194553	6	5	35	35	ER.A	-1
HIRA	0.0194935	6	6	70	70	QA	-1
CCDC9	0.0195192	6	6	8	6	ER	0.000190456
OOSP2	0.0196887	1	1	46	46	QA	-1
CHRNE	0.0197869	6	5	104	103	QA	-1
SLC22A8	0.0200072	5	5	108	108	QA	-1
RIPK4	0.0200466	2	1	11	11	ER	3.19e-05
LRRC8C	0.0200997	3	3	3	3	ER	0.0200997
NUP210L	0.0201173	8	8	80	79	QA	-1
PTK6	0.0202072	9	9	22	22	ER.A	-1
ZNF441	0.0202337	3	3	88	87	QA	-1
ITGAV	0.0202653	10	9	29	29	ER.A	-1
PDE4C	0.0203127	4	4	21	21	ER.A	-1
TRIP4	0.0203866	5	4	11	11	ER	5.85e-06
DNAJC13	0.0205513	18	15	139	137	QA	-1
OLFM4	0.0205888	4	3	4	4	ER	0.00676691
TMEM161B	0.0207006	2	2	6	6	ER	0.00209882
RPTN	0.0208875	5	4	6	6	ER	0.0037723
CD163	0.0209305	8	6	59	59	QA	-1
FAP	0.0210156	4	4	71	71	QA	-1
TEKT1	0.02103	7	7	13	13	ER	3.26e-06
CLEC3A	0.0210589	2	2	7	7	ER	0.00203102
IKBKE	0.0211537	5	5	63	63	QA	-1
TMEM147	0.0211861	3	3	3	3	ER	0.0211861
PPOX	0.0213259	1	1	9	9	ER	5.15e-05
ACYP1	0.0213998	1	1	40	40	ER.A	-1
PRF1	0.0214352	10	8	63	63	QA	-1
FAM151A	0.0214544	10	10	160	160	QA	-1
FAM8A1	0.0216379	1	1	7	7	ER	0.000841582
WDR41	0.0217205	1	1	12	12	ER	1.79e-06
KRTAP4-12	0.0217391	1	1	19	19	ER	4.26e-08
SCRIB	0.0217975	11	10	21	21	ER.A	-1
STAC3	0.0218141	3	3	18	18	ER	3.09e-09
PMS1	0.0218897	3	3	84	84	QA	-1
GHITM	0.0219035	4	4	6	6	ER	0.000752949
C2orf80	0.0220089	2	1	9	9	ER	1.6e-05
GOT1	0.0220586	6	4	60	59	QA	-1
ACVR1C	0.0221916	4	4	33	33	ER.A	-1
CHD2	0.0222365	2	2	13	13	ER	1.1e-06
NCOA7	0.0222655	6	6	40	39	ER.A	-1
IQGAP2	0.0222777	20	19	147	146	QA	-1
ABRA	0.0222856	5	3	49	48	QA	-1
FLCN	0.0223254	6	5	13	13	ER	9.05e-08
TRPV2	0.0224798	7	6	20	20	ER	3.26e-10
RFWD3	0.0225939	5	4	120	118	QA	-1
B4GALT1	0.0226635	4	4	23	23	ER.A	-1
SAMD3	0.0227063	10	10	95	94	QA	-1
INO80	0.0227823	6	5	26	26	ER.A	-1
SIDT1	0.0229478	8	7	180	176	QA	-1
MEOX2	0.0229857	1	1	3	3	ER	0.0229857
CAMK2B	0.0230265	3	2	5	5	ER	0.00130057
NDUFV3	0.0231482	1	1	3	3	ER	0.0231482
PLA2R1	0.0232766	12	10	70	70	QA	-1
DNMT3B	0.0233181	5	4	91	91	QA	-1
SKA1	0.0236506	1	1	9	9	ER	1.97e-05
ARHGAP39	0.0236593	4	4	16	16	ER	5.45e-08
BOK	0.023681	1	1	9	9	ER	0.000167778
CYTH2	0.0237426	3	2	2	2	ER	0.0237426
NPNT	0.0237499	8	7	20	20	ER	4.21e-10
MLH1	0.0237841	10	10	90	88	QA	-1
SLC51B	0.0239065	1	1	6	6	ER	0.00210485
MYEOV2	0.0242271	2	1	3	3	ER	0.0242271
C10orf107	0.024346	2	2	2	2	ER	0.024346
MKNK1	0.0243857	8	8	62	62	QA	-1
CRYBA2	0.0244379	2	2	19	19	ER	5.3e-09
KIAA1377	0.0244545	8	7	61	61	QA	-1
TTLL7	0.0245213	6	5	27	27	ER.A	-1
UTP18	0.0245801	2	2	20	20	ER	1.32e-09
GSK3B	0.0246871	3	3	3	3	ER	0.0246871
ACSBG2	0.0247616	3	3	59	58	QA	-1
FBXO30	0.024892	7	6	23	23	ER.A	-1
SEC61B	0.0249321	1	1	45	45	QA	-1
FASTKD5	0.0252696	8	6	8	8	ER	0.000152115
CA13	0.0252843	5	3	9	9	ER	4.63e-05
RAPGEF2	0.0255069	9	9	87	86	QA	-1
NPY2R	0.0255293	3	3	3	3	ER	0.0255293
GALE	0.0255899	6	5	7	7	ER	0.000265558
ACCS	0.0256253	4	4	16	16	ER	3.45e-07
OR2J3	0.0259069	2	2	16	16	ER	2.65e-08
ZIK1	0.025961	4	4	54	54	QA	-1
UNC13C	0.0259664	20	19	163	162	QA	-1
GATAD2B	0.0260359	1	1	13	13	ER	6.63e-07
PTH2R	0.0261814	6	6	86	86	QA	-1
DLX3	0.0262042	1	1	2	2	ER	0.0262042
PARP12	0.0262118	4	2	7	7	ER	0.000257299
ZNF181	0.0263122	4	4	18	18	ER	2.6e-09
PLXNB2	0.0263369	13	12	43	43	QA	-1
C16orf78	0.026367	7	7	20	20	ER	1.79e-09
TM4SF1	0.0264196	3	3	5	5	ER	0.00611327
PHLDB3	0.0265407	6	6	20	20	ER	1.06e-10
CAPS2	0.026569	4	4	70	70	QA	-1
SORCS1	0.0265695	9	8	9	9	ER	4.1e-05
CRB1	0.0267129	23	22	202	202	QA	-1
ZNF726	0.0267709	1	1	17	17	ER	1.23e-07
NODAL	0.0268346	2	2	12	12	ER	5.73e-06
CYP3A4	0.0269158	13	12	56	56	QA	-1
FGF22	0.0269511	2	2	20	20	ER	4.17e-10
SYNGR2	0.0272102	1	1	5	5	ER	0.0020872
DBF4B	0.0272598	7	6	81	80	QA	-1
RGMA	0.0275821	1	1	3	3	ER	0.0275821
ATXN7	0.0275995	8	7	54	54	QA	-1
NSMCE4A	0.0279258	2	2	2	2	ER	0.0279258
FICD	0.0281055	4	4	4	4	ER	0.0281055
CASZ1	0.0283171	14	12	45	45	QA	-1
PGD	0.0284124	6	5	73	71	QA	-1
UNC45B	0.0284751	15	15	124	114	QA	-1
PSKH1	0.0285077	4	4	83	83	QA	-1
SLC38A1	0.0288087	1	1	16	16	ER	4.48e-07
ZNF675	0.0288573	2	2	7	7	ER	0.000128812
PGAM5	0.0288605	2	2	17	17	ER	6.84e-08
POLE2	0.0289392	4	4	4	4	ER	0.00521885
LNX2	0.0289629	7	5	10	10	ER	2.23e-05
CAST	0.0290429	10	9	29	29	ER.A	-1
CARD11	0.029305	6	6	10	10	ER	1.03e-05
CAMK1	0.0293065	7	6	44	44	QA	-1
DRD2	0.0293539	3	3	20	20	ER	7e-11
ADORA3	0.0294004	4	3	3	3	ER	0.0294004
PRPS1L1	0.0294273	4	3	72	71	QA	-1
CAPN5	0.029539	6	6	63	63	QA	-1
MRPL4	0.0296284	3	3	20	20	ER	4.06e-09
DLL1	0.029637	6	5	37	37	ER.A	-1
SCNN1A	0.0296758	10	10	134	132	QA	-1
SCAMP4	0.0296953	2	2	2	2	ER	0.0296953
HRC	0.029705	3	2	32	32	ER.A	-1
FMO4	0.029901	7	7	89	77	QA	-1
DUSP4	0.0299219	4	4	4	4	ER	0.0299219
PRADC1	0.0299482	3	2	5	5	ER	0.00812906
LRRC28	0.029951	3	3	30	29	ER.A	-1
PNMT	0.0301553	5	5	9	9	ER	0.000110401
CHRNA2	0.0301702	8	7	20	20	ER	2.71e-09
ZNF786	0.0301744	6	6	52	52	QA	-1
NLGN1	0.0302963	5	5	5	5	ER	0.0042142
DAO	0.0303769	5	4	33	33	ER.A	-1
HELLS	0.0304592	3	3	26	26	ER.A	-1
TMEM126A	0.0304891	7	5	16	16	ER	7.58e-08
MAP6	0.0304972	8	8	142	142	QA	-1
PRUNE	0.030697	5	5	49	48	QA	-1
RGL2	0.0307533	8	8	54	54	QA	-1
CDH17	0.0309876	9	8	18	18	ER	2.07e-08
GRIK4	0.0312073	10	7	12	12	ER	2.81e-06
PDE6C	0.0312481	12	11	155	153	QA	-1
SEC14L5	0.0313116	8	6	95	95	QA	-1
PTPN2	0.0313156	3	2	2	2	ER	0.0313156
PRPF40A	0.0314209	5	4	5	5	ER	0.00542353
LAYN	0.0314249	1	1	8	8	ER	0.000162569
RABL6	0.0314638	13	12	189	183	QA	-1
CIDEB	0.0317449	4	4	53	52	QA	-1
OSBP2	0.0318223	6	5	25	25	ER.A	-1
ENKUR	0.0318645	4	4	83	83	QA	-1
NOS2	0.0318789	3	3	7	7	ER	0.000578171
ITIH2	0.0319169	12	12	153	152	QA	-1
RFX2	0.0319702	10	8	93	93	QA	-1
FILIP1L	0.0319809	10	9	82	62	QA	-1
LY6G6F	0.0320418	4	4	21	21	ER.A	-1
CELA3B	0.0321229	1	1	33	33	ER.A	-1
AIP	0.0321474	3	3	15	15	ER	3.87e-08
TUBGCP3	0.0322043	3	3	11	11	ER	1.01e-06
NEK9	0.0322446	7	7	89	89	QA	-1
SCPEP1	0.0323475	5	5	23	23	ER.A	-1
IFNE	0.0324662	3	3	7	7	ER	0.00116486
DUSP23	0.0325634	2	2	106	104	QA	-1
ZER1	0.0327587	8	8	70	70	QA	-1
SMEK2	0.0327699	5	4	96	96	QA	-1
KIF14	0.0328667	3	3	17	17	ER	1.82e-08
CLASRP	0.0328733	4	3	3	3	ER	0.0328733
KCND2	0.0332126	5	4	7	7	ER	0.00039798
HOXB6	0.0332201	2	2	18	18	ER	1.06e-08
SLC4A1	0.0332232	11	10	100	100	QA	-1
MACROD2	0.0334731	4	3	35	35	ER.A	-1
AMER2	0.0334853	4	4	25	25	ER.A	-1
BIN3	0.0335279	9	9	139	138	QA	-1
RABEPK	0.0335535	4	2	4	4	ER	0.00574768
PSMF1	0.0335832	3	2	12	12	ER	1.58e-06
MAPK7	0.0336504	5	4	16	16	ER	4.07e-08
SEMA5B	0.0338024	4	4	78	78	QA	-1
LIF	0.0338515	5	4	4	4	ER	0.011731
LAMB4	0.0338635	19	17	114	111	QA	-1
KIAA2018	0.0338766	18	18	108	107	QA	-1
SFXN2	0.0339059	4	4	69	69	QA	-1
TMX2	0.0339282	3	3	31	31	ER.A	-1
DMXL2	0.033936	23	22	121	120	QA	-1
SV2B	0.0339667	13	12	182	181	QA	-1
MGAT5	0.0339748	6	5	25	25	ER.A	-1
PAX9	0.0341446	3	3	4	4	ER	0.0045965
ECEL1	0.0341592	8	8	66	65	QA	-1
TREH	0.0342646	3	3	87	87	QA	-1
NUAK2	0.034448	5	5	10	10	ER	0.000134876
MMP1	0.0344952	11	11	140	138	QA	-1
RAPGEF5	0.0345309	4	3	4	4	ER	0.0091799
ITGA9	0.0346377	9	9	33	33	ER.A	-1
ASS1	0.0348419	1	1	55	55	QA	-1
LRRC31	0.0348687	6	6	15	15	ER	1.07e-07
N6AMT2	0.0348696	3	2	25	25	ER.A	-1
GRID1	0.0349878	10	10	85	84	QA	-1
RASL10A	0.0350837	1	1	28	28	ER.A	-1
GDPD5	0.0352236	5	4	42	41	QA	-1
SLC36A4	0.0352364	3	3	3	3	ER	0.0352364
SSH3	0.0352392	8	8	167	166	QA	-1
CATSPERB	0.0352749	7	6	23	23	ER.A	-1
ZNF124	0.0353554	2	2	6	6	ER	0.000743248
RIPK1	0.0354418	3	3	22	22	ER.A	-1
CHRNA5	0.0354898	7	6	49	49	QA	-1
KLHDC8B	0.0355732	2	2	7	7	ER	0.00120312
HK3	0.0358069	22	20	239	236	QA	-1
CDC42EP4	0.0358609	6	4	35	35	ER.A	-1
MND1	0.0359749	2	2	7	7	ER	0.000334112
ADAMTSL5	0.0362526	3	2	3	3	ER	0.0362526
GABRD	0.0363076	4	3	3	3	ER	0.0363076
ZSCAN5B	0.0363786	4	3	14	14	ER	4.47e-07
IL12RB1	0.0364115	7	7	79	79	QA	-1
PARP6	0.0364171	4	4	12	12	ER	1.06e-05
MYO1G	0.036431	17	15	93	91	QA	-1
TMEM190	0.0364714	2	2	8	8	ER	3.5e-05
TEAD3	0.0365646	2	2	14	14	ER	1.04e-05
CDH24	0.0366846	5	3	13	13	ER	6.79e-06
NR1H3	0.0366869	7	6	11	11	ER	8.92e-06
GJA5	0.0367966	2	2	6	6	ER	0.00182955
SPRYD3	0.0369244	2	2	2	2	ER	0.0369244
GAS2L3	0.0369342	7	7	37	22	ER.A	-1
NTF3	0.0369745	4	3	49	49	QA	-1
STAG1	0.0371237	4	2	2	2	ER	0.0371237
IGFBP5	0.0373298	1	1	11	11	ER	1.1e-05
TGM7	0.0374067	12	11	121	121	QA	-1
MBD4	0.0374805	15	13	46	44	QA	-1
DOC2A	0.0374884	9	9	92	91	QA	-1
TMEM132E	0.0375387	5	4	13	13	ER	2.11e-07
GFRA1	0.0375592	4	3	4	4	ER	0.00567592
DSCR3	0.0375827	2	2	24	24	ER.A	-1
ANK2	0.0376169	37	31	128	119	QA	-1
ZNF587	0.0377658	1	1	5	5	ER	0.00428419
MTOR	0.0377889	7	7	7	7	ER	0.000550195
PCDH17	0.0378725	7	6	68	68	QA	-1
ZNF70	0.0378747	4	3	5	5	ER	0.00210021
SSTR1	0.0378783	2	2	2	2	ER	0.0378783
ACADVL	0.0380588	7	6	47	47	QA	-1
DEFB118	0.0380614	1	1	78	78	QA	-1
FHIT	0.0381429	3	3	3	3	ER	0.0118301
MRPS18B	0.0383451	3	2	3	3	ER	0.0383451
KRTAP10-4	0.0384417	1	1	5	5	ER	0.00355425
TTYH2	0.0385904	9	7	44	44	QA	-1
UGP2	0.038614	3	2	2	2	ER	0.038614
YES1	0.0386191	3	3	8	8	ER	0.00040266
FAM83B	0.0387183	8	7	82	81	QA	-1
FAM160B2	0.0387344	6	6	136	135	QA	-1
DAK	0.0387869	9	9	36	36	ER.A	-1
RTCA	0.0388025	9	8	68	68	QA	-1
EXOC4	0.0389308	10	10	37	37	ER.A	-1
PAQR5	0.0390318	6	5	19	19	ER	3.65e-10
CLK2	0.0390362	6	4	44	44	QA	-1
TTC4	0.039182	5	4	31	31	ER.A	-1
ACADL	0.0391974	5	5	7	7	ER	0.000873208
CA9	0.0392434	1	1	6	6	ER	0.000291169
OR10K2	0.0393333	4	4	18	18	ER	1.54e-07
PPP1R15B	0.0395524	5	5	27	27	ER.A	-1
DDX42	0.039641	7	7	10	10	ER	0.000195417
NCKAP5L	0.0396422	7	7	85	85	QA	-1
PRIMPOL	0.0398387	3	2	2	2	ER	0.0398387
CEACAM7	0.039856	2	2	57	57	QA	-1
PRPF38B	0.0398756	2	2	2	2	ER	0.0398756
USP28	0.0399815	17	16	181	178	QA	-1
ELANE	0.0400068	3	3	7	7	ER	9.11e-05
RPF2	0.0403143	1	1	4	4	ER	0.00324504
SLC26A9	0.0404066	8	5	68	68	QA	-1
TMX1	0.040437	1	1	2	2	ER	0.040437
ATP8B3	0.0404785	18	14	178	175	QA	-1
C8G	0.0405447	1	1	11	11	ER	1.85e-05
KIAA0556	0.0405509	13	12	108	107	QA	-1
SLC38A7	0.0405569	3	3	24	23	ER.A	-1
WDR75	0.0406153	3	3	11	11	ER	1.59e-05
ALPI	0.040651	6	4	5	5	ER	0.00820707
APBB1	0.0407633	5	5	44	44	QA	-1
SERINC1	0.0407718	4	4	67	67	QA	-1
TNS3	0.040784	14	11	214	213	QA	-1
C12orf65	0.0408024	1	1	2	2	ER	0.0408024
ZNF516	0.0408511	6	6	57	56	QA	-1
ANKRD52	0.0410595	4	3	76	76	QA	-1
COBL	0.0411305	5	5	27	27	ER.A	-1
ATP8A1	0.0411366	6	5	62	62	QA	-1
CYP27B1	0.0411438	1	1	5	5	ER	0.00428144
TRIM22	0.0411575	6	6	109	107	QA	-1
GUCY1A2	0.0411771	6	6	12	12	ER	4.69e-07
KLHL41	0.0412518	6	6	58	58	QA	-1
RAB21	0.0413567	1	1	24	24	ER.A	-1
SPATA33	0.0414137	2	2	5	5	ER	0.00362559
SIGLEC5	0.041429	2	2	10	9	ER	4.13e-05
GHRL	0.0415184	4	4	34	34	ER.A	-1
DHX34	0.0417927	9	7	49	49	QA	-1
C18orf8	0.0418924	5	5	55	55	QA	-1
NCAN	0.0419165	9	9	25	25	ER.A	-1
PIGT	0.0419596	6	6	59	59	QA	-1
ADPRM	0.0420069	4	4	4	4	ER	0.00886302
CAD	0.0420858	17	15	114	113	QA	-1
DPP9	0.0421349	4	4	7	7	ER	0.000496103
LMAN1L	0.0421595	2	2	4	4	ER	0.00927089
NUDT3	0.0421953	2	2	37	37	ER.A	-1
ARL14	0.0422101	3	2	15	15	ER	2.42e-07
CRISP2	0.0422251	1	1	5	5	ER	0.0065293
DEFB113	0.0422251	1	1	5	5	ER	0.0065293
UBXN1	0.0422654	3	3	7	7	ER	0.000131645
MEGF11	0.0423156	13	11	60	59	QA	-1
HOXA3	0.0423709	1	1	20	20	ER	9.23e-10
B4GALT5	0.0423938	2	2	11	11	ER	1.37e-05
HIST1H3H	0.042543	3	3	65	65	QA	-1
OPN3	0.0426613	7	6	124	123	QA	-1
CYP4F3	0.042866	6	5	29	18	ER.A	-1
TPP2	0.042908	4	4	12	12	ER	1.01e-05
UGT1A9	0.042985	2	2	6	6	ER	0.00255424
PRKAA2	0.0430565	4	3	5	5	ER	0.00211272
KRTAP10-11	0.0432693	1	1	4	4	ER	0.00348234
ZNF362	0.0433179	6	4	10	10	ER	2.19e-06
OR8A1	0.0433596	3	2	3	3	ER	0.0433596
APOL2	0.043412	2	2	3	3	ER	0.0136347
SPP2	0.0434419	5	4	6	6	ER	0.000133388
P4HB	0.0435187	3	3	38	38	ER.A	-1
LRP2BP	0.043549	4	4	5	5	ER	0.0132188
TSPYL1	0.043585	2	2	13	13	ER	6.93e-08
MCF2L2	0.0436079	13	11	101	99	QA	-1
C1QL4	0.0437437	1	1	5	5	ER	0.00414426
HERC4	0.0439708	4	4	21	21	ER.A	-1
AKR1B15	0.0440475	3	3	56	56	QA	-1
KRT4	0.0444065	4	4	84	83	QA	-1
TPR	0.0444594	19	17	176	173	QA	-1
ACER1	0.0444601	3	3	4	4	ER	0.00985348
DHX8	0.0445494	9	7	66	66	QA	-1
PFKL	0.0445804	14	11	121	118	QA	-1
PCDHA8	0.0447524	6	6	85	84	QA	-1
NEK5	0.044763	1	1	11	11	ER	5.11e-05
ENPP6	0.0449663	9	7	71	69	QA	-1
MOB3A	0.0450066	8	5	36	36	ER.A	-1
HIST1H4E	0.0451536	5	3	3	3	ER	0.0119062
SCARA5	0.045219	5	3	10	10	ER	6.17e-05
SGSM3	0.0452217	6	6	13	13	ER	1.82e-06
SEZ6L2	0.0452821	4	4	85	85	QA	-1
HIPK2	0.0453471	9	7	17	17	ER	3.92e-09
LMNA	0.0454781	3	2	28	28	ER.A	-1
EPCAM	0.0454833	3	2	20	20	ER	2.47e-09
ST6GALNAC1	0.0455282	5	4	62	62	QA	-1
AKTIP	0.0456028	2	2	34	34	ER.A	-1
CCNJ	0.0456985	3	3	3	3	ER	0.0112368
SRRM3	0.0458966	1	1	4	4	ER	0.00356364
SLC39A14	0.0459772	5	4	33	32	ER.A	-1
SEMA4A	0.0460373	4	4	28	28	ER.A	-1
TFF3	0.0461422	1	1	27	27	ER.A	-1
TRMT12	0.0461434	3	3	18	18	ER	1.15e-07
KCNH7	0.046148	9	8	87	86	QA	-1
BSCL2	0.0462132	4	4	68	68	QA	-1
NIPBL	0.0462452	11	9	79	78	QA	-1
ALKBH1	0.0462542	5	5	25	25	ER.A	-1
OR2AT4	0.0463176	3	3	11	11	ER	3.88e-05
PLA1A	0.0464768	5	5	16	16	ER	1.84e-07
REV3L	0.0467466	20	19	107	106	QA	-1
CHRNA4	0.0468412	2	2	62	60	QA	-1
NR1D1	0.0471465	3	3	16	16	ER	5.91e-08
KIF27	0.047188	5	4	41	41	QA	-1
WBSCR17	0.0471898	4	3	32	32	ER.A	-1
MYOZ2	0.0471913	2	2	5	5	ER	0.000793375
DENND2D	0.0472808	4	4	100	100	QA	-1
EIF4B	0.0473853	3	2	33	32	ER.A	-1
IGFALS	0.0474252	7	6	13	13	ER	7.17e-07
MMP11	0.0474648	6	5	9	9	ER	0.000130766
SH3RF1	0.047504	2	2	34	34	ER.A	-1
TFF2	0.0475239	2	2	28	28	ER.A	-1
PSME4	0.047608	8	6	8	8	ER	0.000173456
NUCB1	0.0476238	6	6	36	35	ER.A	-1
FAM167A	0.0476778	2	2	3	3	ER	0.0476778
PPM1G	0.0477144	2	2	2	2	ER	0.0477144
EIF4G1	0.0477809	17	16	55	55	QA	-1
PPP2R1B	0.0478724	4	4	12	12	ER	2.22e-06
INTS4	0.0479517	2	2	4	4	ER	0.00333047
CYP3A43	0.0480497	5	3	26	26	ER.A	-1
STXBP5L	0.0481311	10	10	36	36	ER.A	-1
ZNF710	0.0483123	3	3	4	4	ER	0.00955186
SARM1	0.048631	2	1	39	39	ER.A	-1
ZNF765	0.0486794	3	3	8	8	ER	0.000122492
MAEL	0.0487068	6	5	46	46	QA	-1
TTLL2	0.048881	7	4	41	41	QA	-1
DHRS13	0.0489787	2	2	29	27	ER.A	-1
ZNF513	0.049106	2	2	5	5	ER	0.0103156
ANKRD13D	0.0494345	3	3	8	8	ER	0.000149542
MYO1E	0.0495444	2	2	2	2	ER	0.0495444
GPR146	0.0495699	3	3	56	56	QA	-1
SPRYD4	0.0498433	5	5	27	27	ER.A	-1
PYCR2	0.049981	2	2	5	5	ER	0.00656499
PLA2G2A	0.0500627	1	1	13	13	ER	1.13e-07
SHOX2	0.0500763	2	2	2	2	ER	0.0500763
MMP19	0.0500958	5	5	132	132	QA	-1
SELO	0.0500997	8	8	146	144	QA	-1
RPS26	0.0502681	2	2	3	3	ER	0.0502681
PTDSS2	0.050274	2	2	60	60	QA	-1
MUT	0.050284	5	5	59	58	QA	-1
TBRG4	0.050389	3	2	8	8	ER	7.41e-05
UBE3B	0.0504389	8	7	97	97	QA	-1
CCDC105	0.0505281	6	6	53	53	QA	-1
PPAPDC2	0.0505779	5	4	59	59	QA	-1
PARP15	0.0506707	3	3	62	61	QA	-1
ADH4	0.0507109	1	1	16	16	ER	4.72e-08
TCF23	0.0507586	2	2	6	6	ER	0.00288647
TCIRG1	0.0508079	9	7	85	85	QA	-1
HBP1	0.0508995	3	3	24	24	ER.A	-1
TMCC2	0.0509598	9	8	21	21	ER.A	-1
ATP6V0A4	0.0510932	13	12	168	165	QA	-1
OR4F6	0.0513994	1	1	40	40	ER.A	-1
TOR3A	0.051442	3	3	11	11	ER	3.23e-06
PRDX3	0.0516264	3	3	44	43	QA	-1
IYD	0.0517157	4	3	3	3	ER	0.0163234
SSR3	0.0518993	2	2	5	5	ER	0.00108601
ERCC3	0.0521734	12	10	157	157	QA	-1
PROP1	0.0521837	2	2	2	2	ER	0.0521837
TXNRD2	0.0522842	1	1	6	6	ER	0.000517227
TSPAN5	0.0523159	1	1	6	6	ER	0.000479642
IFT27	0.0523541	2	2	2	2	ER	0.0523541
STRN	0.052423	6	6	36	36	ER.A	-1
ALS2	0.0524755	13	11	118	117	QA	-1
SEC31A	0.0525057	5	4	23	23	ER.A	-1
FRS3	0.0525787	2	2	13	13	ER	1.5e-07
LEPREL4	0.0525982	3	3	26	26	ER.A	-1
IGSF10	0.0526048	30	26	394	384	QA	-1
DNER	0.0526347	8	8	24	24	ER.A	-1
ARHGAP20	0.0528705	11	11	97	97	QA	-1
DNAJB8	0.0529057	3	3	30	30	ER.A	-1
MZF1	0.0529694	3	3	32	32	ER.A	-1
XRCC3	0.0529958	1	1	2	2	ER	0.0529958
ELMOD2	0.0530214	4	4	114	113	QA	-1
GPR111	0.0530229	6	5	59	59	QA	-1
PSMD2	0.0530595	7	7	8	8	ER	0.000217038
IL36B	0.0531835	2	2	12	12	ER	1.71e-05
EZH2	0.0532085	3	3	30	30	ER.A	-1
ZNF383	0.0532784	2	2	39	39	ER.A	-1
SALL2	0.0533356	4	4	11	11	ER	9.89e-07
SGSH	0.0534276	6	5	24	23	ER.A	-1
NME7	0.0535903	3	3	37	37	ER.A	-1
C5AR1	0.053725	4	4	7	7	ER	0.000397459
FGG	0.0537536	5	5	52	51	QA	-1
PKMYT1	0.0538173	3	3	38	38	ER.A	-1
PCDHB2	0.053832	4	3	37	37	ER.A	-1
GPR37L1	0.054042	5	5	105	105	QA	-1
CSTL1	0.054048	2	2	5	5	ER	0.00879045
CACNG7	0.0541872	4	4	17	17	ER	9.66e-09
ZNF12	0.0542536	2	2	5	5	ER	0.00706097
PSMB7	0.0543079	2	2	2	2	ER	0.0543079
EIF2A	0.0543199	3	3	3	3	ER	0.0130547
ST6GAL2	0.0543991	6	5	72	70	QA	-1
TMEM143	0.0544642	8	6	75	75	QA	-1
TCTE3	0.0545115	4	4	5	5	ER	0.00078599
PSMB5	0.0547698	4	4	8	8	ER	0.000150122
C16orf93	0.0548243	5	4	12	12	ER	1.34e-06
MYO9A	0.05486	19	16	180	179	QA	-1
HIPK4	0.0549636	5	5	74	74	QA	-1
RNF8	0.0549836	3	1	13	13	ER	5.21e-07
C1orf168	0.055005	6	6	39	39	ER.A	-1
ACTR1B	0.0551097	4	4	12	12	ER	6.33e-06
MFAP1	0.0551133	4	4	13	13	ER	1.19e-06
TCTEX1D2	0.0553083	1	1	4	4	ER	0.00500999
VENTX	0.055318	2	2	9	9	ER	0.000158297
CCDC27	0.0553255	5	4	22	22	ER.A	-1
SOS2	0.0554017	12	11	89	89	QA	-1
C16orf62	0.0554554	10	10	37	36	ER.A	-1
C1orf65	0.0555082	3	3	90	89	QA	-1
MYO1H	0.0555226	14	13	145	145	QA	-1
SPPL2A	0.0555328	2	2	2	2	ER	0.0555328
PCDHA7	0.0555482	5	5	138	136	QA	-1
FAM211B	0.0555768	6	3	97	96	QA	-1
SLC3A2	0.0556528	3	3	18	18	ER	1.12e-08
NUPL1	0.0556875	4	4	46	45	QA	-1
DDX17	0.0557756	2	2	2	2	ER	0.0557756
SUV420H2	0.0559999	2	2	46	46	QA	-1
OR51D1	0.0560032	5	5	52	51	QA	-1
TRMT5	0.0563082	4	3	44	43	QA	-1
PON1	0.0564195	1	1	13	13	ER	1.76e-06
AP1B1	0.0565827	11	10	65	65	QA	-1
ZCCHC7	0.0566292	5	3	46	46	QA	-1
BSPRY	0.0566295	2	2	75	75	QA	-1
TMCO2	0.0566324	2	2	73	73	QA	-1
ZNF7	0.0566547	5	5	21	21	ER.A	-1
GRK6	0.0566931	2	2	6	6	ER	0.00161683
PRELID2	0.056744	2	2	10	10	ER	3.31e-05
ELFN2	0.056782	9	8	176	175	QA	-1
POT1	0.0568782	4	3	3	3	ER	0.0189928
TMEM82	0.0569815	4	4	68	67	QA	-1
EYA2	0.0570254	6	5	35	35	ER.A	-1
CCL21	0.0570626	1	1	2	2	ER	0.0570626
UQCRC2	0.0571473	2	2	5	5	ER	0.010699
CCIN	0.0572455	2	2	20	20	ER	8.06e-10
ZNF385D	0.0573185	3	3	6	6	ER	0.000312299
ANKDD1A	0.0573266	5	5	81	80	QA	-1
DLEC1	0.057391	19	18	240	185	QA	-1
ZNF286A	0.0576008	2	1	2	2	ER	0.0576008
LPCAT3	0.057606	2	2	2	2	ER	0.057606
SLC24A3	0.0576099	9	8	16	16	ER	1.96e-08
LGALS12	0.0576209	3	2	2	2	ER	0.0576209
IRF2BPL	0.0576779	2	2	4	4	ER	0.00418972
ARRDC5	0.0577433	7	7	92	92	QA	-1
PLA2G2D	0.0578152	4	3	13	13	ER	3.15e-06
OR1M1	0.0578303	3	3	86	85	QA	-1
ODF3	0.0580143	4	3	4	4	ER	0.00716289
C16orf71	0.0580785	4	4	11	11	ER	5.33e-06
PTPN12	0.0580863	3	3	39	39	ER.A	-1
CKM	0.0581642	6	5	52	52	QA	-1
BDNF	0.0582928	3	3	4	4	ER	0.00831744
CA2	0.0584232	3	3	3	2	ER	0.0584232
CTR9	0.0584844	5	5	90	90	QA	-1
SEC63	0.058531	3	3	3	3	ER	0.0188705
LUZP2	0.0588272	2	2	41	40	QA	-1
TFAP2B	0.058886	3	3	22	22	ER.A	-1
OR1K1	0.0591647	6	3	45	45	QA	-1
SLC9A2	0.0591807	8	7	84	84	QA	-1
DSTYK	0.0592327	4	4	4	4	ER	0.0129589
ZNF709	0.059245	2	2	2	2	ER	0.059245
NLRP12	0.0593444	8	6	33	33	ER.A	-1
FAM169A	0.0595742	6	6	46	45	QA	-1
FGD3	0.059681	3	2	2	2	ER	0.059681
AQPEP	0.0597114	12	11	71	70	QA	-1
SH3BP5	0.0597155	6	5	33	33	ER.A	-1
PDE8B	0.0597475	2	2	8	8	ER	0.000500155
STK32B	0.059827	2	2	13	13	ER	2.59e-06
TSHR	0.0601961	3	2	16	16	ER	2.04e-08
DCUN1D5	0.0602168	2	2	8	8	ER	0.000101322
AGO2	0.060483	2	2	2	2	ER	0.060483
FAM19A4	0.06061	2	2	17	17	ER	3.36e-08
ZNF239	0.0606356	6	6	44	44	QA	-1
NINL	0.0606428	12	12	117	116	QA	-1
DYNC1I1	0.0608789	2	2	18	18	ER	4.93e-09
RNF130	0.0610914	3	3	4	4	ER	0.00453135
HAS1	0.0611558	3	2	38	38	ER.A	-1
GALNT2	0.0611744	6	5	74	74	QA	-1
GREM1	0.0612368	3	3	9	9	ER	2.66e-05
DZIP1	0.0612634	11	11	79	78	QA	-1
EHD4	0.0613033	6	5	33	33	ER.A	-1
AFG3L2	0.0613238	4	3	3	3	ER	0.0112214
SLC25A4	0.061329	2	2	6	6	ER	0.000363892
GLCCI1	0.0617591	4	3	15	15	ER	2.02e-08
TNFRSF21	0.0617655	3	3	31	31	ER.A	-1
OR1J2	0.061771	2	2	63	63	QA	-1
PGR	0.0620656	8	8	102	102	QA	-1
SPTLC3	0.062098	4	3	11	11	ER	1.5e-06
PIK3R5	0.0621715	9	9	26	25	ER.A	-1
FGFR1OP	0.0622604	4	4	30	30	ER.A	-1
FANCF	0.0626281	1	1	6	6	ER	0.00207167
NUDT22	0.062647	3	3	10	10	ER	4.46e-05
SRPRB	0.0628852	3	3	83	83	QA	-1
TPRX1	0.062963	2	1	13	13	ER	2.81e-06
RBM11	0.0629647	7	7	96	96	QA	-1
DACT1	0.0630173	5	4	74	74	QA	-1
KIAA1244	0.0631811	16	13	137	135	QA	-1
CATSPER4	0.063249	6	4	36	36	ER.A	-1
PTGR1	0.0632668	6	6	31	31	ER.A	-1
SPTBN1	0.0633182	21	19	137	136	QA	-1
TMEM200A	0.0633581	4	4	21	21	ER.A	-1
CLPP	0.0633741	1	1	24	24	ER.A	-1
CRAT	0.0634376	8	6	65	65	QA	-1
ZNF569	0.0634473	7	7	25	25	ER.A	-1
FIGN	0.0635235	7	6	7	7	ER	0.000473197
ZBTB49	0.0636385	9	9	36	36	ER.A	-1
PALB2	0.0636905	9	6	56	56	QA	-1
INSL6	0.0637767	2	1	2	2	ER	0.0637767
DCTN2	0.063793	4	3	40	40	ER.A	-1
ALDH1A3	0.0639103	5	5	63	62	QA	-1
RPP40	0.0641016	1	1	15	15	ER	7.7e-08
ATG12	0.0642478	2	1	10	10	ER	5.25e-05
CYB561A3	0.0642518	4	4	30	30	ER.A	-1
STK24	0.0642688	1	1	80	80	QA	-1
ZNF613	0.0646082	4	4	20	20	ER	2.8e-10
VPS9D1	0.0646128	5	4	15	15	ER	5.38e-07
CD68	0.0646367	3	3	6	6	ER	0.001114
CEND1	0.0646572	3	3	61	60	QA	-1
CCDC147	0.0647332	11	9	31	31	ER.A	-1
SNAPC3	0.0647482	1	1	10	10	ER	2.26e-05
USP14	0.0648046	3	2	53	53	QA	-1
SYCP3	0.0648153	2	2	19	19	ER	4.3e-09
TMEM135	0.0648419	3	2	8	8	ER	0.000123199
TRUB2	0.0649561	4	4	7	7	ER	0.000624236
ECHDC3	0.0650387	3	3	88	88	QA	-1
MXI1	0.0651489	1	1	2	2	ER	0.0651489
TMEM216	0.0651885	1	1	31	31	ER.A	-1
FAM71E1	0.0652213	2	2	20	19	ER	2.52e-10
CPPED1	0.0652215	5	5	89	87	QA	-1
ASTN2	0.0654395	10	8	83	83	QA	-1
TAF1C	0.0654857	14	11	127	127	QA	-1
SHPRH	0.0655431	16	14	79	72	QA	-1
FEM1C	0.0656262	4	4	4	4	ER	0.00200742
CCDC36	0.0656506	2	2	2	2	ER	0.0656506
LRP12	0.0659157	7	7	38	38	ER.A	-1
CYP4F11	0.0660334	5	4	7	7	ER	0.00087225
OR2AG2	0.0661073	4	4	49	49	QA	-1
HAUS6	0.0661167	4	3	3	3	ER	0.0170123
SAAL1	0.0661702	4	4	17	17	ER	4.02e-08
PI4KA	0.0662455	8	7	41	40	QA	-1
IER5	0.0662701	1	1	10	10	ER	4.15e-05
DCLRE1A	0.0663306	5	5	11	11	ER	4.48e-06
HLA-DMA	0.0663565	3	2	2	2	ER	0.0663565
AMN	0.0663572	2	2	2	2	ER	0.0663572
LRFN4	0.0663997	6	4	6	6	ER	0.000656358
CA10	0.0664656	3	2	35	35	ER.A	-1
ARMC2	0.0665504	7	7	54	45	QA	-1
VGLL3	0.0665827	5	4	4	4	ER	0.00704207
RCOR1	0.0666444	2	2	2	2	ER	0.0666444
LRSAM1	0.0667431	5	4	26	26	ER.A	-1
LAIR1	0.0668734	4	4	6	6	ER	0.000342598
MTBP	0.0669104	7	7	220	218	QA	-1
LGSN	0.0673079	7	6	12	12	ER	3.38e-06
MLNR	0.0674169	2	2	23	23	ER.A	-1
IGSF5	0.0674531	8	7	63	63	QA	-1
PIK3IP1	0.0675612	2	2	12	12	ER	5.07e-06
SLCO1B7	0.067601	2	2	14	14	ER	1.25e-06
FBXO10	0.067658	11	11	60	60	QA	-1
VCPIP1	0.0677571	2	2	2	2	ER	0.0677571
C5orf20	0.0678037	2	1	4	4	ER	0.00675222
NOX3	0.067898	5	4	60	60	QA	-1
CLEC4E	0.0679992	3	3	32	32	ER.A	-1
2022-09-08	0.0680341	6	5	30	30	ER.A	-1
BRD9	0.0680948	4	4	16	16	ER	4.28e-08
AP2B1	0.068111	3	3	3	3	ER	0.0199783
NNMT	0.068147	8	6	49	49	QA	-1
PDYN	0.0682219	3	2	2	2	ER	0.0682219
SEMA5A	0.0682933	13	12	118	118	QA	-1
ATXN10	0.0683984	5	5	21	21	ER.A	-1
HNRNPH1	0.0684754	1	1	10	10	ER	2.15e-05
TACC1	0.0687427	5	5	68	68	QA	-1
XPA	0.0688718	1	1	2	2	ER	0.0688718
SIGLEC8	0.0688796	2	2	67	67	QA	-1
TNFAIP8L3	0.0690461	2	1	10	10	ER	1.99e-05
GDAP1	0.0690954	6	5	99	99	QA	-1
ARRDC2	0.0690967	6	5	34	34	ER.A	-1
LXN	0.069156	2	2	21	21	ER.A	-1
MINK1	0.0691878	7	7	7	7	ER	0.000352847
LURAP1L	0.0692321	2	2	28	28	ER.A	-1
CCKAR	0.0692405	7	7	59	58	QA	-1
CUX2	0.0693871	2	2	2	2	ER	0.0693871
CD101	0.0694685	9	8	53	53	QA	-1
LGALS13	0.0694713	4	4	10	10	ER	8.1e-05
GPR182	0.0694734	4	3	6	6	ER	0.0010564
DRG2	0.0695653	4	4	5	5	ER	0.00102484
ZNF609	0.0695663	9	9	38	37	ER.A	-1
NTN3	0.0696806	5	4	36	36	ER.A	-1
SP3	0.0696952	6	6	35	35	ER.A	-1
TMEM110-MUSTN1	0.069784	1	1	2	2	ER	0.069784
2022-03-08	0.0698835	3	2	9	9	ER	3.35e-05
APOBEC4	0.0698964	2	2	7	7	ER	0.000710434
HPSE	0.0702128	6	5	27	27	ER.A	-1
OLFM2	0.0703739	2	2	8	8	ER	6.51e-05
KIAA1009	0.0704608	8	8	40	37	ER.A	-1
PPP1R3B	0.0705539	3	3	4	4	ER	0.0202259
TMEM53	0.0705921	1	1	10	10	ER	3.3e-05
CLPB	0.0706679	10	9	22	22	ER.A	-1
MAPKAP1	0.0706779	4	3	33	33	ER.A	-1
DUS4L	0.0707214	3	3	3	3	ER	0.0207565
PTPN11	0.0707911	2	2	2	2	ER	0.0707911
FBXO41	0.0708018	8	7	19	19	ER	6.03e-09
ZNF619	0.0708679	5	4	16	16	ER	1.51e-07
POLR3E	0.0709765	9	9	24	24	ER.A	-1
CNDP1	0.0709993	4	3	3	3	ER	0.0176221
CCDC146	0.0710087	9	8	165	164	QA	-1
UNG	0.0712742	1	1	4	4	ER	0.0232829
FAM208A	0.0713176	10	7	18	18	ER	7.13e-07
ANKRD40	0.0714628	1	1	5	5	ER	0.000639366
ZNF574	0.0714859	9	8	24	24	ER.A	-1
IPO7	0.0717437	3	2	6	6	ER	0.000190716
OLFML2B	0.0717699	8	6	29	29	ER.A	-1
MYCBP2	0.0718021	26	23	132	131	QA	-1
CCDC77	0.0718513	9	9	117	117	QA	-1
ZNF169	0.0718569	5	4	49	48	QA	-1
EXT2	0.0719397	16	15	69	69	QA	-1
DLGAP3	0.0719501	5	5	48	48	QA	-1
CPSF6	0.0719781	5	5	7	7	ER	8.34e-05
ZPBP	0.0720348	1	1	20	20	ER	9.35e-11
ZNF789	0.0721171	3	3	5	5	ER	0.00524546
FAM111B	0.0721882	2	2	2	2	ER	0.0721882
SELENBP1	0.0723016	6	5	64	64	QA	-1
PTPRC	0.0725553	4	4	12	12	ER	1.42e-06
CXCL16	0.0726321	1	1	41	41	QA	-1
MBP	0.072702	2	2	29	29	ER.A	-1
CHAC1	0.07271	2	2	3	3	ER	0.0153809
ARL6IP5	0.0727888	4	4	42	42	QA	-1
STX11	0.0728281	3	3	26	24	ER.A	-1
FAM134C	0.0729077	2	2	14	14	ER	3.23e-06
CCNE2	0.0730945	4	3	48	48	QA	-1
C12orf68	0.0731146	2	2	2	2	ER	0.0731146
ANKRD34B	0.0732084	6	5	94	94	QA	-1
SCGB1D4	0.0732145	1	1	19	19	ER	1.85e-09
DDX41	0.0732434	6	6	83	83	QA	-1
WDHD1	0.0732672	6	6	23	23	ER.A	-1
SLC38A2	0.0733546	3	3	79	79	QA	-1
SRRM4	0.0733688	2	2	27	27	ER.A	-1
NT5DC1	0.0733826	2	2	19	19	ER	8.44e-09
FSCN3	0.0734461	9	8	62	61	QA	-1
AGPAT6	0.0734973	5	4	14	13	ER	9.73e-07
HEATR6	0.0735992	7	6	18	18	ER	1.08e-08
SLC5A1	0.0736035	7	5	42	42	QA	-1
ZFPM1	0.0736356	5	5	22	22	ER.A	-1
RSPH6A	0.0736372	7	7	98	98	QA	-1
RNF219	0.0737983	2	2	2	2	ER	0.0737983
SMNDC1	0.0738264	2	2	11	11	ER	3.97e-06
FAM221B	0.0738769	5	5	40	40	ER.A	-1
GPR126	0.0739566	9	8	30	30	ER.A	-1
PITPNC1	0.0742108	2	2	2	2	ER	0.0742108
GLIS3	0.0742417	2	2	2	2	ER	0.0742417
OR5H2	0.0743885	3	2	27	27	ER.A	-1
LYST	0.0745778	31	28	181	177	QA	-1
GDAP2	0.0745942	9	8	47	46	QA	-1
CYP3A5	0.0746125	4	4	40	40	ER.A	-1
TULP3	0.0746321	5	4	5	5	ER	0.00620836
ASAP3	0.0746852	7	7	29	29	ER.A	-1
HINFP	0.0747199	3	3	18	18	ER	3.2e-08
A3GALT2	0.0747765	1	1	4	4	ER	0.00782453
TNFRSF17	0.0747985	2	2	3	3	ER	0.0227177
CEP85L	0.0749788	8	7	72	72	QA	-1
SOX10	0.0750287	2	2	2	2	ER	0.0750287
LGALS2	0.0752756	5	4	13	13	ER	3.18e-07
NMBR	0.0753022	6	6	75	75	QA	-1
USP33	0.0756145	4	4	6	6	ER	0.00161325
FLNB	0.0756429	26	25	178	174	QA	-1
EMILIN2	0.0756525	13	12	132	131	QA	-1
TNFRSF14	0.0758939	2	2	3	3	ER	0.021669
UNC13B	0.0760831	15	15	110	109	QA	-1
L3MBTL1	0.0761155	5	4	4	4	ER	0.0141808
CD82	0.0761167	3	3	3	3	ER	0.0256904
SLC25A20	0.0761242	3	3	56	56	QA	-1
ATG2A	0.0762327	9	9	18	18	ER	1.86e-08
CCBE1	0.0762801	5	4	6	6	ER	0.00380822
OLFML1	0.0763189	4	4	60	60	QA	-1
FAM98A	0.0764142	9	8	66	66	QA	-1
SNED1	0.0764942	9	9	55	55	QA	-1
DHX57	0.0765497	19	18	232	229	QA	-1
ZNF221	0.0766025	8	8	17	17	ER	6.06e-08
SHQ1	0.0767314	6	6	26	26	ER.A	-1
C6orf89	0.0769664	5	4	54	54	QA	-1
IRF9	0.0771012	2	2	7	7	ER	8.48e-05
NELFB	0.0773817	6	6	23	23	ER.A	-1
SFXN3	0.0776223	8	7	100	100	QA	-1
SULT1C4	0.0776392	1	1	2	2	ER	0.0776392
P2RX5	0.0776692	5	4	99	98	QA	-1
ATP9B	0.0778217	13	11	142	142	QA	-1
ZNF80	0.0778305	2	2	18	18	ER	5.88e-10
TSPYL5	0.0778783	5	5	62	62	QA	-1
VANGL2	0.0779001	3	3	8	8	ER	0.00045618
COL23A1	0.0779976	9	7	47	45	QA	-1
TYW1	0.0780423	3	3	24	24	ER.A	-1
TCERG1	0.078043	5	5	13	13	ER	5.83e-07
CD164L2	0.0781952	2	2	2	2	ER	0.0781952
LAD1	0.0782024	9	9	59	59	QA	-1
FAM173A	0.0782248	2	2	2	2	ER	0.0782248
CEBPZ	0.0783024	5	4	66	64	QA	-1
BLOC1S4	0.078589	1	1	60	59	QA	-1
POLR2D	0.0786854	3	3	19	19	ER	4.5e-10
CHD1	0.0788059	7	7	37	37	ER.A	-1
COLEC12	0.0788177	7	7	28	28	ER.A	-1
MCU	0.0788221	1	1	26	26	ER.A	-1
PAX6	0.0789694	3	3	4	4	ER	0.0106786
PARP2	0.0791065	4	3	64	64	QA	-1
KIF18A	0.0791613	6	6	23	23	ER.A	-1
CPT2	0.0791818	12	12	125	88	QA	-1
LRRC42	0.0791883	7	6	26	26	ER.A	-1
AMT	0.0791942	8	8	110	110	QA	-1
SLC13A2	0.079222	6	6	6	6	ER	0.000241218
HAUS4	0.079236	4	3	9	9	ER	3.03e-05
MLK4	0.0792362	8	8	104	103	QA	-1
RAB3GAP1	0.079604	7	7	74	74	QA	-1
ELOVL2	0.0796409	5	5	18	18	ER	7.04e-08
SSPN	0.0796572	1	1	2	2	ER	0.0796572
HES6	0.0797274	1	1	59	58	QA	-1
SERINC3	0.0797533	4	4	17	17	ER	5.85e-08
SLC2A14	0.0797752	2	2	6	6	ER	0.000831884
TSHZ3	0.0799441	8	7	88	87	QA	-1
HLA-DQB2	0.0799463	2	2	55	55	QA	-1
CELSR2	0.08005	34	32	383	368	QA	-1
RNF212	0.0800717	2	2	2	2	ER	0.0800717
KCNN3	0.0801005	5	4	47	47	QA	-1
ZBTB6	0.0801427	5	5	14	14	ER	5.8e-07
PXN	0.0801791	4	4	4	4	ER	0.00281364
WDR65	0.0801858	10	8	137	135	QA	-1
SUCLG2	0.0801901	2	2	2	2	ER	0.0801901
CLDN5	0.0803032	1	1	1	1	ER	0.0803032
SSR1	0.0803032	1	1	1	1	ER	0.0803032
CYP27C1	0.0803534	4	4	33	33	ER.A	-1
LRRC55	0.0803666	2	2	2	2	ER	0.0803666
TNPO2	0.0804513	4	4	27	27	ER.A	-1
AMZ2	0.0804844	3	3	61	61	QA	-1
JAM2	0.0805034	1	1	48	48	QA	-1
OPRL1	0.0805783	10	9	17	17	ER	8.95e-09
HS1BP3	0.0806863	5	5	38	38	ER.A	-1
RAB3IL1	0.0807273	5	5	26	26	ER.A	-1
PGS1	0.0807692	5	5	150	148	QA	-1
TRIM63	0.0808399	3	2	70	70	QA	-1
OR11A1	0.0808998	2	2	10	10	ER	6.32e-06
PDIK1L	0.0809421	1	1	2	2	ER	0.0809421
GAK	0.0810123	21	18	133	132	QA	-1
ONECUT2	0.0810645	2	2	36	36	ER.A	-1
KCTD17	0.0813306	2	2	2	2	ER	0.0813306
2022-03-01	0.0814239	3	2	2	2	ER	0.0814239
STX17	0.0814735	1	1	2	2	ER	0.0814735
TUBGCP5	0.0815585	6	6	26	26	ER.A	-1
PIGG	0.0815938	8	8	48	48	QA	-1
HDAC7	0.0816396	6	5	105	104	QA	-1
SOX9	0.0816703	2	2	2	2	ER	0.0215768
ZNF205	0.0817102	6	4	6	6	ER	0.00089005
HAP1	0.0818287	6	5	30	30	ER.A	-1
ACBD4	0.0819181	2	2	2	2	ER	0.0819181
EDNRB	0.0819227	3	3	3	3	ER	0.0263428
MICALL2	0.0820173	8	7	41	41	QA	-1
ANPEP	0.0821255	9	9	18	18	ER	6.06e-07
SLC43A3	0.0821621	4	3	29	29	ER.A	-1
TMEM39B	0.0822038	2	2	12	12	ER	1.27e-06
PEX1	0.0823112	13	11	45	45	QA	-1
PPAP2C	0.0823946	5	5	48	48	QA	-1
ANO7	0.0824016	14	13	220	219	QA	-1
SLC18A1	0.0824458	9	8	9	9	ER	7.24e-05
COX6A1P2	0.0824941	1	1	3	3	ER	0.00663956
CELA2A	0.0825335	5	3	31	31	ER.A	-1
NR2E1	0.0828001	2	2	2	2	ER	0.0828001
NAGK	0.0828181	6	5	26	26	ER.A	-1
MAPK15	0.0828734	4	4	59	58	QA	-1
PHTF2	0.0829026	2	2	15	15	ER	7.45e-08
SERPINB4	0.0829893	7	7	79	79	QA	-1
GOSR2	0.0831867	3	2	21	21	ER.A	-1
ARMC1	0.0832567	2	2	15	15	ER	4.54e-07
SLC36A2	0.0833508	3	3	14	14	ER	1.38e-07
ABCA2	0.0834958	13	11	73	73	QA	-1
OR5J2	0.0835426	3	2	2	2	ER	0.0835426
UMPS	0.0837414	2	2	2	2	ER	0.0837414
TBC1D13	0.0837884	3	3	4	4	ER	0.00526941
CCDC97	0.0837918	2	2	12	12	ER	6.66e-07
NUTM1	0.083812	8	7	153	150	QA	-1
LRRC32	0.0838758	5	4	21	21	ER.A	-1
LDLR	0.0839699	14	13	107	107	QA	-1
CLK3	0.0840074	5	5	5	5	ER	0.00218893
TCAP	0.0841647	2	1	15	15	ER	7.45e-07
MLEC	0.0841747	2	2	2	2	ER	0.0841747
OR11L1	0.0842039	2	2	3	3	ER	0.0179487
MTHFD1L	0.0842093	6	6	15	15	ER	6.48e-07
NAT1	0.0842097	1	1	8	8	ER	0.000400341
MFSD3	0.0842633	3	2	18	18	ER	2.83e-08
KIF1C	0.0843174	9	7	107	107	QA	-1
CCNT2	0.0843251	1	1	5	5	ER	0.000924761
ZDHHC24	0.0843429	1	1	2	2	ER	0.0843429
LRRC43	0.0843469	6	4	21	21	ER.A	-1
RNF139	0.0843594	3	3	7	7	ER	0.000178713
TRIM8	0.0844015	4	2	28	28	ER.A	-1
PATL1	0.0846167	2	1	2	2	ER	0.0846167
APOA1	0.0846866	5	4	9	9	ER	5.21e-05
ETNK1	0.0846883	5	4	4	4	ER	0.00503206
RAPGEFL1	0.0848266	4	4	11	11	ER	2.91e-05
NLRP13	0.0848835	6	6	56	56	QA	-1
FRMD4B	0.0850036	9	9	49	49	QA	-1
RNASE8	0.0850629	1	1	4	4	ER	0.0192583
SZT2	0.0850928	13	13	100	85	QA	-1
PRR25	0.0852835	1	1	2	2	ER	0.0852835
IRS1	0.0852879	13	10	127	127	QA	-1
ETV7	0.0854266	9	9	97	97	QA	-1
KIFC2	0.0854595	3	2	5	5	ER	0.0113025
C2orf57	0.0854908	5	5	37	37	ER.A	-1
ACSM1	0.0855106	5	4	113	111	QA	-1
MTIF2	0.0855421	7	6	32	32	ER.A	-1
APCDD1	0.085544	7	7	61	48	QA	-1
MRPL54	0.0855941	2	1	2	2	ER	0.0855941
HTR5A	0.0856613	2	2	4	4	ER	0.00291788
ZBTB48	0.0856995	3	3	13	13	ER	2.77e-07
SLC22A3	0.0858963	8	6	40	40	ER.A	-1
PRIM1	0.0859086	2	1	80	80	QA	-1
MTF1	0.0860804	4	4	22	22	ER.A	-1
BAI1	0.0861466	5	3	45	45	QA	-1
SNX13	0.086339	2	2	21	21	ER.A	-1
DUSP22	0.0864367	5	5	47	47	QA	-1
LRFN3	0.0865292	7	6	29	29	ER.A	-1
TLR5	0.0865386	2	2	2	2	ER	0.0865386
SLC38A6	0.0865798	2	2	4	4	ER	0.00781665
ACTR8	0.0866873	2	2	2	2	ER	0.0866873
ATP6V0A1	0.0867159	7	7	54	54	QA	-1
TXNDC2	0.086802	7	5	14	13	ER	2.45e-06
RASSF8	0.0869387	2	2	14	14	ER	3.13e-07
KANK2	0.0871138	12	11	135	134	QA	-1
DNAJC16	0.0874422	6	4	33	33	ER.A	-1
BBOX1	0.0874756	2	2	19	19	ER	2.02e-09
CTSD	0.0875631	2	2	2	2	ER	0.0875631
PIK3C2A	0.0877139	8	8	38	38	ER.A	-1
CCDC92	0.0878292	5	5	33	33	ER.A	-1
GNAT1	0.087926	1	1	15	15	ER	4.5e-07
PANK4	0.0879461	4	4	28	28	ER.A	-1
CFH	0.0879522	6	5	6	5	ER	0.0010583
GRIA1	0.0879522	9	8	8	8	ER	0.000131881
DSC1	0.0880007	12	12	145	144	QA	-1
CHST1	0.0880007	1	1	1	1	ER	0.0880007
BTBD2	0.0880821	5	5	66	65	QA	-1
SYNGR1	0.0881559	3	2	2	2	ER	0.0881559
EVX2	0.0883716	4	3	23	23	ER.A	-1
COIL	0.0884149	2	2	4	4	ER	0.00333119
DNTTIP2	0.0884569	1	1	1	1	ER	0.0884569
SP7	0.0887225	2	1	8	8	ER	3.62e-05
KCNV1	0.0887446	2	2	2	2	ER	0.0887446
PARVG	0.0887701	8	7	84	83	QA	-1
CEL	0.0888527	3	2	2	2	ER	0.0888527
ARSK	0.0889958	4	4	32	32	ER.A	-1
HEYL	0.0890282	3	3	11	11	ER	8.23e-06
DNAJC11	0.0892524	4	4	13	13	ER	2.83e-06
HEXIM1	0.0893705	4	4	8	8	ER	0.000175162
LY6G6D	0.089539	1	1	8	8	ER	7.4e-05
TIAF1	0.0895471	1	1	22	22	ER.A	-1
AGFG2	0.0895505	7	6	9	8	ER	8.26e-05
COL8A2	0.0896001	1	1	3	3	ER	0.00833486
WDR76	0.0898004	2	2	2	2	ER	0.0898004
NCR3	0.0898177	2	2	2	2	ER	0.0898177
MICAL3	0.090087	18	17	214	211	QA	-1
DYNC2LI1	0.0901517	3	3	7	7	ER	0.000414453
ARFGAP2	0.0901829	4	3	128	128	QA	-1
CKAP5	0.0901997	4	4	65	65	QA	-1
CNPY4	0.0902086	2	1	2	2	ER	0.0902086
SYDE1	0.0902573	1	1	12	12	ER	8.17e-06
PPAP2B	0.090298	2	2	4	4	ER	0.0131128
TRIM72	0.0903722	3	2	2	2	ER	0.0903722
PMEPA1	0.0904677	2	2	83	82	QA	-1
DDX19A	0.090472	1	1	8	8	ER	9.89e-05
CRX	0.0905376	1	1	8	8	ER	0.000495451
FKBP4	0.0905457	2	2	4	4	ER	0.0119604
PTPN18	0.0905646	6	4	20	20	ER	3.63e-10
DNAJB11	0.0905819	1	1	1	1	ER	0.0905819
DSG4	0.0905906	11	11	71	71	QA	-1
BARHL1	0.0906055	1	1	8	8	ER	6.73e-05
MIB2	0.0906282	7	6	52	52	QA	-1
TPMT	0.0907589	3	2	19	19	ER	2.28e-09
SRFBP1	0.0908768	3	3	17	17	ER	8.42e-08
C10orf12	0.0909064	5	5	21	21	ER.A	-1
WSCD1	0.0909819	9	9	21	21	ER.A	-1
CD27	0.0911186	1	1	19	17	ER	3.1e-08
PNN	0.0912427	2	2	53	51	QA	-1
SEPW1	0.0913824	1	1	51	50	QA	-1
ITGAD	0.091399	14	13	179	177	QA	-1
CD200	0.0914161	3	3	3	3	ER	0.0114261
C21orf62	0.0914743	2	2	82	82	QA	-1
PHF14	0.0915723	3	2	2	2	ER	0.0915723
AGPAT3	0.0916385	5	5	9	9	ER	0.000245848
STX7	0.091725	1	1	2	2	ER	0.091725
TBCE	0.0918091	4	4	13	13	ER	6.07e-06
GPX6	0.0918721	2	1	2	2	ER	0.0918721
APP	0.0920756	4	4	13	13	ER	4.2e-07
CARD9	0.0921734	1	1	1	1	ER	0.0921734
GAMT	0.0921734	1	1	1	1	ER	0.0921734
GPI	0.0921913	7	7	51	51	QA	-1
MPDZ	0.0922085	7	7	41	41	QA	-1
MS4A6A	0.0922225	1	1	81	81	QA	-1
SNAP25	0.0924641	2	2	5	5	ER	0.00276082
POLR2G	0.0926129	1	1	5	5	ER	0.000899492
CAP1	0.0927146	2	2	28	28	ER.A	-1
NAA35	0.0927268	7	5	62	62	QA	-1
GCC2	0.0928439	8	7	97	97	QA	-1
DDTL	0.0929939	1	1	16	16	ER	7.18e-08
TGFB2	0.093041	2	1	35	35	ER.A	-1
GNA15	0.0930693	1	1	22	22	ER.A	-1
SYNJ2	0.0931055	12	11	108	107	QA	-1
ITGA8	0.09313	5	5	9	9	ER	4.96e-05
LAMP5	0.0933197	3	2	2	2	ER	0.0933197
SIGLEC7	0.0933268	6	6	28	28	ER.A	-1
HIP1R	0.0933652	12	11	36	36	ER.A	-1
DAP3	0.093406	6	6	180	178	QA	-1
C6orf120	0.0934317	1	1	17	17	ER	1.26e-08
NR1D2	0.0934585	4	3	6	6	ER	0.000546726
GCDH	0.0935256	4	3	9	9	ER	0.00010091
PTK7	0.0936674	9	8	35	35	ER.A	-1
FNBP1	0.0937131	2	2	7	7	ER	0.000330978
C8orf86	0.0937379	2	2	24	24	ER.A	-1
PER2	0.0937982	16	15	73	73	QA	-1
SETD8	0.0940475	1	1	1	1	ER	0.0940475
NRG2	0.0940538	9	8	71	71	QA	-1
QPCTL	0.0941123	3	3	58	58	QA	-1
CD200R1L	0.0941302	1	1	8	8	ER	0.000104683
FOXJ3	0.094138	5	4	90	90	QA	-1
AC040977.1	0.0942212	1	1	22	22	ER.A	-1
F2RL2	0.094335	2	2	4	4	ER	0.00827386
MCMDC2	0.0945202	3	3	3	3	ER	0.0125888
NMRK1	0.0945505	1	1	17	17	ER	3.11e-08
PABPN1	0.0945685	2	2	2	2	ER	0.0945685
CHST6	0.0946476	2	2	51	50	QA	-1
SCGN	0.0946478	7	6	168	168	QA	-1
ADRBK2	0.0946869	3	3	94	94	QA	-1
CABLES2	0.0947256	5	4	38	38	ER.A	-1
IQSEC3	0.0949316	6	4	11	11	ER	1.9e-05
TCAIM	0.0953262	2	2	2	2	ER	0.0953262
STRIP2	0.0953971	6	4	14	14	ER	5.81e-08
HIST1H3A	0.0954484	5	5	34	34	ER.A	-1
BEND7	0.0954949	3	2	6	6	ER	0.0029049
HRASLS2	0.0955158	2	2	26	26	ER.A	-1
RNF157	0.0955236	8	8	30	30	ER.A	-1
PPP2R3A	0.0955822	14	14	101	101	QA	-1
SAV1	0.0956704	3	3	37	37	ER.A	-1
TTC17	0.0958069	9	8	28	28	ER.A	-1
HRH1	0.0958267	3	3	40	40	ER.A	-1
ZNF215	0.0958755	7	6	43	43	QA	-1
PEAR1	0.095901	7	6	10	10	ER	8.08e-05
AGK	0.0960534	6	6	17	17	ER	2.47e-08
ST6GALNAC5	0.0960856	2	2	12	12	ER	3.74e-06
SYNGR4	0.0961736	3	3	29	29	ER.A	-1
CAPNS2	0.0962796	4	2	2	2	ER	0.0962796
KCNQ3	0.0963956	5	5	18	18	ER	5.99e-09
SLC44A2	0.0964012	10	9	58	58	QA	-1
CLU	0.0964811	3	2	2	2	ER	0.0964811
KANSL1L	0.0966063	15	15	107	107	QA	-1
C1orf210	0.0966719	3	3	55	55	QA	-1
TMEM81	0.0969263	4	4	45	45	QA	-1
DMXL1	0.0969507	30	24	217	213	QA	-1
CLYBL	0.0969589	2	1	16	16	ER	1.94e-07
KITLG	0.0969684	2	2	2	2	ER	0.0969684
RNF182	0.0969745	2	2	12	12	ER	2.57e-05
CDH15	0.0972911	5	5	12	12	ER	6.01e-06
TPPP2	0.097331	2	2	2	2	ER	0.097331
ILDR1	0.0975875	8	8	72	72	QA	-1
SMARCB1	0.097743	1	1	12	12	ER	2.03e-06
SCN2A	0.0977693	8	5	63	62	QA	-1
ARHGEF11	0.0982262	15	15	273	268	QA	-1
CCNI	0.0982648	1	1	1	1	ER	0.0982648
FOPNL	0.0982715	2	1	1	1	ER	0.0982715
RNF151	0.0984959	1	1	1	1	ER	0.0984959
SYDE2	0.0986645	6	5	27	27	ER.A	-1
CRYGB	0.0987201	2	2	2	2	ER	0.0987201
C11orf35	0.0988346	1	1	3	3	ER	0.00965047
KIAA1524	0.0988898	5	5	86	84	QA	-1
CHST10	0.0989623	4	4	5	5	ER	0.00098707
CLLU1	0.098971	3	3	10	10	ER	1.25e-05
HGFAC	0.0990098	4	4	135	133	QA	-1
NDUFAF3	0.0993552	3	3	69	68	QA	-1
C5orf34	0.0994766	4	4	10	10	ER	4.51e-05
SLC6A17	0.0994861	7	7	95	93	QA	-1
KIF11	0.0994914	2	2	2	2	ER	0.0994914
FAM208B	0.0995019	13	13	136	135	QA	-1
KIF3B	0.0995218	7	6	17	17	ER	1.18e-07
AMFR	0.0996101	6	6	93	93	QA	-1
CUEDC2	0.0996382	8	6	68	68	QA	-1
RAB40C	0.0997556	4	4	11	11	ER	3.02e-07
F11	0.0999771	6	6	8	8	ER	0.000235691
EXOSC5	0.0999805	3	3	55	55	QA	-1
GRWD1	0.100097	5	5	81	79	QA	-1
NRXN3	0.100254	12	11	16	16	ER	6.94e-08
LRRC16A	0.100527	8	8	55	54	QA	-1
DPP6	0.10071	7	6	104	103	QA	-1
RELL1	0.100731	6	5	44	44	QA	-1
FOXA1	0.100812	3	3	6	6	ER	0.00178664
TNFSF14	0.10087	1	1	12	12	ER	4.22e-06
FCAMR	0.101029	5	5	68	68	QA	-1
DNAJC7	0.101087	3	3	11	11	ER	4.19e-06
RNF167	0.101095	4	3	6	6	ER	0.00102957
HNRNPUL1	0.101149	9	8	56	56	QA	-1
GALNT13	0.101151	7	6	53	52	QA	-1
TOP2A	0.101166	7	6	69	69	QA	-1
VIPAS39	0.101296	6	4	11	11	ER	5.1e-06
SH3BP1	0.101346	5	4	11	11	ER	2.8e-05
DRD1	0.101626	1	1	1	1	ER	0.101626
MPPED1	0.101626	1	1	1	1	ER	0.101626
C11orf82	0.101671	5	4	12	12	ER	4e-06
GRIK3	0.101923	7	7	9	9	ER	3.77e-05
PLAUR	0.101949	2	2	76	76	QA	-1
SLC24A2	0.101997	6	6	35	35	ER.A	-1
PDLIM7	0.10214	1	1	1	1	ER	0.10214
TDRD3	0.102174	8	8	94	94	QA	-1
FJX1	0.102294	1	1	3	3	ER	0.0100476
C17orf75	0.102395	2	2	43	43	QA	-1
SGSM1	0.102481	5	5	30	29	ER.A	-1
SEMA7A	0.102508	5	5	33	33	ER.A	-1
KLHL5	0.10258	6	5	19	19	ER	3.24e-10
DUOXA2	0.102596	2	2	164	82	QA	-1
C19orf12	0.102626	3	3	27	27	ER.A	-1
ZNF75A	0.102651	1	1	1	1	ER	0.102651
VPS39	0.102657	5	5	50	49	QA	-1
TTC6	0.102683	6	4	29	29	ER.A	-1
FBXO4	0.102725	2	2	37	37	ER.A	-1
DGKA	0.1028	9	9	61	60	QA	-1
CSPG4	0.102838	9	8	161	161	QA	-1
HGSNAT	0.102841	4	3	26	26	ER.A	-1
MAP3K8	0.103119	3	2	5	5	ER	0.00301698
NFKBID	0.103152	1	1	19	19	ER	3.13e-09
UBQLN3	0.103285	9	9	103	103	QA	-1
HSP90AA1	0.103372	2	1	1	1	ER	0.103372
MMACHC	0.103506	4	3	30	30	ER.A	-1
PROL1	0.103534	1	1	29	28	ER.A	-1
CTSK	0.103734	6	5	43	42	QA	-1
CNN1	0.104033	5	4	45	45	QA	-1
CHMP1A	0.104117	2	2	4	4	ER	0.0139392
SEPHS2	0.104228	1	1	18	18	ER	1.26e-08
RELA	0.10428	7	6	17	17	ER	1.87e-08
MEDAG	0.104346	1	1	8	8	ER	0.000156353
CLDN17	0.104428	1	1	5	5	ER	0.0026973
PITHD1	0.104509	2	2	2	2	ER	0.104509
ARNT	0.104519	2	2	2	2	ER	0.104519
RPUSD2	0.10453	4	4	34	34	ER.A	-1
KRT35	0.10465	6	6	15	14	ER	1.8e-07
TP53INP2	0.104674	1	1	8	8	ER	0.000468364
EPC1	0.10472	11	11	34	33	ER.A	-1
PBX2	0.104747	1	1	31	31	ER.A	-1
ITGA4	0.104766	10	9	128	128	QA	-1
OMA1	0.104772	6	6	57	56	QA	-1
SPINK13	0.104786	2	2	10	10	ER	4.91e-05
HRASLS5	0.105339	5	5	7	7	ER	1.55e-05
IL18BP	0.105355	2	2	33	33	ER.A	-1
C16orf70	0.105512	4	3	14	14	ER	1.95e-07
EXOG	0.105632	6	5	18	18	ER	4.65e-09
FASTK	0.105659	2	2	10	10	ER	7.4e-06
KLHL10	0.105661	6	6	27	27	ER.A	-1
DONSON	0.105731	7	6	87	86	QA	-1
XBP1	0.105888	2	2	33	33	ER.A	-1
JAGN1	0.106264	1	1	2	2	ER	0.106264
TDP1	0.106358	2	2	4	4	ER	0.0141403
TRPM7	0.1064	5	5	13	13	ER	1.25e-07
TTBK2	0.106401	1	1	1	1	ER	0.106401
MYH3	0.106531	19	17	47	47	QA	-1
ATG2B	0.106586	18	12	223	219	QA	-1
DUSP11	0.106612	1	1	1	1	ER	0.106612
TMEM117	0.106612	2	1	1	1	ER	0.106612
IMMT	0.106639	7	7	125	125	QA	-1
EID2B	0.106655	2	2	10	10	ER	1.03e-05
GRIK5	0.106684	4	3	44	44	QA	-1
DHX30	0.106688	5	5	14	14	ER	3.51e-07
MYB	0.106744	7	6	68	67	QA	-1
ARL11	0.106746	1	1	1	1	ER	0.106746
TAP2	0.10681	1	1	2	2	ER	0.10681
OR51E2	0.106828	3	3	14	14	ER	6.58e-07
TBATA	0.106857	7	7	103	103	QA	-1
GABRA1	0.106918	1	1	1	1	ER	0.106918
CLEC4A	0.106983	4	4	36	36	ER.A	-1
SCTR	0.10709	7	7	22	22	ER.A	-1
NUDT8	0.107409	4	4	12	12	ER	1.03e-05
CDC20	0.107438	2	2	13	13	ER	2.38e-06
SEC22C	0.107444	4	4	14	14	ER	7.32e-08
GCK	0.107494	4	3	27	27	ER.A	-1
ZNF71	0.107547	2	1	24	24	ER.A	-1
FAM151B	0.107601	2	2	2	2	ER	0.107601
IBTK	0.107637	9	9	74	74	QA	-1
ATXN1	0.107647	4	4	22	22	ER.A	-1
GPR155	0.107903	4	4	13	13	ER	2.94e-06
MLTK	0.107981	8	7	173	171	QA	-1
TLR3	0.108197	5	5	55	55	QA	-1
ARRB2	0.108464	1	1	1	1	ER	0.108464
TMPRSS4	0.108519	3	2	2	2	ER	0.108519
DUOX1	0.108596	23	19	199	195	QA	-1
SMDT1	0.108635	2	2	11	11	ER	3.81e-06
NFKBIA	0.10874	2	2	3	3	ER	0.00812201
ARMC12	0.108772	8	8	48	48	QA	-1
RPGRIP1	0.108844	11	10	39	39	ER.A	-1
LRPPRC	0.108846	2	2	2	2	ER	0.108846
CDK5RAP3	0.108971	6	5	58	58	QA	-1
PRKD2	0.109077	9	8	100	92	QA	-1
TMEM217	0.109101	2	2	65	65	QA	-1
DDX25	0.109178	1	1	1	1	ER	0.109178
TMEM182	0.109258	3	2	5	5	ER	0.000618742
FBXL4	0.109342	7	6	17	17	ER	3.61e-08
FUT7	0.10936	2	2	35	35	ER.A	-1
MRPL28	0.109451	2	2	26	26	ER.A	-1
MMAA	0.109452	1	1	1	1	ER	0.109452
BAIAP2	0.109596	1	1	1	1	ER	0.109596
LIPC	0.109623	5	5	55	55	QA	-1
PLEK2	0.109647	4	2	13	13	ER	9.37e-07
CPSF3L	0.109787	4	3	3	3	ER	0.0354185
POLB	0.109843	1	1	5	5	ER	0.00268176
RXFP1	0.109881	6	5	6	6	ER	0.000216543
YJEFN3	0.109923	1	1	1	1	ER	0.109923
ARPC1B	0.109991	6	4	30	30	ER.A	-1
TAF5L	0.110037	3	3	43	43	QA	-1
ZNF804B	0.110152	8	7	73	72	QA	-1
FBXO47	0.11029	4	4	45	45	QA	-1
ZNF429	0.110316	1	1	2	2	ER	0.110316
SARS	0.110356	1	1	1	1	ER	0.110356
YKT6	0.110412	3	3	15	15	ER	2.7e-07
COX5A	0.110418	1	1	13	13	ER	1.67e-06
CNR2	0.110624	2	1	2	2	ER	0.110624
SMAD2	0.110628	2	2	2	2	ER	0.110628
MANEAL	0.110643	2	2	2	2	ER	0.110643
EFEMP1	0.110649	4	4	8	8	ER	9.14e-05
ENPEP	0.110679	11	10	89	88	QA	-1
PRPSAP1	0.110784	5	2	4	4	ER	0.00193255
NKX2-8	0.110808	1	1	1	1	ER	0.110808
EVPL	0.110936	22	20	291	144	QA	-1
CBR1	0.110959	3	1	2	2	ER	0.110959
CTNNA2	0.110964	5	4	6	6	ER	0.000852714
APPBP2	0.111182	4	4	7	7	ER	0.00071783
USF1	0.111423	3	3	9	9	ER	6.79e-05
ZNF517	0.111545	8	8	49	49	QA	-1
FUT11	0.111712	6	6	51	51	QA	-1
HDLBP	0.111729	5	5	19	19	ER	8.62e-09
CANT1	0.111752	1	1	3	3	ER	0.0115808
ADAMTSL2	0.112092	1	1	2	2	ER	0.00620031
PRRC2C	0.112095	14	11	149	147	QA	-1
SOCS1	0.112111	2	2	7	7	ER	0.000904936
FOXJ1	0.11212	2	1	1	1	ER	0.11212
TMEM170A	0.112138	4	3	60	59	QA	-1
C1orf110	0.11215	6	6	30	30	ER.A	-1
PSMA3	0.112338	1	1	2	2	ER	0.112338
TRRAP	0.112397	19	16	30	30	ER.A	-1
ENTPD4	0.112427	14	13	115	115	QA	-1
SFRP2	0.112538	3	3	12	12	ER	3.64e-07
PCDHGB3	0.112587	10	10	267	265	QA	-1
ZADH2	0.112704	5	5	89	89	QA	-1
GJB2	0.112802	7	7	23	23	ER.A	-1
REEP1	0.112806	1	1	2	2	ER	0.112806
MACC1	0.112815	6	6	139	138	QA	-1
PVRL3	0.112885	7	6	30	30	ER.A	-1
TRPM4	0.112974	16	13	100	96	QA	-1
B4GALT3	0.112983	4	4	11	11	ER	2.57e-05
OR4K5	0.113232	3	3	40	40	ER.A	-1
OR10S1	0.113309	3	2	36	36	ER.A	-1
SLC26A3	0.113458	10	10	14	14	ER	1.66e-07
MAZ	0.113529	2	1	1	1	ER	0.113529
SLC50A1	0.113704	1	1	5	5	ER	0.00896062
ZDHHC8	0.113834	6	5	42	42	QA	-1
KCNAB2	0.113902	4	4	6	6	ER	0.000436359
EMB	0.113929	6	6	11	11	ER	3.96e-06
LRCH1	0.114019	7	7	99	98	QA	-1
PRSS27	0.114144	1	1	1	1	ER	0.114144
TULP1	0.11427	3	3	16	16	ER	4.52e-08
EPHA5	0.114276	4	4	4	4	ER	0.00783681
ACAD8	0.114362	4	4	68	68	QA	-1
PLA2G2C	0.114589	1	1	1	1	ER	0.114589
CLCNKB	0.114606	6	6	154	152	QA	-1
COL21A1	0.11463	7	7	25	24	ER.A	-1
ZNF280D	0.114829	3	3	7	7	ER	0.0014587
TOX4	0.114861	4	4	4	4	ER	0.0110311
C1QTNF1	0.114877	3	3	24	24	ER.A	-1
COMMD2	0.114884	2	2	13	13	ER	3.71e-06
GPR132	0.11499	3	3	3	3	ER	0.034493
C12orf49	0.115141	1	1	1	1	ER	0.115141
ADAMTS20	0.115234	20	18	142	138	QA	-1
RNF40	0.115249	10	9	23	23	ER.A	-1
MICU3	0.115256	3	3	4	4	ER	0.00993891
MICALCL	0.115276	7	7	110	109	QA	-1
QRFPR	0.11529	6	5	99	99	QA	-1
OR6C1	0.115353	4	4	12	12	ER	2.76e-06
DDX10	0.115365	9	8	37	37	ER.A	-1
MYOG	0.115388	3	3	6	6	ER	0.00103163
CXCL1	0.11544	1	1	9	9	ER	2.62e-05
TBK1	0.115459	1	1	58	58	QA	-1
ATP8B1	0.115519	7	6	14	14	ER	4.09e-07
ZNF439	0.115565	5	4	4	4	ER	0.0128019
HP1BP3	0.11568	3	3	3	3	ER	0.0172754
MTHFSD	0.115707	4	2	13	13	ER	1.36e-06
SUCNR1	0.115726	2	1	5	5	ER	0.00373872
CLTC	0.115733	5	4	8	8	ER	0.00067459
PPP3CC	0.115763	4	4	30	30	ER.A	-1
KDM4E	0.11601	1	1	76	76	QA	-1
RAP1GAP2	0.116085	3	3	23	23	ER.A	-1
OR2V2	0.116118	3	3	18	18	ER	1.96e-09
GRTP1	0.116134	3	3	35	34	ER.A	-1
TUBGCP6	0.116134	5	4	51	51	QA	-1
ALG3	0.116268	3	3	53	53	QA	-1
KLHL32	0.11649	4	4	21	21	ER.A	-1
SCARA3	0.116545	3	3	50	50	QA	-1
BAX	0.116703	6	6	14	14	ER	2.32e-06
KRTAP13-2	0.116718	2	2	62	61	QA	-1
NFKBIB	0.116803	2	2	10	10	ER	0.000122148
PLAT	0.117015	6	5	14	14	ER	6.16e-07
RNF6	0.117089	6	4	8	8	ER	0.000355662
FBXW4	0.117294	1	1	59	59	QA	-1
CTDSPL	0.117326	2	2	45	45	QA	-1
OTUD6B	0.117338	2	2	7	7	ER	0.000973034
B3GNT4	0.117384	3	3	35	35	ER.A	-1
WIPF2	0.117507	4	3	21	21	ER.A	-1
MTUS1	0.11762	22	21	226	224	QA	-1
PDE4D	0.117759	2	1	1	1	ER	0.117759
RRAD	0.117759	1	1	1	1	ER	0.117759
LRP5L	0.117811	7	5	44	43	QA	-1
SLC25A18	0.117823	2	2	8	8	ER	0.000685387
PNPLA5	0.117917	4	3	44	43	QA	-1
WBSCR27	0.117926	3	2	5	5	ER	0.00897736
CKAP4	0.117937	8	5	52	52	QA	-1
ROR1	0.117985	9	8	29	29	ER.A	-1
CD200R1	0.118123	1	1	5	5	ER	0.0107063
WDR7	0.11826	8	8	36	36	ER.A	-1
KLHL17	0.11826	12	11	73	72	QA	-1
CLRN1	0.118284	4	4	53	52	QA	-1
TACSTD2	0.118297	1	1	2	2	ER	0.118297
OR2V1	0.118326	1	1	1	1	ER	0.118326
CCDC30	0.118358	4	4	103	103	QA	-1
OR4D1	0.118404	4	4	38	38	ER.A	-1
CREB3L4	0.118499	6	4	13	12	ER	5.82e-06
OTUD4	0.118512	9	9	71	71	QA	-1
NR1H2	0.118538	1	1	1	1	ER	0.118538
RLN3	0.118809	2	2	11	11	ER	1.24e-05
PTPRCAP	0.11912	1	1	1	1	ER	0.11912
OR2W1	0.119178	1	1	44	44	QA	-1
AQP11	0.119329	2	2	3	3	ER	0.00749307
TDRKH	0.119397	8	7	14	14	ER	9.18e-08
C19orf26	0.119429	2	2	43	43	QA	-1
SOX17	0.119577	2	2	3	3	ER	0.0385639
DCAF4	0.11965	8	8	87	86	QA	-1
CETN3	0.119674	5	5	82	82	QA	-1
BIRC6	0.119679	28	24	155	150	QA	-1
RSAD1	0.119786	4	4	7	7	ER	0.00123809
PNMA1	0.119856	3	3	8	8	ER	7.77e-05
ZNF667	0.119857	2	2	15	15	ER	2.33e-06
WNT8A	0.120134	3	2	3	3	ER	0.032343
ZDHHC18	0.120291	2	2	18	18	ER	3e-07
SULT1E1	0.120396	3	2	2	2	ER	0.120396
LIPJ	0.120411	3	2	14	14	ER	3.08e-07
MRPL13	0.120468	1	1	3	3	ER	0.0129375
JAKMIP3	0.120568	10	8	77	60	QA	-1
CC2D1A	0.120698	12	11	151	150	QA	-1
C5orf30	0.120778	2	2	7	7	ER	0.00190302
C10orf32	0.120881	1	1	1	1	ER	0.120881
MTX2	0.12094	2	2	4	4	ER	0.0102387
ASIC2	0.121017	3	3	59	59	QA	-1
PAMR1	0.121144	16	13	59	58	QA	-1
C11orf42	0.121172	6	5	9	9	ER	0.000327791
KRT79	0.121174	9	9	112	112	QA	-1
REC8	0.121191	5	5	28	28	ER.A	-1
QTRT1	0.121207	3	2	2	2	ER	0.0371252
CCL22	0.121212	1	1	1	1	ER	0.121212
MAK16	0.121228	1	1	1	1	ER	0.121228
TOR1B	0.121239	4	4	14	14	ER	1.98e-06
ADSSL1	0.121323	9	9	33	33	ER.A	-1
NMNAT3	0.121446	2	2	2	2	ER	0.121446
PPP2R5B	0.121446	1	1	1	1	ER	0.121446
ADAMTS9	0.121563	21	19	158	157	QA	-1
S1PR4	0.121611	6	6	37	36	ER.A	-1
HCFC2	0.121629	3	3	6	6	ER	0.0019018
NABP1	0.121669	1	1	1	1	ER	0.121669
ACSS3	0.122147	7	7	98	97	QA	-1
HTN3	0.122197	1	1	2	2	ER	0.122197
ALDH4A1	0.122218	6	5	29	29	ER.A	-1
KIF16B	0.122304	13	12	117	117	QA	-1
SPAM1	0.122534	4	3	4	4	ER	0.0115826
SIGLEC11	0.12256	3	2	37	37	ER.A	-1
KRTAP4-9	0.12275	1	1	20	20	ER	2.8e-10
ENKD1	0.122867	4	3	39	39	ER.A	-1
FAM136A	0.123049	1	1	49	49	QA	-1
FCRLA	0.123066	6	6	83	82	QA	-1
ZNF143	0.123095	6	5	32	32	ER.A	-1
FARSA	0.123196	5	4	43	43	QA	-1
ADAP1	0.123216	1	1	5	5	ER	0.00499501
SCAND3	0.123245	8	8	156	108	QA	-1
SLPI	0.123522	1	1	58	58	QA	-1
FAM13A	0.123553	10	6	31	31	ER.A	-1
OR56B3P	0.123626	2	2	2	2	ER	0.123626
PPP1R3A	0.123659	7	7	141	140	QA	-1
GABRA2	0.123852	3	3	23	23	ER.A	-1
MYBPC2	0.123968	13	12	101	99	QA	-1
CMTM1	0.123983	2	2	28	28	ER.A	-1
ZNF521	0.124036	9	8	47	47	QA	-1
LDHAL6A	0.12405	5	5	14	14	ER	1.38e-06
STAT4	0.124061	5	5	71	71	QA	-1
PPP1R7	0.124074	3	3	3	3	ER	0.0481556
RDH5	0.124083	5	4	30	30	ER.A	-1
ZNF99	0.124112	2	2	6	3	ER	0.0110612
ZNF493	0.12418	1	1	9	9	ER	6.68e-05
C2orf44	0.124235	6	5	61	61	QA	-1
DNAJC24	0.124298	2	2	76	76	QA	-1
XPO6	0.124349	8	8	55	55	QA	-1
TMEM141	0.12442	2	2	7	7	ER	0.00171131
SP140L	0.124634	4	4	4	4	ER	0.00482736
KHDC1	0.124691	5	5	29	29	ER.A	-1
TTF2	0.124788	13	12	56	56	QA	-1
KIF5B	0.124819	1	1	1	1	ER	0.124819
LTB4R	0.124882	4	4	17	17	ER	5.79e-08
TBCB	0.124934	2	2	46	46	QA	-1
GTF3C3	0.125	6	6	11	11	ER	1.41e-05
SLC2A4	0.125068	6	6	79	79	QA	-1
FAM83A	0.125169	4	4	92	92	QA	-1
ZNF138	0.125202	1	1	14	14	ER	3.76e-06
THAP5	0.125215	3	3	37	37	ER.A	-1
ATP6V1H	0.125274	3	3	18	18	ER	2.74e-08
SFSWAP	0.12548	8	8	60	59	QA	-1
UPK3A	0.125564	5	4	80	80	QA	-1
DCTN5	0.125743	1	1	1	1	ER	0.125743
ST18	0.125799	8	6	72	72	QA	-1
WDR89	0.126196	7	7	37	37	ER.A	-1
TMC5	0.126202	10	8	45	45	QA	-1
OTOP1	0.12629	3	3	24	24	ER.A	-1
IKZF4	0.126306	4	4	39	38	ER.A	-1
OTUD7B	0.126324	7	6	58	58	QA	-1
JUNB	0.126331	1	1	1	1	ER	0.126331
APOPT1	0.126384	1	1	1	1	ER	0.126384
ZNF783	0.126471	4	2	28	28	ER.A	-1
SAMD4B	0.1265	8	6	128	128	QA	-1
H6PD	0.126511	7	4	11	11	ER	6.86e-06
CCDC132	0.126511	7	5	32	32	ER.A	-1
LPO	0.126604	14	11	36	36	ER.A	-1
RGS19	0.126614	3	3	15	15	ER	1.64e-07
PRKCE	0.126643	5	5	48	48	QA	-1
MX1	0.126686	9	8	72	71	QA	-1
ZNF781	0.126719	2	2	6	6	ER	0.00208051
NCSTN	0.126751	9	7	134	133	QA	-1
LGALS3BP	0.126756	2	2	26	26	ER.A	-1
HCRTR1	0.126804	6	6	227	224	QA	-1
IL17RA	0.126811	8	8	36	36	ER.A	-1
KIAA0232	0.126822	14	12	92	90	QA	-1
RNF180	0.12684	4	4	22	22	ER.A	-1
SALL4	0.126845	7	7	14	14	ER	8.06e-07
CRISPLD1	0.12699	5	5	47	47	QA	-1
CDC37	0.12711	1	1	1	1	ER	0.12711
CD22	0.127222	4	4	51	50	QA	-1
FRK	0.12729	7	7	37	37	ER.A	-1
SEMA6B	0.127312	3	2	15	15	ER	2.26e-08
SHC2	0.12747	5	5	6	6	ER	0.00666675
TRAPPC4	0.127616	1	1	1	1	ER	0.127616
NCOA3	0.127676	10	10	75	71	QA	-1
PIAS2	0.127679	7	5	13	13	ER	3.3e-06
VCAM1	0.127705	4	4	9	9	ER	0.000130459
ZNF337	0.12772	16	16	146	143	QA	-1
CCR8	0.127834	3	3	13	13	ER	5.24e-06
CSRP3	0.127883	4	4	5	5	ER	0.00252807
CYLC2	0.127987	5	5	46	46	QA	-1
OR10P1	0.128113	4	4	7	7	ER	0.000493291
CHP2	0.128134	4	4	105	104	QA	-1
BBS9	0.128198	12	12	134	134	QA	-1
PAAF1	0.128238	4	3	42	42	QA	-1
LRR1	0.128367	4	3	4	4	ER	0.013444
VGF	0.128451	2	2	36	36	ER.A	-1
OR56A1	0.128467	1	1	1	1	ER	0.128467
SLC9A4	0.1286	7	7	55	55	QA	-1
RP11-144F15.1	0.128603	1	1	1	1	ER	0.128603
CYP1A2	0.128829	11	11	80	79	QA	-1
KIAA0947	0.128893	13	12	120	118	QA	-1
RPS6KA5	0.128925	4	2	51	49	QA	-1
GALNT18	0.128941	10	7	102	102	QA	-1
PIGV	0.129091	3	3	141	140	QA	-1
BTBD16	0.129159	5	5	22	22	ER.A	-1
ARHGAP32	0.129309	15	13	75	75	QA	-1
BTNL9	0.129321	4	3	3	3	ER	0.0154643
AIF1L	0.129365	2	2	36	36	ER.A	-1
PODXL2	0.129386	7	7	21	21	ER.A	-1
GPR3	0.129495	5	4	15	15	ER	6.79e-08
TNFRSF9	0.129514	3	3	13	13	ER	1.21e-06
CASP7	0.129518	3	3	32	32	ER.A	-1
KCNJ1	0.129587	7	5	33	33	ER.A	-1
RUNDC1	0.129837	8	7	67	67	QA	-1
NME9	0.129859	1	1	54	53	QA	-1
MTMR14	0.129885	8	7	60	60	QA	-1
COG8	0.129892	4	4	13	13	ER	5.25e-07
C9	0.129916	2	2	23	23	ER.A	-1
EIF2S1	0.129919	1	1	10	10	ER	2.56e-06
PDSS2	0.129946	1	1	14	14	ER	2.42e-06
METTL2B	0.130212	2	2	15	15	ER	1.69e-06
NEDD4L	0.130243	3	3	36	36	ER.A	-1
SCN4A	0.13028	12	11	94	94	QA	-1
NDUFA12	0.130285	2	2	3	3	ER	0.040721
STOML1	0.130446	2	1	1	1	ER	0.130446
ITIH5	0.130478	11	10	78	78	QA	-1
COG3	0.130619	5	5	38	38	ER.A	-1
IL2RB	0.130639	1	1	1	1	ER	0.130639
SQRDL	0.130709	5	5	62	61	QA	-1
SLC52A2	0.130859	1	1	6	6	ER	0.000649301
SYNE3	0.130905	10	7	111	110	QA	-1
NUGGC	0.131038	3	3	11	11	ER	1.63e-05
CD180	0.131039	11	10	183	182	QA	-1
TMEM154	0.131054	2	2	61	61	QA	-1
BAG2	0.131087	1	1	58	58	QA	-1
HYAL2	0.13125	5	4	14	13	ER	1.38e-06
DNASE1	0.131268	8	7	19	19	ER	5.68e-09
TARBP1	0.131335	7	7	66	66	QA	-1
MTHFD2	0.131641	1	1	1	1	ER	0.131641
DAW1	0.131667	4	4	24	24	ER.A	-1
FAM184A	0.131785	11	10	82	82	QA	-1
BMP1	0.131798	8	8	37	37	ER.A	-1
ZNF823	0.131828	4	4	4	4	ER	0.0169369
DDRGK1	0.131844	2	2	20	20	ER	1.22e-10
KCTD21	0.132075	3	2	7	7	ER	0.000858517
PCDHA11	0.132093	3	3	8	8	ER	0.000122166
TMEM59L	0.132232	4	3	25	25	ER.A	-1
SERPINA3	0.132264	6	5	58	58	QA	-1
TTLL1	0.132333	4	4	28	28	ER.A	-1
SCYL1	0.132356	8	7	17	17	ER	2.69e-09
ANGEL2	0.132507	3	3	12	12	ER	3.36e-06
AKR1A1	0.132548	6	6	16	16	ER	2.11e-08
SLC28A3	0.132553	4	4	9	9	ER	7.82e-05
TEX14	0.132676	10	10	77	77	QA	-1
CCT5	0.13268	3	3	5	5	ER	0.00436632
TOX3	0.132756	3	3	3	3	ER	0.0179519
TSEN15	0.132817	2	1	1	1	ER	0.132817
GART	0.132863	11	11	295	227	QA	-1
PLA2G4F	0.132952	8	8	145	145	QA	-1
KRTAP26-1	0.133004	2	2	14	14	ER	2.1e-07
HAND1	0.133034	1	1	71	71	QA	-1
TATDN2	0.133038	8	7	37	37	ER.A	-1
BDH2	0.13306	4	3	35	35	ER.A	-1
ANKRD27	0.133204	12	12	59	58	QA	-1
PPP1R3C	0.133214	5	4	16	16	ER	5.69e-08
TMEM64	0.133268	2	2	8	8	ER	0.000141818
PCBD2	0.13351	1	1	6	6	ER	0.000734996
ADAM10	0.133546	1	1	1	1	ER	0.133546
ZSCAN20	0.133561	14	12	27	27	ER.A	-1
CRADD	0.133595	3	3	30	30	ER.A	-1
STUB1	0.133641	5	4	4	4	ER	0.00484635
PYCARD	0.133659	1	1	10	10	ER	2.55e-05
LARP1B	0.133903	4	3	13	13	ER	9.96e-07
RNF5	0.133903	2	2	2	2	ER	0.034443
NEDD4	0.133947	15	14	176	173	QA	-1
OLAH	0.133962	2	2	85	84	QA	-1
FAM3D	0.1341	1	1	1	1	ER	0.1341
RSPO4	0.134156	3	2	2	2	ER	0.0309665
POU4F2	0.134188	2	2	3	3	ER	0.00742151
ENTHD1	0.134207	4	4	29	29	ER.A	-1
ADAM12	0.134224	7	7	50	48	QA	-1
C8orf22	0.134246	1	1	1	1	ER	0.134246
SEPP1	0.134275	6	6	104	101	QA	-1
LPAR3	0.134293	4	2	12	12	ER	6.29e-06
C2	0.134336	5	4	6	6	ER	0.00152903
ZNF772	0.134555	12	10	89	89	QA	-1
LYPD6	0.134759	2	2	18	18	ER	7.55e-09
ZNF223	0.134878	7	7	60	60	QA	-1
PPP1R12C	0.135076	5	5	211	207	QA	-1
OR4N2	0.135314	3	3	47	47	QA	-1
GOT2	0.135382	3	2	3	3	ER	0.0356919
RPAIN	0.135581	1	1	1	1	ER	0.135581
AGPAT2	0.135755	7	6	20	20	ER	5.77e-10
CLCN7	0.135847	6	3	15	14	ER	1.05e-06
UEVLD	0.135899	5	5	69	64	QA	-1
KCNK15	0.136035	1	1	1	1	ER	0.136035
CXCR1	0.136125	3	3	82	81	QA	-1
ERAP2	0.136166	9	9	60	60	QA	-1
ZC3H10	0.136193	2	1	1	1	ER	0.136193
ZNF501	0.136261	2	2	2	2	ER	0.0336101
SNTA1	0.136302	4	3	4	4	ER	0.00286062
ATP13A3	0.136385	9	9	71	71	QA	-1
PROKR1	0.136544	5	5	7	7	ER	0.00162711
PNISR	0.136554	5	5	29	29	ER.A	-1
IL36A	0.136608	2	2	4	4	ER	0.00524154
ASPH	0.136671	2	1	1	1	ER	0.136671
PLAC9	0.136781	1	1	1	1	ER	0.136781
FAIM2	0.136954	1	1	44	44	QA	-1
RASIP1	0.137095	2	1	6	6	ER	0.00120296
ARHGAP15	0.137157	5	4	12	12	ER	4.6e-06
TMEM119	0.137169	1	1	27	27	ER.A	-1
MYBPHL	0.137174	10	10	46	46	QA	-1
PVRL1	0.137285	3	3	11	11	ER	4.73e-06
EIF3L	0.137547	1	1	1	1	ER	0.137547
DDX60	0.137575	9	8	44	44	QA	-1
CNTNAP5	0.137746	14	11	87	87	QA	-1
CYB5D2	0.137795	3	3	69	69	QA	-1
FUK	0.137812	12	12	119	118	QA	-1
TMEM130	0.137947	4	4	53	53	QA	-1
PLEKHA4	0.137964	7	7	60	60	QA	-1
PHC1	0.138069	1	1	3	3	ER	0.0160208
RPL13	0.138189	2	2	30	30	ER.A	-1
HIST1H2BF	0.138214	2	2	2	2	ER	0.0385433
ACOXL	0.138256	7	5	76	76	QA	-1
ZNF18	0.138281	1	1	60	60	QA	-1
MECR	0.138491	5	5	110	109	QA	-1
CEP78	0.138568	1	1	22	22	ER.A	-1
FSHB	0.13861	1	1	21	21	ER.A	-1
TMEM175	0.13875	11	9	111	110	QA	-1
ALPK3	0.1389	16	15	70	69	QA	-1
PIK3R6	0.138907	2	2	10	10	ER	5.16e-05
PRKAR2A	0.138934	1	1	6	6	ER	0.000771648
OR1L8	0.13894	1	1	42	42	QA	-1
GTF2I	0.138947	1	1	1	1	ER	0.138947
KCNN1	0.139026	1	1	1	1	ER	0.139026
CXCL10	0.139047	1	1	1	1	ER	0.139047
HKDC1	0.139052	11	9	140	138	QA	-1
MYLPF	0.139119	3	3	22	22	ER.A	-1
FUBP3	0.139148	3	3	29	29	ER.A	-1
PIGQ	0.139251	6	6	17	17	ER	2.58e-08
PPP1R21	0.139266	10	10	135	133	QA	-1
SGOL1	0.139353	1	1	1	1	ER	0.139353
ZBTB8A	0.139449	4	4	26	26	ER.A	-1
CYB561	0.139463	2	2	8	8	ER	0.000255391
AK7	0.139495	11	8	36	36	ER.A	-1
A4GALT	0.139498	1	1	1	1	ER	0.139498
TRIB1	0.139612	2	2	16	16	ER	3.47e-07
RNASE9	0.139727	2	2	13	13	ER	1.93e-06
CDK12	0.139736	7	7	27	27	ER.A	-1
CERS5	0.139766	2	2	65	65	QA	-1
GIGYF2	0.139802	5	3	27	27	ER.A	-1
ETV4	0.139841	2	2	11	11	ER	5.26e-06
SLC25A40	0.139977	3	3	11	11	ER	4.71e-05
TCTE1	0.139982	12	11	64	64	QA	-1
SYT15	0.140008	7	5	20	20	ER	1.11e-08
RFTN1	0.140061	11	9	42	42	QA	-1
C20orf196	0.140166	2	2	74	74	QA	-1
MAP3K5	0.140211	14	13	112	111	QA	-1
KRT26	0.140267	5	5	29	29	ER.A	-1
CCL8	0.140341	1	1	21	21	ER.A	-1
FLYWCH1	0.140482	6	5	7	7	ER	0.000280957
NCKIPSD	0.140567	11	10	40	40	ER.A	-1
ZNF43	0.14068	4	4	84	84	QA	-1
KCTD18	0.140684	4	4	44	44	QA	-1
ANKS4B	0.140783	2	2	40	40	ER.A	-1
GRB7	0.140835	9	9	47	47	QA	-1
ZSCAN25	0.140861	3	3	3	3	ER	0.0508406
SNX33	0.140882	6	6	152	148	QA	-1
C9orf41	0.140894	3	3	3	3	ER	0.0197876
DBT	0.141142	5	5	33	33	ER.A	-1
EBNA1BP2	0.141192	2	2	6	6	ER	0.00326084
YWHAB	0.141195	3	3	58	58	QA	-1
NTN4	0.141225	12	10	92	92	QA	-1
MAPK12	0.141529	7	7	40	40	ER.A	-1
PTPN3	0.14185	5	4	88	88	QA	-1
UXS1	0.141907	2	2	7	7	ER	0.000110608
PLEKHH3	0.141909	1	1	1	1	ER	0.141909
TBC1D7	0.141909	1	1	1	1	ER	0.141909
STRC	0.141932	1	1	1	1	ER	0.141932
C11orf54	0.141943	3	3	9	9	ER	8.43e-05
HSDL1	0.142026	1	1	1	1	ER	0.142026
DNAI1	0.142035	14	12	207	205	QA	-1
CDH4	0.142131	15	12	137	136	QA	-1
FBXW9	0.142143	5	5	113	111	QA	-1
MICAL2	0.142308	22	20	286	275	QA	-1
GANAB	0.142533	7	6	27	27	ER.A	-1
MARS2	0.142604	5	3	15	15	ER	1.36e-07
CAPZA3	0.142856	3	3	9	9	ER	4.19e-05
ZBTB41	0.142906	5	5	20	20	ER	3.79e-09
MEP1A	0.142926	2	2	2	2	ER	0.031333
AP1G2	0.142933	8	7	103	103	QA	-1
ZNF684	0.143021	1	1	1	1	ER	0.143021
FAF1	0.143056	8	7	39	39	ER.A	-1
TBCD	0.143113	8	7	28	28	ER.A	-1
RPH3AL	0.143326	4	4	15	15	ER	3.66e-07
EPHA1	0.143357	11	10	26	26	ER.A	-1
ALPK1	0.143399	16	15	233	186	QA	-1
MAP3K12	0.143416	3	3	17	17	ER	5.27e-08
PNMAL2	0.143522	3	3	18	18	ER	9.63e-10
UBASH3B	0.143543	6	6	9	9	ER	8.87e-05
SOX11	0.14358	1	1	1	1	ER	0.14358
TMTC4	0.143619	7	7	72	71	QA	-1
ADRB2	0.143657	2	2	13	13	ER	9.23e-07
ISL2	0.143702	1	1	15	15	ER	2.73e-07
NPEPL1	0.143747	3	2	6	6	ER	0.00308318
MED29	0.143962	1	1	29	29	ER.A	-1
VIPR1	0.144003	4	4	45	45	QA	-1
RNASEL	0.144213	5	5	90	53	QA	-1
ETNPPL	0.144256	3	2	17	17	ER	6.87e-09
ST6GALNAC2	0.144444	7	5	7	7	ER	0.000570496
IL24	0.144484	2	2	65	65	QA	-1
ZNF366	0.144597	8	6	41	41	QA	-1
C9orf50	0.144623	6	5	38	38	ER.A	-1
MEPE	0.144949	1	1	1	1	ER	0.144949
FPR2	0.144997	3	3	24	24	ER.A	-1
HIVEP2	0.145024	15	12	50	50	QA	-1
FLT3LG	0.145095	1	1	1	1	ER	0.145095
DYRK4	0.145195	4	4	32	32	ER.A	-1
PHLPP2	0.145198	15	15	154	153	QA	-1
HR	0.145393	12	12	68	68	QA	-1
BTBD17	0.145415	1	1	1	1	ER	0.145415
NEK3	0.145439	2	2	17	17	ER	6.67e-08
OR8H1	0.145486	1	1	1	1	ER	0.145486
UBXN7	0.145486	1	1	1	1	ER	0.145486
DAAM2	0.145683	14	12	167	163	QA	-1
MFNG	0.145824	3	2	16	16	ER	1.18e-07
MCAT	0.145839	3	3	48	48	QA	-1
NHLRC1	0.146038	2	2	2	2	ER	0.0386304
DUXA	0.146125	4	4	69	68	QA	-1
AACS	0.146152	12	11	124	123	QA	-1
SYT6	0.14624	10	9	26	25	ER.A	-1
ATF4	0.14644	3	3	5	5	ER	0.00358168
KCNN2	0.146561	2	2	2	2	ER	0.0411427
SHMT2	0.146741	5	5	14	14	ER	1.21e-06
EPHB3	0.146895	5	5	20	20	ER	4.38e-10
IL1F10	0.147011	1	1	1	1	ER	0.147011
MMP17	0.147012	4	4	26	26	ER.A	-1
AQR	0.147251	10	10	12	12	ER	4.6e-06
ARHGAP44	0.14726	3	3	3	3	ER	0.0274238
VASH1	0.147339	1	1	1	1	ER	0.147339
FAM180A	0.14735	4	3	23	23	ER.A	-1
RXFP2	0.147399	6	5	100	100	QA	-1
AGO4	0.147484	1	1	1	1	ER	0.147484
ADPRHL1	0.147495	7	7	80	80	QA	-1
FAM162A	0.147513	2	1	1	1	ER	0.147513
HNRNPDL	0.147513	1	1	1	1	ER	0.147513
DLK1	0.147529	2	2	51	51	QA	-1
MEF2D	0.147566	3	3	3	3	ER	0.00996756
HDAC1	0.147571	3	3	8	8	ER	1.03e-05
ZBTB1	0.147741	5	5	32	32	ER.A	-1
PDE7A	0.147986	1	1	1	1	ER	0.147986
LYSMD3	0.148058	3	3	17	17	ER	7.38e-09
PYDC2	0.148212	1	1	67	67	QA	-1
LECT1	0.148243	1	1	1	1	ER	0.148243
OR5H14	0.148243	1	1	1	1	ER	0.148243
IGF1	0.148424	1	1	10	10	ER	4.49e-05
CNTD2	0.148522	1	1	1	1	ER	0.148522
IFNW1	0.148555	3	3	44	44	QA	-1
LYVE1	0.148583	3	3	7	7	ER	0.000113737
TMCO5A	0.148639	3	3	55	55	QA	-1
KIF3A	0.148762	1	1	1	1	ER	0.148762
DCT	0.148829	11	9	40	40	ER.A	-1
BCKDHB	0.148874	3	3	55	55	QA	-1
CTRL	0.148976	3	3	6	6	ER	0.00115318
NEURL4	0.149218	12	11	70	69	QA	-1
TRANK1	0.149239	20	19	43	43	QA	-1
POLR3A	0.149242	9	8	15	15	ER	1.53e-07
CDX2	0.149275	1	1	1	1	ER	0.149275
CHRM3	0.149275	1	1	1	1	ER	0.149275
TNKS	0.149344	10	10	167	166	QA	-1
SMOX	0.149348	3	3	3	3	ER	0.0102521
GDA	0.149362	4	4	4	4	ER	0.00281782
MTR	0.149476	16	15	63	62	QA	-1
UGT2B7	0.14957	3	3	7	7	ER	0.000486543
WDTC1	0.149572	4	4	72	72	QA	-1
TNFRSF10B	0.149649	2	2	2	2	ER	0.0520518
FAM209A	0.149829	1	1	1	1	ER	0.149829
HTR5A-AS1	0.149829	1	1	1	1	ER	0.149829
SNF8	0.149829	1	1	1	1	ER	0.149829
GLYATL2	0.150014	2	2	5	5	ER	0.00209764
GPC2	0.150105	2	1	1	1	ER	0.150105
PPAPDC3	0.150105	1	1	1	1	ER	0.150105
PSPH	0.150154	1	1	6	6	ER	0.00193057
OR5F1	0.150158	2	2	39	39	ER.A	-1
FUT1	0.15019	4	4	11	11	ER	2.98e-05
RAB3D	0.150229	4	4	8	8	ER	0.000151395
ABLIM3	0.150234	12	12	64	64	QA	-1
SSBP4	0.150476	2	1	1	1	ER	0.150476
ATP11A	0.150519	13	12	129	128	QA	-1
WDR4	0.150544	4	4	15	15	ER	1.93e-07
FRRS1	0.150564	5	5	161	160	QA	-1
NPAT	0.150726	15	14	116	115	QA	-1
PCDHAC2	0.150728	12	12	86	84	QA	-1
NT5C	0.150771	1	1	1	1	ER	0.150771
ZFP90	0.150778	4	3	5	5	ER	0.0021917
COL4A2	0.15082	1	1	1	1	ER	0.15082
DEFB1	0.150855	3	3	19	18	ER	2.67e-09
GPR56	0.150993	7	6	67	67	QA	-1
POLD2	0.151085	5	5	87	86	QA	-1
DMRT3	0.15115	7	7	112	111	QA	-1
CYBA	0.151161	1	1	1	1	ER	0.151161
E2F3	0.151161	1	1	1	1	ER	0.151161
AURKA	0.151168	1	1	1	1	ER	0.151168
SH2D6	0.151168	1	1	1	1	ER	0.151168
LGALS9	0.151368	2	1	36	34	ER.A	-1
EPX	0.15143	3	3	40	40	ER.A	-1
DEFB132	0.151464	1	1	16	16	ER	5.69e-07
TTC18	0.151503	4	4	18	18	ER	3.65e-08
GPATCH1	0.151519	8	8	148	134	QA	-1
BTLA	0.151535	1	1	1	1	ER	0.151535
AMDHD2	0.15156	10	7	41	41	QA	-1
CRY1	0.151879	7	7	27	27	ER.A	-1
HSD3B2	0.151934	1	1	1	1	ER	0.151934
FAM195A	0.151991	3	3	22	22	ER.A	-1
WDR35	0.152018	20	19	143	142	QA	-1
NHLRC3	0.152126	5	5	36	36	ER.A	-1
TOMM40L	0.152231	1	1	6	6	ER	0.00232279
JPH1	0.152263	5	5	61	61	QA	-1
MFAP4	0.152325	1	1	1	1	ER	0.152325
CLDN1	0.152471	2	2	16	16	ER	2.26e-07
SEC23A	0.15257	5	4	7	7	ER	0.00242445
PAF1	0.152582	7	7	64	64	QA	-1
ZMYND19	0.152618	1	1	1	1	ER	0.152618
NKX6-1	0.152766	2	2	2	1	ER	0.152766
STEAP4	0.152766	1	1	1	1	ER	0.152766
MRPL40	0.152838	1	1	16	16	ER	9.58e-08
KCNK1	0.152875	8	7	58	58	QA	-1
HERPUD2	0.152891	3	2	8	8	ER	0.000156017
TAPBP	0.152916	3	2	54	54	QA	-1
ZC2HC1C	0.152942	6	6	60	51	QA	-1
USP43	0.15314	11	10	73	73	QA	-1
SGMS1	0.153203	3	3	14	14	ER	2.01e-07
GP1BA	0.153217	5	5	17	17	ER	6.15e-09
M1AP	0.153238	10	10	87	87	QA	-1
TAS1R1	0.15332	9	9	125	112	QA	-1
DOCK9	0.153364	14	12	64	63	QA	-1
THBS1	0.15339	8	8	46	46	QA	-1
SPINK14	0.153409	1	1	3	3	ER	0.0284292
ONECUT1	0.153619	2	2	59	59	QA	-1
SLC44A5	0.153803	7	7	80	80	QA	-1
ARMC4	0.153874	2	2	3	3	ER	0.014819
CPEB3	0.153879	3	3	24	24	ER.A	-1
PWP2	0.153978	13	13	162	160	QA	-1
ATP1A1	0.15407	3	3	4	4	ER	0.0163564
STAM2	0.154145	2	2	4	4	ER	0.00547339
TF	0.154183	10	9	172	168	QA	-1
MSRA	0.154201	2	2	9	9	ER	3.21e-05
C7orf49	0.154291	1	1	31	31	ER.A	-1
RSPRY1	0.154325	3	3	14	14	ER	3.88e-06
SLC24A5	0.154427	2	2	14	13	ER	2.07e-06
C2orf54	0.154567	2	2	6	6	ER	0.000737225
PLBD1	0.154672	4	4	9	9	ER	4.78e-05
TCEB3	0.154793	6	5	86	85	QA	-1
ZNF816	0.154878	5	5	92	59	QA	-1
IQCC	0.154973	6	5	10	10	ER	6.37e-05
CCDC174	0.15504	3	3	49	48	QA	-1
SHANK2	0.155044	10	10	69	68	QA	-1
RPL5	0.155077	3	3	31	31	ER.A	-1
MMS19	0.155276	6	5	68	67	QA	-1
ABHD17B	0.155309	1	1	1	1	ER	0.155309
BPGM	0.155309	1	1	1	1	ER	0.155309
CCRL2	0.155309	1	1	1	1	ER	0.155309
CELF3	0.155309	1	1	1	1	ER	0.155309
MBD1	0.155348	2	2	2	2	ER	0.0381877
TSR1	0.155361	4	4	5	5	ER	0.0117593
OR4F15	0.155557	2	2	11	11	ER	5.59e-06
AKAP11	0.15557	15	12	93	91	QA	-1
FRMD5	0.155584	5	5	45	45	QA	-1
CHD6	0.155622	16	15	123	122	QA	-1
C14orf105	0.155675	4	2	120	120	QA	-1
SYNE4	0.155911	2	1	1	1	ER	0.155911
LUC7L	0.15593	2	2	75	75	QA	-1
DBNDD2	0.156113	1	1	7	7	ER	0.000155066
WTIP	0.156135	5	5	18	18	ER	4.93e-09
TST	0.156418	5	4	49	49	QA	-1
CCNK	0.156536	1	1	1	1	ER	0.156536
[truncated: 11,269 more rows]

## Sheet: Supplementary Table 2
Supplementary Table 2. CD-associated genes from SKAT-O analysis on AJ CD cohort using high impact rare variants
SetID	P.value	N.Marker.All	N.Marker.Test	MAC	m	Method.bin	MAP
NOD2	9.51e-14	25	25	255	243	QA	-1
MARCH7	5.99e-05	3	3	24	24	QA	-1
EPHX2	6.51e-05	13	13	106	101	QA	-1
HHLA2	0.000129211	2	2	67	67	QA	-1
EDRF1	0.000212477	10	10	119	119	QA	-1
ZNF329	0.000308626	4	4	117	116	QA	-1
ERICH1	0.000380332	1	1	21	21	QA	-1
CLPX	0.0004106	5	5	33	31	QA	-1
ASIC5	0.000485221	3	3	41	40	QA	-1
OR10J5	0.000603731	4	4	15	15	ER	2.23e-09
MCOLN2	0.000622348	3	3	16	16	ER	2.06e-09
SPAG5	0.000726941	9	9	30	30	ER.A	-1
PDGFD	0.000748494	5	5	59	58	QA	-1
WDR60	0.000821417	6	6	195	193	QA	-1
IRX1	0.000926858	2	2	7	7	ER	3.74e-05
LRRK2	0.000968246	26	26	210	210	QA	-1
KIR3DX1	0.000979337	3	3	15	15	ER	7.66e-10
CCT7	0.00102878	3	3	5	5	ER	0.00102878
TFCP2	0.00110516	3	3	4	4	ER	0.00110516
EVI5	0.00112935	7	6	127	127	QA	-1
ZNF597	0.00120177	2	2	30	30	QA	-1
CST4	0.00121643	1	1	41	41	QA	-1
ZNF556	0.00122434	3	3	7	7	ER	3.21e-05
TELO2	0.0012564	9	9	20	20	ER	2.15e-11
P4HTM	0.00125839	3	3	10	10	ER	5.33e-07
INTS7	0.00134887	3	3	8	8	ER	2.03e-06
C10orf91	0.00139878	2	2	16	16	ER	2.77e-09
TTLL7	0.00144077	5	5	25	25	ER.A	-1
INPP5D	0.00147656	5	5	33	33	ER.A	-1
RP4-576H24.4	0.00150744	3	3	14	14	ER	1.49e-08
HAUS2	0.00170759	1	1	45	45	QA	-1
RNF39	0.00171462	1	1	4	4	ER	0.00171462
LBX2	0.00177404	2	2	45	45	QA	-1
DUSP23	0.00201109	2	2	92	90	QA	-1
GET4	0.00203661	4	4	18	18	ER	1.22e-10
MED13	0.00206413	9	9	53	53	QA	-1
ERO1LB	0.00213606	2	2	19	19	ER	2.59e-12
DAB1	0.00220138	5	5	10	10	ER	2.23e-06
UTP18	0.00222269	2	2	19	19	ER	1.02e-11
C6orf58	0.0023187	3	3	103	103	QA	-1
SLC38A7	0.00232103	3	3	24	23	QA	-1
TOE1	0.00250689	3	3	12	12	ER	2.03e-07
SAMD9L	0.00261703	11	11	76	76	QA	-1
MIER1	0.00261846	2	2	17	17	ER	5.65e-11
THAP3	0.00275536	3	3	30	30	ER.A	-1
ZNF366	0.00280877	5	5	36	36	ER.A	-1
SSH1	0.00280998	6	6	11	11	ER	7.51e-07
PCOLCE2	0.00286931	7	7	68	68	QA	-1
NOL6	0.00298954	14	14	102	102	QA	-1
VCPKMT	0.0031908	1	1	4	4	ER	0.0031908
ZNF441	0.00328538	3	3	79	78	QA	-1
PLEKHA6	0.00342966	9	9	71	70	QA	-1
DLG4	0.00359458	3	3	56	55	QA	-1
EZH2	0.00381674	2	2	28	28	ER.A	-1
A1CF	0.0039099	3	3	7	7	ER	0.000118415
TM4SF1	0.0040614	3	3	5	5	ER	0.0040614
TRIB3	0.00415124	6	6	26	26	ER.A	-1
LNX2	0.00459992	5	5	10	10	ER	1.75e-06
MTMR7	0.00465177	6	6	22	22	ER.A	-1
RFX2	0.00468031	8	8	78	78	QA	-1
MRPL4	0.00471987	3	3	18	18	ER	1.34e-10
ACYP1	0.00488779	1	1	36	36	ER.A	-1
LRP2BP	0.00489581	4	4	5	5	ER	0.00489581
PCM1	0.00489752	9	9	46	46	QA	-1
RAD54L	0.00490096	6	6	24	24	ER.A	-1
ACSM1	0.00502018	4	4	104	102	QA	-1
ZNF7	0.00505195	5	5	19	19	ER	2.54e-10
KIAA1468	0.00517409	4	4	8	8	ER	2.89e-05
RSF1	0.00522548	5	5	27	27	ER.A	-1
SOS2	0.00529822	10	10	81	81	QA	-1
CLIP3	0.00532676	3	3	4	4	ER	0.00532676
RIPK1	0.00539584	3	3	21	21	ER.A	-1
DAGLA	0.00541405	3	3	11	11	ER	1.1e-06
ITGAV	0.00546853	8	8	26	26	ER.A	-1
MAST1	0.00548838	4	4	38	38	ER.A	-1
C8G	0.00556745	1	1	10	10	ER	2.13e-06
RASGRF2	0.00579315	7	7	37	37	ER.A	-1
MRPL16	0.0059973	3	3	37	37	ER.A	-1
CMIP	0.00604509	3	3	5	5	ER	0.00167361
SGSH	0.00632951	5	5	22	21	ER.A	-1
GJD2	0.00637786	4	4	5	5	ER	0.000758647
MYNN	0.00642088	2	2	5	5	ER	0.00149318
CATSPERB	0.0064475	6	6	21	21	ER.A	-1
MFI2	0.00646911	6	6	7	7	ER	5.14e-06
PEX13	0.00666563	2	2	32	32	ER.A	-1
KIF25	0.0066895	1	1	5	5	ER	0.000346205
C14orf166B	0.00673249	7	7	89	88	QA	-1
PRSS36	0.00673446	6	6	31	31	ER.A	-1
PIK3IP1	0.00691836	2	2	12	12	ER	2.23e-07
PPAPDC2	0.00694405	4	4	53	53	QA	-1
GHITM	0.00697105	4	4	6	6	ER	0.000159297
SSH3	0.00703098	8	8	140	139	QA	-1
UBE3B	0.0071994	7	7	84	84	QA	-1
ACVR1C	0.00720397	4	4	29	29	ER.A	-1
EAF1	0.00720727	2	2	88	87	QA	-1
C4orf29	0.0072489	5	5	49	49	QA	-1
NUMA1	0.00731475	21	21	85	64	QA	-1
PLA1A	0.00732661	5	5	15	15	ER	1.13e-08
CYP3A4	0.00758648	11	11	50	50	QA	-1
TLR4	0.00773279	4	4	24	24	ER.A	-1
CLN5	0.00788437	2	2	3	3	ER	0.00788437
ZNF517	0.00806948	8	8	40	40	ER.A	-1
MAMSTR	0.00838628	2	2	35	35	ER.A	-1
OPTC	0.00871002	4	4	21	21	ER.A	-1
PPP1R3D	0.00877616	1	1	10	10	ER	3.66e-06
ST6GAL2	0.00891231	5	4	63	61	QA	-1
ELMOD2	0.00906343	4	4	101	100	QA	-1
EGR2	0.00908888	3	3	35	35	ER.A	-1
TMEM147	0.00923424	3	3	3	3	ER	0.00923424
OR6C76	0.00928506	2	2	76	76	QA	-1
PATE1	0.00932148	1	1	9	9	ER	4.04e-06
IL33	0.00933001	2	2	11	11	ER	3.38e-06
GPR111	0.00934468	5	5	52	52	QA	-1
N6AMT2	0.00943582	2	2	21	21	ER.A	-1
EXOC4	0.00949204	9	9	32	32	ER.A	-1
FLCN	0.00960585	5	5	12	12	ER	1.18e-08
HEATR6	0.0098656	5	5	15	15	ER	7.63e-09
CDH17	0.00995127	5	5	14	14	ER	3.74e-09
CAMK1	0.0100266	5	5	38	38	ER.A	-1
TRMT61A	0.0100926	1	1	2	2	ER	0.0100926
NT5C3B	0.010195	2	2	88	88	QA	-1
ONECUT2	0.0102505	2	2	34	34	ER.A	-1
CDH24	0.0102851	3	3	11	11	ER	3.64e-06
NECAP1	0.0102966	4	4	5	5	ER	0.00117113
SRPK1	0.0104004	1	1	15	15	ER	7.27e-10
DUOX1	0.010446	19	19	173	169	QA	-1
OR2J3	0.010534	2	2	14	14	ER	5.36e-09
FCHO2	0.0106428	1	1	10	10	ER	3.21e-07
TRPV2	0.0106448	4	4	17	17	ER	1.22e-10
NPY2R	0.0106661	3	3	3	3	ER	0.0106661
CDKAL1	0.0106739	4	4	22	22	ER.A	-1
PRPF40A	0.0108561	5	4	5	5	ER	0.0013738
CD27	0.0109482	1	1	19	17	ER	3.55e-10
PSMB5	0.011006	4	4	8	8	ER	2.03e-05
EHMT1	0.0112287	6	6	59	59	QA	-1
OR6C6	0.0112791	4	4	78	78	QA	-1
GSK3B	0.0113103	3	3	3	3	ER	0.0113103
C16orf78	0.0113831	7	7	17	17	ER	1.47e-10
CCDC15	0.0114776	3	3	32	32	ER.A	-1
CCDC92	0.0114952	5	5	27	27	ER.A	-1
LAMP3	0.0114989	3	3	7	7	ER	3.17e-05
TUT1	0.0115762	2	2	19	19	ER	1e-10
TSPEAR	0.0117905	7	7	112	112	QA	-1
EID2B	0.0124542	2	2	10	10	ER	8.31e-07
FASTK	0.0125271	2	2	10	10	ER	6.01e-07
DNMT3B	0.0126943	4	4	79	79	QA	-1
KTI12	0.0127327	4	4	21	21	ER.A	-1
NQO2	0.0127435	2	2	15	15	ER	1e-09
DARS2	0.0127723	2	2	22	22	ER.A	-1
SEMA5A	0.0128741	10	10	102	102	QA	-1
TRIP4	0.0128827	4	4	9	9	ER	2.63e-06
CYTH2	0.0129715	2	2	2	2	ER	0.0129715
SLC25A20	0.0131847	3	3	51	51	QA	-1
KIAA1009	0.0131852	8	8	37	34	ER.A	-1
ZNF552	0.0132343	3	3	34	34	ER.A	-1
KIFC2	0.0132706	2	2	5	5	ER	0.00352065
ZNF513	0.0133481	2	2	4	4	ER	0.0133481
EVPLL	0.0133788	2	2	21	21	ER.A	-1
HSD17B8	0.0134573	1	1	3	3	ER	0.0134573
ADD2	0.0134727	4	4	82	81	QA	-1
ATP6V0D2	0.0134908	7	7	51	51	QA	-1
BOK	0.0135974	1	1	7	7	ER	7.36e-05
LXN	0.0137306	2	2	19	19	ER	1.42e-11
SH2D5	0.013744	3	3	84	84	QA	-1
CYB561A3	0.0138551	3	3	28	28	ER.A	-1
NCAPG2	0.0139182	4	4	44	44	QA	-1
LYST	0.0139588	26	26	153	150	QA	-1
SLC45A4	0.0140465	10	10	19	19	ER	7.75e-12
PARP15	0.0140698	3	3	55	54	QA	-1
CDH7	0.0142907	3	3	4	4	ER	0.00352275
SPATA33	0.0144633	2	2	5	5	ER	0.000878678
ABCA2	0.0145277	9	9	62	62	QA	-1
RAPGEF5	0.014591	3	3	4	4	ER	0.00334995
SKA1	0.0147328	1	1	8	8	ER	6.21e-06
KRTAP4-9	0.014848	1	1	16	16	ER	2.09e-10
RAB40C	0.0148585	4	4	11	11	ER	2.08e-08
LRRC8C	0.0149289	3	3	3	3	ER	0.0149289
MYO1H	0.0149806	13	13	126	126	QA	-1
CLRN3	0.0150338	3	3	8	8	ER	1.77e-05
FUOM	0.0151639	2	2	65	65	QA	-1
NLRP12	0.0151783	5	5	29	29	ER.A	-1
LRRC56	0.0151856	5	5	98	98	QA	-1
DLX3	0.0152423	1	1	2	2	ER	0.0152423
PKMYT1	0.0153903	3	3	33	33	ER.A	-1
ATP13A3	0.0155303	8	8	67	67	QA	-1
C17orf75	0.015577	2	2	35	35	ER.A	-1
FMO4	0.0157102	6	6	71	64	QA	-1
SUGP2	0.0157552	6	6	26	26	ER.A	-1
SLCO1B7	0.015848	2	2	13	13	ER	8.79e-08
TBC1D19	0.0158575	2	2	33	33	ER.A	-1
TTYH2	0.0159054	7	7	38	38	ER.A	-1
TBCD	0.0160858	7	7	27	27	ER.A	-1
DENND2D	0.0163255	4	4	88	88	QA	-1
UBXN1	0.0164153	3	3	7	7	ER	2.63e-05
SLC35F1	0.0166538	3	3	20	20	ER	3.79e-13
RRNAD1	0.0166719	4	4	7	7	ER	2.56e-05
SLC36A4	0.0171028	3	3	3	3	ER	0.0171028
HEXIM1	0.0171106	4	4	7	7	ER	7.83e-05
FSCN1	0.0171494	4	4	20	20	ER	1.14e-11
POLR2D	0.0172771	3	3	18	18	ER	1.22e-11
ZNF695	0.0173151	6	6	49	49	QA	-1
NUCB1	0.0174376	6	6	32	31	ER.A	-1
SCAMP4	0.0174743	2	2	2	2	ER	0.0174743
KCNK1	0.0174936	7	7	54	54	QA	-1
VWA3A	0.0177389	12	12	88	87	QA	-1
ZNF785	0.0178157	5	5	36	36	ER.A	-1
MACC1	0.0178611	6	6	118	117	QA	-1
SLC39A14	0.0179113	4	4	29	28	ER.A	-1
ALS2	0.0179606	11	11	99	98	QA	-1
CRX	0.0183753	1	1	7	7	ER	0.000110113
FBXO30	0.0184267	5	5	21	21	ER.A	-1
CTRL	0.0185272	3	3	6	6	ER	0.000261321
GJA5	0.0185567	2	2	5	5	ER	0.00102939
PODXL2	0.0186067	6	6	20	20	ER	6.21e-12
FAP	0.018688	3	3	60	60	QA	-1
SIGLEC11	0.0187116	2	2	30	30	ER.A	-1
WBSCR17	0.0187476	3	3	28	28	ER.A	-1
DPP10	0.0187805	1	1	23	22	ER.A	-1
GALNT8	0.0189055	10	10	53	52	QA	-1
KIF14	0.0189419	2	2	14	14	ER	1.02e-08
ADAP1	0.0190025	1	1	5	5	ER	0.00142219
DDTL	0.0190231	1	1	13	13	ER	3.37e-08
OLFM2	0.0191815	2	2	7	7	ER	1.75e-05
LYPD4	0.019212	2	2	4	4	ER	0.019212
PSKH1	0.0192315	2	2	69	69	QA	-1
LAP3	0.019273	7	7	83	82	QA	-1
C2orf80	0.0193855	1	1	8	8	ER	8.98e-06
ZMIZ1	0.0195028	6	6	38	38	ER.A	-1
ARID4B	0.0198217	11	11	74	74	QA	-1
ELMO3	0.0198337	12	12	119	102	QA	-1
CHD1	0.0198368	7	7	33	33	ER.A	-1
MMP1	0.0198836	10	10	123	121	QA	-1
USP37	0.0198845	4	4	122	121	QA	-1
FAM160B2	0.0198866	5	5	117	116	QA	-1
TMEM130	0.0199152	3	3	40	40	ER.A	-1
OGFOD1	0.0199389	3	3	10	10	ER	4.54e-07
MTHFSD	0.0200138	2	2	13	13	ER	5.19e-08
PROKR1	0.0200583	4	4	6	6	ER	0.000751253
OR10A5	0.0200897	2	2	14	14	ER	2.61e-09
TXNRD2	0.0201273	1	1	6	6	ER	0.000105418
LAD1	0.0203773	7	7	50	50	QA	-1
LRRC42	0.0203891	7	6	22	22	ER.A	-1
KRTAP10-11	0.0204201	1	1	4	4	ER	0.00121833
TNFRSF21	0.0204571	3	3	26	26	ER.A	-1
GREM1	0.0204726	3	3	8	8	ER	5.98e-06
FOS	0.0205947	2	2	3	3	ER	0.0205947
PNMT	0.020623	5	5	8	8	ER	4.58e-05
RFX7	0.0206679	8	8	29	29	ER.A	-1
C8orf86	0.0206882	2	2	20	20	ER	1.5e-11
NTSR1	0.0207117	10	10	146	127	QA	-1
ANO7	0.0208075	12	12	196	195	QA	-1
TMX2	0.0208219	3	3	27	27	ER.A	-1
TBC1D9	0.020882	7	7	34	33	ER.A	-1
TFF3	0.0209105	1	1	23	23	ER.A	-1
RAPGEFL1	0.0209621	4	4	11	11	ER	2.32e-06
ACOT8	0.021002	5	5	48	47	QA	-1
TMEM143	0.0210851	6	6	65	65	QA	-1
NMS	0.0211326	2	2	69	69	QA	-1
CIDEB	0.0211817	4	4	46	45	QA	-1
ABRA	0.0212189	3	3	44	44	QA	-1
HYAL2	0.0213471	4	4	13	12	ER	7.63e-08
NEURL4	0.021407	10	10	55	54	QA	-1
EVI5L	0.0215247	2	2	5	5	ER	0.000146874
MTOR	0.0215647	6	6	6	6	ER	0.000284299
SRRM4	0.0215674	2	2	22	22	ER.A	-1
TCEB3	0.0216759	5	5	81	80	QA	-1
MYB	0.0217635	6	6	60	59	QA	-1
NEK5	0.0217881	1	1	9	9	ER	1.62e-05
EIF4B	0.0218766	3	2	28	27	ER.A	-1
DAK	0.0220373	9	9	29	29	ER.A	-1
CCIN	0.0222254	2	2	17	17	ER	4.46e-11
CDC14B	0.0222821	4	4	8	7	ER	0.000111669
PHLPP2	0.0223291	13	13	136	135	QA	-1
LYRM1	0.022354	2	2	2	2	ER	0.022354
TMEM105	0.022443	3	3	8	8	ER	4.63e-05
EHD4	0.0227255	5	5	30	30	ER.A	-1
ADPRM	0.0228451	4	4	4	4	ER	0.00679372
HIRA	0.0228723	6	6	63	63	QA	-1
WSCD1	0.0229261	9	9	19	19	ER	2.32e-12
SPRYD3	0.023042	2	2	2	2	ER	0.023042
PGAM5	0.0231006	2	2	14	14	ER	2.4e-08
SPHKAP	0.0232643	7	7	49	49	QA	-1
C12orf65	0.0232705	1	1	2	2	ER	0.0232705
SPTLC1	0.0233126	1	1	2	2	ER	0.0233126
SARM1	0.0233758	1	1	34	34	ER.A	-1
RPS26	0.0233935	2	2	3	3	ER	0.0233935
SSTR1	0.0234285	2	2	2	2	ER	0.0234285
TMEM126A	0.023469	5	5	14	14	ER	1.25e-08
ECHDC3	0.023567	3	3	75	75	QA	-1
CARD11	0.0235952	6	6	9	9	ER	3.77e-06
ALDH4A1	0.0236291	5	5	24	24	ER.A	-1
CAST	0.0237372	9	9	25	25	ER.A	-1
ZNF385D	0.0237657	3	3	6	6	ER	6.88e-05
ALOXE3	0.0238445	11	11	129	128	QA	-1
SLC38A1	0.0239481	1	1	13	13	ER	1.69e-07
SPG7	0.0239549	3	3	32	32	ER.A	-1
HDAC7	0.0240195	5	5	92	91	QA	-1
DUOX2	0.0240924	18	18	120	119	QA	-1
CHD9	0.0241967	8	8	40	40	ER.A	-1
MICALL1	0.024216	3	3	10	10	ER	1.01e-05
CHRNA4	0.0242609	2	2	53	51	QA	-1
FICD	0.0242963	3	3	3	3	ER	0.0242963
FHIT	0.0243193	3	3	3	3	ER	0.00624824
LRRC17	0.0243602	9	9	38	38	ER.A	-1
SAMD3	0.0243992	7	7	82	81	QA	-1
CCNJ	0.0244123	3	3	3	3	ER	0.00506875
UGT1A9	0.0244935	2	2	5	5	ER	0.0017986
NDUFAF3	0.0245615	3	3	64	63	QA	-1
OR9Q2	0.0246893	5	5	49	49	QA	-1
TTC4	0.0248679	4	4	27	27	ER.A	-1
KLK15	0.0248822	2	2	17	17	ER	2.34e-10
B3GALT4	0.0248881	3	3	3	3	ER	0.00756772
LGALS2	0.0249928	4	4	11	11	ER	7.06e-08
ANP32B	0.0249955	2	2	4	4	ER	0.00373499
RIPK4	0.0251415	1	1	10	10	ER	4.99e-06
APBB1	0.0252002	4	4	37	37	ER.A	-1
SBNO2	0.0252142	4	4	5	5	ER	0.000982345
HPSE	0.0253778	4	4	24	24	ER.A	-1
FASTKD5	0.0254383	5	5	7	7	ER	0.000294246
PCBD2	0.0255277	1	1	6	6	ER	0.000143662
TFF2	0.0255529	2	2	24	24	ER.A	-1
MLH1	0.0256087	10	10	74	72	QA	-1
PCDHB14	0.0256355	2	2	74	74	QA	-1
DLL1	0.0257313	4	4	32	32	ER.A	-1
TCTEX1D2	0.0258765	1	1	4	4	ER	0.00171063
CAMK2B	0.0259428	1	1	4	4	ER	0.00136979
RFWD3	0.0259699	4	4	98	97	QA	-1
IKZF3	0.0260461	3	3	15	15	ER	1.32e-10
TMEM154	0.0260629	2	2	50	50	QA	-1
ANKRD34B	0.0260901	4	3	81	81	QA	-1
TSPYL1	0.0262049	2	2	10	10	ER	1.34e-07
APOL2	0.0262124	2	2	3	3	ER	0.00672879
LMAN1L	0.0262704	2	2	4	4	ER	0.00378462
HOXB1	0.0262911	2	2	2	2	ER	0.0262911
OLFML1	0.0263444	4	4	53	53	QA	-1
DPH2	0.0263446	4	4	31	31	ER.A	-1
EML3	0.0263681	5	5	106	104	QA	-1
JAK2	0.0263815	5	5	30	30	ER.A	-1
CASZ1	0.0264138	11	11	39	39	ER.A	-1
BAG2	0.0264341	1	1	48	48	QA	-1
ECEL1	0.0264869	8	8	58	57	QA	-1
C21orf91	0.0265437	2	2	2	2	ER	0.0265437
TOR3A	0.0266265	3	3	10	10	ER	1.16e-06
RGS1	0.0266658	2	2	13	13	ER	1.47e-08
ZNF675	0.0267382	1	1	6	6	ER	0.000135261
LURAP1L	0.0267413	2	2	23	23	ER.A	-1
SLC6A20	0.0269641	5	5	12	12	ER	1.41e-08
PON1	0.0270929	1	1	11	11	ER	4.18e-07
CPSF6	0.027385	5	5	7	7	ER	1.29e-05
GALNT2	0.0274177	5	5	66	66	QA	-1
AP2B1	0.0275645	2	2	2	2	ER	0.0275645
PARP6	0.0277885	3	3	10	10	ER	3.56e-06
SAAL1	0.0278289	4	4	16	16	ER	1.82e-09
PRKAR2A	0.0279738	1	1	6	6	ER	0.000181686
ERCC3	0.0280072	10	10	135	135	QA	-1
PLSCR2	0.0283106	4	4	44	44	QA	-1
OLFM4	0.0283737	2	2	3	3	ER	0.00803062
HNF1B	0.0284872	3	3	51	50	QA	-1
MYO1E	0.028618	2	2	2	2	ER	0.028618
UBE2O	0.0286713	7	7	21	21	ER.A	-1
GALNT13	0.0289313	3	3	44	43	QA	-1
DSCR3	0.0289532	2	2	20	20	ER	2.64e-12
RPP40	0.0291691	1	1	13	13	ER	6.15e-09
PROP1	0.0293381	2	2	2	2	ER	0.0293381
FETUB	0.0293536	3	3	3	3	ER	0.0293536
TOP2A	0.0294662	5	5	61	61	QA	-1
EPB41L4B	0.0294925	8	8	15	15	ER	1.08e-09
NCOA7	0.0295002	6	6	37	36	ER.A	-1
OPRL1	0.0297442	9	8	15	15	ER	1.22e-09
SIGLEC8	0.0297556	2	2	57	57	QA	-1
AFG3L2	0.0298388	2	2	2	2	ER	0.0298388
LRP6	0.0298695	8	8	40	40	ER.A	-1
KCNH7	0.0298881	7	7	77	76	QA	-1
TMC2	0.0299824	12	12	125	125	QA	-1
SUSD1	0.0301387	12	10	48	48	QA	-1
NMRK1	0.0301935	1	1	15	15	ER	2.1e-09
IER5	0.0301993	1	1	8	8	ER	2.03e-05
SRRD	0.0302254	2	1	19	19	ER	3.39e-11
ENTHD1	0.0305212	4	4	25	25	ER.A	-1
PANK2	0.0307031	7	7	31	31	ER.A	-1
TLE6	0.0308425	4	4	32	32	ER.A	-1
ZNF783	0.0308881	2	2	25	25	ER.A	-1
MAPKAP1	0.0309145	3	3	29	29	ER.A	-1
NTF3	0.030979	3	3	44	44	QA	-1
GATAD2B	0.0310191	1	1	12	12	ER	4.77e-08
C1orf168	0.0311263	6	6	38	38	ER.A	-1
UNG	0.0312252	1	1	3	3	ER	0.0312252
TCIRG1	0.0313666	6	6	73	73	QA	-1
BEND7	0.0314567	2	2	5	5	ER	0.00206529
IRF2BPL	0.0315481	2	2	4	4	ER	0.0017425
DBF4B	0.0315772	5	5	71	70	QA	-1
NEDD4L	0.0315908	3	3	33	33	ER.A	-1
BDNF	0.0315949	3	3	4	4	ER	0.00330534
CD101	0.0315989	8	8	45	45	QA	-1
WNK2	0.0317618	5	5	10	10	ER	1.65e-06
GPD2	0.0318104	5	5	8	8	ER	5.12e-06
IGSF3	0.0318833	8	8	78	78	QA	-1
FAM71E1	0.031917	2	2	18	17	ER	2.2e-11
SLC9A2	0.0319506	7	7	73	73	QA	-1
ATXN7	0.0319887	6	6	48	48	QA	-1
POT1	0.0319924	3	3	3	3	ER	0.00884606
TDP1	0.03206	2	2	4	4	ER	0.00500665
INO80	0.0320655	3	3	23	23	ER.A	-1
ATAD3C	0.0320906	8	8	63	63	QA	-1
R3HDM2	0.0320921	1	1	26	26	ER.A	-1
CEACAM7	0.0321493	2	2	49	49	QA	-1
ATP11A	0.0321689	12	12	111	111	QA	-1
HAUS4	0.0322024	3	3	8	8	ER	7.28e-06
VDR	0.0322511	3	3	42	42	QA	-1
IFNW1	0.0324465	3	3	37	37	ER.A	-1
GK2	0.0325911	9	9	42	42	QA	-1
SLC22A8	0.0327253	5	5	98	98	QA	-1
TMC7	0.0327778	8	8	71	71	QA	-1
HOXA3	0.0328135	1	1	16	16	ER	1.97e-10
FBXW9	0.0328973	5	5	92	91	QA	-1
VENTX	0.0329434	2	2	8	8	ER	5.77e-05
AGMAT	0.0330542	5	5	51	51	QA	-1
KCNIP3	0.033068	1	1	2	2	ER	0.033068
ELANE	0.0330729	3	3	6	6	ER	4.14e-05
LPCAT3	0.0330964	2	2	2	2	ER	0.0330964
TMEM184A	0.0331793	7	7	20	20	ER	7.61e-12
ZIK1	0.0332276	4	4	48	48	QA	-1
AP1B1	0.0335624	9	9	56	56	QA	-1
RNF6	0.0335944	3	3	7	7	ER	0.000115599
MMACHC	0.0336091	3	3	25	25	ER.A	-1
NCKAP5L	0.0336179	7	7	77	77	QA	-1
C2orf44	0.0336982	5	5	55	55	QA	-1
STRIP2	0.0337575	4	4	12	12	ER	5.32e-09
NEDD4	0.0338528	13	13	157	155	QA	-1
ADORA1	0.0340307	1	1	16	16	ER	5.72e-10
ARHGEF11	0.0341885	15	15	241	236	QA	-1
PAFAH2	0.0341886	9	9	124	122	QA	-1
EPC1	0.0341946	9	9	28	27	ER.A	-1
NMBR	0.0342059	6	6	65	65	QA	-1
NIPBL	0.0343203	8	8	70	69	QA	-1
OR2AT4	0.0343451	2	2	9	9	ER	1.8e-05
SMEK2	0.0343699	4	4	85	85	QA	-1
FARP2	0.0343848	13	13	113	113	QA	-1
IRF9	0.0346304	2	2	6	6	ER	0.000195288
HOXB6	0.0348079	2	2	16	16	ER	5.93e-10
PSMD3	0.0348395	6	6	44	44	QA	-1
RAB32	0.0350808	2	2	26	26	ER.A	-1
RNF130	0.0351424	3	3	4	4	ER	0.00151596
TEKT1	0.0351774	5	5	8	8	ER	2.13e-05
HAUS6	0.0352879	3	3	3	3	ER	0.00719119
KRTAP26-1	0.0352965	2	2	12	12	ER	9.66e-08
AMER2	0.0354325	4	4	25	25	ER.A	-1
SYNGR4	0.03552	3	3	27	27	ER.A	-1
IFNE	0.035649	2	2	5	5	ER	0.00289748
SGPL1	0.0358418	8	8	69	67	QA	-1
KCNAB2	0.0358795	4	4	6	6	ER	8.32e-05
TREH	0.0359218	3	3	74	74	QA	-1
LTB4R	0.0359822	3	3	14	14	ER	2.08e-08
CABLES2	0.0362784	3	3	31	31	ER.A	-1
TBC1D13	0.0364901	3	3	4	4	ER	0.00158029
PRUNE	0.0365641	5	5	44	43	QA	-1
ADSSL1	0.0366427	9	9	29	29	ER.A	-1
GALE	0.0366862	5	5	6	6	ER	0.000143414
ITIH2	0.0366949	12	12	136	135	QA	-1
NME9	0.0371692	1	1	46	45	QA	-1
EPHA5	0.0372863	4	4	4	4	ER	0.0026852
SV2B	0.0372944	10	10	154	153	QA	-1
MGAT4A	0.0374202	5	5	11	11	ER	7.64e-08
SLC3A2	0.0375643	3	3	16	16	ER	4.66e-09
ZNF394	0.0375896	4	4	5	5	ER	0.00314671
ASAP3	0.0376064	7	7	25	25	ER.A	-1
TMEM190	0.037618	2	2	6	6	ER	4.25e-05
DMXL2	0.0376779	21	21	103	102	QA	-1
PTRH1	0.0376791	2	2	5	5	ER	0.00299828
DDX19A	0.0377826	1	1	7	7	ER	2.3e-05
AGO2	0.0380158	2	2	2	2	ER	0.0380158
MACROD2	0.0380884	4	3	31	31	ER.A	-1
ANKRD40	0.0381726	1	1	5	5	ER	0.000205204
TMEM132E	0.0383121	3	3	12	12	ER	2.7e-08
ZNF423	0.0384497	5	5	15	15	ER	2.21e-09
HBP1	0.038513	3	3	21	21	ER.A	-1
SNAPC3	0.0385491	1	1	9	9	ER	3.55e-06
RSAD1	0.0385906	4	4	7	7	ER	0.000202926
BRD9	0.0386931	4	4	14	14	ER	6.94e-09
ARL14	0.0388205	1	1	12	12	ER	2.99e-07
PMS1	0.0388209	3	3	70	70	QA	-1
AKR1C2	0.03883	2	2	43	43	QA	-1
OR10P1	0.0391545	3	3	6	6	ER	0.000268375
PRADC1	0.0392056	2	2	4	4	ER	0.00912049
DBNDD2	0.0393986	1	1	7	7	ER	2.28e-05
INSL6	0.0394412	1	1	2	2	ER	0.0394412
MAPK7	0.0394809	4	4	15	15	ER	3.22e-09
NUP210L	0.0395122	8	8	72	71	QA	-1
MXI1	0.0395167	1	1	2	2	ER	0.0395167
CCNT2	0.0395207	1	1	5	5	ER	0.000229224
FAM19A4	0.0395211	2	2	15	15	ER	6.73e-09
OR10K2	0.0396803	4	4	15	15	ER	5.01e-08
FUBP3	0.039783	3	3	25	25	ER.A	-1
PARP2	0.0398284	3	3	56	56	QA	-1
MECR	0.0398984	5	5	93	92	QA	-1
EVC2	0.0402119	18	17	133	118	QA	-1
SH3PXD2B	0.0403439	8	8	46	46	QA	-1
NAT1	0.040359	1	1	6	6	ER	0.000260376
KIAA0947	0.0404556	12	12	103	102	QA	-1
MEOX2	0.0404609	1	1	2	2	ER	0.0404609
KRTAP6-1	0.0405074	3	3	18	18	ER	3.51e-11
XPA	0.0408941	1	1	2	2	ER	0.0408941
SCFD2	0.041101	8	8	39	39	ER.A	-1
CPSF4	0.0411054	1	1	4	4	ER	0.0034043
RASIP1	0.0411265	1	1	6	6	ER	0.000278565
SLC6A17	0.0411531	5	5	81	80	QA	-1
PPOX	0.0411684	1	1	9	9	ER	5.4e-06
FBXO4	0.0412175	1	1	33	33	ER.A	-1
FAM208A	0.0412367	7	6	14	14	ER	3.04e-07
AMN	0.0413332	2	2	2	2	ER	0.0413332
MAPK4	0.0414108	7	7	77	76	QA	-1
HLA-DMA	0.0414438	2	2	2	2	ER	0.0414438
RNF219	0.0414942	2	2	2	2	ER	0.0414942
ZPBP	0.0415306	1	1	18	18	ER	9.14e-12
RGS9	0.0415497	3	3	18	18	ER	1.25e-10
ACSBG2	0.0415666	3	3	49	48	QA	-1
GAS2L3	0.0417804	7	7	35	21	ER.A	-1
FAM151A	0.0419901	10	10	144	144	QA	-1
TAF1C	0.042285	11	10	110	110	QA	-1
LRRN3	0.0423224	5	5	41	41	QA	-1
UNC45B	0.042509	14	14	111	101	QA	-1
S1PR4	0.0425606	6	6	31	30	ER.A	-1
CHD7	0.0427604	19	19	109	109	QA	-1
TRMT5	0.0427886	3	3	37	36	ER.A	-1
AGFG2	0.0430325	7	6	9	8	ER	1.17e-05
PXN	0.0430601	4	4	4	4	ER	0.00103394
RAB3GAP1	0.0430917	7	7	65	65	QA	-1
2022-09-08	0.0431328	5	5	25	25	ER.A	-1
NTM	0.0431538	3	3	15	15	ER	6.31e-09
PPP2R3A	0.0431628	12	12	85	85	QA	-1
FAM134C	0.043176	2	2	12	12	ER	9.48e-07
SLC26A9	0.0432681	6	5	60	60	QA	-1
SCRIB	0.0434428	10	10	17	17	ER	2.16e-11
ZFAND4	0.0435169	8	8	49	49	QA	-1
SLC38A6	0.0435241	2	2	4	4	ER	0.00288173
IGSF10	0.0435464	24	24	343	335	QA	-1
CBS	0.0436756	4	4	59	58	QA	-1
SCGB1D4	0.04368	1	1	17	17	ER	2.44e-10
CELA2A	0.0436968	3	3	27	27	ER.A	-1
CDK5RAP3	0.0437348	5	4	48	48	QA	-1
PIK3R6	0.0439146	2	2	10	10	ER	4.07e-06
CCBE1	0.0439312	3	3	3	3	ER	0.0144137
SEC31A	0.0439536	4	4	19	19	ER	2.67e-11
CLPB	0.0439552	8	8	19	19	ER	1.93e-11
DHX8	0.0439797	7	7	56	56	QA	-1
PITPNC1	0.0440807	2	2	2	2	ER	0.0440807
FAM111B	0.0440837	2	2	2	2	ER	0.0440837
SNX13	0.0440951	1	1	18	18	ER	3.97e-11
NR1D2	0.0442615	3	3	6	6	ER	0.000125747
MRPS18A	0.0442644	2	2	5	5	ER	0.000799227
TBC1D14	0.0444965	5	5	31	31	ER.A	-1
SYNGR2	0.0446963	1	1	4	4	ER	0.00370889
CXCR2	0.0447524	4	4	11	11	ER	3.59e-07
SLC9A4	0.0448899	5	5	45	45	QA	-1
NCSTN	0.0450017	5	5	118	117	QA	-1
CD82	0.045259	3	3	3	3	ER	0.0126487
CUEDC2	0.0452942	6	6	61	61	QA	-1
PTCHD4	0.0453125	2	2	2	2	ER	0.0453125
RAG2	0.0453562	5	5	15	15	ER	1.67e-10
NTN3	0.0454383	4	4	32	32	ER.A	-1
ZNF516	0.0454403	6	6	48	47	QA	-1
SLC18A1	0.0454709	9	8	9	9	ER	6.51e-06
FNBP1	0.0455205	2	2	6	6	ER	0.000260441
BBOX1	0.0455304	2	2	17	17	ER	2.32e-10
PGS1	0.0456113	5	5	124	124	QA	-1
RALBP1	0.0457046	2	2	2	2	ER	0.0457046
LRSAM1	0.0457215	4	4	24	24	ER.A	-1
STK32B	0.0458718	2	2	11	11	ER	3.9e-07
SMARCB1	0.0459719	1	1	10	10	ER	4.54e-07
STXBP5L	0.0459865	8	8	29	29	ER.A	-1
GLIS3	0.0460171	2	2	2	2	ER	0.0460171
HFE	0.046066	2	2	6	6	ER	0.000336847
AGPAT3	0.0462118	5	5	7	7	ER	0.000134486
DHX30	0.0464169	5	5	12	12	ER	6.55e-08
RNASEL	0.0464791	5	5	81	48	QA	-1
TCERG1	0.0466092	5	5	12	12	ER	1.1e-07
RNF212	0.0466455	2	2	2	2	ER	0.0466455
ADRA1A	0.0467718	4	4	53	53	QA	-1
SIGLEC7	0.0468711	5	5	24	24	ER.A	-1
OR5J2	0.046942	2	2	2	2	ER	0.046942
TACC1	0.0469606	5	5	58	58	QA	-1
ZNF501	0.0473081	2	2	2	2	ER	0.0473081
C2orf70	0.0473402	2	2	2	2	ER	0.0473402
LAMB4	0.0474437	16	16	99	96	QA	-1
ZNF804B	0.0475806	7	7	65	64	QA	-1
AKAP1	0.0476368	6	6	108	107	QA	-1
HAS1	0.0476372	3	2	32	32	ER.A	-1
GNE	0.04774	4	4	8	8	ER	3.98e-05
EMB	0.0478841	6	6	10	10	ER	6.99e-07
CREB3L4	0.0480989	4	4	11	10	ER	1.67e-06
TAF5L	0.048183	3	3	38	38	ER.A	-1
NR2E1	0.0482204	2	2	2	2	ER	0.0482204
LY6K	0.0482355	2	2	4	4	ER	0.00294687
MTMR14	0.048263	7	7	54	54	QA	-1
OR5B17	0.0483039	4	4	10	10	ER	3.06e-06
METTL2B	0.0483472	2	2	12	12	ER	7.23e-07
PRKCE	0.0483969	5	5	42	42	QA	-1
ACER1	0.0484374	3	3	4	4	ER	0.00354662
MYEOV2	0.0484413	1	1	2	2	ER	0.0484413
TREML1	0.0484553	4	4	49	49	QA	-1
DAO	0.0484573	4	4	30	30	ER.A	-1
PSMF1	0.0484646	2	2	10	10	ER	1.2e-06
RMI1	0.0485367	5	5	20	18	ER	1.76e-11
LRRC55	0.0485443	2	2	2	2	ER	0.0485443
RRS1	0.0485767	3	3	19	19	ER	3.39e-10
FGFR3	0.0486969	4	4	32	32	ER.A	-1
ACBD4	0.048889	2	2	2	2	ER	0.048889
HNRNPUL1	0.0489392	8	8	48	48	QA	-1
PTH2R	0.0489773	6	6	79	79	QA	-1
STAM	0.0490725	3	3	83	83	QA	-1
SULT1C4	0.0490829	1	1	2	2	ER	0.0490829
FBXO10	0.049102	9	9	51	51	QA	-1
CST1	0.0491359	3	3	12	12	ER	8.69e-08
MLK4	0.0492277	8	8	90	89	QA	-1
SMG8	0.0492769	4	4	15	15	ER	1.07e-09
DNAJC16	0.0494162	4	4	29	29	ER.A	-1
GRM6	0.0494438	16	16	80	77	QA	-1
GAK	0.0494675	17	17	115	114	QA	-1
AKAP11	0.0494678	11	11	77	75	QA	-1
SYNGR1	0.0495388	2	2	2	2	ER	0.0495388
APOA1	0.0496587	3	3	8	8	ER	2.7e-05
CYP3A5	0.0496626	4	4	35	35	ER.A	-1
PTGR1	0.0497043	6	6	29	29	ER.A	-1
CAD	0.0497073	14	14	98	97	QA	-1
STX7	0.0500309	1	1	2	2	ER	0.0500309
SLC38A4	0.0500381	5	5	60	60	QA	-1
PRR25	0.0502584	1	1	2	2	ER	0.0502584
ATG12	0.050279	1	1	7	7	ER	3.38e-05
RAB3IL1	0.0505187	5	5	24	24	ER.A	-1
SLC11A2	0.0505315	1	1	6	6	ER	0.000516479
SEPW1	0.0507082	1	1	44	44	QA	-1
SLC19A2	0.0508663	3	3	10	10	ER	2.51e-06
TNS3	0.0509183	13	11	188	187	QA	-1
TJP2	0.0509968	6	6	11	11	ER	3.83e-07
GALNT10	0.0510923	5	5	15	15	ER	3.18e-09
KLHL30	0.0511218	2	2	46	46	QA	-1
MYO1G	0.0512076	15	15	84	82	QA	-1
BSCL2	0.051301	4	4	60	60	QA	-1
PARD6B	0.0513303	2	2	50	50	QA	-1
CFH	0.0513462	5	5	6	5	ER	0.000314805
BICD1	0.0513792	4	4	8	8	ER	3.66e-05
SLC39A3	0.051584	2	2	10	10	ER	1.25e-06
LGALS13	0.0515898	3	3	9	9	ER	2.9e-05
ENKUR	0.0517534	4	4	68	68	QA	-1
ACADVL	0.0517634	6	6	42	42	QA	-1
CHRNA2	0.0519495	7	7	17	17	ER	6.04e-10
PLA2G2D	0.0521433	3	3	10	10	ER	2.82e-06
IL23R	0.0521879	4	4	7	7	ER	3.09e-05
LDHB	0.0522666	2	2	4	4	ER	0.00383805
SAV1	0.0523629	3	3	32	32	ER.A	-1
ANKRD55	0.0524295	8	8	70	70	QA	-1
CSNK2A1	0.0524576	1	1	14	14	ER	6.26e-09
TRAPPC10	0.0525086	3	3	11	11	ER	2.8e-08
CCDC105	0.0527382	6	6	47	47	QA	-1
TIAF1	0.0528929	1	1	19	19	ER	1.53e-11
LIF	0.0529595	3	3	3	3	ER	0.0151564
SELO	0.0531787	7	7	124	122	QA	-1
SLC35E1	0.0532233	3	3	6	6	ER	0.000135519
FAF1	0.0534307	6	6	35	35	ER.A	-1
MSLN	0.0534729	9	9	45	45	QA	-1
AEN	0.0537603	4	4	68	68	QA	-1
OR6C70	0.0538816	2	2	40	40	ER.A	-1
C1orf109	0.0539223	2	2	10	10	ER	1.6e-06
ARHGAP22	0.0540723	5	5	5	5	ER	0.00150651
CLCNKB	0.0540743	6	6	130	130	QA	-1
SCPEP1	0.0540798	5	5	21	21	ER.A	-1
ZBTB49	0.0542826	8	8	31	31	ER.A	-1
MRPS5	0.0544062	4	4	39	39	ER.A	-1
ALKBH6	0.0544558	1	1	3	3	ER	0.0544558
CLU	0.0545504	2	2	2	2	ER	0.0545504
METTL9	0.0546346	2	2	2	2	ER	0.0546346
MIOX	0.0546734	3	3	14	14	ER	7.68e-08
ZMYND15	0.0546805	4	4	6	6	ER	0.000453052
ATP8B3	0.0547348	15	13	158	155	QA	-1
SH2D7	0.0547564	3	3	95	95	QA	-1
TRAF3IP3	0.0548601	2	2	6	6	ER	8.47e-05
ERGIC1	0.0549078	3	3	52	52	QA	-1
GCDH	0.0549753	3	3	8	8	ER	3.31e-05
SPINK13	0.0549822	2	2	9	9	ER	1.91e-05
ERMAP	0.0550066	5	5	54	54	QA	-1
ZFYVE1	0.0550468	3	3	25	25	ER.A	-1
TCAIM	0.0550716	2	2	2	2	ER	0.0550716
PTK7	0.055112	8	8	31	31	ER.A	-1
SESN1	0.0553046	5	5	7	7	ER	0.000146262
ATP6V1B1	0.0553773	4	4	11	11	ER	8.94e-08
FBXW8	0.0555475	10	10	162	162	QA	-1
PIAS2	0.0555544	5	4	11	11	ER	1.13e-06
ATP6V1G3	0.0556602	1	1	4	4	ER	0.00509665
DHX34	0.0556749	6	6	44	44	QA	-1
HIP1R	0.055735	10	10	31	31	ER.A	-1
GABRD	0.0557363	2	2	2	2	ER	0.0557363
KIF1C	0.0557489	6	6	93	93	QA	-1
CEBPD	0.0557621	3	3	4	4	ER	0.00302481
TSPAN5	0.0557702	1	1	5	5	ER	0.000371376
FKBP15	0.05586	6	6	25	25	ER.A	-1
PABPN1	0.0559394	2	2	2	2	ER	0.0559394
SP3	0.0559414	5	5	29	29	ER.A	-1
RAPGEF2	0.0559817	9	9	81	80	QA	-1
PHF14	0.0560058	2	2	2	2	ER	0.0560058
CKAP4	0.0560547	5	5	46	46	QA	-1
HIVEP2	0.056086	12	12	46	46	QA	-1
FAM173B	0.0561653	5	5	43	43	QA	-1
TRIM72	0.0563011	2	2	2	2	ER	0.0563011
LGR6	0.056314	6	6	17	17	ER	1.18e-10
TRPV4	0.0563281	7	7	27	27	ER.A	-1
FJX1	0.0564776	1	1	3	3	ER	0.00398166
UEVLD	0.0564991	5	5	62	57	QA	-1
IGFALS	0.0565456	6	6	12	12	ER	9.83e-08
LYPD6	0.0566685	2	2	15	15	ER	1.06e-09
IYD	0.0567225	2	2	2	2	ER	0.0567225
ELOVL3	0.0567836	2	2	20	20	ER	6.87e-13
SGSM3	0.0568152	6	6	11	11	ER	7.47e-07
ARRDC5	0.0568447	6	6	81	81	QA	-1
CCDC30	0.056953	4	4	89	89	QA	-1
FGG	0.0569595	4	4	46	45	QA	-1
CAPN5	0.0571126	6	6	58	58	QA	-1
SOX9	0.0572336	2	2	2	2	ER	0.013042
GPR132	0.0572825	3	3	3	3	ER	0.0140122
ANKRD6	0.0573723	2	2	18	18	ER	2.77e-11
RHOBTB3	0.0574303	3	3	28	28	ER.A	-1
GAS2L2	0.0574733	3	3	6	6	ER	0.000193732
C16orf71	0.057764	3	3	8	8	ER	8.6e-06
INTS4	0.0577803	1	1	3	3	ER	0.00389221
FSHB	0.0577855	1	1	19	19	ER	8e-11
TRIM63	0.0577931	2	2	60	60	QA	-1
DACT1	0.0579545	4	4	65	65	QA	-1
PPP1R13L	0.0585463	2	2	11	11	ER	4.62e-06
IWS1	0.0585583	5	5	48	48	QA	-1
BARHL2	0.0586221	2	2	7	7	ER	3.47e-05
GPR155	0.0586245	4	4	12	12	ER	3.44e-07
TAF1A	0.0586826	2	2	4	4	ER	0.00419759
OGFOD3	0.0587372	4	3	35	35	ER.A	-1
URGCP	0.0590969	6	6	7	7	ER	4.48e-05
CEND1	0.0591599	2	2	54	54	QA	-1
IQSEC3	0.0591668	4	4	10	10	ER	2.89e-06
SCNN1A	0.0592824	10	10	114	112	QA	-1
TBC1D5	0.0593236	3	3	7	7	ER	0.000224211
SYBU	0.0596012	3	3	54	54	QA	-1
C21orf62	0.0597219	2	2	70	70	QA	-1
SEZ6L2	0.0598532	3	3	77	77	QA	-1
CHST6	0.0599628	2	2	44	43	QA	-1
ASH2L	0.0600484	3	3	17	17	ER	5.41e-10
KRTAP4-12	0.0601613	1	1	13	13	ER	4.56e-06
KITLG	0.0602075	2	2	2	2	ER	0.0602075
ADAMTSL5	0.06026	1	1	2	2	ER	0.06026
CA13	0.0605078	3	3	9	9	ER	5.14e-06
HERC1	0.0605462	18	18	133	132	QA	-1
SLC26A11	0.0607281	10	10	101	101	QA	-1
CLDN5	0.0607562	1	1	1	1	ER	0.0607562
SSR1	0.0607562	1	1	1	1	ER	0.0607562
ADH4	0.0607968	1	1	15	15	ER	2.26e-09
MED29	0.0608113	1	1	25	25	ER.A	-1
ETS1	0.0608547	6	6	42	42	QA	-1
DDX41	0.0608911	5	5	71	71	QA	-1
CRYBA2	0.0608971	2	2	18	18	ER	1.25e-10
ZNF362	0.0609072	4	4	8	8	ER	3.32e-06
DOCK9	0.0610126	11	11	57	56	QA	-1
SOX17	0.0611296	2	2	3	3	ER	0.0161492
CHD8	0.0611727	3	3	5	5	ER	0.00115574
NNMT	0.0613845	6	6	42	42	QA	-1
FOXO1	0.0614142	3	3	12	12	ER	1.15e-07
GPR126	0.0614159	6	6	25	25	ER.A	-1
IGFL3	0.0614565	2	2	15	15	ER	2.12e-09
P2RY14	0.0615631	2	2	11	11	ER	1.14e-06
LRCH1	0.0619016	7	7	86	85	QA	-1
ACCS	0.0619021	3	3	11	11	ER	1.38e-06
ABCB1	0.0619561	12	12	118	117	QA	-1
OR4F6	0.0620059	1	1	34	34	ER.A	-1
OR1K1	0.0620381	3	3	40	40	ER.A	-1
ATP9B	0.0620425	11	11	120	120	QA	-1
LAYN	0.0620925	1	1	5	5	ER	0.00044127
KIF11	0.0621637	2	2	2	2	ER	0.0621637
CST5	0.062245	1	1	7	7	ER	0.000198378
RIC8B	0.0622803	3	3	60	60	QA	-1
CC2D1A	0.0622924	10	10	130	129	QA	-1
VANGL2	0.0624514	3	3	7	7	ER	0.000230572
ADAMTS9	0.0624878	19	19	136	135	QA	-1
CRYGB	0.0624887	2	2	2	2	ER	0.0624887
NFKBIB	0.062793	2	2	9	9	ER	3.76e-05
PPRC1	0.0628715	13	13	109	109	QA	-1
TP53INP2	0.0631907	1	1	7	7	ER	0.000116758
TRIM8	0.0632005	2	2	24	24	ER.A	-1
DRG2	0.0632158	3	3	4	4	ER	0.00118067
MMP11	0.0632415	4	4	6	6	ER	0.000321772
PYROXD2	0.0632872	9	9	50	50	QA	-1
SYCP3	0.0633797	2	2	17	17	ER	1.74e-10
KRT4	0.063385	4	4	69	68	QA	-1
CACNG7	0.0634463	4	4	16	16	ER	6.72e-10
SERPINB4	0.0635068	7	7	68	68	QA	-1
PPP1R12C	0.0635421	5	5	184	180	QA	-1
OR10S1	0.0636223	2	2	33	33	ER.A	-1
PLEKHA4	0.0636864	7	7	53	53	QA	-1
NUDT8	0.0637153	3	3	10	10	ER	4.17e-06
DUSP22	0.0641097	5	5	40	40	ER.A	-1
CPT1B	0.0642219	6	6	37	37	ER.A	-1
IKBKE	0.0643288	5	5	53	53	QA	-1
GIGYF2	0.0644126	2	2	20	20	ER	4.82e-12
POLR3A	0.0646789	8	8	13	13	ER	2.47e-08
PSMB4	0.0646928	2	2	2	2	ER	0.0646928
TRRAP	0.0647032	15	15	25	25	ER.A	-1
ATP6V1H	0.0647555	3	3	15	15	ER	2.5e-09
ESYT1	0.0648063	10	10	154	152	QA	-1
NDUFS1	0.0648198	11	11	117	115	QA	-1
MYOZ2	0.0649832	2	2	4	4	ER	0.000809276
ZNF70	0.0654167	1	1	3	3	ER	0.00503878
PER2	0.0656405	15	15	63	63	QA	-1
KCND2	0.0656845	4	4	7	7	ER	6.15e-05
LRPPRC	0.0657335	2	2	2	2	ER	0.0657335
HGFAC	0.0658068	4	3	43	43	QA	-1
FAM151B	0.0662014	2	2	2	2	ER	0.0662014
ADAT1	0.0662269	4	4	15	15	ER	1.68e-10
OR13C4	0.0663417	1	1	20	20	ER	2.22e-11
APOL6	0.0665338	4	4	29	29	ER.A	-1
GPATCH1	0.0666525	8	8	129	116	QA	-1
KIF18A	0.0667232	6	6	22	22	ER.A	-1
IRS1	0.0667592	9	9	106	106	QA	-1
SNX21	0.066796	6	6	90	89	QA	-1
PCDHA11	0.0668886	2	2	6	6	ER	0.000120503
FEN1	0.0670407	2	2	2	2	ER	0.0670407
2022-03-08	0.0671005	2	2	7	7	ER	4.37e-05
ALDH1A3	0.0672517	4	4	53	52	QA	-1
AMT	0.0672755	7	7	95	95	QA	-1
MAEL	0.0674772	5	5	38	38	ER.A	-1
FAM181B	0.0675775	1	1	22	22	ER.A	-1
C11orf82	0.0677955	4	4	11	11	ER	6.95e-07
KCNT1	0.0679218	10	10	30	30	ER.A	-1
CANX	0.0679536	3	3	4	4	ER	0.000905067
LCTL	0.0680817	4	4	10	10	ER	1.3e-06
SLC44A1	0.0681004	2	2	21	21	ER.A	-1
ZNF726	0.0681063	1	1	11	11	ER	6.29e-07
ATF4	0.0682095	3	3	4	4	ER	0.00201528
FUT10	0.0682217	7	7	81	81	QA	-1
ANKRD27	0.0683561	11	11	55	54	QA	-1
DSG2	0.0684774	7	6	28	28	ER.A	-1
ARHGAP1	0.0685111	3	3	36	35	ER.A	-1
ACPL2	0.068513	4	4	19	19	ER	4.37e-12
TSPAN17	0.0685374	6	6	52	52	QA	-1
TMEM135	0.0685577	2	2	8	8	ER	1.63e-05
CSRP3	0.0685851	4	4	5	5	ER	0.000667801
PERP	0.0686169	1	1	35	35	ER.A	-1
CANT1	0.0686864	1	1	3	3	ER	0.00538854
CLEC3A	0.0686885	2	2	7	7	ER	0.000374722
FOXRED2	0.0687033	7	7	65	65	QA	-1
AKTIP	0.0687626	2	2	31	31	ER.A	-1
EPCAM	0.068805	2	2	16	16	ER	1.41e-09
UROC1	0.068901	6	6	8	8	ER	9.09e-06
ERI3	0.0689061	2	2	2	2	ER	0.0689061
RBM11	0.0690523	7	7	82	82	QA	-1
ZNF778	0.0691322	15	15	111	111	QA	-1
ZNF691	0.0691357	1	1	12	12	ER	5.43e-08
PNN	0.0692154	2	2	45	43	QA	-1
STRN	0.0693188	6	6	32	32	ER.A	-1
FAM211B	0.0693284	3	3	83	82	QA	-1
NTN4	0.0694053	10	10	80	80	QA	-1
NDUFA12	0.0694649	2	2	3	3	ER	0.0188452
TEX14	0.0694828	10	10	65	65	QA	-1
CHST1	0.0695405	1	1	1	1	ER	0.0695405
ZNF592	0.0695538	9	9	98	98	QA	-1
CSMD1	0.0696375	34	34	344	316	QA	-1
SRGAP1	0.0697072	4	4	14	14	ER	2.9e-08
OR5H2	0.0697175	2	2	24	24	ER.A	-1
CARD9	0.0697996	1	1	1	1	ER	0.0697996
GAMT	0.0697996	1	1	1	1	ER	0.0697996
OR5F1	0.0698371	2	2	33	33	ER.A	-1
COIL	0.0698912	2	2	3	3	ER	0.00367913
DNAJC11	0.0699039	4	4	12	12	ER	3.29e-07
ANKRD52	0.0699942	3	3	64	64	QA	-1
ZNF141	0.0700603	2	2	17	17	ER	3.06e-09
ZFYVE9	0.0701935	4	4	75	75	QA	-1
KIAA1377	0.0702406	6	6	53	53	QA	-1
PDSS2	0.0702538	1	1	11	11	ER	7.92e-07
ABCC8	0.0702866	13	13	91	85	QA	-1
CRYBA1	0.0703216	1	1	4	4	ER	0.00716804
OR51D1	0.0703711	4	4	46	46	QA	-1
TTI1	0.07038	13	13	102	94	QA	-1
HARS2	0.0704165	4	4	5	5	ER	0.00609778
SLC12A9	0.0704541	5	5	11	11	ER	2.57e-08
CHST10	0.0704851	4	4	5	5	ER	0.000267124
ELFN2	0.07066	8	8	149	149	QA	-1
COQ2	0.0706603	2	2	10	10	ER	2.91e-06
CSRNP3	0.0708285	2	2	10	10	ER	5.24e-07
ALPK1	0.0710234	15	15	201	160	QA	-1
PTPN3	0.0712061	3	3	75	75	QA	-1
SAR1B	0.071277	2	2	3	3	ER	0.00901564
TTC6	0.0713	5	4	24	24	ER.A	-1
OR8A1	0.0713045	2	2	2	2	ER	0.0713045
TSR1	0.0713769	4	4	5	5	ER	0.00315624
GALNT18	0.0714554	7	7	91	91	QA	-1
FAM71A	0.0717286	3	3	48	48	QA	-1
LY6G6F	0.0717655	4	4	16	16	ER	1.37e-09
ELAVL2	0.0718561	2	2	5	5	ER	0.00037453
GANAB	0.071954	6	6	25	25	ER.A	-1
NMNAT3	0.0719967	2	2	2	2	ER	0.0719967
GRIK5	0.0721533	4	3	33	33	ER.A	-1
NFASC	0.0722705	18	17	49	46	QA	-1
ZNF687	0.0722977	9	9	71	68	QA	-1
C9orf135	0.0723123	4	4	24	24	ER.A	-1
SLC15A4	0.0724048	2	2	31	31	ER.A	-1
LRFN3	0.0724711	5	5	26	26	ER.A	-1
PRPSAP1	0.0725359	2	2	4	4	ER	0.000747572
FLYWCH1	0.0727266	6	5	7	7	ER	4.96e-05
PPP1R7	0.0727875	3	3	3	3	ER	0.0251263
KLHDC8B	0.0729907	2	2	7	7	ER	0.000217085
EVPL	0.0730149	18	18	255	126	QA	-1
FRMPD1	0.0731203	17	16	187	183	QA	-1
SETD8	0.073156	1	1	1	1	ER	0.073156
LRP8	0.0731812	2	2	34	34	ER.A	-1
TCF7	0.0732621	3	3	42	42	QA	-1
SELP	0.0733011	8	8	37	37	ER.A	-1
PLEKHA2	0.0733605	3	3	4	4	ER	0.00274567
BTBD2	0.0733747	4	4	56	55	QA	-1
CCNI	0.0736205	1	1	1	1	ER	0.0736205
NFKBIA	0.0736623	2	2	3	3	ER	0.00438044
GPR137B	0.0737462	4	4	66	66	QA	-1
CTDSPL	0.0739195	2	2	38	38	ER.A	-1
TATDN2	0.0739233	6	6	34	34	ER.A	-1
ATOH1	0.0741759	2	2	72	72	QA	-1
ZC3HC1	0.0743041	4	4	29	29	ER.A	-1
LDHAL6A	0.0745748	5	5	12	12	ER	3.56e-07
PPP1R3C	0.0746034	3	3	14	14	ER	8.08e-09
PFKL	0.0746337	11	11	109	106	QA	-1
PWP2	0.0747987	13	13	139	137	QA	-1
OR2A2	0.0748152	1	1	5	5	ER	0.000658708
CTNND2	0.0748757	10	10	23	23	ER.A	-1
RPF2	0.0749895	1	1	3	3	ER	0.00597304
STAC	0.0750601	4	4	15	15	ER	7.54e-09
C10orf12	0.0751948	5	5	18	18	ER	5.07e-11
PCMTD2	0.0751953	2	2	5	5	ER	0.000482226
FOPNL	0.0752158	1	1	1	1	ER	0.0752158
LTN1	0.0752792	6	6	6	6	ER	0.000749613
FAM174A	0.0753119	1	1	8	8	ER	1.1e-05
M1AP	0.0753237	9	9	68	68	QA	-1
ATG2A	0.0753626	8	8	16	16	ER	2.78e-09
SALL2	0.0753722	4	4	9	9	ER	1.12e-06
PI4K2B	0.0754287	1	1	2	2	ER	0.0754287
IGSF5	0.0754821	5	5	56	56	QA	-1
LOXL2	0.0756392	9	9	34	34	ER.A	-1
TXNDC15	0.0756569	3	3	7	7	ER	6.28e-05
DRD1	0.0757011	1	1	1	1	ER	0.0757011
MPPED1	0.0757011	1	1	1	1	ER	0.0757011
ANO5	0.0760154	12	12	55	55	QA	-1
MON1B	0.0760255	10	10	43	43	QA	-1
ECM1	0.0761027	2	2	7	7	ER	1.82e-05
SULT1E1	0.0762658	2	2	2	2	ER	0.0762658
IFIT2	0.0762899	2	2	2	2	ER	0.0762899
AJAP1	0.0765661	3	3	17	17	ER	6.72e-10
ZNF493	0.0768295	1	1	8	8	ER	1.51e-05
PLA2R1	0.0769793	10	10	65	65	QA	-1
DYRK4	0.077039	3	3	29	29	ER.A	-1
CAPN1	0.0771434	5	5	27	27	ER.A	-1
WDR35	0.0772235	18	18	124	123	QA	-1
MCAT	0.0772421	3	3	43	43	QA	-1
WDR89	0.0773794	7	7	33	33	ER.A	-1
IL36B	0.0774758	2	2	11	11	ER	2.68e-06
PCDHA7	0.0775246	5	5	118	116	QA	-1
ITGA9	0.0775746	8	8	26	26	ER.A	-1
MRPL13	0.0778211	1	1	3	3	ER	0.00635682
NCKIPSD	0.0778479	9	9	33	33	ER.A	-1
OSBPL8	0.0779568	3	3	6	6	ER	0.000476881
OR56B3P	0.0780587	2	2	2	2	ER	0.0780587
FIP1L1	0.0781225	2	2	2	2	ER	0.0781225
TUBGCP3	0.0781455	3	3	11	11	ER	5.88e-08
SLC37A2	0.0781518	5	5	22	22	ER.A	-1
SNTA1	0.0781773	3	3	4	4	ER	0.00103587
PRELP	0.0782723	4	4	26	26	ER.A	-1
ZGPAT	0.0782956	3	3	5	5	ER	0.000350166
NSMCE4A	0.0785998	1	1	1	1	ER	0.0785998
MMP17	0.0786389	3	3	23	23	ER.A	-1
PPP1R15B	0.0787865	5	5	23	23	ER.A	-1
COG3	0.0787922	4	4	33	33	ER.A	-1
GDAP2	0.0788916	7	7	38	37	ER.A	-1
C8orf58	0.0788982	3	3	28	28	ER.A	-1
IGSF9B	0.0790896	2	2	2	2	ER	0.0790896
IL21R	0.0790924	2	2	2	2	ER	0.0790924
ST6GALNAC5	0.0791429	2	2	10	10	ER	3.27e-06
WDR91	0.0791702	9	9	67	67	QA	-1
C1RL	0.0791983	1	1	32	32	ER.A	-1
CHRNE	0.0793447	5	5	97	96	QA	-1
NOX3	0.0794021	3	3	53	53	QA	-1
GRIN2A	0.0794743	13	13	113	111	QA	-1
ACSM2B	0.0794961	2	2	6	6	ER	3.03e-05
PTCH2	0.0795814	11	11	36	36	ER.A	-1
ALOX12B	0.0795925	5	5	52	52	QA	-1
PRKD2	0.0795925	7	7	85	78	QA	-1
NTN5	0.0798463	1	1	23	23	ER.A	-1
BDH2	0.0799597	3	3	30	30	ER.A	-1
CPM	0.0801585	4	4	95	95	QA	-1
GPR37L1	0.0802214	5	5	93	93	QA	-1
IQGAP2	0.0802535	16	16	124	124	QA	-1
RAB4A	0.0802776	1	1	6	6	ER	6.18e-05
WDR49	0.0806259	7	7	43	42	QA	-1
NOS2	0.0806559	3	3	7	7	ER	0.00010602
A3GALT2	0.080862	1	1	3	3	ER	0.0069074
MGAT5	0.0808683	5	4	20	20	ER	3.84e-12
C9orf41	0.0808821	3	3	3	3	ER	0.0086432
XIRP1	0.0809161	15	15	209	186	QA	-1
JAM2	0.0809178	1	1	42	42	QA	-1
LTA4H	0.0811416	2	2	3	3	ER	0.0144304
ATG2B	0.0811664	12	12	196	194	QA	-1
ADRB2	0.0812743	2	2	12	12	ER	1.19e-07
MMAA	0.0813152	1	1	1	1	ER	0.0813152
DCTN6	0.0814499	2	2	2	2	ER	0.0814499
MKRN3	0.0814694	4	4	7	7	ER	3.17e-05
ACADL	0.0814879	5	5	5	5	ER	0.00109198
PCDHB11	0.0815777	5	5	15	15	ER	2.05e-10
TMEM59L	0.0816355	4	3	21	21	ER.A	-1
ZNF613	0.081753	4	4	19	19	ER	2.94e-12
RABL6	0.0818214	10	10	157	152	QA	-1
CCDC27	0.0818217	4	4	18	18	ER	1.1e-11
POLE2	0.0818284	2	2	2	2	ER	0.0818284
ARL6IP5	0.0822808	4	4	37	37	ER.A	-1
SLC50A1	0.0822859	1	1	4	4	ER	0.00922082
ARRB2	0.082503	1	1	1	1	ER	0.082503
DDX17	0.082503	1	1	1	1	ER	0.082503
TMPRSS5	0.0826104	1	1	37	37	ER.A	-1
LNX1	0.0827252	7	7	18	18	ER	4.84e-10
REV3L	0.0827285	16	16	88	87	QA	-1
PDLIM7	0.0827556	1	1	1	1	ER	0.0827556
ZNF75A	0.0829004	1	1	1	1	ER	0.0829004
AMFR	0.0829458	6	6	78	78	QA	-1
RBBP6	0.0832929	11	11	33	33	ER.A	-1
KIAA2018	0.0834209	17	17	95	94	QA	-1
IL17RE	0.0835382	5	5	48	48	QA	-1
YJEFN3	0.0836133	1	1	1	1	ER	0.0836133
DUSP19	0.0837165	2	2	12	12	ER	9.78e-08
ZNF138	0.0837189	1	1	12	12	ER	7.57e-07
MYBPHL	0.0837816	9	9	41	41	QA	-1
UPK3A	0.0837825	4	4	69	69	QA	-1
OR4K5	0.0838344	3	3	34	34	ER.A	-1
GRIK3	0.0840781	7	7	9	9	ER	3.74e-06
ARL11	0.0841506	1	1	1	1	ER	0.0841506
NKX2-8	0.084353	1	1	1	1	ER	0.084353
DUSP11	0.0844457	1	1	1	1	ER	0.0844457
TMEM117	0.0844457	1	1	1	1	ER	0.0844457
CATSPER2	0.0844596	2	2	18	18	ER	4.59e-11
ASS1	0.0844693	1	1	50	50	QA	-1
DNER	0.0845816	8	8	23	23	ER.A	-1
C17orf74	0.0846423	2	2	8	8	ER	1.37e-05
DDRGK1	0.0846763	2	2	18	18	ER	7.86e-12
PTGER3	0.0848057	2	2	2	2	ER	0.0848057
PCDHA8	0.0849035	6	6	69	69	QA	-1
KIF5B	0.0849047	1	1	1	1	ER	0.0849047
HIST1H4A	0.0850441	1	1	64	63	QA	-1
PTGFR	0.0850777	4	4	31	31	ER.A	-1
TPRX1	0.0850981	1	1	12	12	ER	2e-07
FRMD4B	0.0851788	9	9	41	41	QA	-1
MYLK4	0.0852882	4	4	33	33	ER.A	-1
SARS	0.0855442	1	1	1	1	ER	0.0855442
SEC63	0.085639	1	1	1	1	ER	0.085639
CX3CR1	0.0856874	3	3	15	15	ER	4.83e-09
ADCK3	0.0858467	13	13	122	120	QA	-1
XRRA1	0.0858618	7	7	22	22	ER.A	-1
RNF157	0.086136	7	7	27	27	ER.A	-1
ROCK2	0.0862447	6	6	26	26	ER.A	-1
PRSS27	0.0864196	1	1	1	1	ER	0.0864196
PHF20	0.0866557	5	5	40	39	ER.A	-1
MBD4	0.0866874	12	12	42	40	QA	-1
MDFIC	0.0868181	4	4	13	13	ER	1.62e-09
ZNF416	0.0868952	3	3	23	23	ER.A	-1
FOXJ1	0.0870144	1	1	1	1	ER	0.0870144
APLF	0.087025	8	8	53	53	QA	-1
SALL4	0.0871601	7	7	11	11	ER	2.78e-07
F7	0.0872611	3	3	7	7	ER	5.74e-05
GUCY1A2	0.087516	5	5	9	9	ER	2.59e-06
KIAA0556	0.0875537	11	11	89	88	QA	-1
C16orf70	0.0875628	3	3	13	13	ER	2.33e-08
MND1	0.0876272	2	2	7	7	ER	7.34e-05
LRRC28	0.0877727	2	2	28	27	ER.A	-1
MFNG	0.0879256	1	1	13	13	ER	6.8e-08
FBXW4	0.0882736	1	1	52	52	QA	-1
LAIR1	0.0882887	4	4	5	5	ER	0.000316858
ANXA2R	0.0884289	1	1	18	18	ER	4.17e-11
LILRA1	0.0885154	3	3	26	26	ER.A	-1
C12orf49	0.0885491	1	1	1	1	ER	0.0885491
ZNF181	0.088556	3	3	14	14	ER	2.57e-09
SLC39A7	0.0886096	4	4	8	8	ER	1.25e-05
CHRNA6	0.0886334	2	2	46	46	QA	-1
STAM2	0.088652	2	2	4	4	ER	0.00202028
KLHDC3	0.0887814	1	1	2	2	ER	0.0887814
C17orf47	0.0888076	2	2	16	16	ER	6.53e-11
EPS15L1	0.0889699	6	6	44	44	QA	-1
RPUSD1	0.0889823	3	3	3	3	ER	0.0131136
QTRT1	0.0889974	2	2	2	2	ER	0.0232599
OGN	0.0890171	1	1	5	5	ER	0.000805193
KRTAP10-4	0.0891044	1	1	3	3	ER	0.00786269
FGD3	0.0891268	1	1	1	1	ER	0.0891268
CEP70	0.0892332	2	2	23	23	ER.A	-1
MICAL3	0.0892642	17	17	184	182	QA	-1
MS4A4A	0.0892738	1	1	9	9	ER	2.29e-06
PTPRCAP	0.0894163	1	1	1	1	ER	0.0894163
TRPM4	0.0894666	13	13	88	84	QA	-1
WDHD1	0.0895862	4	4	17	17	ER	5.95e-11
RGP1	0.0896839	2	1	31	31	ER.A	-1
DPY19L4	0.0898162	6	6	150	148	QA	-1
ZC3H4	0.0898939	2	2	4	4	ER	0.00242679
PDE4D	0.0899435	1	1	1	1	ER	0.0899435
RRAD	0.0899435	1	1	1	1	ER	0.0899435
PHTF2	0.0899838	2	2	12	12	ER	4.87e-08
IGSF6	0.0901597	3	3	6	6	ER	0.000178009
FGFR1OP	0.0903347	4	4	25	25	ER.A	-1
PCDHB2	0.0905017	3	3	30	30	ER.A	-1
FIGN	0.0905255	6	6	7	7	ER	8.96e-05
SNAPC5	0.0906566	2	2	38	19	ER.A	-1
FCER1A	0.0906686	1	1	18	18	ER	2.84e-10
CCDC9	0.0906933	6	6	6	5	ER	0.000297929
SLC24A5	0.0907588	2	2	13	12	ER	7.49e-07
GSS	0.0907723	5	5	68	68	QA	-1
SRP68	0.0908142	4	4	5	5	ER	0.00103798
APOPT1	0.0909369	1	1	1	1	ER	0.0909369
ZBTB48	0.0909875	3	3	11	11	ER	7.16e-08
ALKBH1	0.0910361	5	5	23	23	ER.A	-1
CCL22	0.0912234	1	1	1	1	ER	0.0912234
TMCC2	0.0913871	7	7	19	19	ER	1.66e-11
RLF	0.0914692	7	7	49	49	QA	-1
BRICD5	0.0914714	1	1	44	44	QA	-1
NEO1	0.0915285	10	10	97	96	QA	-1
YKT6	0.0915508	3	3	13	13	ER	1.06e-07
IQCC	0.0915863	5	5	9	9	ER	1.26e-05
KHK	0.0916315	1	1	3	3	ER	0.00797957
PGM5	0.0916626	3	3	4	4	ER	0.00605845
OSBP2	0.0916951	5	5	25	25	ER.A	-1
NR1H2	0.0917095	1	1	1	1	ER	0.0917095
LRRC10	0.0917459	3	3	21	21	ER.A	-1
HERC4	0.0917898	3	3	15	15	ER	1.14e-08
ADAMTSL2	0.0918804	1	1	2	2	ER	0.00416387
C14orf39	0.0918889	4	4	19	19	ER	7.44e-11
CTSK	0.0920784	3	3	35	34	ER.A	-1
CPT2	0.0921516	12	12	105	74	QA	-1
TNK1	0.0921953	3	3	28	27	ER.A	-1
GNPTG	0.0924624	2	2	47	47	QA	-1
PHLDB3	0.0925856	5	5	15	15	ER	2.26e-10
TRMT12	0.092669	3	3	16	16	ER	9.97e-09
GOT1	0.0926911	4	4	57	56	QA	-1
SLIT1	0.0928206	6	6	18	18	ER	3.81e-10
FAM53C	0.0930138	4	4	67	67	QA	-1
SLC40A1	0.093043	3	3	3	3	ER	0.00451477
MRGPRX3	0.0930859	5	5	24	24	ER.A	-1
RNF5	0.0931978	2	2	2	2	ER	0.019387
HKDC1	0.0932959	9	9	120	119	QA	-1
PARP12	0.0933456	2	2	5	5	ER	0.000556536
ZNF213	0.0934163	3	3	60	60	QA	-1
PLXNB2	0.093435	12	12	39	39	ER.A	-1
AIP	0.0934518	2	2	14	14	ER	2.45e-09
RAP1GAP2	0.0936271	3	3	21	21	ER.A	-1
UGT2B15	0.0937726	3	3	11	11	ER	1.59e-06
ARHGAP44	0.093826	3	3	3	3	ER	0.0126125
MGAT4B	0.0939038	8	8	28	28	ER.A	-1
BRCA1	0.0939042	19	19	113	112	QA	-1
MSH4	0.0940686	4	4	82	81	QA	-1
CSNK1G2	0.0940944	1	1	9	9	ER	4.62e-06
PIH1D1	0.0941213	2	2	18	18	ER	5.34e-11
PPP2R5B	0.0943483	1	1	1	1	ER	0.0943483
C9orf9	0.0943511	2	2	14	14	ER	2.46e-08
SNAP47	0.0943541	5	5	36	36	ER.A	-1
OTOP1	0.094403	3	3	20	20	ER	1.55e-11
TSNAXIP1	0.0948703	10	10	48	47	QA	-1
BTNL9	0.0952437	3	3	3	3	ER	0.00757007
MYH7B	0.0953628	7	7	100	100	QA	-1
RNF207	0.0953748	5	5	55	55	QA	-1
WDR41	0.0954477	1	1	9	9	ER	3.96e-06
RELL1	0.0954606	5	5	39	39	ER.A	-1
GRID2	0.0955269	11	11	85	84	QA	-1
ALOX12	0.0955348	6	6	46	46	QA	-1
PLAC9	0.09562	1	1	1	1	ER	0.09562
TPP2	0.0956671	4	4	10	10	ER	2.26e-06
CGN	0.0956703	12	12	36	36	ER.A	-1
CCNE2	0.0957062	3	3	43	43	QA	-1
CEP128	0.0958958	12	12	118	117	QA	-1
SSR3	0.0958999	2	2	4	4	ER	0.0016017
LCOR	0.0959181	5	4	15	15	ER	8.41e-09
AMZ2	0.095939	3	3	54	54	QA	-1
DGAT2	0.0959681	5	5	8	8	ER	2.36e-06
CEP44	0.096002	4	4	9	9	ER	1.57e-06
RAB27A	0.0960337	3	3	11	11	ER	2.83e-06
SPAG6	0.0960595	2	2	21	21	ER.A	-1
CDC37	0.0960762	1	1	1	1	ER	0.0960762
PLA2G2C	0.0962143	1	1	1	1	ER	0.0962143
GJA4	0.0962467	2	2	8	8	ER	4.52e-05
ASAH2	0.0962569	2	2	40	40	ER.A	-1
PDE6C	0.0963619	9	9	132	130	QA	-1
HNF4G	0.0964225	5	5	16	16	ER	1.03e-09
AVIL	0.096504	7	7	124	123	QA	-1
UNC13C	0.096535	18	18	145	144	QA	-1
ARMC4	0.0966143	2	2	3	3	ER	0.00695082
CDC73	0.0966743	3	3	3	3	ER	0.0327607
TSEN15	0.0966928	1	1	1	1	ER	0.0966928
TMEM39B	0.0967761	2	2	10	10	ER	8.52e-07
ASTN2	0.0969951	7	7	69	69	QA	-1
MNAT1	0.0970958	3	3	3	3	ER	0.00498068
TBCB	0.0970961	2	2	40	40	ER.A	-1
PHKG2	0.0971873	7	7	37	37	ER.A	-1
SH2D3A	0.0972004	5	5	48	48	QA	-1
POU5F2	0.0972925	2	2	7	7	ER	0.000114421
KANK2	0.0973151	11	11	123	122	QA	-1
CHAMP1	0.0973524	9	9	52	52	QA	-1
FAM124A	0.0973997	5	5	34	34	ER.A	-1
C10orf32	0.0974462	1	1	1	1	ER	0.0974462
TMEM56	0.0974694	2	2	5	5	ER	0.000516341
KIAA0391	0.0975562	4	4	34	33	ER.A	-1
PRDM13	0.0976049	3	3	4	4	ER	0.001747
C20orf26	0.0976287	9	9	87	87	QA	-1
TDRKH	0.0977654	7	7	12	12	ER	4.63e-08
CERS5	0.0978726	2	2	55	55	QA	-1
SLX4	0.0979148	18	18	255	251	QA	-1
USP53	0.0979405	6	5	30	30	ER.A	-1
SYDE1	0.0979844	1	1	9	9	ER	8.41e-06
CLCF1	0.0980013	1	1	13	13	ER	1.04e-07
PIP5K1C	0.0980183	4	4	6	6	ER	0.0002013
DCTN5	0.0980225	1	1	1	1	ER	0.0980225
PGD	0.0980428	5	5	61	60	QA	-1
SLC51B	0.0981435	1	1	3	3	ER	0.0092658
ZNF805	0.0983278	3	3	29	29	ER.A	-1
ANKAR	0.0983406	7	7	54	54	QA	-1
ADCY6	0.0983949	9	9	118	113	QA	-1
ETV7	0.0984467	8	8	80	80	QA	-1
JUNB	0.0984492	1	1	1	1	ER	0.0984492
MRPS33	0.0984858	1	1	2	2	ER	0.0984858
CLPP	0.0985151	1	1	20	20	ER	1.24e-12
PCDH1	0.0985297	7	7	63	63	QA	-1
RELA	0.0985457	4	4	15	15	ER	4.37e-09
TMEM198	0.0985592	5	5	88	88	QA	-1
OR8B8	0.0986788	5	5	59	59	QA	-1
DIEXF	0.0987126	5	5	18	18	ER	2.25e-11
STAT6	0.0988547	3	3	39	39	ER.A	-1
NELL1	0.0988619	19	17	183	180	QA	-1
VPS39	0.0989087	4	4	42	42	QA	-1
CLYBL	0.0989727	1	1	13	13	ER	1.09e-07
GFRA1	0.0990789	2	2	3	3	ER	0.0335632
MTRF1	0.0992015	3	3	23	23	ER.A	-1
ZNF587	0.0992438	1	1	5	5	ER	0.00118276
NPNT	0.0992479	7	7	20	20	ER	2.34e-12
NLGN2	0.0993966	4	4	43	43	QA	-1
ZNF765	0.0995712	3	3	8	8	ER	1.56e-05
CHD2	0.099629	2	2	13	13	ER	4.46e-08
ATE1	0.0996842	4	4	32	32	ER.A	-1
ANKRD13D	0.099749	3	3	8	8	ER	2.11e-05
PGLYRP1	0.099751	1	1	25	25	ER.A	-1
ARSG	0.0997881	10	10	94	93	QA	-1
SCARA5	0.0998797	2	2	8	8	ER	3.34e-05
IL18BP	0.0999047	2	2	27	27	ER.A	-1
CXCL10	0.0999998	1	1	1	1	ER	0.0999998
RPAIN	0.100051	1	1	1	1	ER	0.100051
WDR65	0.100053	8	8	117	115	QA	-1
C3orf58	0.100104	1	1	70	70	QA	-1
CTNNA2	0.100155	2	2	4	4	ER	0.00203413
MAK16	0.100169	1	1	1	1	ER	0.100169
THG1L	0.100238	6	6	46	46	QA	-1
INPP5B	0.10031	8	8	20	20	ER	9.62e-12
FPR2	0.100492	3	3	21	21	ER.A	-1
GFRA3	0.100531	2	2	5	5	ER	0.000726934
ZNF607	0.10074	10	10	37	37	ER.A	-1
NLGN1	0.100793	3	3	3	3	ER	0.0338884
LRP5L	0.100797	5	5	36	35	ER.A	-1
TBC1D23	0.101114	3	3	3	3	ER	0.00513705
CAPS2	0.101189	4	4	64	64	QA	-1
CCL21	0.101248	1	1	1	1	ER	0.101248
FAM3D	0.101248	1	1	1	1	ER	0.101248
ADAM10	0.101304	1	1	1	1	ER	0.101304
AIF1L	0.101328	2	2	30	30	ER.A	-1
MKLN1	0.101388	3	3	14	14	ER	8.39e-08
APEX1	0.101512	1	1	5	5	ER	0.00112076
ZNF439	0.101542	4	4	4	4	ER	0.0082839
FCHSD1	0.101664	3	3	3	3	ER	0.0131098
HSDL1	0.10178	1	1	1	1	ER	0.10178
DPCR1	0.101814	2	2	2	2	ER	0.101814
IL2RB	0.101827	1	1	1	1	ER	0.101827
AK5	0.10198	1	1	24	23	ER.A	-1
PKHD1	0.102022	45	45	443	377	QA	-1
PRSS57	0.10204	2	2	4	4	ER	0.00296839
FBLN1	0.102061	2	2	5	5	ER	0.00289633
OR5L1	0.102082	1	1	2	2	ER	0.102082
PWWP2A	0.102257	2	2	10	10	ER	9.88e-06
HK3	0.102258	20	20	200	197	QA	-1
TCF23	0.102277	1	1	5	5	ER	0.00200456
PRPF38B	0.102705	2	2	2	2	ER	0.0323718
MYO9A	0.102763	16	15	157	156	QA	-1
NEK9	0.102786	5	5	77	77	QA	-1
FMNL1	0.102885	3	3	4	4	ER	0.00512534
BBS9	0.102933	9	9	112	112	QA	-1
NLE1	0.102942	5	5	47	47	QA	-1
MLNR	0.102956	2	2	18	18	ER	1.36e-10
OR4D1	0.102979	4	4	32	32	ER.A	-1
TNFRSF17	0.102981	2	2	2	2	ER	0.0252717
TBK1	0.103009	1	1	50	50	QA	-1
CYP27B1	0.103025	1	1	5	5	ER	0.00122636
UBE2J2	0.103039	1	1	10	10	ER	6.34e-07
SOX30	0.10304	7	7	135	132	QA	-1
NCAN	0.103157	9	9	24	24	ER.A	-1
SYNJ1	0.103323	11	11	99	97	QA	-1
GSE1	0.1035	16	16	80	80	QA	-1
KRT82	0.103522	8	8	69	67	QA	-1
STAG1	0.103524	2	2	2	2	ER	0.0337246
TUBE1	0.103566	3	3	50	50	QA	-1
FAM184A	0.103589	9	9	72	72	QA	-1
NOXRED1	0.103639	2	2	4	4	ER	0.0110445
DCLRE1B	0.103648	4	4	9	9	ER	2.88e-06
IFLTD1	0.103851	3	3	16	16	ER	9.1e-10
STOML1	0.103944	1	1	1	1	ER	0.103944
TBATA	0.104006	7	7	90	90	QA	-1
GTF2I	0.10414	1	1	1	1	ER	0.10414
ZBTB41	0.104239	4	4	17	17	ER	2.23e-10
KCNN3	0.104404	2	2	41	41	QA	-1
SHQ1	0.104466	6	6	20	20	ER	4e-12
WTIP	0.10448	5	5	16	16	ER	7.49e-10
ATP8A1	0.104628	5	5	56	56	QA	-1
PCF11	0.104631	9	9	42	42	QA	-1
RP11-144F15.1	0.104661	1	1	1	1	ER	0.104661
ZC3H10	0.104842	1	1	1	1	ER	0.104842
NOTCH2	0.104861	9	9	63	63	QA	-1
A4GALT	0.104968	1	1	1	1	ER	0.104968
PRG2	0.105071	4	4	23	23	ER.A	-1
PPP1R36	0.105221	1	1	37	37	ER.A	-1
RIOK1	0.105345	4	4	84	84	QA	-1
AP1G2	0.105369	7	7	85	85	QA	-1
ST6GALNAC1	0.105391	3	3	50	50	QA	-1
TMIGD2	0.105509	3	3	23	23	ER.A	-1
ALG3	0.105519	3	3	46	46	QA	-1
ZNF333	0.105535	2	2	11	11	ER	1.01e-06
WNT8A	0.105562	2	2	2	2	ER	0.105562
DDX55	0.105661	2	2	39	38	ER.A	-1
RNF8	0.105795	1	1	10	10	ER	6.8e-07
ST20	0.105959	2	2	16	16	ER	7.46e-10
CCDC174	0.105979	3	3	42	41	QA	-1
CEP85L	0.106008	7	7	62	62	QA	-1
CCDC77	0.106041	9	9	106	106	QA	-1
TRIAP1	0.106076	2	2	76	76	QA	-1
FH	0.106217	1	1	1	1	ER	0.106217
TMEM217	0.106332	2	2	57	57	QA	-1
HIPK4	0.106367	5	5	62	62	QA	-1
NUDCD2	0.106567	2	2	3	3	ER	0.00780323
NR1H3	0.106746	5	5	10	10	ER	2.15e-06
MYBPH	0.106841	1	1	27	27	ER.A	-1
C1QL4	0.106845	1	1	5	5	ER	0.00116843
KCNN2	0.106858	2	2	2	2	ER	0.0249976
DAP3	0.106888	6	6	159	158	QA	-1
CCDC125	0.106999	4	4	54	54	QA	-1
TXLNB	0.107063	8	8	38	38	ER.A	-1
MYEF2	0.107073	2	2	21	21	ER.A	-1
PEMT	0.107079	2	2	2	2	ER	0.0317677
AADACL2	0.107104	4	4	90	90	QA	-1
ZSCAN5B	0.107199	3	3	10	10	ER	1.36e-05
SPTLC3	0.107227	3	3	11	11	ER	1.22e-07
BCKDK	0.107333	1	1	66	66	QA	-1
SEMA7A	0.107344	3	3	29	29	ER.A	-1
ARFGAP2	0.107356	3	3	109	109	QA	-1
TRAM1L1	0.107413	4	4	5	5	ER	0.000789064
HGSNAT	0.107478	3	2	21	21	ER.A	-1
SLC24A3	0.107526	8	8	15	15	ER	6.87e-10
NODAL	0.107628	2	2	12	12	ER	2.49e-07
DNASE1	0.10781	6	6	16	16	ER	1.1e-09
SUV420H2	0.107956	2	2	42	42	QA	-1
C5AR1	0.107991	4	4	7	7	ER	6.12e-05
U2SURP	0.108093	2	2	3	3	ER	0.00664634
CIT	0.108164	14	14	104	102	QA	-1
C9orf152	0.108257	2	2	8	8	ER	1.47e-05
P2RY6	0.108388	6	6	13	13	ER	2.7e-09
CRISP2	0.108438	1	1	5	5	ER	0.00177171
DEFB113	0.108438	1	1	5	5	ER	0.00177171
ZDHHC8	0.108556	5	5	39	39	ER.A	-1
PLEKHH3	0.108558	1	1	1	1	ER	0.108558
TBC1D7	0.108558	1	1	1	1	ER	0.108558
COL8A1	0.108565	5	5	104	103	QA	-1
FAM83B	0.108577	7	7	75	74	QA	-1
CLDN10	0.10859	3	3	21	21	ER.A	-1
CUX1	0.108593	7	7	34	34	ER.A	-1
FLT3LG	0.108611	1	1	1	1	ER	0.108611
FAM120B	0.108614	4	4	36	35	ER.A	-1
CYLC2	0.108686	5	5	41	41	QA	-1
COL4A2	0.108696	1	1	1	1	ER	0.108696
MEP1A	0.108916	2	2	2	2	ER	0.0194249
COL4A3BP	0.109022	3	3	16	16	ER	3.64e-10
TLL2	0.109098	12	12	79	75	QA	-1
CA9	0.109246	1	1	4	4	ER	0.000777371
ZNF215	0.109261	6	6	37	37	ER.A	-1
TRIM24	0.109389	3	3	61	61	QA	-1
SP140L	0.10957	3	3	3	3	ER	0.00599377
SUCO	0.109624	4	4	17	17	ER	6.12e-10
SYDE2	0.109676	5	5	25	25	ER.A	-1
NHLRC1	0.109776	2	2	2	2	ER	0.0242244
MYCN	0.109967	2	2	2	2	ER	0.025062
SERINC1	0.110068	4	4	63	63	QA	-1
TPSG1	0.110121	3	3	3	3	ER	0.0140578
HIST1H2BF	0.110145	2	2	2	2	ER	0.0250715
C17orf77	0.110498	1	1	3	3	ER	0.00872819
SLC9A3R1	0.110498	1	1	3	3	ER	0.00872819
GDPD5	0.110537	4	4	39	38	ER.A	-1
SH3BP1	0.110572	4	4	10	10	ER	6.45e-06
RRP15	0.110574	5	5	76	76	QA	-1
FAM122A	0.110589	2	2	120	120	QA	-1
RXFP1	0.11086	5	5	6	6	ER	4.83e-05
NMI	0.11094	2	2	15	15	ER	1.96e-09
DYNC2LI1	0.110965	3	3	7	7	ER	7.61e-05
ITGA8	0.110992	5	5	7	7	ER	5.86e-05
UCP3	0.111254	4	4	21	21	ER.A	-1
MORC1	0.111316	5	5	21	21	ER.A	-1
WDR75	0.111396	3	3	11	11	ER	8.96e-07
CEL	0.1114	1	1	1	1	ER	0.1114
IL1F10	0.11146	1	1	1	1	ER	0.11146
REM1	0.111557	6	6	23	23	ER.A	-1
CATSPER4	0.111695	3	3	29	29	ER.A	-1
PDE7A	0.111741	1	1	1	1	ER	0.111741
ASPH	0.111761	1	1	1	1	ER	0.111761
ZNF337	0.111867	15	15	126	123	QA	-1
AC040977.1	0.111886	1	1	20	20	ER	1.49e-11
KNOP1	0.111972	4	4	47	47	QA	-1
ITGAD	0.112101	12	11	73	73	QA	-1
STRC	0.112159	1	1	1	1	ER	0.112159
POU2F1	0.112219	11	11	90	90	QA	-1
OR7A10	0.112333	1	1	1	1	ER	0.112333
PDE4C	0.112387	3	3	15	15	ER	1.49e-09
C5orf20	0.112457	1	1	3	3	ER	0.0119282
AKIP1	0.112508	2	2	9	9	ER	7.97e-07
CDH10	0.11262	3	3	14	14	ER	9.01e-10
SLC36A2	0.112625	3	3	13	13	ER	1.41e-08
FAM173A	0.112639	1	1	1	1	ER	0.112639
HCRTR1	0.112647	4	4	202	199	QA	-1
ATXN10	0.112696	5	5	19	19	ER	1.69e-11
VASH1	0.112773	1	1	1	1	ER	0.112773
CTSW	0.112804	10	10	107	107	QA	-1
PYDC2	0.112936	1	1	57	57	QA	-1
CD163	0.112993	6	6	56	56	QA	-1
HDLBP	0.11309	5	5	17	17	ER	4.29e-10
NT5C	0.113153	1	1	1	1	ER	0.113153
KCNN1	0.113238	1	1	1	1	ER	0.113238
SGOL1	0.113303	1	1	1	1	ER	0.113303
SCTR	0.11333	4	4	18	18	ER	5.58e-11
HR	0.11334	11	11	59	59	QA	-1
C1orf210	0.113423	3	3	47	47	QA	-1
C2orf16	0.113431	12	12	132	127	QA	-1
ZNF772	0.113443	10	10	77	77	QA	-1
SCN2A	0.113464	5	5	56	55	QA	-1
BTBD9	0.113569	6	6	52	52	QA	-1
REC8	0.114151	5	5	23	23	ER.A	-1
GPRIN1	0.114176	6	6	45	44	QA	-1
EEA1	0.114322	5	5	17	17	ER	2.1e-11
SSBP4	0.114466	1	1	1	1	ER	0.114466
FAM162A	0.114597	2	1	1	1	ER	0.114597
HNRNPDL	0.114597	1	1	1	1	ER	0.114597
NAV1	0.114701	19	18	116	110	QA	-1
DEFB118	0.114795	1	1	71	71	QA	-1
PLA2G4F	0.11483	8	8	127	127	QA	-1
CCDC14	0.114865	4	4	41	41	QA	-1
DLG5	0.114866	10	10	122	121	QA	-1
SLC6A3	0.114941	7	6	32	32	ER.A	-1
CLCN2	0.114951	14	14	174	172	QA	-1
SYT16	0.114964	6	6	68	68	QA	-1
MEPE	0.115007	1	1	1	1	ER	0.115007
KIAA1407	0.115068	10	10	117	114	QA	-1
RNF103	0.115105	5	5	41	41	QA	-1
PRRC2C	0.115164	12	11	129	128	QA	-1
KRT12	0.11519	4	4	58	58	QA	-1
PIK3C2A	0.115253	7	7	33	33	ER.A	-1
KIAA1429	0.11539	10	10	43	43	QA	-1
TOM1	0.115417	9	9	99	99	QA	-1
SYT11	0.115424	2	2	84	83	QA	-1
OR8H1	0.115631	1	1	1	1	ER	0.115631
UBXN7	0.115631	1	1	1	1	ER	0.115631
UQCRC2	0.115661	2	2	5	5	ER	0.00368719
VPS72	0.115728	2	2	2	2	ER	0.0312188
CCDC146	0.115818	7	7	137	136	QA	-1
CAPNS1	0.115833	3	3	7	7	ER	0.00021715
CLRN1	0.115874	4	4	46	45	QA	-1
TMEM161B	0.116042	2	2	6	6	ER	0.000442247
C1GALT1	0.116171	2	2	2	2	ER	0.0216917
TRIM4	0.116195	4	4	19	19	ER	7.72e-12
CYBA	0.116229	1	1	1	1	ER	0.116229
E2F3	0.116229	1	1	1	1	ER	0.116229
AURKA	0.116255	1	1	1	1	ER	0.116255
SH2D6	0.116255	1	1	1	1	ER	0.116255
SPATA5	0.116432	2	2	3	3	ER	0.0273899
LRRC32	0.116438	4	4	19	19	ER	5.25e-12
SPINK9	0.116579	1	1	6	6	ER	0.00020503
KIF3A	0.116658	1	1	1	1	ER	0.116658
CTSZ	0.116661	2	2	18	18	ER	5.02e-11
NKX6-1	0.116661	2	2	2	1	ER	0.116661
STEAP4	0.116661	1	1	1	1	ER	0.116661
EIF2A	0.116752	2	2	2	2	ER	0.0233798
TNFRSF14	0.116785	2	2	2	2	ER	0.0270034
ZNF699	0.116832	2	2	6	6	ER	0.000477388
C20orf27	0.116853	2	2	2	2	ER	0.0305724
NUAK2	0.116939	5	5	10	10	ER	9.05e-06
TRUB2	0.117122	4	4	7	7	ER	0.000103797
SOX11	0.117203	1	1	1	1	ER	0.117203
HMGCL	0.117313	1	1	6	6	ER	0.000176454
DDX27	0.117336	10	10	40	40	ER.A	-1
PTDSS2	0.117424	2	2	55	55	QA	-1
CRB1	0.117525	20	20	176	176	QA	-1
APEH	0.117574	8	8	91	91	QA	-1
MAP4K4	0.11767	4	3	28	28	ER.A	-1
OR6C1	0.117672	3	3	10	10	ER	1.07e-06
CD248	0.117694	5	5	72	71	QA	-1
ZMYND19	0.117716	1	1	1	1	ER	0.117716
PIGG	0.117805	6	6	43	43	QA	-1
HSD3B2	0.117925	1	1	1	1	ER	0.117925
PTPN18	0.118025	5	4	18	18	ER	7.78e-11
CSTL1	0.118242	2	2	5	5	ER	0.00259925
DBX2	0.118274	2	2	46	46	QA	-1
PGAP1	0.118288	2	2	5	5	ER	0.000338446
EME2	0.118305	3	3	12	12	ER	5.73e-07
MMS19	0.118348	5	5	57	56	QA	-1
TLR3	0.118431	4	4	48	48	QA	-1
ESPN	0.11865	4	4	16	16	ER	2.4e-10
ZNF506	0.118769	1	1	3	3	ER	0.0126372
AP3M2	0.11878	8	8	18	18	ER	1.31e-10
FAM209A	0.119021	1	1	1	1	ER	0.119021
HTR5A-AS1	0.119021	1	1	1	1	ER	0.119021
SNF8	0.119021	1	1	1	1	ER	0.119021
PENK	0.119041	4	4	39	39	ER.A	-1
FOXA3	0.119147	3	3	3	3	ER	0.0107723
MYBPC2	0.119236	10	10	87	85	QA	-1
SOCS1	0.119324	2	2	5	5	ER	0.000963907
IBTK	0.119377	8	8	66	66	QA	-1
CCNL2	0.119624	4	4	13	13	ER	2.4e-08
TRPM7	0.119636	5	5	12	12	ER	1.08e-08
SYNE4	0.119686	1	1	1	1	ER	0.119686
HIST1H3E	0.119719	1	1	6	6	ER	0.000143475
STAG3	0.11972	2	2	24	24	ER.A	-1
ZNF808	0.119735	5	5	5	5	ER	0.000811803
NUPL1	0.119797	3	3	42	41	QA	-1
AHSA1	0.1199	2	2	3	3	ER	0.028198
LRRC52	0.119924	6	6	27	27	ER.A	-1
OR51F2	0.120016	3	3	49	49	QA	-1
RBL1	0.120034	3	3	6	6	ER	0.000108514
ZSCAN20	0.12011	12	12	25	25	ER.A	-1
CYB5D2	0.120321	3	3	62	62	QA	-1
KLHL17	0.120347	10	10	64	63	QA	-1
DAAM2	0.120363	11	10	143	141	QA	-1
KPNA2	0.120367	4	4	27	27	ER.A	-1
CNTD2	0.120416	1	1	1	1	ER	0.120416
CLTC	0.120433	4	4	7	7	ER	0.000231253
IFNAR1	0.120802	3	2	9	9	ER	1.02e-05
ALOX15B	0.120812	10	10	73	73	QA	-1
SCAF11	0.120819	9	9	63	63	QA	-1
LONRF1	0.121012	2	2	37	37	ER.A	-1
NLRP8	0.12104	8	8	64	64	QA	-1
CYP2A7	0.121086	1	1	1	1	ER	0.121086
KBTBD13	0.121086	1	1	1	1	ER	0.121086
MOAP1	0.121086	2	1	1	1	ER	0.121086
GCM2	0.121292	2	2	4	4	ER	0.000613984
YWHAE	0.121408	1	1	38	38	ER.A	-1
PER1	0.121456	10	10	18	18	ER	1.1e-11
POLD2	0.121544	5	5	76	75	QA	-1
PRB3	0.121551	1	1	15	15	ER	3.56e-09
BSDC1	0.1216	3	3	5	5	ER	0.000854779
ELP3	0.121601	1	1	1	1	ER	0.121601
UAP1L1	0.121601	1	1	1	1	ER	0.121601
FAM13B	0.122069	6	6	55	55	QA	-1
GPR31	0.122111	5	5	19	19	ER	7.61e-13
HSD17B12	0.122113	3	3	16	16	ER	3.94e-10
MKNK2	0.122215	4	4	15	15	ER	3.58e-09
CCAR2	0.122306	9	9	25	25	ER.A	-1
CLASP1	0.122668	6	6	34	34	ER.A	-1
SFXN2	0.122689	4	4	65	65	QA	-1
ALDOC	0.122878	1	1	1	1	ER	0.122878
RUVBL1	0.122878	1	1	1	1	ER	0.122878
CYP4F11	0.123157	4	3	6	6	ER	0.000511643
GPR25	0.12316	1	1	6	6	ER	0.000303269
KCNG1	0.123198	2	2	2	2	ER	0.0268052
ZNF184	0.123232	4	4	5	5	ER	0.00102657
ANKS1A	0.123253	7	7	20	20	ER	4.83e-12
SMC3	0.123286	1	1	1	1	ER	0.123286
PKD2	0.123361	6	6	86	86	QA	-1
DNAI1	0.123387	12	12	181	180	QA	-1
C1orf64	0.12346	1	1	1	1	ER	0.12346
LFNG	0.123474	3	3	21	21	ER.A	-1
AGO4	0.123524	1	1	1	1	ER	0.123524
BSND	0.123934	1	1	4	3	ER	0.00475605
PLEK2	0.124043	2	2	11	11	ER	4.9e-07
EGF	0.12412	8	8	45	45	QA	-1
TFPI	0.124138	2	2	23	23	ER.A	-1
LDHD	0.124154	2	2	4	4	ER	0.00389602
SORD	0.124158	2	2	34	34	ER.A	-1
NKD2	0.124217	3	3	9	9	ER	4e-07
RASSF3	0.124298	1	1	1	1	ER	0.124298
PCOLCE	0.124319	2	2	2	2	ER	0.0231575
SRPRB	0.124397	3	3	72	72	QA	-1
SLC16A12	0.124429	6	6	145	145	QA	-1
ABLIM3	0.124569	12	12	55	55	QA	-1
RAPGEF1	0.124587	12	12	156	127	QA	-1
CCDC80	0.12468	6	6	33	33	ER.A	-1
TMEM53	0.124696	1	1	10	10	ER	2.76e-06
XPO7	0.124837	5	5	12	12	ER	1.61e-07
TXNDC16	0.124908	5	5	36	36	ER.A	-1
SLC26A3	0.124916	10	10	13	13	ER	2.4e-08
AGPAT2	0.124969	6	6	18	18	ER	3.18e-11
PARD3B	0.125113	12	12	79	78	QA	-1
VPS33B	0.125157	6	6	15	15	ER	3.33e-10
PSMB1	0.125235	1	1	1	1	ER	0.125235
KRTAP24-1	0.125293	1	1	3	3	ER	0.0130312
UGT1A10	0.125316	2	2	54	53	QA	-1
EPHB4	0.125378	6	6	59	59	QA	-1
DCUN1D5	0.125471	2	2	8	8	ER	1.42e-05
PTPN13	0.125561	20	20	213	207	QA	-1
ATP2A1	0.125565	9	9	22	22	ER.A	-1
AHCYL2	0.12574	2	2	2	2	ER	0.0356322
DNMT3L	0.125941	3	3	77	76	QA	-1
TALDO1	0.12606	1	1	3	3	ER	0.0142436
LTK	0.126071	8	8	53	53	QA	-1
EVC	0.12614	14	14	158	156	QA	-1
OTX1	0.126143	1	1	1	1	ER	0.126143
GNPTAB	0.126178	12	12	65	65	QA	-1
DPP9	0.126234	4	4	7	7	ER	7.87e-05
SLPI	0.126237	1	1	50	50	QA	-1
PPFIBP2	0.126318	8	8	41	41	QA	-1
SSMEM1	0.126323	1	1	23	23	ER.A	-1
MAN1A2	0.126332	6	6	37	37	ER.A	-1
C10orf120	0.126372	2	2	33	33	ER.A	-1
APOBEC4	0.126375	1	1	6	6	ER	0.000361611
VRK3	0.126445	3	3	32	32	ER.A	-1
SDCBP	0.126573	1	1	1	1	ER	0.126573
TMEM181	0.12665	1	1	1	1	ER	0.12665
TRNAU1AP	0.126727	1	1	1	1	ER	0.126727
RNF10	0.126733	3	3	20	20	ER	1.62e-13
WFDC5	0.126737	3	3	12	12	ER	7.16e-07
CCKAR	0.126739	7	7	53	52	QA	-1
SCD	0.126779	1	1	7	7	ER	1.42e-05
STARD13	0.126852	10	10	54	54	QA	-1
EPN3	0.126935	9	8	52	48	QA	-1
CTNNBIP1	0.126966	1	1	7	7	ER	1.42e-05
HINFP	0.127069	3	3	17	17	ER	8.07e-10
PSMD2	0.127129	7	7	8	8	ER	2.58e-05
TP63	0.127196	4	4	27	27	ER.A	-1
C19orf12	0.127357	3	3	23	23	ER.A	-1
SLC35D2	0.127358	1	1	6	6	ER	0.000357495
SDC2	0.127415	1	1	1	1	ER	0.127415
SH3BP5	0.127427	5	5	30	30	ER.A	-1
SRD5A1	0.127441	2	2	23	23	ER.A	-1
SUPT3H	0.127471	3	3	12	12	ER	1.01e-07
AKR1C1	0.127515	1	1	3	3	ER	0.0144322
SPATA2L	0.127533	1	1	1	1	ER	0.127533
ZW10	0.127575	6	6	36	36	ER.A	-1
EPHB1	0.127576	6	6	59	59	QA	-1
OR2M4	0.127577	2	2	2	2	ER	0.0225112
PIGQ	0.127697	4	4	14	14	ER	6.75e-09
COL21A1	0.127853	6	6	23	22	ER.A	-1
CLIC6	0.127941	2	2	2	2	ER	0.0278136
ST8SIA1	0.128032	1	1	1	1	ER	0.128032
CD1A	0.128085	8	8	115	114	QA	-1
XPO6	0.12824	7	7	46	46	QA	-1
NDST2	0.128448	13	13	75	75	QA	-1
KRTAP27-1	0.128453	3	3	5	5	ER	0.00101388
BIRC2	0.128505	3	3	28	28	ER.A	-1
HIPK2	0.128555	6	6	16	16	ER	1.02e-10
ASPA	0.128629	3	3	92	92	QA	-1
ANGEL2	0.128747	3	3	11	11	ER	3.4e-07
MOCS1	0.128774	7	7	25	22	ER.A	-1
ARHGEF18	0.128899	9	9	47	47	QA	-1
PIK3AP1	0.128937	3	3	49	48	QA	-1
PSME4	0.128945	6	6	8	8	ER	2.48e-05
RNF19A	0.129051	5	5	43	43	QA	-1
IVNS1ABP	0.129113	3	3	6	6	ER	6.25e-05
EVX2	0.129206	3	3	17	17	ER	2.13e-10
OTP	0.129229	1	1	17	17	ER	4.33e-11
OCA2	0.129277	8	8	205	202	QA	-1
TMEM9B	0.129367	1	1	3	3	ER	0.0143963
KRT38	0.129387	2	2	4	4	ER	0.00356857
MRTO4	0.129412	3	3	54	54	QA	-1
C9orf91	0.129445	1	1	10	10	ER	2.6e-06
HPS3	0.129551	7	7	29	29	ER.A	-1
ATP4B	0.129586	1	1	1	1	ER	0.129586
PPTC7	0.129586	1	1	1	1	ER	0.129586
CPEB3	0.129588	3	3	22	22	ER.A	-1
GIT2	0.1296	7	6	114	113	QA	-1
TRIML1	0.129721	3	3	22	22	ER.A	-1
SLC7A6	0.130074	6	6	37	37	ER.A	-1
CNPY4	0.130175	1	1	1	1	ER	0.130175
MFAP1	0.130259	4	4	11	11	ER	5.52e-07
RNF182	0.13031	2	2	10	10	ER	1.74e-05
DDX21	0.130343	1	1	1	1	ER	0.130343
B4GALT6	0.130347	4	4	73	73	QA	-1
NAA25	0.130643	4	4	39	39	ER.A	-1
ANK2	0.130672	28	28	105	97	QA	-1
POGK	0.13069	7	7	72	72	QA	-1
TUBA4A	0.130704	2	2	2	2	ER	0.0303867
NRG2	0.130819	7	7	59	59	QA	-1
RBCK1	0.130902	1	1	16	16	ER	1.22e-09
UBE2Q2	0.130953	2	2	12	12	ER	3.59e-08
ODF3	0.131009	3	3	4	4	ER	0.00236223
CD48	0.131118	3	3	8	8	ER	1.63e-05
BAI1	0.131273	4	3	41	41	QA	-1
TMBIM4	0.131275	2	2	15	15	ER	1.36e-08
CDK5RAP1	0.131287	5	5	73	72	QA	-1
AIPL1	0.131314	6	6	90	89	QA	-1
RASGRP1	0.131335	4	4	4	4	ER	0.00529297
ARMC1	0.13148	2	2	12	12	ER	3.11e-07
FDPS	0.131593	1	1	22	22	ER.A	-1
MTL5	0.131617	4	4	43	42	QA	-1
FLRT1	0.131629	8	8	17	17	ER	2.68e-10
FANCF	0.13165	1	1	6	6	ER	0.000437757
FAM168A	0.131837	1	1	1	1	ER	0.131837
PRKAA2	0.131921	2	2	3	3	ER	0.00998485
SETDB2	0.131929	2	2	2	2	ER	0.024408
ZNF704	0.131943	3	3	3	3	ER	0.0149769
NEBL	0.131968	4	4	36	36	ER.A	-1
GOLGA5	0.132169	7	7	31	31	ER.A	-1
JAKMIP1	0.132175	6	6	20	20	ER	1.13e-12
L3MBTL1	0.132274	3	3	3	3	ER	0.014556
CNIH4	0.13234	3	3	84	84	QA	-1
TMPRSS11F	0.132373	5	5	46	46	QA	-1
RPL11	0.132388	1	1	1	1	ER	0.132388
LARP4	0.132494	5	5	24	24	ER.A	-1
TNIP3	0.132619	1	1	1	1	ER	0.132619
NUMBL	0.132646	1	1	6	6	ER	0.000786827
TBRG4	0.132691	2	2	7	7	ER	6.17e-05
HAND1	0.132727	1	1	61	61	QA	-1
POLR1E	0.132743	6	6	130	130	QA	-1
LPXN	0.132768	4	4	11	11	ER	1.47e-06
MUT	0.132889	5	5	54	53	QA	-1
KCNJ11	0.133047	1	1	1	1	ER	0.133047
MBD1	0.133049	2	2	2	2	ER	0.0410942
GCM1	0.133079	4	4	21	21	ER.A	-1
TNR	0.133115	10	10	72	71	QA	-1
STAT1	0.133388	1	1	1	1	ER	0.133388
IGFBP5	0.133643	1	1	11	11	ER	5.68e-07
HECTD1	0.133779	13	13	62	62	QA	-1
GRB7	0.133806	8	8	41	41	QA	-1
OR10J3	0.133829	2	2	6	6	ER	0.000114244
AMER3	0.133838	5	5	17	17	ER	2.82e-10
CLDN20	0.133848	2	2	46	45	QA	-1
ZNF497	0.133864	1	1	1	1	ER	0.133864
FSD1	0.133877	5	5	12	12	ER	2.4e-07
PPP2R1B	0.133882	2	2	9	9	ER	9.99e-06
PALB2	0.134007	5	5	46	46	QA	-1
RUNDC1	0.134172	5	5	57	57	QA	-1
CNN1	0.134287	4	4	40	40	ER.A	-1
SMARCA2	0.134312	8	8	43	43	QA	-1
TROAP	0.134425	9	9	91	89	QA	-1
CCL4	0.134446	1	1	1	1	ER	0.134446
SLC25A48	0.134446	1	1	1	1	ER	0.134446
MYL3	0.134506	1	1	1	1	ER	0.134506
OR10V1	0.134582	2	2	2	2	ER	0.0283186
ATF6B	0.134626	5	5	34	33	ER.A	-1
PPP1R3B	0.134654	1	1	1	1	ER	0.134654
RAB24	0.134654	1	1	1	1	ER	0.134654
RSPH6A	0.134686	7	7	89	89	QA	-1
JAM3	0.134762	2	2	2	1	ER	0.134762
TACR3	0.134845	4	4	60	60	QA	-1
CCDC147	0.134894	9	9	29	29	ER.A	-1
HIST1H2AH	0.134948	1	1	1	1	ER	0.134948
MTBP	0.135154	7	7	182	181	QA	-1
PCDHAC2	0.135187	10	10	75	73	QA	-1
DNAJC13	0.135239	15	15	129	127	QA	-1
SYNJ2	0.135351	11	11	98	97	QA	-1
VWC2	0.135397	1	1	1	1	ER	0.135397
LUC7L	0.13541	2	2	66	66	QA	-1
KRAS	0.13542	1	1	1	1	ER	0.13542
KCNK13	0.135445	3	3	22	22	ER.A	-1
MRPS7	0.135453	1	1	4	4	ER	0.00118281
ACP6	0.135568	1	1	6	6	ER	0.000511022
ADAMTSL1	0.135604	19	19	167	164	QA	-1
ZNF709	0.135857	1	1	1	1	ER	0.135857
FUT11	0.135913	6	6	45	45	QA	-1
FAM83G	0.135921	3	3	22	22	ER.A	-1
HOXD13	0.135923	1	1	1	1	ER	0.135923
PATL1	0.135923	2	1	1	1	ER	0.135923
ARMC12	0.135995	7	7	44	44	QA	-1
MX1	0.135996	7	7	64	63	QA	-1
NEU1	0.13611	2	2	8	8	ER	1.9e-05
GPAT2	0.136198	1	1	24	24	ER.A	-1
MINK1	0.13624	7	7	7	7	ER	7.49e-05
OR2V2	0.136244	3	3	17	17	ER	5.82e-11
ZNF418	0.136265	3	3	11	11	ER	1.24e-07
COQ10A	0.136348	7	6	8	8	ER	2.39e-05
LINGO4	0.136369	4	4	18	18	ER	4.77e-11
PEX7	0.13649	1	1	60	60	QA	-1
NHLH1	0.13663	1	1	1	1	ER	0.13663
HID1	0.136715	6	6	61	60	QA	-1
RASGRF1	0.136837	5	5	92	91	QA	-1
EHBP1	0.136876	12	12	74	74	QA	-1
PGR	0.137042	8	8	85	85	QA	-1
RUSC1	0.137045	5	5	14	14	ER	8.65e-10
TARBP1	0.137152	6	6	57	57	QA	-1
TNPO2	0.137153	4	4	25	25	ER.A	-1
TNFSF14	0.137286	1	1	11	11	ER	5.35e-07
ZNF48	0.137358	5	5	45	45	QA	-1
HNRNPU	0.137375	2	2	23	23	ER.A	-1
GPM6A	0.13743	1	1	18	18	ER	8.39e-12
C18orf8	0.137647	4	4	44	44	QA	-1
RAB21	0.137745	1	1	23	23	ER.A	-1
PPP1R18	0.137786	4	4	21	21	ER.A	-1
ZFR2	0.137856	1	1	1	1	ER	0.137856
SDR9C7	0.137918	4	4	53	53	QA	-1
OMD	0.137972	3	3	53	53	QA	-1
AACS	0.137979	10	10	107	106	QA	-1
RGMB	0.138038	2	2	2	2	ER	0.0336229
FEM1C	0.138083	3	3	3	3	ER	0.00359293
PANK4	0.138089	3	3	22	22	ER.A	-1
FAM159A	0.138111	3	3	50	50	QA	-1
UNC13B	0.138235	13	13	92	91	QA	-1
CAPN3	0.138305	17	17	85	60	QA	-1
RGS19	0.138328	3	3	13	13	ER	8.8e-08
MKNK1	0.138417	8	8	56	56	QA	-1
CMTM1	0.138495	2	2	23	23	ER.A	-1
ZNF511	0.138811	2	2	29	29	ER.A	-1
CSE1L	0.139112	3	3	8	8	ER	0.00013579
PAG1	0.139204	1	1	1	1	ER	0.139204
PTPLB	0.139204	1	1	1	1	ER	0.139204
MMP19	0.139246	5	5	109	109	QA	-1
GPR182	0.139276	3	3	6	6	ER	0.000215424
RAB36	0.139323	5	5	22	22	ER.A	-1
METAP1D	0.139426	5	5	60	60	QA	-1
ATP6V0A2	0.1395	7	7	42	42	QA	-1
FAM76B	0.13953	1	1	7	7	ER	3.8e-05
OR7D2	0.139536	1	1	1	1	ER	0.139536
PRDM14	0.139743	2	2	16	16	ER	1.09e-08
HIST1H2AM	0.139745	2	2	2	2	ER	0.0350944
MTF1	0.139814	3	3	17	17	ER	1.99e-10
THRAP3	0.139853	3	3	11	11	ER	1.98e-07
POLDIP2	0.139987	1	1	1	1	ER	0.139987
EFEMP1	0.140032	3	3	7	7	ER	3.8e-05
IL15	0.140281	1	1	1	1	ER	0.140281
CD86	0.140367	1	1	35	35	ER.A	-1
RECQL	0.140415	4	3	62	62	QA	-1
USP10	0.140466	2	2	2	2	ER	0.0310186
NTPCR	0.140478	1	1	1	1	ER	0.140478
TNFRSF6B	0.140484	6	6	10	10	ER	1.99e-06
TRIP13	0.140526	2	2	52	52	QA	-1
HCAR3	0.140541	2	2	15	15	ER	1.58e-09
DOCK10	0.140693	17	16	60	60	QA	-1
CD180	0.140794	9	9	164	163	QA	-1
KLC1	0.140844	1	1	1	1	ER	0.140844
TRAF3IP1	0.14088	2	2	6	6	ER	0.000951744
BOC	0.140978	9	7	87	87	QA	-1
MTR	0.141236	15	15	55	54	QA	-1
TRIML2	0.141236	1	1	1	1	ER	0.141236
YAE1D1	0.141268	3	3	19	19	ER	9.78e-11
MAP3K8	0.141347	2	2	5	5	ER	0.00102985
MPZL2	0.141421	4	4	41	41	QA	-1
C4orf21	0.141474	14	14	130	122	QA	-1
UBA3	0.141539	1	1	1	1	ER	0.141539
PIK3C3	0.141766	5	5	40	40	ER.A	-1
PDIK1L	0.141776	1	1	1	1	ER	0.141776
MRGPRX1	0.141778	2	2	2	2	ER	0.0441301
ANXA6	0.141823	8	8	51	51	QA	-1
DEFB121	0.141854	1	1	1	1	ER	0.141854
AMOTL1	0.14186	4	4	106	104	QA	-1
TSHZ3	0.141868	7	7	79	78	QA	-1
GLS	0.141942	1	1	1	1	ER	0.141942
PSMA5	0.141942	1	1	1	1	ER	0.141942
SLC9C2	0.142019	5	5	32	31	ER.A	-1
USP28	0.142039	16	16	165	162	QA	-1
CHAC2	0.142366	1	1	6	6	ER	0.000904167
TLK2	0.142412	1	1	1	1	ER	0.142412
ZNF574	0.142456	9	8	22	22	ER.A	-1
HIST1H3H	0.142526	3	3	52	52	QA	-1
SNED1	0.142544	9	9	51	51	QA	-1
UTP23	0.142545	1	1	1	1	ER	0.142545
TNFRSF19	0.142586	2	2	13	13	ER	1.5e-08
ANKRD46	0.142604	2	2	4	4	ER	0.000876532
CHP2	0.142717	4	4	87	87	QA	-1
MTHFD1L	0.142746	6	6	14	14	ER	3.02e-08
GAL3ST2	0.142747	2	2	58	57	QA	-1
DHX9	0.142768	3	3	3	3	ER	0.0205587
SMARCC1	0.142779	6	6	72	72	QA	-1
B4GALT5	0.142827	2	2	11	11	ER	7.14e-07
DRD2	0.142861	3	3	20	20	ER	3.55e-13
OMA1	0.14301	5	5	47	46	QA	-1
FBXO38	0.143079	10	10	73	73	QA	-1
TRIM21	0.143156	8	8	37	37	ER.A	-1
ATP7B	0.143172	19	19	333	327	QA	-1
PTEN	0.143301	3	3	10	9	ER	3.29e-06
NTN1	0.143307	1	1	1	1	ER	0.143307
HERC2	0.14335	17	17	120	119	QA	-1
XKR7	0.143404	2	2	35	35	ER.A	-1
C11orf52	0.14346	2	2	2	2	ER	0.0278289
CA2	0.143514	3	3	3	2	ER	0.0428022
TOR1B	0.143557	4	4	11	11	ER	1.02e-06
IZUMO4	0.14363	6	6	74	74	QA	-1
NFE2	0.143652	3	3	57	55	QA	-1
MADD	0.143765	4	4	5	5	ER	0.00136009
G3BP2	0.143914	2	2	6	6	ER	0.000105813
TRPA1	0.143932	3	3	52	52	QA	-1
MBP	0.143966	2	2	23	23	ER.A	-1
BBS4	0.144091	5	5	57	55	QA	-1
CRYAA	0.1442	1	1	1	1	ER	0.1442
PLEKHM2	0.1442	1	1	1	1	ER	0.1442
TFPI2	0.144223	2	2	13	13	ER	1.97e-08
NAA35	0.144353	5	5	52	52	QA	-1
MAP3K5	0.144544	11	11	99	98	QA	-1
SND1	0.144548	4	4	44	44	QA	-1
C2	0.144588	4	3	5	5	ER	0.000761836
CYP3A43	0.1446	3	3	25	25	ER.A	-1
NME7	0.14461	3	3	29	29	ER.A	-1
SOCS2	0.144614	1	1	1	1	ER	0.144614
HSPA14	0.144682	1	1	1	1	ER	0.144682
MRPL54	0.144682	1	1	1	1	ER	0.144682
TDRD10	0.144789	2	2	58	57	QA	-1
PNMA1	0.144828	3	3	7	7	ER	7.47e-05
PTPN9	0.144871	2	2	3	3	ER	0.0117451
KIRREL	0.144871	7	7	28	28	ER.A	-1
BMPR1B	0.144894	6	6	20	20	ER	2.27e-12
CACNA2D1	0.144925	5	5	7	7	ER	5.97e-05
OR5T3	0.145006	1	1	1	1	ER	0.145006
MRPL35	0.145029	1	1	7	7	ER	4.75e-05
2022-09-03	0.145248	1	1	1	1	ER	0.145248
CRIP2	0.145318	1	1	1	1	ER	0.145318
SNUPN	0.145318	1	1	1	1	ER	0.145318
TMEM163	0.14533	3	3	4	4	ER	0.00100262
KCNQ3	0.145356	5	5	17	17	ER	2.34e-10
TCTE1	0.145373	10	10	57	57	QA	-1
DYNLT1	0.145379	1	1	3	3	ER	0.0173005
KRTAP10-3	0.145416	1	1	1	1	ER	0.145416
PDYN	0.145416	1	1	1	1	ER	0.145416
TMEM110-MUSTN1	0.145416	1	1	1	1	ER	0.145416
KIAA1244	0.145502	13	13	126	124	QA	-1
CAPZA1	0.145513	1	1	44	44	QA	-1
TPK1	0.145525	2	2	2	2	ER	0.0305043
BMP1	0.145537	7	7	33	33	ER.A	-1
PTPN23	0.145605	18	18	102	102	QA	-1
CSPG4	0.145695	8	8	144	144	QA	-1
NR2C1	0.145874	7	7	111	111	QA	-1
RAB39A	0.145905	1	1	1	1	ER	0.145905
GRB14	0.145942	1	1	12	12	ER	5.51e-08
SORCS3	0.145958	10	10	15	15	ER	2.3e-09
TYW5	0.146053	2	2	2	2	ER	0.0332174
CTDNEP1	0.146132	1	1	1	1	ER	0.146132
IL4	0.146323	3	3	11	11	ER	9.03e-08
AGK	0.146389	6	6	16	16	ER	2.01e-09
CERS2	0.146514	2	2	2	2	ER	0.0421654
THSD1	0.146534	4	4	5	5	ER	0.000364041
PMS2	0.146565	2	2	4	4	ER	0.00384759
LLPH	0.1467	1	1	11	11	ER	3.03e-06
YES1	0.146712	3	3	8	8	ER	5.43e-05
ZNF521	0.146741	8	8	44	44	QA	-1
MRPL45	0.14682	1	1	1	1	ER	0.14682
KERA	0.146829	1	1	1	1	ER	0.146829
C8A	0.14698	2	2	6	6	ER	1.87e-05
OR51G2	0.147051	3	3	9	9	ER	1.23e-05
SGK2	0.147123	2	2	5	5	ER	0.000404617
HUS1	0.147123	2	2	7	7	ER	9.65e-05
FUK	0.147184	12	12	102	101	QA	-1
CD209	0.147289	5	5	11	11	ER	6.97e-07
VSTM2A	0.147315	1	1	1	1	ER	0.147315
TDRD3	0.147345	8	8	78	78	QA	-1
NF2	0.147357	1	1	1	1	ER	0.147357
PRL	0.147357	1	1	1	1	ER	0.147357
SLC29A4	0.147357	1	1	1	1	ER	0.147357
PLA2G4A	0.14745	1	1	1	1	ER	0.14745
OR2AG2	0.147514	4	4	40	40	ER.A	-1
ITK	0.147521	1	1	41	41	QA	-1
ACTBL2	0.147546	5	5	96	95	QA	-1
WDPCP	0.147557	3	3	47	47	QA	-1
SRMS	0.147651	3	3	60	60	QA	-1
DDI1	0.147696	2	2	3	3	ER	0.013221
KLHL10	0.147721	5	5	22	22	ER.A	-1
TBC1D17	0.148077	7	7	104	103	QA	-1
CLEC4A	0.148135	4	4	27	27	ER.A	-1
NXPE2	0.148241	2	2	3	3	ER	0.0142991
AQPEP	0.148258	11	11	58	58	QA	-1
ZNF467	0.148329	2	2	2	2	ER	0.0326605
VPS16	0.148344	8	8	74	74	QA	-1
CLEC2B	0.148346	1	1	7	7	ER	5.76e-05
FLNB	0.148392	24	24	150	146	QA	-1
SUPT20H	0.148392	3	3	36	36	ER.A	-1
FAM73B	0.148404	4	4	5	5	ER	0.000732902
NAP1L4	0.148423	2	1	4	4	ER	0.00168954
PLA2G2A	0.148478	1	1	13	13	ER	3.08e-09
GRM1	0.148486	5	4	6	6	ER	0.000372044
SLC44A5	0.148497	7	7	68	68	QA	-1
PPM1G	0.148553	1	1	1	1	ER	0.148553
SETMAR	0.148614	1	1	1	1	ER	0.148614
CHST9	0.1487	1	1	1	1	ER	0.1487
FANCD2	0.148938	12	12	32	32	ER.A	-1
SLC6A6	0.14894	2	2	2	2	ER	0.0317224
SUV420H1	0.148945	4	4	5	5	ER	0.00235141
CA10	0.149125	2	2	32	32	ER.A	-1
ACTC1	0.149147	1	1	1	1	ER	0.149147
SYT5	0.14918	5	5	16	16	ER	8.58e-11
EMC1	0.149453	10	10	37	37	ER.A	-1
KALRN	0.149574	30	29	168	165	QA	-1
EMILIN2	0.149615	11	11	120	119	QA	-1
DNPEP	0.149683	5	5	22	22	ER.A	-1
PHACTR1	0.149863	1	1	1	1	ER	0.149863
FOSL2	0.149885	2	2	2	2	ER	0.0435118
CADM1	0.149915	2	2	4	4	ER	0.00412041
ALDH16A1	0.149926	7	7	79	77	QA	-1
TOMM20L	0.149946	3	3	26	26	ER.A	-1
PROL1	0.149953	1	1	24	23	ER.A	-1
C5orf30	0.149978	1	1	6	6	ER	0.00198077
CLK2	0.150048	4	4	42	42	QA	-1
USP47	0.150102	11	11	62	62	QA	-1
CNOT10	0.150204	8	8	59	59	QA	-1
DPP6	0.150207	4	4	89	88	QA	-1
PIK3R1	0.150214	1	1	1	1	ER	0.150214
SOX10	0.150468	1	1	1	1	ER	0.150468
CRYBA4	0.150498	1	1	4	4	ER	0.00172482
NR1D1	0.150527	2	2	12	12	ER	1.14e-07
EIF1AD	0.150647	4	4	47	47	QA	-1
RICTOR	0.150819	7	7	34	34	ER.A	-1
MPEG1	0.15097	6	6	56	56	QA	-1
GRK6	0.150981	2	2	6	6	ER	0.000312604
ZCCHC7	0.151063	2	2	43	43	QA	-1
CD68	0.151083	3	3	6	6	ER	0.000230096
ZC3H13	0.15111	13	12	112	112	QA	-1
CSRP2BP	0.151125	9	9	39	39	ER.A	-1
EFTUD2	0.151183	6	6	33	33	ER.A	-1
CEBPZ	0.151227	4	4	58	56	QA	-1
ZNF786	0.151287	6	6	41	41	QA	-1
[truncated: 10,845 more rows]

## Sheet: Supplementary Table 3
Supplementary Table 3. UC-associated genes from SKAT-O analysis on AJ UC cohort using high impact rare variants
SetID	P.value	N.Marker.All	N.Marker.Test	MAC	m	Method.bin	MAP
ARHGAP32	2.59634e-05	10	10	61	61	QA	-1
DPH2	9.13953e-05	3	3	28	28	QA	-1
ITK	0.000144461	4	4	40	40	ER.A	-1
SLFN11	0.000194728	5	5	23	23	ER.A	-1
SUSD5	0.000221223	6	6	55	55	QA	-1
ZFAND4	0.000222552	9	9	42	42	QA	-1
CRAT	0.000274691	5	5	52	52	QA	-1
NANOS2	0.000364677	5	5	5	5	ER	7.47599e-06
PTK6	0.000570191	7	7	14	14	ER	4.50113e-13
PTCHD4	0.00070078	2	2	3	3	ER	0.00070078
RLF	0.000733188	6	6	43	43	QA	-1
TEAD3	0.000916241	2	2	10	10	ER	1.16316e-08
AP4M1	0.00102262	4	4	45	45	QA	-1
APCDD1	0.00112221	7	7	45	35	QA	-1
GJD2	0.0012359	3	3	3	3	ER	0.00015713
PPAP2C	0.00133917	5	5	36	36	ER.A	-1
STAC3	0.00139612	2	2	12	12	ER	5.36596e-13
LBR	0.00142048	4	4	16	16	ER	1.34928e-15
AJAP1	0.0014552	3	3	13	13	ER	5.56325e-11
TRPV4	0.00155171	8	8	23	23	ER.A	-1
CLEC4E	0.00157455	3	3	23	23	ER.A	-1
RPTN	0.00169912	3	3	4	4	ER	0.00169912
ASTN2	0.00174901	6	6	56	56	QA	-1
INPP5D	0.00183271	4	4	24	24	ER.A	-1
SPP2	0.00184663	3	3	5	5	ER	9.61661e-07
OR2H1	0.00196961	3	3	32	32	ER.A	-1
MYNN	0.00234994	2	2	4	4	ER	0.000322015
ARHGEF17	0.00235676	17	17	188	174	QA	-1
GGNBP2	0.00241129	3	2	9	9	ER	1.20545e-09
TST	0.00241363	4	4	36	36	QA	-1
EXT2	0.00256907	12	12	50	50	QA	-1
PDE4C	0.00257044	4	4	14	14	ER	1.55349e-14
C2orf70	0.0027368	2	2	2	2	ER	0.0027368
POLE2	0.00283053	2	2	2	2	ER	0.00283053
PMPCB	0.00287188	4	4	28	28	ER.A	-1
FRS3	0.0029082	2	2	10	10	ER	2.14691e-10
PABPC1L	0.00299212	4	4	82	82	QA	-1
NECAP1	0.00307141	3	3	3	3	ER	0.00032852
SERPINA3	0.00318786	4	4	45	45	QA	-1
UGP2	0.00320374	3	2	2	2	ER	0.00320374
GALNT8	0.00337933	7	7	39	38	ER.A	-1
RNF39	0.00346813	1	1	2	2	ER	0.00346813
OR6C6	0.00375038	4	4	66	66	QA	-1
VIPR1	0.00380388	4	4	32	32	ER.A	-1
KLRB1	0.00397637	1	1	12	12	ER	4.44475e-11
EYA2	0.00406057	5	5	25	25	ER.A	-1
OGFOD1	0.00435094	3	3	8	8	ER	1.98275e-08
TMX1	0.00438442	1	1	2	2	ER	0.00438442
TMIGD1	0.00438468	3	3	41	41	QA	-1
RAB19	0.00446327	2	2	17	17	ER	5.41941e-16
FOXM1	0.00459937	3	3	28	28	ER.A	-1
CHRNA5	0.0047075	4	4	34	34	ER.A	-1
NEK3	0.00471512	2	2	13	13	ER	7.17519e-12
CKM	0.00472161	4	4	36	36	ER.A	-1
TLR9	0.00476519	3	3	32	32	ER.A	-1
NR2C1	0.00493859	7	7	102	102	QA	-1
FOXA1	0.00514053	3	3	5	5	ER	1.98264e-05
FBXL14	0.00527631	3	3	7	7	ER	8.79072e-07
RGL2	0.00527826	7	7	45	45	QA	-1
VDR	0.00550528	3	3	34	34	ER.A	-1
VIPAS39	0.00553847	3	2	8	8	ER	3.87398e-08
IFT27	0.00561843	2	2	2	2	ER	0.00561843
HELLS	0.00573574	3	3	15	15	ER	1.57925e-14
SLC22A3	0.00585004	3	3	27	27	ER.A	-1
LGALS12	0.00586053	2	2	2	2	ER	0.00586053
WDR88	0.00596635	4	4	11	11	ER	1.02273e-10
GPD2	0.00604841	3	3	6	6	ER	1.25711e-06
FAM221B	0.00615734	4	4	30	30	ER.A	-1
COBLL1	0.00622215	3	3	6	6	ER	7.05568e-06
LRRIQ1	0.00626022	16	16	92	92	QA	-1
DDX42	0.0063495	5	5	6	6	ER	8.3965e-06
TTLL2	0.00640079	4	4	28	28	ER.A	-1
XRCC3	0.00659329	1	1	2	2	ER	0.00659329
C9orf50	0.00660296	4	4	28	28	ER.A	-1
FMNL1	0.00662976	3	3	6	6	ER	8.74989e-06
APOA1BP	0.00669838	2	2	63	63	QA	-1
ECSIT	0.00693852	5	5	9	9	ER	2.57236e-10
RPUSD1	0.00699318	3	3	3	3	ER	0.00135455
CLEC4M	0.00700095	4	4	11	11	ER	5.17754e-11
NDUFV3	0.00705563	1	1	2	2	ER	0.00705563
HRC	0.00706462	2	2	20	20	ER	4.11982e-19
PIWIL1	0.00707804	5	5	7	7	ER	1.55062e-08
ANKDD1A	0.00714416	5	5	55	54	QA	-1
ADORA3	0.00718946	2	2	2	2	ER	0.00718946
SHOX2	0.00723706	2	2	2	2	ER	0.00723706
B4GALT1	0.00724713	3	3	14	14	ER	4.18975e-13
CTR9	0.00745865	5	5	63	63	QA	-1
C7orf49	0.00754104	1	1	24	24	ER.A	-1
ZER1	0.00760449	8	8	48	48	QA	-1
KIF27	0.00760604	5	4	28	28	ER.A	-1
ZNF695	0.00771656	5	5	36	36	ER.A	-1
COQ2	0.00778241	1	1	9	9	ER	7.4668e-08
VNN2	0.0077846	1	1	10	10	ER	4.04421e-11
OOSP2	0.00782562	1	1	30	30	ER.A	-1
ATP6V0D2	0.00793871	7	7	44	44	QA	-1
APOA5	0.00805408	4	4	65	65	QA	-1
RPAP1	0.00818647	5	5	36	36	ER.A	-1
LYPD4	0.00822582	1	1	2	2	ER	0.00822582
GP9	0.00825017	3	3	23	23	ER.A	-1
DNAJC13	0.00830568	12	12	104	102	QA	-1
CACNB1	0.0083132	3	3	3	3	ER	0.00185587
MCF2L2	0.00835353	7	7	69	69	QA	-1
NFATC2	0.00836187	6	6	51	51	QA	-1
WDTC1	0.0084094	2	2	53	53	QA	-1
SKIV2L2	0.00842174	2	2	10	10	ER	6.77332e-09
SLC13A3	0.00852227	8	8	84	84	QA	-1
PEAR1	0.00856831	5	5	8	8	ER	5.08761e-07
LETM2	0.00868095	4	4	32	32	ER.A	-1
PGBD4	0.00887079	2	2	6	6	ER	1.43155e-06
LIFR	0.00896457	5	5	5	5	ER	2.60832e-05
CLASRP	0.00907858	2	2	2	2	ER	0.00907858
WDHD1	0.00911385	6	6	16	16	ER	4.29194e-16
CYGB	0.00936796	1	1	14	14	ER	8.36952e-13
CYP4F3	0.00938706	5	5	22	14	ER.A	-1
HIST1H4A	0.00952019	1	1	39	39	ER.A	-1
TMEM82	0.00965706	4	4	49	49	QA	-1
PIGT	0.00973746	4	4	42	42	QA	-1
ADAT1	0.00983437	4	4	13	13	ER	5.12992e-13
CCDC102A	0.00989533	2	2	5	5	ER	1.15972e-05
ZFPM1	0.00990204	5	5	13	13	ER	4.10731e-11
FAM169A	0.0100863	6	6	33	33	ER.A	-1
TAS2R14	0.0101006	3	3	3	3	ER	0.00233151
MMP11	0.0101645	4	4	5	5	ER	3.6803e-05
HEYL	0.0101733	3	3	7	7	ER	6.89845e-08
RAB32	0.0102084	1	1	21	21	ER.A	-1
MTHFD1	0.0102896	7	7	13	13	ER	2.88187e-13
TYW1	0.0103631	2	2	16	16	ER	6.68376e-15
C2orf16	0.0105036	12	12	106	102	QA	-1
ANKS4B	0.0105779	2	2	30	30	ER.A	-1
THAP7	0.0105807	3	3	16	16	ER	6.08328e-14
KCNIP3	0.010608	2	2	2	2	ER	0.010608
PRPF18	0.0106427	3	3	109	107	QA	-1
SPRYD4	0.0107428	3	3	16	16	ER	8.13696e-15
NLGN1	0.0109215	3	3	3	3	ER	0.00227377
QRFPR	0.0110936	5	5	69	69	QA	-1
LIMD1	0.0112951	6	6	30	30	ER.A	-1
HTRA4	0.0113067	4	4	35	34	ER.A	-1
CCDC97	0.0116482	2	2	8	8	ER	3.46162e-09
LOXL2	0.0117455	8	8	25	25	ER.A	-1
SIGLEC5	0.0118303	2	2	7	6	ER	1.57083e-06
LY6G6D	0.0119926	1	1	6	6	ER	4.99765e-07
SEC14L5	0.0121911	4	4	65	65	QA	-1
VCPIP1	0.0122559	2	2	2	2	ER	0.0122559
CCDC17	0.0123202	4	4	44	44	QA	-1
NOTCH2	0.0123344	7	7	52	52	QA	-1
DVL1	0.0125477	1	1	11	11	ER	2.85437e-12
ATG4D	0.0126176	2	2	8	8	ER	5.49572e-08
C17orf74	0.0126276	3	3	13	13	ER	1.5925e-12
POU4F2	0.0126567	2	2	3	3	ER	0.000168368
OTUD6B	0.0127863	1	1	5	5	ER	2.61921e-05
PPP2R1B	0.0128891	3	3	7	7	ER	6.06778e-08
KIF26B	0.0131121	11	11	79	78	QA	-1
OR6K3	0.0133595	2	2	12	12	ER	3.92398e-10
C11orf54	0.0134035	2	2	6	6	ER	2.42646e-06
NMS	0.0135485	2	2	56	55	QA	-1
HRASLS5	0.0135806	4	4	6	6	ER	5.07925e-08
PRKAA2	0.0136274	3	3	3	3	ER	0.00059497
ZNF280D	0.0136346	3	3	7	7	ER	2.20144e-06
SV2C	0.0137046	11	11	95	95	QA	-1
CD4	0.0137294	1	1	9	9	ER	7.29731e-08
UACA	0.013738	7	7	33	32	ER.A	-1
STK24	0.0138549	1	1	55	55	QA	-1
THUMPD2	0.0140422	1	1	20	20	ER	9.56985e-19
CACNA2D3	0.0141493	6	6	57	57	QA	-1
WDR60	0.0143884	7	7	147	147	QA	-1
MEDAG	0.0144987	1	1	6	6	ER	1.35309e-06
CLK3	0.0145753	3	3	3	3	ER	0.000856318
SIDT1	0.014598	7	7	121	119	QA	-1
STAG3	0.0146992	3	3	19	19	ER	9.65399e-17
TRIM17	0.0147923	5	5	10	10	ER	6.83874e-11
GHRL	0.0148001	4	4	24	24	ER.A	-1
KTI12	0.0148631	3	3	14	14	ER	4.38314e-13
ZNF181	0.0149987	4	4	12	12	ER	2.52744e-12
EML5	0.0150102	6	6	16	16	ER	5.15759e-15
CAPZA1	0.0151295	1	1	36	36	ER.A	-1
FGF22	0.0151423	2	2	13	13	ER	4.70397e-13
KCNV1	0.0153804	2	2	2	2	ER	0.0153804
PPP1R21	0.015582	8	8	88	87	QA	-1
GABPB2	0.015604	3	3	26	26	ER.A	-1
TMEM61	0.0156067	3	3	16	13	ER	1.54915e-13
POLRMT	0.0157843	3	3	4	4	ER	2.3835e-05
SLC38A4	0.0165042	5	5	47	47	QA	-1
TF	0.01658	9	9	127	124	QA	-1
NUTM1	0.0167226	8	7	109	108	QA	-1
LYVE1	0.0167665	2	2	6	6	ER	2.02239e-07
KLHL28	0.0168504	1	1	11	11	ER	1.39362e-11
FCRL6	0.0169509	5	5	23	23	ER.A	-1
PMS1	0.017056	2	2	53	53	QA	-1
PCDP1	0.0170781	4	4	52	52	QA	-1
SUSD1	0.0171314	13	11	36	36	ER.A	-1
POLR1E	0.0172422	6	6	109	109	QA	-1
POU1F1	0.0173926	1	1	20	20	ER	5.2753e-20
KIF18B	0.0174743	8	8	21	21	ER.A	-1
SPNS2	0.0175854	6	6	12	12	ER	2.5383e-13
MTBP	0.0178278	7	7	149	147	QA	-1
RALGPS1	0.0178542	3	3	10	10	ER	1.69902e-09
SRRM3	0.0179037	1	1	3	3	ER	0.000520272
CCBE1	0.0179685	3	3	4	4	ER	0.00400552
ZNF790	0.0181107	4	4	18	18	ER	1.06637e-17
KANSL1L	0.0181256	13	13	77	77	QA	-1
DOC2A	0.0182016	9	9	69	68	QA	-1
SLC46A1	0.0182694	2	2	14	14	ER	7.45157e-13
C7orf63	0.0183622	4	4	33	33	ER.A	-1
MAPK4	0.0184032	8	8	63	60	QA	-1
STX8	0.0184543	2	2	9	9	ER	1.63e-10
PRF1	0.0184607	6	6	47	47	QA	-1
TM7SF3	0.0184903	5	5	18	18	ER	6.06237e-17
OPN3	0.0185849	6	6	93	92	QA	-1
SGK2	0.0185897	2	2	8	8	ER	7.00078e-08
ANK2	0.0185983	27	27	85	79	QA	-1
SSH1	0.0187903	4	4	6	6	ER	7.52772e-06
ZNF124	0.018907	2	2	4	4	ER	7.35377e-05
PLAT	0.0191674	5	5	11	11	ER	2.93593e-10
FUT7	0.019563	2	2	23	23	ER.A	-1
ZNF18	0.0197286	1	1	43	43	QA	-1
GSE1	0.0202056	17	17	85	85	QA	-1
EIF2AK4	0.0203362	9	9	72	72	QA	-1
ADNP2	0.0203621	9	9	99	98	QA	-1
GOT2	0.0203814	2	2	3	3	ER	0.00230117
RNF38	0.020405	3	3	3	3	ER	0.00119686
TMEM200A	0.0204627	2	2	12	12	ER	1.03018e-12
FAM188A	0.0205232	3	3	26	25	ER.A	-1
GBP6	0.0207414	5	5	85	84	QA	-1
C14orf166B	0.0208146	6	6	62	61	QA	-1
CDA	0.0211681	2	1	3	3	ER	0.000858579
MPG	0.0212995	3	3	3	3	ER	0.0012355
SORCS1	0.021383	7	7	7	7	ER	7.19619e-07
GRN	0.0215106	9	9	42	42	QA	-1
PHLDB3	0.0215226	6	6	13	13	ER	1.30381e-12
PLSCR2	0.0215632	4	4	37	37	ER.A	-1
CDC37L1	0.0216278	3	3	38	37	ER.A	-1
ZNF786	0.0216985	6	6	35	35	ER.A	-1
CLIP3	0.0217637	1	1	2	2	ER	0.0217637
PAPSS2	0.0218146	7	7	32	32	ER.A	-1
ZNF726	0.0219259	1	1	10	10	ER	1.19458e-08
AEN	0.0221017	4	4	56	56	QA	-1
PPP1R3D	0.0221247	1	1	6	6	ER	2.1879e-06
DYNC1I2	0.022179	1	1	6	6	ER	3.42425e-06
CA1	0.0222319	2	2	7	7	ER	4.43504e-08
MRM1	0.0225436	1	1	6	6	ER	2.2962e-06
DOCK1	0.0226935	13	13	51	49	QA	-1
ARHGEF18	0.0227619	8	8	31	31	ER.A	-1
ENKD1	0.022873	3	3	26	26	ER.A	-1
NUDT3	0.0228939	2	2	25	25	ER.A	-1
FBXO31	0.0229089	2	2	32	32	ER.A	-1
ANP32B	0.022915	3	3	4	4	ER	8.04057e-05
ZKSCAN2	0.0230255	8	8	30	26	ER.A	-1
FBXO15	0.0231426	3	3	13	13	ER	2.67108e-13
IFNA21	0.0232266	1	1	11	11	ER	2.62772e-11
PVRL3	0.0234836	5	5	21	21	ER.A	-1
OTUD7B	0.0234971	5	5	42	42	QA	-1
DEFB129	0.0235213	1	1	3	3	ER	0.0010449
MAN2B1	0.023669	8	8	27	27	ER.A	-1
PAF1	0.0237072	7	7	47	47	QA	-1
NELFB	0.0238039	4	4	15	15	ER	2.59238e-15
EAPP	0.0238297	2	2	42	41	QA	-1
TFAP2B	0.023999	2	2	14	14	ER	4.60692e-13
CYP27C1	0.0240517	4	4	23	23	ER.A	-1
SLC22A9	0.0240672	7	7	15	15	ER	4.69827e-15
ISL1	0.0241505	2	2	30	30	ER.A	-1
TCTN1	0.0241795	2	2	2	2	ER	0.0241795
FAAH	0.0242062	5	5	72	45	QA	-1
FAM8A1	0.0243106	1	1	3	3	ER	0.000452667
MAPK15	0.0245698	4	4	43	42	QA	-1
CATSPER4	0.0247829	4	4	24	24	ER.A	-1
PAX6	0.0248503	3	3	3	3	ER	0.00142949
OLFML2B	0.0248771	7	5	19	19	ER	1.09629e-17
RABGAP1L	0.0249153	7	7	13	13	ER	2.55961e-12
USP15	0.0249404	3	3	20	20	ER	5.76785e-19
SLC4A1	0.0250968	9	9	75	75	QA	-1
ARIH2OS	0.0252057	2	2	2	2	ER	0.0252057
ZKSCAN1	0.0252755	3	3	18	18	ER	3.39484e-19
KANSL3	0.0253157	2	2	8	8	ER	5.73018e-08
GK2	0.0253215	7	7	34	34	ER.A	-1
CPZ	0.0253785	18	18	124	122	QA	-1
VCAM1	0.0255019	3	3	6	6	ER	3.50828e-06
TOB1	0.0255229	3	3	22	22	ER.A	-1
CHKB	0.0256699	4	4	8	8	ER	2.45471e-08
AGPAT6	0.0257586	2	2	9	9	ER	7.8935e-09
CCT4	0.0258796	2	2	35	35	ER.A	-1
BMP6	0.025884	6	6	11	11	ER	2.20472e-09
BBX	0.0259735	6	6	60	60	QA	-1
NUGGC	0.0260555	3	3	7	7	ER	1.08349e-07
TRPM1	0.0260832	18	18	88	86	QA	-1
PARD6B	0.0261278	3	3	40	40	ER.A	-1
LAMP3	0.0261908	2	2	4	4	ER	2.26734e-05
CCDC71	0.0263254	6	6	33	33	ER.A	-1
ARMC2	0.0265112	7	7	35	30	ER.A	-1
ZSCAN2	0.026765	5	5	44	44	QA	-1
P2RY14	0.0267791	2	2	8	8	ER	2.67964e-08
IL33	0.0269372	1	1	6	6	ER	5.7405e-06
LFNG	0.0270397	4	4	26	26	ER.A	-1
SYPL2	0.0271365	2	2	10	10	ER	2.55526e-09
DHRS7B	0.0272215	4	4	67	67	QA	-1
LIPE	0.0273122	3	3	7	7	ER	3.461e-07
AQP11	0.0273299	2	2	2	2	ER	0.00251222
SPPL2A	0.0274782	1	1	1	1	ER	0.0274782
RFWD3	0.0275138	4	4	78	76	QA	-1
ENPP6	0.0275361	7	7	50	49	QA	-1
GABRA1	0.0275713	1	1	1	1	ER	0.0275713
NCL	0.027593	4	4	14	14	ER	1.53211e-12
KBTBD8	0.0276122	4	4	17	17	ER	1.30703e-17
DCLRE1A	0.0276399	4	4	7	7	ER	1.58152e-07
ST6GALNAC1	0.0276451	4	4	41	41	QA	-1
C7orf43	0.0276684	2	2	16	16	ER	2.09454e-14
TTC39C	0.0278578	7	7	32	32	ER.A	-1
HSP90AA1	0.0279177	1	1	1	1	ER	0.0279177
RRS1	0.027959	3	3	13	13	ER	5.08234e-12
GPR116	0.0280144	9	9	54	54	QA	-1
STAT4	0.0280175	5	5	50	50	QA	-1
TOP1	0.0280371	3	3	19	19	ER	8.04124e-18
TADA2A	0.0280454	4	4	4	4	ER	7.07579e-05
ATF2	0.0280647	2	2	2	2	ER	0.00307394
TTBK2	0.0281674	1	1	1	1	ER	0.0281674
CABIN1	0.0281744	18	18	171	170	QA	-1
GLP1R	0.0281989	3	2	3	3	ER	0.00543481
C10orf107	0.0282269	1	1	1	1	ER	0.0282269
DNTTIP2	0.0282269	1	1	1	1	ER	0.0282269
RMND5B	0.0284578	3	3	29	29	ER.A	-1
IYD	0.0286074	1	1	1	1	ER	0.0286074
TBCE	0.0286167	3	3	7	7	ER	2.1664e-07
NR1D1	0.0287052	2	2	10	10	ER	1.07801e-09
RSU1	0.0287728	4	4	46	46	QA	-1
TCTE3	0.0291648	4	4	4	4	ER	3.85266e-05
SECTM1	0.0291937	2	2	23	23	ER.A	-1
CCDC80	0.0294046	6	6	27	27	ER.A	-1
NTM	0.0295505	4	4	21	21	ER.A	-1
OXSR1	0.0296	1	1	6	6	ER	1.43364e-06
R3HDM2	0.0297773	2	2	21	21	ER.A	-1
ATP6V0A4	0.0297954	12	12	116	114	QA	-1
POPDC3	0.030087	4	4	7	7	ER	2.49776e-07
COBL	0.0301373	3	3	20	20	ER	9.20861e-18
BTBD9	0.0301709	5	5	42	42	QA	-1
HNRNPUL2	0.0304273	2	2	55	55	QA	-1
KLHL38	0.0304625	5	5	26	26	ER.A	-1
DARS2	0.0305737	1	1	14	14	ER	3.77838e-15
WWC2	0.0306611	12	11	53	53	QA	-1
KRTAP10-4	0.0308269	1	1	3	3	ER	0.00148248
RNF180	0.0308666	4	4	15	15	ER	4.12882e-15
RBL2	0.0309042	4	4	36	36	ER.A	-1
FNDC3B	0.0309082	11	11	87	86	QA	-1
TOP2B	0.0310348	3	3	6	6	ER	2.67519e-07
KIF21A	0.0311584	5	5	39	39	ER.A	-1
TIA1	0.0312425	1	1	5	5	ER	0.000106201
GSS	0.0313045	5	5	55	55	QA	-1
FAM136A	0.0313699	1	1	32	32	ER.A	-1
ROR2	0.0315209	10	10	81	80	QA	-1
DCAF4L1	0.0315576	2	2	63	63	QA	-1
MUSK	0.031574	3	3	3	3	ER	0.000181452
OR6C76	0.0315873	2	1	1	1	ER	0.0315873
NUDC	0.0316655	2	2	54	54	QA	-1
GJA10	0.0317004	5	5	30	30	ER.A	-1
TNFRSF10B	0.0317212	2	2	2	2	ER	0.00673044
MIER1	0.0318423	3	3	11	11	ER	3.20999e-11
TRIM44	0.0318449	2	2	9	9	ER	4.05165e-08
GPR146	0.03187	2	2	36	36	ER.A	-1
APP	0.0319151	3	3	8	8	ER	3.82215e-09
CKAP5	0.0320267	3	3	48	48	QA	-1
LTF	0.032293	3	3	9	5	ER	4.52401e-06
CNTN2	0.0324953	12	12	125	115	QA	-1
SLC28A3	0.0325693	4	4	6	6	ER	4.22773e-06
CETN3	0.0327098	5	5	57	57	QA	-1
BAIAP2	0.0327112	1	1	1	1	ER	0.0327112
ATP2A1	0.0329337	8	8	27	27	ER.A	-1
C9	0.0329531	2	2	16	16	ER	6.39927e-17
CCDC9	0.0330491	5	5	5	4	ER	3.14945e-05
ATP12A	0.0330619	10	10	55	55	QA	-1
UBAP1	0.033169	2	2	7	7	ER	5.11154e-08
VLDLR	0.0333692	11	11	67	52	QA	-1
IMMT	0.0334626	7	7	86	86	QA	-1
ZNF169	0.0335629	4	4	38	37	ER.A	-1
LRRC56	0.0335787	5	5	70	70	QA	-1
ERC2	0.0335808	8	8	14	14	ER	3.5344e-13
HLA-G	0.033645	1	1	12	12	ER	2.60629e-12
DHX57	0.0338766	17	17	168	166	QA	-1
MAGI3	0.0338953	7	7	37	37	ER.A	-1
DNM3	0.0339349	4	4	13	13	ER	1.32131e-13
GATAD2A	0.033948	10	10	123	122	QA	-1
HOXB1	0.0339776	1	1	1	1	ER	0.0339776
WDR41	0.0339936	1	1	7	7	ER	4.50395e-07
DNTT	0.0340007	7	7	29	29	ER.A	-1
MFSD9	0.0340653	2	2	23	23	ER.A	-1
MTIF2	0.0341449	6	6	21	21	ER.A	-1
HPS4	0.0341622	4	4	14	14	ER	1.85143e-15
NEURL4	0.0342503	11	11	59	58	QA	-1
RAB11FIP2	0.034345	4	4	14	14	ER	8.98708e-13
UGCG	0.0343774	1	1	6	6	ER	7.66799e-06
PAX9	0.0344397	2	2	2	2	ER	0.00234942
DAK	0.0347023	7	7	21	21	ER.A	-1
ALG6	0.0347508	4	4	7	7	ER	8.81445e-07
SEC22C	0.0348336	3	3	9	9	ER	3.2102e-10
INVS	0.0349019	12	12	80	79	QA	-1
AQPEP	0.0349499	7	7	47	46	QA	-1
MS4A6A	0.0350335	1	1	61	61	QA	-1
OR1M1	0.0351071	3	3	58	57	QA	-1
PLXDC1	0.0352214	3	3	18	18	ER	1.46403e-18
PRPS1L1	0.0352312	3	3	55	54	QA	-1
COX5A	0.0353713	1	1	9	9	ER	4.58833e-08
GRIK5	0.0354075	4	3	37	37	ER.A	-1
MRPL19	0.0354099	3	3	13	13	ER	2.95791e-13
REXO4	0.035453	5	5	138	138	QA	-1
LGSN	0.0354761	3	3	7	7	ER	1.3423e-07
ZNF556	0.0355079	2	2	4	4	ER	0.000260334
RNASEH2A	0.0355269	2	2	3	3	ER	0.000122253
HIST1H3H	0.035579	3	3	43	43	QA	-1
ISM2	0.0356582	3	3	17	17	ER	3.3165e-16
METTL20	0.0357065	4	4	37	37	ER.A	-1
NBR1	0.0357287	4	4	36	36	ER.A	-1
SPTLC1	0.0357863	1	1	1	1	ER	0.0357863
SOAT2	0.0359276	5	5	19	19	ER	4.88964e-18
RSPO4	0.0359527	2	2	2	2	ER	0.00386308
LAYN	0.0359778	1	1	5	5	ER	0.000109498
DOCK5	0.0360206	15	15	99	99	QA	-1
DLEC1	0.0360829	18	17	179	138	QA	-1
C16orf62	0.036184	9	9	25	24	ER.A	-1
PPM1G	0.0362656	1	1	1	1	ER	0.0362656
NCEH1	0.0365532	3	3	9	9	ER	2.42116e-09
STK38L	0.0365762	2	2	2	2	ER	0.00381004
ANKRD55	0.0365863	5	5	42	42	QA	-1
C12orf54	0.0366005	4	4	26	26	ER.A	-1
NOP56	0.036655	3	3	3	3	ER	0.00104638
VRK1	0.0366755	3	3	10	10	ER	7.95501e-12
ZNF862	0.0367986	7	7	43	41	QA	-1
TRAPPC4	0.0368877	1	1	1	1	ER	0.0368877
AASS	0.0368929	1	1	3	3	ER	0.00181211
PLCD4	0.0368984	8	8	48	48	QA	-1
CLDN1	0.0369604	2	2	11	11	ER	3.67351e-10
FAM167A	0.0370635	1	1	1	1	ER	0.0370635
COL20A1	0.0371344	2	2	49	49	QA	-1
FILIP1L	0.0372508	8	8	63	47	QA	-1
MRPS15	0.0372648	1	1	31	31	ER.A	-1
TEKT3	0.0373	3	3	42	42	QA	-1
CELA2B	0.0373845	2	2	10	10	ER	6.24873e-09
KRTAP19-8	0.0374898	1	1	7	7	ER	5.41937e-07
CLPX	0.0375268	4	4	18	17	ER	1.24002e-17
STX10	0.0377507	3	3	16	16	ER	1.09217e-15
CASQ1	0.0377686	5	5	104	104	QA	-1
IQGAP2	0.0378208	15	15	98	97	QA	-1
AK5	0.0379436	1	1	19	19	ER	1.94821e-17
C6orf106	0.0379457	2	2	5	5	ER	1.1265e-05
DCSTAMP	0.0379723	4	4	13	13	ER	2.70832e-11
PPEF2	0.0380679	3	3	16	16	ER	6.60178e-16
OR4Q3	0.0381439	2	2	15	15	ER	1.22946e-13
DACH1	0.0381495	2	2	34	34	ER.A	-1
SEC62	0.0381812	1	1	9	9	ER	7.09085e-10
G6PC	0.0383379	2	2	40	40	ER.A	-1
PLD5	0.0385948	3	3	29	29	ER.A	-1
DCST1	0.0386797	6	6	28	28	ER.A	-1
CMTM4	0.0387946	2	2	11	11	ER	7.72418e-11
WBSCR27	0.0388041	2	2	3	3	ER	0.000825177
MTHFD2	0.0388696	1	1	1	1	ER	0.0388696
OXR1	0.038874	2	2	3	3	ER	0.00171713
DDX25	0.0388986	1	1	1	1	ER	0.0388986
KIAA1524	0.0389564	5	5	67	65	QA	-1
ZNF582	0.0390575	2	2	4	4	ER	0.000334936
CLRN3	0.0392379	2	2	4	4	ER	3.58918e-05
LCT	0.0392484	4	4	14	14	ER	1.33518e-14
ZNF684	0.0393083	1	1	1	1	ER	0.0393083
SIAE	0.0393329	6	6	74	74	QA	-1
GSTO1	0.0393735	2	2	4	4	ER	0.00019343
NABP1	0.0394754	1	1	1	1	ER	0.0394754
TPMT	0.0395478	1	1	12	12	ER	6.97059e-12
CDX2	0.0399299	1	1	1	1	ER	0.0399299
CHRM3	0.0399299	1	1	1	1	ER	0.0399299
SPTBN1	0.0399615	17	17	95	94	QA	-1
C12orf42	0.0400893	2	2	28	28	ER.A	-1
ARFGAP1	0.0401681	2	2	41	41	QA	-1
LSM10	0.0402171	1	1	3	3	ER	0.00138331
ZNF569	0.0402229	3	3	14	14	ER	3.04098e-15
TAS2R60	0.0402394	2	2	15	15	ER	1.22446e-13
RGS22	0.040384	13	13	105	103	QA	-1
TLE6	0.0405339	6	6	24	23	ER.A	-1
SQRDL	0.0405909	5	5	47	47	QA	-1
ZNF239	0.0406	5	5	31	31	ER.A	-1
OR51M1	0.0406488	7	6	40	40	ER.A	-1
HIST1H4B	0.040688	3	3	3	3	ER	0.00274807
MYSM1	0.0407354	3	3	10	10	ER	4.29275e-09
ZFP64	0.0408029	1	1	1	1	ER	0.0408029
CDH4	0.0408996	10	10	100	99	QA	-1
FAM174A	0.0409025	2	2	12	12	ER	3.70909e-12
PTPRC	0.0409208	4	4	8	8	ER	9.91715e-09
PRDX3	0.0409389	2	2	29	29	ER.A	-1
KCNK15	0.0411541	1	1	1	1	ER	0.0411541
NSMCE4A	0.0411541	1	1	1	1	ER	0.0411541
WWC1	0.0413758	3	3	19	18	ER	2.62164e-17
UXS1	0.0415191	2	2	5	5	ER	3.57655e-06
DAGLA	0.0415821	5	5	7	7	ER	1.08661e-07
IKBKE	0.041628	4	4	46	46	QA	-1
LAMB3	0.041758	17	16	156	143	QA	-1
TACC1	0.0417672	4	4	44	44	QA	-1
CEACAM8	0.0418794	4	4	4	4	ER	0.000284631
FBXO41	0.0420769	5	5	12	12	ER	5.79861e-11
HSD17B8	0.0421056	1	1	1	1	ER	0.0421056
MEOX2	0.042219	1	1	1	1	ER	0.042219
LMAN2	0.0422351	2	2	2	2	ER	0.00534739
DMWD	0.0422955	3	3	8	8	ER	9.42018e-09
RGL4	0.0423746	5	5	121	101	QA	-1
ACSL6	0.0423858	8	8	40	40	ER.A	-1
TOX4	0.0424676	2	2	2	2	ER	0.0044766
TTC30B	0.0424996	2	2	4	4	ER	0.00245898
SLC51B	0.0425874	1	1	3	3	ER	0.002193
ZNF70	0.0426471	3	3	3	3	ER	0.00131269
KBTBD4	0.0426731	2	2	2	2	ER	0.00878752
C1QTNF9B	0.0427326	2	2	11	9	ER	1.49802e-08
CDC23	0.0427724	3	3	75	75	QA	-1
SPATA17	0.0429175	2	2	12	12	ER	7.72803e-10
MYEOV2	0.0430624	1	1	1	1	ER	0.0430624
TMEM198	0.0430991	5	5	61	61	QA	-1
ZADH2	0.0432885	5	5	60	60	QA	-1
AMFR	0.0433298	3	3	60	60	QA	-1
KHSRP	0.0433432	1	1	5	5	ER	3.58604e-06
CD200R1	0.043582	1	1	3	3	ER	0.00215476
ZNF600	0.0435849	3	3	44	44	QA	-1
PSMD6	0.0436106	3	3	11	11	ER	6.82738e-11
SIMC1	0.0437236	3	3	35	35	ER.A	-1
DOLK	0.0437727	5	5	13	13	ER	2.86066e-13
P2RX5	0.0439556	4	3	69	69	QA	-1
ADRB1	0.0439951	3	3	46	46	QA	-1
DEPDC1B	0.0440423	5	5	37	37	ER.A	-1
OSGEPL1	0.0440549	3	3	19	19	ER	1.09223e-18
MICALCL	0.0440599	6	6	76	75	QA	-1
OR56A1	0.0442003	1	1	1	1	ER	0.0442003
SLC22A5	0.0442684	2	2	2	2	ER	0.00433855
MFAP4	0.0442802	1	1	1	1	ER	0.0442802
CTNNA2	0.0443027	4	4	4	4	ER	0.000101717
FLNB	0.044435	17	17	119	117	QA	-1
CLK2	0.0446836	3	3	33	33	ER.A	-1
BAMBI	0.0447143	2	2	5	5	ER	1.3025e-05
TEX35	0.0448315	2	2	8	8	ER	9.04691e-08
GIMAP4	0.0448655	5	5	10	10	ER	1.20904e-10
NUDT19	0.0448972	2	2	8	8	ER	1.77683e-08
MYLK2	0.0449376	3	3	18	18	ER	9.20705e-18
C18orf8	0.0451115	5	5	35	35	ER.A	-1
EXOC7	0.0452034	7	7	42	42	QA	-1
C5orf45	0.0454248	3	3	29	29	ER.A	-1
ZNF358	0.0455782	1	1	17	17	ER	3.25899e-16
C9orf9	0.0455863	3	3	11	11	ER	1.368e-10
PLG	0.0455949	11	11	79	79	QA	-1
CERKL	0.045678	2	2	5	5	ER	9.67992e-06
CREBBP	0.0457509	12	11	101	99	QA	-1
EML3	0.045854	4	4	66	66	QA	-1
ELMSAN1	0.0459177	4	4	22	22	ER.A	-1
TEKT1	0.0460004	2	2	6	6	ER	2.36671e-06
SOCS5	0.0462285	2	2	5	5	ER	2.17283e-05
FCRLA	0.0462717	5	5	58	57	QA	-1
CREB3	0.0464166	4	4	79	78	QA	-1
JPH3	0.0464506	12	12	89	88	QA	-1
ZNF43	0.0464947	4	4	61	61	QA	-1
ACSS3	0.0465059	6	6	74	73	QA	-1
NME7	0.0465967	3	3	29	29	ER.A	-1
TCF4	0.0467286	2	2	2	2	ER	0.00450962
OR2V1	0.0467812	1	1	1	1	ER	0.0467812
DGCR8	0.0468664	7	7	16	16	ER	2.35356e-15
RRNAD1	0.0471088	3	3	5	5	ER	1.7591e-05
TSPYL1	0.0471703	2	2	9	9	ER	4.42963e-10
SERPINI2	0.0471956	2	2	60	60	QA	-1
C19orf55	0.0471989	2	2	2	2	ER	0.00497994
ZNF418	0.047286	3	3	13	13	ER	8.28865e-12
MTUS1	0.0474684	20	20	158	157	QA	-1
NPAS3	0.0475362	1	1	1	1	ER	0.0475362
PHKG1	0.047707	5	5	36	36	ER.A	-1
C8orf22	0.0478836	1	1	1	1	ER	0.0478836
GOLGA4	0.0479622	15	15	83	82	QA	-1
GALNT14	0.0480553	5	5	22	22	ER.A	-1
BTBD17	0.0481112	1	1	1	1	ER	0.0481112
RCOR1	0.0481112	1	1	1	1	ER	0.0481112
DCD	0.0481878	1	1	55	53	QA	-1
EIF3L	0.0484404	1	1	1	1	ER	0.0484404
STUB1	0.0484737	3	3	3	3	ER	0.000407469
PRKCQ	0.0484991	6	6	59	59	QA	-1
SLC24A2	0.0486059	4	4	22	22	ER.A	-1
UBTD2	0.0487331	2	2	3	3	ER	0.000195079
PLEKHG2	0.0487731	5	5	19	19	ER	9.40933e-17
CDH7	0.0488465	2	2	2	2	ER	0.00662747
CD48	0.0488579	3	3	12	12	ER	1.0385e-11
MYCBP2	0.0489628	22	21	89	88	QA	-1
PNMAL1	0.048973	5	5	93	93	QA	-1
SPEM1	0.0490759	3	3	24	24	ER.A	-1
PTPRG	0.0493061	18	18	33	33	ER.A	-1
ABCC10	0.0495611	17	17	135	133	QA	-1
DMRT3	0.0495722	5	5	82	81	QA	-1
DGCR6	0.0496442	1	1	2	2	ER	0.0496442
CIPC	0.0496623	4	4	22	22	ER.A	-1
PALD1	0.0497805	12	12	47	47	QA	-1
MMP20	0.0498415	3	3	42	41	QA	-1
PPP1R32	0.0498999	5	5	16	16	ER	1.18899e-15
CCDC93	0.0499791	7	7	14	14	ER	9.58071e-14
GUCY1A2	0.0500058	6	6	9	9	ER	7.05924e-10
CD5L	0.050016	4	4	4	4	ER	0.000443932
MRGPRE	0.0502933	3	3	13	13	ER	7.36112e-13
SDCCAG8	0.0503294	2	2	2	2	ER	0.0145794
MRVI1	0.05037	5	5	37	37	ER.A	-1
OR5D16	0.0506337	1	1	1	1	ER	0.0506337
BSN	0.0509515	29	29	152	150	QA	-1
ENDOD1	0.0510407	2	2	2	2	ER	0.00676054
OR51B4	0.0510541	3	3	17	17	ER	1.133e-17
FAM159A	0.0511159	3	3	51	51	QA	-1
BMP5	0.0513732	5	5	34	34	ER.A	-1
GPR135	0.0514145	1	1	1	1	ER	0.0514145
ZNF597	0.0514163	1	1	21	21	ER.A	-1
LRRC18	0.0514645	3	3	3	3	ER	0.00426761
EMP1	0.0514837	1	1	3	3	ER	0.00320713
ACAD8	0.0515104	4	4	51	51	QA	-1
POU4F3	0.0515613	2	2	2	2	ER	0.00721422
PPP2R4	0.0515685	1	1	3	3	ER	0.00319639
CNDP1	0.0516307	2	2	2	2	ER	0.00481628
AKR1D1	0.0517286	2	2	7	7	ER	2.07366e-08
LRIF1	0.0518028	4	4	23	23	ER.A	-1
KCNS1	0.0518151	4	4	66	65	QA	-1
LECT1	0.0518389	1	1	1	1	ER	0.0518389
OR5H14	0.0518389	1	1	1	1	ER	0.0518389
ZNF286A	0.0518389	1	1	1	1	ER	0.0518389
PCDHB11	0.0519019	4	4	12	12	ER	1.49552e-12
XPO5	0.0519284	1	1	31	31	ER.A	-1
PDHX	0.0519352	7	7	60	60	QA	-1
MBP	0.0521105	2	2	18	18	ER	7.6624e-16
EFR3A	0.0521785	5	5	39	39	ER.A	-1
ZNF709	0.0521906	1	1	1	1	ER	0.0521906
MC3R	0.0524337	4	4	9	8	ER	2.43691e-08
ERGIC1	0.0524885	3	3	46	46	QA	-1
JPH1	0.0525332	5	5	44	44	QA	-1
ENGASE	0.0525984	6	6	61	61	QA	-1
MMP3	0.0526493	6	6	12	12	ER	1.49147e-11
OR2AG2	0.0527127	4	4	31	31	ER.A	-1
TMEM134	0.052715	2	2	18	18	ER	1.10841e-17
MAP6	0.0527804	7	7	96	96	QA	-1
FGF5	0.0529258	1	1	4	4	ER	0.000115095
AUH	0.0529997	2	2	3	3	ER	0.000197021
AGTPBP1	0.0530243	7	7	36	36	ER.A	-1
TNFRSF9	0.0530625	2	2	8	8	ER	2.74156e-08
PDE6C	0.0533717	11	11	110	108	QA	-1
KCNK18	0.0533801	4	4	24	24	ER.A	-1
ORAOV1	0.0534424	2	2	3	3	ER	0.00263714
RAPGEF2	0.0535774	8	8	65	65	QA	-1
LYSMD1	0.0536828	1	1	1	1	ER	0.0536828
SPRR1B	0.0536828	1	1	1	1	ER	0.0536828
VN1R4	0.0536828	1	1	1	1	ER	0.0536828
ZNF121	0.0536828	1	1	1	1	ER	0.0536828
NR5A1	0.0537062	2	2	2	2	ER	0.0056956
KCNJ16	0.0537273	5	5	38	38	ER.A	-1
CENPE	0.053731	8	8	62	62	QA	-1
LRP10	0.0539258	11	11	88	88	QA	-1
SLC25A45	0.0540117	1	1	6	6	ER	1.08084e-05
TFRC	0.0540381	2	2	2	2	ER	0.00601188
SLC25A4	0.0541743	2	2	4	4	ER	4.51871e-05
ZNF143	0.0542083	4	4	24	24	ER.A	-1
CAPN1	0.054229	4	4	22	22	ER.A	-1
NME6	0.0543123	1	1	7	7	ER	6.47163e-07
OTUD3	0.05442	3	3	91	89	QA	-1
HSD3B1	0.0544251	2	2	2	2	ER	0.007329
HN1	0.0544419	4	4	26	26	ER.A	-1
SYT17	0.0544907	5	5	34	34	ER.A	-1
UBR3	0.0545095	3	3	13	13	ER	1.66077e-12
GPC2	0.0546219	1	1	1	1	ER	0.0546219
PPAPDC3	0.0546219	1	1	1	1	ER	0.0546219
TNIK	0.0547327	4	4	48	47	QA	-1
CDC42EP4	0.0547477	3	3	28	28	ER.A	-1
PCDHA3	0.0548507	5	5	36	36	ER.A	-1
OR12D3	0.0548556	2	2	4	4	ER	9.67854e-05
TRABD2A	0.0548663	5	5	19	19	ER	1.16635e-17
SH2D7	0.0549313	3	2	31	31	ER.A	-1
FOS	0.0549612	1	1	1	1	ER	0.0549612
ITFG2	0.0549837	4	4	10	10	ER	3.92961e-11
RELT	0.05518	5	5	65	65	QA	-1
MAT1A	0.0551833	3	3	5	5	ER	1.12536e-05
MFN2	0.055186	9	9	51	51	QA	-1
EOMES	0.0552587	1	1	1	1	ER	0.0552587
SEC63	0.0552587	1	1	1	1	ER	0.0552587
KANSL2	0.0553002	2	2	15	15	ER	2.12067e-14
PARP12	0.0555235	2	2	4	4	ER	8.83207e-05
SETBP1	0.0557638	10	10	16	16	ER	1.68418e-16
CD37	0.0557897	1	1	8	8	ER	7.6733e-08
CARKD	0.0559074	4	4	13	13	ER	1.02454e-11
WNT8A	0.0559843	1	1	1	1	ER	0.0559843
UBAC2	0.0560432	4	4	6	6	ER	1.6746e-06
EHMT1	0.0564737	6	6	54	54	QA	-1
SORT1	0.0564781	7	7	35	35	ER.A	-1
ABHD14A-ACY1	0.0565455	1	1	24	24	ER.A	-1
MOB3A	0.0566515	5	5	29	29	ER.A	-1
AKNAD1	0.0566768	2	2	3	3	ER	0.00216988
ALG3	0.0566807	3	3	33	33	ER.A	-1
CDH3	0.0567962	8	8	75	75	QA	-1
C2orf54	0.0568079	2	2	4	4	ER	0.000192617
SEC61B	0.0568598	1	1	36	36	ER.A	-1
ALDH9A1	0.0569806	8	8	48	48	QA	-1
GLCE	0.0571471	2	2	3	3	ER	0.00308589
PTPRE	0.0571605	8	8	50	50	QA	-1
ENTPD7	0.0572624	3	3	3	3	ER	0.00051695
SFT2D1	0.0573066	1	1	8	8	ER	3.7112e-08
AUNIP	0.0574045	6	6	18	18	ER	3.70434e-16
ACOT12	0.057484	8	8	24	24	ER.A	-1
KREMEN1	0.0574996	4	4	26	26	ER.A	-1
PACSIN2	0.0576034	5	5	29	29	ER.A	-1
ANXA6	0.0577724	7	7	42	42	QA	-1
KCNQ5	0.0578166	4	4	7	7	ER	3.7354e-08
NAIP	0.0578178	2	2	3	3	ER	0.00310677
ARL14	0.0580196	2	2	8	8	ER	2.63245e-08
PTPN6	0.0580952	4	4	32	32	ER.A	-1
UQCC1	0.0581311	5	5	23	23	ER.A	-1
KIAA0196	0.0583101	2	2	29	29	ER.A	-1
LNP1	0.0583787	2	2	4	4	ER	0.000109085
RIMS1	0.0584717	1	1	1	1	ER	0.0584717
HOXB3	0.0586194	2	2	33	33	ER.A	-1
ATF7	0.0586415	1	1	1	1	ER	0.0586415
PRADC1	0.0586606	2	2	2	2	ER	0.00646585
TBL3	0.0586764	7	7	80	80	QA	-1
GNAT2	0.0588162	1	1	1	1	ER	0.0588162
CD55	0.0588227	3	2	14	14	ER	5.07189e-14
ERICH1	0.058922	1	1	12	12	ER	2.3182e-11
DKK4	0.0589768	2	2	2	2	ER	0.00813949
ZNF274	0.0590591	2	2	10	10	ER	4.39278e-10
VPREB3	0.0592118	2	2	29	28	ER.A	-1
GPR3	0.059239	3	3	10	10	ER	5.64329e-10
ZFYVE27	0.059289	3	3	20	20	ER	3.68365e-21
FCHO2	0.0593902	1	1	6	6	ER	2.35764e-07
ARFGEF1	0.059404	6	6	23	23	ER.A	-1
ZNF607	0.059432	9	9	25	25	ER.A	-1
CPNE9	0.0594635	5	5	58	58	QA	-1
PTCD3	0.0595343	6	6	30	30	ER.A	-1
RNF113B	0.0595384	1	1	1	1	ER	0.0595384
OR5M9	0.0595666	5	5	9	9	ER	4.11943e-09
HIST1H1C	0.0596302	8	8	9	9	ER	9.59101e-09
PHYKPL	0.0596351	2	2	8	7	ER	2.88365e-07
PHF21B	0.0596461	3	3	7	7	ER	6.32701e-08
YBEY	0.059691	2	2	2	2	ER	0.00703121
RALY	0.0597499	2	2	20	20	ER	5.23288e-20
CD200	0.0598423	3	3	3	3	ER	0.000594984
KRT15	0.0599124	4	4	22	22	ER.A	-1
STT3A	0.059985	1	1	1	1	ER	0.059985
CCT7	0.0600436	1	1	1	1	ER	0.0600436
GPR149	0.0600576	4	4	16	16	ER	5.12249e-15
CNKSR3	0.0602133	3	3	3	3	ER	0.000546064
SOBP	0.06026	3	3	8	8	ER	1.17072e-09
STIM2	0.060325	7	7	75	74	QA	-1
MN1	0.0604512	5	5	16	16	ER	3.76954e-15
KCTD17	0.0604921	1	1	1	1	ER	0.0604921
BARHL1	0.0605631	1	1	5	5	ER	9.93376e-06
CUEDC1	0.0605865	1	1	1	1	ER	0.0605865
COX6A1P2	0.060653	1	1	2	2	ER	0.00183525
PARVG	0.0609255	8	7	68	67	QA	-1
PDPN	0.060929	1	1	1	1	ER	0.060929
BLNK	0.061009	4	4	38	38	ER.A	-1
LRTM2	0.061091	4	4	33	33	ER.A	-1
SDC4	0.0612355	2	2	39	39	ER.A	-1
MIA	0.061279	2	2	16	16	ER	2.04502e-16
MGAT5B	0.0612861	4	4	85	84	QA	-1
SGSM1	0.0614244	4	4	19	18	ER	2.14632e-18
HIBADH	0.0615314	2	2	2	2	ER	0.00716661
PBK	0.0616714	3	3	7	7	ER	2.8577e-07
BIN3	0.0617798	8	8	94	93	QA	-1
DEFB132	0.0618273	1	1	9	9	ER	3.45886e-09
MOGAT2	0.0618726	5	5	6	6	ER	9.47633e-07
ZNF675	0.0619181	2	2	3	3	ER	0.000646915
ZNF551	0.0619448	4	4	43	43	QA	-1
LRRC16A	0.0619541	8	8	42	41	QA	-1
FRMD8	0.0620763	1	1	1	1	ER	0.0620763
ALAD	0.0621851	4	4	25	25	ER.A	-1
CNN1	0.0622338	4	4	34	34	ER.A	-1
NECAP2	0.0622823	4	4	5	5	ER	5.05671e-06
TTC12	0.0623543	3	3	6	6	ER	4.65967e-07
DUS4L	0.0623934	2	2	2	2	ER	0.00775498
CWC22	0.0624466	6	6	47	47	QA	-1
ST7	0.0625247	1	1	1	1	ER	0.0625247
ACP1	0.0626507	1	1	1	1	ER	0.0626507
IFNA6	0.0626507	1	1	1	1	ER	0.0626507
MAD2L2	0.0626507	1	1	1	1	ER	0.0626507
BTLA	0.0626513	1	1	1	1	ER	0.0626513
MRPL35	0.0626742	1	1	10	10	ER	1.43625e-10
THAP6	0.0628669	3	3	10	10	ER	8.19429e-09
2022-03-07	0.0630538	3	3	14	14	ER	7.72465e-16
BANK1	0.0630945	4	4	65	65	QA	-1
SLC13A2	0.0631068	4	4	4	4	ER	3.06728e-05
RPP21	0.0631711	3	3	3	3	ER	0.00250996
CDC25B	0.0632284	5	5	22	22	ER.A	-1
LEPREL4	0.0632762	2	2	16	16	ER	6.34764e-15
HNF4A	0.0632928	4	4	6	6	ER	1.29088e-05
LYZL1	0.0633093	1	1	1	1	ER	0.0633093
TMEM110-MUSTN1	0.0633093	1	1	1	1	ER	0.0633093
FRMD4B	0.0634133	7	7	33	33	ER.A	-1
C8A	0.0634516	3	3	6	6	ER	1.66931e-07
SLC25A39	0.0634569	7	7	47	47	QA	-1
NPEPPS	0.0634654	5	5	16	16	ER	2.48952e-15
TLN2	0.0634775	18	18	189	186	QA	-1
FAHD2B	0.0634936	1	1	1	1	ER	0.0634936
ZDBF2	0.0635256	16	16	206	202	QA	-1
SCGB3A2	0.0635678	1	1	8	8	ER	5.27758e-08
GAL3ST3	0.0636335	1	1	4	4	ER	0.00014674
NBN	0.0636774	7	7	25	25	ER.A	-1
SGMS1	0.0638511	1	1	9	9	ER	1.20078e-09
2022-03-08	0.0638881	1	1	5	5	ER	9.73644e-06
MCMDC2	0.0638979	3	3	3	3	ER	0.000782476
NUP88	0.0639734	8	8	51	50	QA	-1
VGF	0.0640088	2	2	24	24	ER.A	-1
VPS33B	0.0641943	7	7	19	19	ER	2.63793e-19
IFNA2	0.0642825	1	1	1	1	ER	0.0642825
PCDH18	0.064298	8	8	18	18	ER	1.75354e-19
SRSF5	0.0646462	4	4	10	10	ER	9.04256e-11
NUDT22	0.064791	3	3	6	6	ER	2.31194e-06
ATP13A2	0.0648872	10	9	34	34	ER.A	-1
MYL2	0.0649001	2	2	6	6	ER	8.10061e-07
CYTIP	0.0649304	2	2	28	28	ER.A	-1
LGALS3BP	0.064934	2	2	19	19	ER	4.5276e-18
LGR6	0.0649768	7	7	22	22	ER.A	-1
ABHD17B	0.0651043	1	1	1	1	ER	0.0651043
BPGM	0.0651043	1	1	1	1	ER	0.0651043
CCRL2	0.0651043	1	1	1	1	ER	0.0651043
CELF3	0.0651043	1	1	1	1	ER	0.0651043
KLHL26	0.0653054	1	1	1	1	ER	0.0653054
MLEC	0.0653054	1	1	1	1	ER	0.0653054
LAX1	0.0654396	1	1	1	1	ER	0.0654396
IGFL2	0.0654614	2	2	5	5	ER	3.04784e-05
ZNF221	0.0655104	5	5	10	10	ER	1.27581e-09
DUSP26	0.06557	2	2	9	9	ER	1.6965e-09
SCFD2	0.0656865	8	8	35	35	ER.A	-1
PLXND1	0.0658003	5	5	28	28	ER.A	-1
KIF14	0.0658483	3	3	9	9	ER	1.22517e-09
OR10G8	0.065853	3	3	14	14	ER	7.75711e-14
CPN1	0.0658669	1	1	1	1	ER	0.0658669
VASH2	0.0658924	2	2	10	10	ER	4.03458e-10
XBP1	0.0659074	2	2	26	26	ER.A	-1
LYPD2	0.0659749	1	1	22	22	ER.A	-1
CCNK	0.066006	1	1	1	1	ER	0.066006
CPEB4	0.066006	1	1	1	1	ER	0.066006
GZMK	0.066006	1	1	1	1	ER	0.066006
ZMYND8	0.0660406	4	3	24	24	ER.A	-1
FAM24A	0.0663186	1	1	37	37	ER.A	-1
GDAP2	0.0664928	7	7	30	30	ER.A	-1
EXTL3	0.0665397	9	9	32	32	ER.A	-1
LRRC31	0.0666926	6	6	11	11	ER	2.92854e-11
SNAP25	0.0667039	2	2	3	3	ER	0.000283685
OIT3	0.0667807	6	6	54	54	QA	-1
KCNK10	0.0667941	4	3	16	16	ER	6.92356e-16
CST9	0.0668103	4	4	24	24	ER.A	-1
HK3	0.0669568	17	17	169	168	QA	-1
MYH14	0.0670621	4	3	27	27	ER.A	-1
LIF	0.0673451	2	2	2	2	ER	0.0134235
C2orf57	0.0673543	4	4	24	24	ER.A	-1
CXCL16	0.0676058	1	1	25	25	ER.A	-1
SETD6	0.0676699	6	6	37	37	ER.A	-1
PMEPA1	0.0677152	2	2	64	63	QA	-1
SLAMF9	0.0680088	1	1	39	39	ER.A	-1
CSRNP2	0.0680255	3	3	7	7	ER	6.60156e-08
GPR68	0.0680467	1	1	1	1	ER	0.0680467
UNC93B1	0.0680467	1	1	1	1	ER	0.0680467
GLDC	0.0680956	5	5	15	15	ER	1.21712e-14
APMAP	0.0681178	7	7	32	32	ER.A	-1
PDYN	0.0681215	1	1	1	1	ER	0.0681215
APOBEC3F	0.0682365	2	2	6	6	ER	2.18811e-06
SH3RF1	0.0684772	2	2	26	26	ER.A	-1
TMEM109	0.0685636	1	1	4	4	ER	0.00032465
CLEC12A	0.0686632	2	2	20	20	ER	7.00875e-19
DDX52	0.0687862	2	2	7	7	ER	2.33371e-08
AKAP5	0.068832	3	3	3	3	ER	0.000825109
CD163	0.0688533	5	5	42	42	QA	-1
QTRTD1	0.0688747	4	4	51	51	QA	-1
GABRD	0.0688969	1	1	1	1	ER	0.0688969
SOX4	0.0689613	1	1	24	24	ER.A	-1
LYRM7	0.0689945	1	1	11	11	ER	7.15575e-12
WISP2	0.0691175	1	1	1	1	ER	0.0691175
RABL3	0.0692138	3	3	19	19	ER	7.14665e-19
FAM195A	0.0692152	2	2	16	16	ER	4.08145e-14
ZNF688	0.0694142	1	1	19	19	ER	1.17507e-17
KCNJ5	0.0694225	1	1	5	5	ER	1.03656e-05
RRAS	0.0694639	1	1	1	1	ER	0.0694639
MGEA5	0.0695755	4	4	12	12	ER	1.6468e-12
CDYL	0.069778	6	6	17	17	ER	5.6887e-16
PLS1	0.0698306	5	5	50	50	QA	-1
GCNT1	0.0698523	2	2	2	2	ER	0.00774826
PACRGL	0.0698755	4	2	2	2	ER	0.0148271
GNA12	0.0699724	1	1	1	1	ER	0.0699724
GPN2	0.0699724	1	1	1	1	ER	0.0699724
IQUB	0.0700493	4	3	32	31	ER.A	-1
RSPRY1	0.0701093	3	3	9	9	ER	2.77477e-08
PPP3CC	0.0702327	4	4	22	22	ER.A	-1
RPTOR	0.0703594	2	2	65	64	QA	-1
CNPY2	0.070595	1	1	1	1	ER	0.070595
HM13	0.070595	1	1	1	1	ER	0.070595
PNPT1	0.070595	1	1	1	1	ER	0.070595
SLC41A3	0.070595	1	1	1	1	ER	0.070595
ERN1	0.0706337	2	2	3	3	ER	0.000621042
ELMO2	0.0706663	2	2	2	2	ER	0.00887352
HSD17B2	0.0706912	6	6	49	48	QA	-1
KCNT1	0.0707307	10	10	25	25	ER.A	-1
HS2ST1	0.0707952	3	3	22	22	ER.A	-1
PLEKHM3	0.0708565	6	6	13	13	ER	3.76364e-11
EPX	0.0708587	3	3	26	26	ER.A	-1
C21orf91	0.0708635	1	1	1	1	ER	0.0708635
AP3D1	0.0710683	7	7	52	51	QA	-1
FAM175A	0.0711271	5	5	15	15	ER	1.37335e-13
DLGAP3	0.0712506	4	4	35	35	ER.A	-1
TMEM170A	0.0714033	3	3	39	39	ER.A	-1
SNAPIN	0.071416	1	1	5	5	ER	1.08031e-05
IRX4	0.0716855	1	1	1	1	ER	0.0716855
TRIM22	0.0717331	3	2	13	12	ER	1.27022e-10
TSPO	0.0717825	1	1	4	4	ER	0.000357976
IRF7	0.0718978	4	4	24	24	ER.A	-1
HNRNPU	0.0719254	3	3	27	27	ER.A	-1
ZNF134	0.0720231	5	5	48	48	QA	-1
TRAF3	0.0720751	5	3	10	10	ER	1.16441e-08
CHRNA1	0.0721056	6	6	9	9	ER	1.69664e-09
SOX10	0.0721184	1	1	1	1	ER	0.0721184
WDR55	0.0722937	3	3	14	14	ER	1.47885e-12
NTSR1	0.0723055	9	9	127	109	QA	-1
C1R	0.0724891	1	1	1	1	ER	0.0724891
HCFC2	0.0725939	3	3	5	5	ER	0.00010035
SAMD4B	0.072785	6	6	87	87	QA	-1
ESCO2	0.0728043	1	1	4	4	ER	0.000295193
ZNF547	0.072866	2	2	3	3	ER	0.00093226
TTC7A	0.0728996	14	14	221	162	QA	-1
ZNF671	0.0729162	3	3	7	7	ER	1.59335e-07
PLEKHA1	0.0731248	5	5	41	41	QA	-1
BAZ1A	0.0731324	1	1	1	1	ER	0.0731324
TMEM139	0.0731324	1	1	1	1	ER	0.0731324
LHFPL2	0.0731513	3	3	43	43	QA	-1
SFXN3	0.0732181	6	6	67	67	QA	-1
GYS2	0.0734403	4	4	28	28	ER.A	-1
AC129492.6	0.0734439	1	1	19	19	ER	3.02699e-17
NDUFA13	0.0734471	3	2	9	9	ER	4.35994e-09
NOL10	0.0735324	1	1	1	1	ER	0.0735324
NFKBID	0.0735698	1	1	11	11	ER	2.48142e-12
ERAL1	0.0735889	2	2	17	17	ER	3.29871e-15
EVPLL	0.0736406	2	2	20	20	ER	4.94636e-19
METTL24	0.0736474	6	6	43	43	QA	-1
PDGFC	0.0737988	2	2	20	20	ER	2.06921e-19
SMARCD1	0.0738786	1	1	1	1	ER	0.0738786
CSMD1	0.0739446	31	31	288	260	QA	-1
CYP2A6	0.0740543	4	4	11	11	ER	1.1236e-09
DOCK6	0.0741009	3	3	5	5	ER	4.89665e-05
ASAP2	0.0741131	2	2	6	6	ER	2.16058e-06
SLC9A1	0.0744281	4	4	7	7	ER	5.67574e-07
APLP1	0.0744663	5	5	16	16	ER	2.74477e-13
PHOSPHO2	0.0745501	2	2	9	9	ER	2.11916e-09
TTF2	0.074575	10	10	38	38	ER.A	-1
ZNF778	0.0746398	13	13	105	105	QA	-1
FGF2	0.0748268	1	1	1	1	ER	0.0748268
CHRNE	0.0748852	5	5	81	80	QA	-1
GUCY2C	0.075175	6	6	51	51	QA	-1
MRGPRX4	0.0751906	3	3	14	13	ER	4.46809e-12
CD1E	0.0752076	1	1	1	1	ER	0.0752076
TMCC1	0.0752076	1	1	1	1	ER	0.0752076
TNFSF18	0.0752197	1	1	1	1	ER	0.0752197
UNG	0.0752197	1	1	1	1	ER	0.0752197
ZNF131	0.0752197	1	1	1	1	ER	0.0752197
CLDN4	0.0752283	1	1	22	22	ER.A	-1
CD19	0.0752731	1	1	1	1	ER	0.0752731
LRRFIP2	0.0752921	4	4	7	7	ER	4.26002e-07
TARS2	0.0753262	1	1	1	1	ER	0.0753262
DIRC2	0.0753845	6	6	84	84	QA	-1
GPR56	0.0754794	5	5	46	46	QA	-1
FAM63A	0.0755812	5	5	22	22	ER.A	-1
TMEM87B	0.0757758	2	2	17	17	ER	4.20321e-17
FAM208A	0.0758256	6	5	9	9	ER	1.02813e-07
SPRED3	0.0759391	1	1	1	1	ER	0.0759391
LAMB1	0.075944	21	21	182	174	QA	-1
AHR	0.0760208	4	3	49	49	QA	-1
CDH22	0.0760237	4	4	6	6	ER	5.35599e-07
IL12RB1	0.0760503	6	6	59	59	QA	-1
DRAXIN	0.0761336	4	3	18	18	ER	7.95635e-19
DMXL1	0.0761857	21	19	161	159	QA	-1
CSK	0.0762107	2	2	2	2	ER	0.012766
TRMT10B	0.0762517	3	3	7	6	ER	2.67752e-05
CREB1	0.0762894	2	2	23	23	ER.A	-1
RAD23B	0.0762911	1	1	1	1	ER	0.0762911
TMEM64	0.0763561	2	2	5	5	ER	6.62523e-06
HTR5A	0.0763757	2	2	3	3	ER	0.00034204
TMPRSS13	0.0764587	3	3	13	13	ER	1.293e-13
EIF2D	0.0765143	4	3	11	11	ER	6.5714e-12
LIX1	0.0765576	3	3	33	33	ER.A	-1
BSPRY	0.0765844	2	2	58	58	QA	-1
GLDN	0.0766372	7	7	65	65	QA	-1
SLC8A1	0.0767122	6	6	9	9	ER	3.72169e-09
TLE1	0.0767144	2	2	2	2	ER	0.0106967
RABEPK	0.0767834	2	2	3	3	ER	0.000611057
RGS4	0.0769745	1	1	16	16	ER	2.93405e-16
GLTPD2	0.0770399	2	2	3	3	ER	0.000481961
EEFSEC	0.0771033	4	4	16	16	ER	5.41221e-15
OR8A1	0.0771933	1	1	1	1	ER	0.0771933
UBQLN3	0.0774707	9	9	78	78	QA	-1
LRRK2	0.077531	26	26	162	162	QA	-1
SLC25A30	0.0776634	2	2	3	3	ER	0.00071944
KDM4E	0.0777062	1	1	54	54	QA	-1
TAS1R1	0.077765	8	8	84	77	QA	-1
ANP32A	0.077822	1	1	1	1	ER	0.077822
CTC1	0.0778308	7	7	29	29	ER.A	-1
DFFB	0.0779533	1	1	5	5	ER	1.33237e-05
OR6M1	0.0780156	4	4	35	35	ER.A	-1
KRR1	0.0781017	2	2	10	10	ER	6.22538e-09
COPS3	0.0781082	3	3	10	10	ER	8.36271e-10
TAAR1	0.0783576	2	2	17	17	ER	6.28015e-17
DNAJC15	0.078431	1	1	8	8	ER	5.73543e-08
BTN2A1	0.0784682	6	6	41	41	QA	-1
PM20D2	0.0785008	2	2	10	8	ER	2.77062e-08
SYS1	0.0785094	1	1	1	1	ER	0.0785094
TMEM150C	0.0785094	1	1	1	1	ER	0.0785094
ZNF558	0.0786267	1	1	5	5	ER	1.11382e-05
C5orf42	0.0788601	10	9	47	47	QA	-1
NEK9	0.0788642	7	7	58	58	QA	-1
REV3L	0.0790475	16	16	72	72	QA	-1
PRSS8	0.0791888	2	2	3	3	ER	0.000373142
GPI	0.079382	6	6	39	39	ER.A	-1
OR6C65	0.0794531	3	3	5	5	ER	2.0406e-05
IFNAR1	0.0794808	3	2	6	6	ER	1.21417e-06
FAM26E	0.0795485	2	2	46	46	QA	-1
EDNRB	0.0795982	2	2	2	2	ER	0.014494
ELP2	0.0796993	3	3	58	58	QA	-1
PRKCA	0.0798513	3	3	3	3	ER	0.000825713
SQSTM1	0.0800159	5	5	14	14	ER	9.28864e-14
PAPD4	0.0801018	2	2	7	7	ER	6.52261e-07
SVIL	0.0804617	23	23	156	154	QA	-1
PCDHB2	0.0805254	3	3	24	24	ER.A	-1
GGT6	0.080542	4	4	6	6	ER	1.88794e-06
KRT34	0.0805554	7	7	32	32	ER.A	-1
ZNF701	0.0805804	1	1	62	62	QA	-1
YIPF4	0.0808591	2	2	15	15	ER	2.33707e-13
C9orf3	0.0808626	1	1	30	30	ER.A	-1
RAD54L	0.0809346	6	6	16	16	ER	5.34905e-15
CTSB	0.080967	8	8	16	16	ER	3.53291e-16
ZSCAN20	0.0810502	9	9	16	16	ER	1.13707e-14
USH1C	0.081062	8	8	27	27	ER.A	-1
ITPR1	0.0810742	1	1	1	1	ER	0.0810742
PPA2	0.0810742	1	1	1	1	ER	0.0810742
FXR1	0.0810799	2	2	3	3	ER	0.000447672
GOT1	0.0811686	3	3	43	42	QA	-1
DYNC1I1	0.0813343	2	2	11	11	ER	3.8189e-11
ENTPD2	0.081339	4	4	5	5	ER	6.9909e-05
WDR20	0.0814158	1	1	1	1	ER	0.0814158
GRIA1	0.0814999	7	7	7	7	ER	6.87846e-07
SURF6	0.0815682	3	3	3	3	ER	0.00117029
KIAA0100	0.0817813	17	17	130	129	QA	-1
RNASE9	0.0818259	1	1	8	8	ER	7.30841e-08
VGLL3	0.0818612	3	3	3	3	ER	0.00106782
CLEC9A	0.0819124	2	2	19	19	ER	3.47544e-17
GCK	0.0819389	3	3	21	21	ER.A	-1
NPHP4	0.0820499	21	21	144	135	QA	-1
CDC20	0.0821162	2	2	7	7	ER	7.37638e-08
FAM110A	0.0821201	1	1	7	7	ER	2.83033e-06
NRIP1	0.0821619	7	7	7	7	ER	1.15557e-07
PPP1R15B	0.0821765	5	5	20	20	ER	1.05218e-17
C10ORF68	0.0822421	1	1	2	2	ER	0.00308528
PEG10	0.0823534	1	1	10	10	ER	4.87814e-10
SLAMF8	0.0824465	9	9	44	44	QA	-1
ELP6	0.0824511	2	2	6	6	ER	1.95335e-06
B3GALT2	0.0825127	1	1	1	1	ER	0.0825127
DNA2	0.0825951	5	5	26	26	ER.A	-1
BTN2A2	0.0827127	3	3	63	63	QA	-1
PDIK1L	0.0827511	1	1	1	1	ER	0.0827511
MMP10	0.0829615	5	5	65	65	QA	-1
ZNF710	0.0831215	3	3	3	3	ER	0.00127776
FAM20B	0.0832152	6	6	58	58	QA	-1
ID3	0.0832258	5	5	6	6	ER	1.81975e-06
DNAJC17	0.0833559	3	3	46	46	QA	-1
ACTG1	0.0833595	2	2	5	5	ER	4.73841e-06
ARMC9	0.0833761	3	3	73	73	QA	-1
CAPNS2	0.0834178	1	1	1	1	ER	0.0834178
HOXA13	0.0834178	1	1	1	1	ER	0.0834178
MANEAL	0.0834178	1	1	1	1	ER	0.0834178
GJB2	0.0834246	6	6	18	18	ER	2.40661e-16
HERC4	0.0835068	3	3	11	11	ER	1.10953e-09
NXPE1	0.0835673	2	2	8	8	ER	2.23677e-08
ASGR2	0.0836701	3	3	6	6	ER	5.28079e-06
PHF23	0.0837723	3	3	19	19	ER	6.27291e-18
KIF15	0.0838093	7	7	69	67	QA	-1
CTSD	0.0838271	1	1	1	1	ER	0.0838271
GART	0.0838604	10	10	205	160	QA	-1
SMG8	0.0839077	2	2	19	19	ER	3.15093e-17
LRRC14	0.0840023	3	3	3	3	ER	0.000104796
PRKD3	0.0840439	6	6	96	95	QA	-1
SKI	0.0840615	2	2	3	3	ER	0.000756219
RP11-201K10.3	0.0840646	1	1	1	1	ER	0.0840646
DNAJB8	0.0841626	3	3	24	24	ER.A	-1
ISCU	0.084298	1	1	4	4	ER	0.000488784
UBXN6	0.0843211	1	1	1	1	ER	0.0843211
ZNF438	0.0843995	5	4	52	52	QA	-1
RBM26	0.0844145	4	4	34	34	ER.A	-1
COL8A2	0.0844265	1	1	2	2	ER	0.00355629
ANGPTL5	0.084472	5	5	56	52	QA	-1
C11orf70	0.0845226	1	1	31	31	ER.A	-1
SMC6	0.0846701	4	4	10	10	ER	2.94125e-11
KRT26	0.0846923	5	5	23	23	ER.A	-1
AVPR1A	0.0849326	5	5	45	45	QA	-1
SLC12A2	0.0851882	4	4	5	5	ER	9.44698e-06
KLHL41	0.0852682	4	4	37	37	ER.A	-1
TNFRSF13B	0.0854263	7	7	64	64	QA	-1
CCDC27	0.0854355	3	3	14	14	ER	7.20743e-13
MICAL3	0.0854537	11	11	142	141	QA	-1
RADIL	0.085481	5	5	64	64	QA	-1
B3GAT3	0.0855773	1	1	1	1	ER	0.0855773
TPX2	0.085598	2	2	5	5	ER	3.80599e-06
TCP11	0.0856267	4	4	26	26	ER.A	-1
KIAA1377	0.0857315	5	5	44	44	QA	-1
PLIN2	0.0858285	2	2	2	2	ER	0.00202096
IL36A	0.0858676	2	2	4	4	ER	5.94304e-05
DNAJB14	0.085914	1	1	1	1	ER	0.085914
YWHAB	0.085986	2	2	40	40	ER.A	-1
FLT3	0.086063	10	9	118	118	QA	-1
BCL2L2	0.0861129	1	1	14	14	ER	1.49125e-13
SEL1L3	0.0862003	8	8	22	22	ER.A	-1
GSDMC	0.086278	5	5	57	57	QA	-1
UBE3D	0.0863651	3	3	41	41	QA	-1
GRID1	0.0865519	8	8	60	59	QA	-1
HNRNPUL1	0.0867317	6	6	34	34	ER.A	-1
DGAT1	0.0867771	2	2	35	35	ER.A	-1
ANKRD6	0.0867969	1	1	15	15	ER	9.6188e-15
COMMD7	0.0870507	2	2	5	5	ER	4.48998e-05
CAV2	0.0870976	2	2	17	17	ER	9.46037e-18
COMMD5	0.0873323	3	3	26	26	ER.A	-1
C6	0.0875662	16	16	151	149	QA	-1
WDR34	0.0875969	4	4	67	67	QA	-1
INO80	0.0876223	5	5	23	23	ER.A	-1
CYP11B2	0.0876675	5	5	18	18	ER	1.39283e-17
EMP2	0.0878706	3	3	30	30	ER.A	-1
DIEXF	0.0879503	5	5	16	16	ER	1.01015e-14
TCAP	0.0879658	1	1	12	12	ER	1.64841e-10
RPF2	0.0879686	1	1	2	2	ER	0.00386102
ADAMTSL5	0.0880514	1	1	1	1	ER	0.0880514
FH	0.0880514	1	1	1	1	ER	0.0880514
LHX5	0.0880514	1	1	1	1	ER	0.0880514
PPP1R3B	0.0880514	1	1	1	1	ER	0.0880514
FARP2	0.0881918	10	10	87	87	QA	-1
CDKL4	0.0881981	1	1	11	11	ER	2.13445e-11
KIAA1644	0.0883089	2	2	2	2	ER	0.0020317
SP1	0.0884263	4	4	5	5	ER	1.33949e-05
AGFG1	0.088428	6	6	22	22	ER.A	-1
NELFA	0.0884989	2	2	2	2	ER	0.0153665
SPATA19	0.0885671	1	1	1	1	ER	0.0885671
ITGAD	0.0891545	10	9	60	60	QA	-1
RNF31	0.0891679	9	9	31	31	ER.A	-1
C9orf152	0.0892097	2	2	11	11	ER	5.20659e-11
PADI1	0.0893548	9	9	48	48	QA	-1
TRIP4	0.0896078	2	2	5	5	ER	1.83437e-05
ZW10	0.0897488	6	6	40	40	ER.A	-1
GPR1	0.089779	1	1	2	2	ER	0.0032909
CCT6A	0.0898265	2	2	3	3	ER	0.000592499
SH2D5	0.0898509	4	4	65	65	QA	-1
LRRC46	0.0898777	3	3	104	102	QA	-1
XKR9	0.0900634	3	3	9	9	ER	2.05324e-08
DEF6	0.0902824	3	3	42	42	QA	-1
PTTG1IP	0.0904362	1	1	43	43	QA	-1
GDPD5	0.0907454	4	4	33	32	ER.A	-1
L3MBTL2	0.0907859	3	3	3	3	ER	0.00118725
ACTN4	0.0908344	2	2	15	15	ER	1.44772e-14
DLK1	0.090863	2	2	38	38	ER.A	-1
PAPD5	0.0909187	1	1	2	2	ER	0.00220772
DOCK3	0.0910024	7	7	60	59	QA	-1
WNT2	0.0912512	2	2	26	26	ER.A	-1
PINX1	0.0912667	4	4	6	6	ER	1.36747e-05
DEPTOR	0.0913097	3	3	51	50	QA	-1
CASP14	0.091334	3	3	15	15	ER	6.68957e-15
CIAPIN1	0.0914145	4	4	14	14	ER	1.48764e-15
DDOST	0.0914216	3	3	43	43	QA	-1
MFSD3	0.0914286	1	1	10	10	ER	6.99847e-10
DNAJC28	0.0915174	6	6	72	59	QA	-1
GPR113	0.0915905	6	6	44	44	QA	-1
DKFZP761J1410	0.0915992	2	2	13	13	ER	1.16631e-12
MCRS1	0.0916239	4	4	44	44	QA	-1
OR1J2	0.0916608	2	2	45	45	QA	-1
SRRD	0.0916963	2	2	76	74	QA	-1
IGSF3	0.0917142	7	7	69	69	QA	-1
CCL21	0.092057	1	1	1	1	ER	0.092057
AGBL5	0.0921552	7	7	19	19	ER	3.97451e-20
PGR	0.0925198	7	7	71	71	QA	-1
CCDC36	0.0925749	2	2	2	2	ER	0.0219799
ETNPPL	0.0926199	2	2	12	12	ER	2.02583e-12
RSPH6A	0.0929138	7	7	74	74	QA	-1
OSBPL10	0.0930065	5	5	5	5	ER	3.16023e-06
NBEA	0.0931835	7	7	30	28	ER.A	-1
NMT1	0.0934249	1	1	1	1	ER	0.0934249
TMEM5	0.0934249	1	1	1	1	ER	0.0934249
HRH1	0.0934358	3	3	31	31	ER.A	-1
TNF	0.0934788	2	2	62	62	QA	-1
MRI1	0.0935292	2	2	48	48	QA	-1
C11orf35	0.0935437	1	1	2	2	ER	0.00434483
NPNT	0.0936754	7	7	18	18	ER	5.16783e-17
OR2F2	0.0936997	2	2	8	8	ER	3.48413e-09
IFNE	0.0937227	1	1	2	2	ER	0.00394729
IER5	0.0938499	1	1	5	5	ER	2.24698e-05
ITGA8	0.0942245	2	2	5	5	ER	1.44523e-05
STAC	0.0942709	5	5	13	13	ER	9.10511e-13
KEL	0.0943326	8	7	15	15	ER	5.19886e-12
PUS7L	0.0944843	5	5	68	66	QA	-1
CRP	0.094488	1	1	1	1	ER	0.094488
RNF168	0.094488	1	1	1	1	ER	0.094488
GBA	0.0945031	4	4	58	58	QA	-1
SH3D21	0.0945145	2	2	5	5	ER	1.14372e-05
C10orf118	0.094527	1	1	10	10	ER	1.0303e-09
GDA	0.0946154	2	2	2	2	ER	0.00236395
MAPK13	0.0946769	4	4	54	54	QA	-1
2022-09-08	0.0946952	5	5	18	18	ER	3.59945e-18
AMBP	0.0947939	4	4	19	19	ER	2.44292e-18
ARNT	0.0950557	1	1	1	1	ER	0.0950557
NEDD1	0.0950557	1	1	1	1	ER	0.0950557
OLFM4	0.0954211	2	2	2	2	ER	0.0158006
ALPK3	0.0955137	11	11	46	46	QA	-1
ARHGAP39	0.0957315	4	4	9	9	ER	1.05848e-09
DLL1	0.0958588	5	5	24	24	ER.A	-1
SERINC1	0.0958892	4	4	49	49	QA	-1
IRX2	0.0959237	1	1	2	2	ER	0.00420079
CDKN1A	0.095975	2	2	3	3	ER	0.000741166
SCAND3	0.0960231	8	8	117	83	QA	-1
SGCB	0.0960444	3	3	7	7	ER	4.4459e-07
RELA	0.0961309	5	5	10	10	ER	1.08348e-09
EIF2AK3	0.0961779	2	2	10	10	ER	1.3206e-09
ABCC5	0.096242	9	9	37	37	ER.A	-1
C14orf105	0.0965072	2	2	84	84	QA	-1
TULP1	0.0967246	3	3	11	11	ER	7.5955e-11
COMMD2	0.0970648	2	2	7	7	ER	2.36282e-07
SRSF12	0.0970793	2	2	5	5	ER	1.40496e-05
NAA35	0.0972502	5	5	41	41	QA	-1
ANO3	0.0973926	1	1	1	1	ER	0.0973926
CCDC59	0.0973926	1	1	1	1	ER	0.0973926
METRNL	0.0974782	2	2	2	2	ER	0.0268833
CFTR	0.0974936	19	19	264	261	QA	-1
SGSM3	0.0974965	4	4	7	7	ER	7.07992e-07
SEMA5B	0.0977163	4	4	61	61	QA	-1
MYH3	0.0977195	15	14	35	35	ER.A	-1
DNAJC18	0.0977225	2	2	27	27	ER.A	-1
TGDS	0.0978293	3	3	4	4	ER	0.000360655
SNW1	0.0978612	2	2	2	2	ER	0.00244491
NAT10	0.0978959	14	14	100	99	QA	-1
RANBP9	0.0979953	3	3	5	5	ER	6.59238e-06
GRAMD4	0.0981872	4	4	4	4	ER	1.45734e-05
CEP57L1	0.0982101	1	1	4	4	ER	0.000402411
RAI1	0.0982144	23	23	157	138	QA	-1
MKRN2	0.0984118	1	1	1	1	ER	0.0984118
CLYBL	0.0985819	1	1	9	9	ER	1.60111e-08
KSR1	0.0987043	5	5	114	112	QA	-1
IFT172	0.0987922	14	13	65	65	QA	-1
MZF1	0.0988707	2	2	26	26	ER.A	-1
C16orf58	0.0989961	5	5	30	30	ER.A	-1
COL3A1	0.0991207	5	5	55	55	QA	-1
ARHGDIB	0.0991913	1	1	13	13	ER	4.74484e-14
NCK2	0.0992895	1	1	1	1	ER	0.0992895
OSR1	0.0992895	1	1	1	1	ER	0.0992895
TNNT2	0.0992895	1	1	1	1	ER	0.0992895
FNDC8	0.0993651	2	2	3	3	ER	0.00100274
GPR26	0.0995248	2	2	7	7	ER	4.30959e-07
GIPC3	0.0995911	1	1	1	1	ER	0.0995911
OR6F1	0.0995911	1	1	1	1	ER	0.0995911
RAP1GAP	0.0995911	1	1	1	1	ER	0.0995911
FSCN3	0.0996122	8	8	47	46	QA	-1
SOCS1	0.0996566	1	1	4	4	ER	0.000494449
GEMIN6	0.0996623	1	1	1	1	ER	0.0996623
JTB	0.0996623	1	1	1	1	ER	0.0996623
TEX12	0.0997472	1	1	5	5	ER	3.8266e-05
FKBP1C	0.09982	1	1	43	43	QA	-1
RNF8	0.0998903	1	1	7	7	ER	7.24305e-08
GPR39	0.1002	7	7	45	44	QA	-1
GUCY2D	0.100228	6	6	9	9	ER	1.78272e-09
EDEM1	0.100442	3	3	7	7	ER	6.56039e-08
KATNB1	0.100598	1	1	4	4	ER	0.000438639
HFE2	0.100681	4	4	9	9	ER	1.01289e-10
TNNI1	0.100766	2	2	12	12	ER	3.96069e-12
C11orf42	0.100802	5	5	7	7	ER	2.28037e-06
KRBA2	0.100848	3	3	63	63	QA	-1
KRTAP13-2	0.101015	2	2	48	47	QA	-1
TCEA1	0.101018	1	1	57	56	QA	-1
USP14	0.101113	2	2	34	34	ER.A	-1
MAP2K6	0.101319	2	2	50	50	QA	-1
ZNF99	0.101452	2	2	4	2	ER	0.00357143
WFDC10A	0.101488	1	1	1	1	ER	0.101488
OR9Q2	0.101536	4	4	36	36	ER.A	-1
PLEKHG7	0.10158	3	3	5	5	ER	3.85204e-05
CUX2	0.101639	2	2	2	2	ER	0.028107
ECI1	0.101668	4	4	15	15	ER	4.30703e-14
HAS1	0.101747	2	1	23	23	ER.A	-1
ATXN1	0.101776	3	3	17	17	ER	3.13743e-16
ARHGAP17	0.101794	2	2	2	2	ER	0.00243563
HENMT1	0.101916	1	1	2	2	ER	0.0051416
ZNF362	0.102023	3	3	6	6	ER	3.22061e-07
POMC	0.102055	2	2	78	77	QA	-1
PHC1	0.102093	1	1	2	2	ER	0.00453379
ACAP2	0.102169	2	2	15	15	ER	2.3788e-14
PI4KB	0.102244	6	6	32	32	ER.A	-1
ELOVL2	0.102244	3	3	13	13	ER	4.42498e-11
TMEM182	0.102539	2	2	3	3	ER	5.98373e-05
CSPG4	0.102558	8	7	57	57	QA	-1
NRIP2	0.102611	4	4	62	62	QA	-1
RGS19	0.102625	2	2	8	8	ER	4.45244e-09
BEST1	0.102764	3	3	13	13	ER	4.05405e-11
ARHGEF7	0.10289	5	5	35	35	ER.A	-1
AK4	0.102894	2	2	22	22	ER.A	-1
RAD54L2	0.102908	10	10	76	76	QA	-1
ERO1LB	0.102965	2	2	11	11	ER	7.10317e-11
ZNF383	0.103163	2	2	31	31	ER.A	-1
UBXN2A	0.103182	2	2	65	65	QA	-1
TEX10	0.10324	3	3	11	11	ER	5.11936e-12
LETM1	0.103248	4	4	4	4	ER	0.000101605
LEPREL1	0.103282	6	6	50	50	QA	-1
OTOS	0.103322	2	2	3	3	ER	0.00109354
C1orf127	0.103403	6	6	18	18	ER	8.57368e-17
TCF23	0.103448	2	2	6	6	ER	1.33604e-05
ROBO1	0.103571	9	9	31	31	ER.A	-1
C10orf2	0.103912	1	1	2	2	ER	0.00472151
SLC43A3	0.103973	3	3	24	24	ER.A	-1
FAM193B	0.103983	2	2	8	8	ER	9.52512e-09
GPRC5C	0.104032	3	3	15	15	ER	5.43216e-15
TKTL2	0.104201	3	3	36	36	ER.A	-1
BLVRB	0.10423	4	4	43	43	QA	-1
ANKRA2	0.10424	3	3	17	17	ER	2.11742e-16
GRAMD1B	0.104246	4	4	7	7	ER	9.63376e-07
FAHD1	0.104327	3	3	6	6	ER	1.02144e-05
RECQL	0.104412	4	3	47	47	QA	-1
HERC2	0.104438	15	15	101	101	QA	-1
FAM71F1	0.104523	3	3	28	28	ER.A	-1
KCNE1	0.104574	1	1	1	1	ER	0.104574
SLC5A11	0.105018	6	6	20	20	ER	6.49114e-19
HLTF	0.105053	4	4	23	23	ER.A	-1
STX6	0.105111	3	3	12	12	ER	6.74777e-12
NPR2	0.105151	5	5	48	48	QA	-1
ABCF2	0.105161	3	3	27	27	ER.A	-1
U2AF1L4	0.105226	1	1	1	1	ER	0.105226
COL23A1	0.105295	6	6	30	29	ER.A	-1
PTPRK	0.10537	5	5	43	43	QA	-1
CEP85L	0.105485	7	7	49	49	QA	-1
GRM2	0.105524	7	7	42	42	QA	-1
TRPV5	0.105553	3	3	53	53	QA	-1
KIAA0408	0.105564	4	4	54	54	QA	-1
RTCA	0.105689	7	7	50	50	QA	-1
AKR1B15	0.105692	3	3	41	41	QA	-1
TIGIT	0.105728	2	2	3	3	ER	0.000660893
CBLB	0.105839	9	9	15	15	ER	3.26169e-13
PON3	0.106233	4	4	33	33	ER.A	-1
SLC13A5	0.106275	1	1	2	2	ER	0.00558404
FGFBP1	0.106332	2	1	15	15	ER	1.23939e-13
SYT11	0.10638	3	2	14	14	ER	3.03358e-13
ARHGAP28	0.106498	3	3	26	26	ER.A	-1
PEX13	0.106546	2	2	31	31	ER.A	-1
VPS9D1	0.106563	4	4	8	8	ER	3.98385e-08
ARMC1	0.106683	2	2	10	10	ER	6.53036e-10
ASPSCR1	0.106777	5	5	21	21	ER.A	-1
TOX3	0.106849	3	3	3	3	ER	0.00202529
FAM181A	0.107213	6	6	40	39	ER.A	-1
CACNA1E	0.107238	12	12	40	40	ER.A	-1
LPCAT2	0.1073	4	4	12	12	ER	4.12123e-11
SCYL1	0.107362	4	4	11	11	ER	4.21374e-12
CRYBB2	0.107494	2	2	5	5	ER	3.51971e-06
PATL1	0.107533	2	1	1	1	ER	0.107533
WDR19	0.107568	6	6	32	30	ER.A	-1
OR2A25	0.107606	4	4	75	75	QA	-1
RBM15B	0.107613	2	2	2	2	ER	0.0170194
KIF25	0.10763	1	1	2	2	ER	0.00525927
ATP1B2	0.107699	1	1	32	32	ER.A	-1
CHORDC1	0.107713	1	1	42	42	QA	-1
OR11H4	0.107773	4	4	62	61	QA	-1
CDHR3	0.107783	4	4	53	52	QA	-1
OCIAD2	0.107961	3	3	34	34	ER.A	-1
CAP1	0.108024	2	2	22	22	ER.A	-1
SNAPC4	0.108025	10	10	110	109	QA	-1
AQP1	0.108114	1	1	7	7	ER	6.50529e-08
MLXIP	0.108269	4	4	13	13	ER	2.37573e-12
ASH1L	0.10844	18	17	65	65	QA	-1
GGPS1	0.108531	2	2	14	14	ER	7.38606e-14
NINL	0.108579	11	11	88	87	QA	-1
NCKAP1L	0.108579	6	6	12	12	ER	1.14407e-11
ZP1	0.108675	4	4	66	66	QA	-1
COL9A3	0.108896	4	4	8	8	ER	2.74377e-08
DCAF5	0.108999	5	5	14	14	ER	1.77808e-13
APOBEC4	0.109122	2	2	7	7	ER	6.93235e-07
TRIB1	0.109187	2	2	9	9	ER	1.48892e-08
UNK	0.109197	1	1	14	14	ER	3.65482e-15
PDLIM1	0.10923	3	3	17	17	ER	8.39298e-17
TGM7	0.109236	9	9	94	94	QA	-1
OR6X1	0.109431	4	4	61	61	QA	-1
CTDSPL	0.109588	2	2	27	27	ER.A	-1
FBXW9	0.10964	5	5	91	89	QA	-1
BSND	0.110006	2	2	3	3	ER	0.00129136
N4BP3	0.110028	1	1	40	40	ER.A	-1
TTC22	0.110569	2	2	3	3	ER	0.00192636
SLC13A4	0.11058	3	3	32	32	ER.A	-1
CHSY1	0.110718	1	1	1	1	ER	0.110718
DDX17	0.110718	1	1	1	1	ER	0.110718
KRT6B	0.110718	1	1	1	1	ER	0.110718
MESDC2	0.110718	1	1	1	1	ER	0.110718
LINC01098	0.110795	1	1	22	21	ER.A	-1
SUSD4	0.110963	4	4	4	4	ER	0.000123284
HSD17B14	0.111029	3	3	20	20	ER	5.44392e-20
HSPD1	0.111078	2	2	2	2	ER	0.023027
ITGB5	0.111121	8	8	108	107	QA	-1
HTRA2	0.111131	1	1	22	22	ER.A	-1
KRT8	0.111223	4	4	38	38	ER.A	-1
UBR2	0.111431	13	13	86	83	QA	-1
SLPI	0.11168	1	1	39	39	ER.A	-1
PRSS53	0.111729	4	4	88	88	QA	-1
SIGIRR	0.111773	4	4	35	35	ER.A	-1
PLAUR	0.111866	2	2	54	54	QA	-1
EVX2	0.111963	1	1	14	14	ER	6.99076e-12
RASAL1	0.112062	5	5	40	40	ER.A	-1
LEPR	0.112215	2	2	2	2	ER	0.0292731
OPRL1	0.112431	6	5	9	9	ER	4.35312e-09
PTPDC1	0.112673	10	10	151	126	QA	-1
HDLBP	0.112753	5	5	15	15	ER	3.16587e-13
FBXO18	0.112767	9	9	47	46	QA	-1
ABHD15	0.112776	3	3	55	55	QA	-1
DSTYK	0.112785	3	3	3	3	ER	0.00252219
GNMT	0.112907	1	1	1	1	ER	0.112907
MON1A	0.112916	2	2	12	12	ER	3.88538e-13
IGFBP6	0.112941	2	2	5	5	ER	2.24129e-05
AMER2	0.112987	4	4	18	18	ER	2.0626e-17
CNTNAP5	0.112995	9	9	58	58	QA	-1
HSD17B11	0.113039	2	2	6	6	ER	6.01327e-07
EPS8L2	0.113121	2	2	7	7	ER	3.03562e-07
FGF23	0.113153	1	1	1	1	ER	0.113153
SULT1C2	0.113159	5	5	45	45	QA	-1
C1orf110	0.113254	5	5	19	19	ER	1.93541e-17
PAPOLA	0.113255	2	2	3	3	ER	0.0081402
PTPN1	0.113283	1	1	1	1	ER	0.113283
KIAA1468	0.113294	3	3	4	4	ER	0.000489684
ZBTB1	0.113298	5	5	25	25	ER.A	-1
ALG5	0.113382	4	4	16	16	ER	4.77426e-15
ABCB11	0.113447	9	9	29	23	ER.A	-1
RNF167	0.113512	3	3	6	6	ER	2.78925e-06
BOK	0.113601	1	1	4	4	ER	0.000452119
PHPT1	0.113705	1	1	6	6	ER	1.05479e-06
C19orf26	0.113741	2	2	34	34	ER.A	-1
P2RX1	0.114004	4	4	35	35	ER.A	-1
MRPL16	0.114178	2	2	24	24	ER.A	-1
WBP2	0.114209	2	2	2	2	ER	0.0034538
GPATCH2L	0.114224	2	2	2	2	ER	0.0207996
CCR2	0.114418	2	2	5	5	ER	5.93134e-05
DIP2A	0.114565	16	16	40	40	ER.A	-1
B3GNTL1	0.114659	5	5	24	24	ER.A	-1
TDRD6	0.114844	11	11	154	115	QA	-1
PALM	0.114872	4	4	9	9	ER	1.10382e-09
TMTC3	0.11489	3	3	6	6	ER	2.33423e-06
LDLR	0.114898	12	12	74	74	QA	-1
UPF2	0.115064	2	2	5	5	ER	2.51931e-06
SIL1	0.115228	5	5	14	14	ER	8.63678e-13
INPP5E	0.115243	4	4	23	23	ER.A	-1
GFRA2	0.115331	6	6	48	48	QA	-1
NT5DC1	0.115334	2	2	15	15	ER	1.81421e-13
KIAA0556	0.115464	12	12	71	70	QA	-1
UBASH3A	0.115531	5	5	15	15	ER	2.01505e-13
FBXO9	0.115838	1	1	2	2	ER	0.00669586
GDAP1	0.115848	5	5	64	64	QA	-1
MFN1	0.115861	2	2	7	7	ER	3.68319e-07
DDHD2	0.115891	4	4	58	57	QA	-1
IFNA5	0.115908	3	3	83	81	QA	-1
MCM10	0.116062	2	2	4	4	ER	5.70422e-05
HADHA	0.116072	3	3	38	38	ER.A	-1
HARS2	0.116105	4	4	4	4	ER	0.00191718
KIAA1841	0.11613	3	3	28	28	ER.A	-1
CELA3B	0.116194	1	1	27	27	ER.A	-1
FAM105A	0.116266	4	4	12	12	ER	3.06837e-12
CHAC1	0.116275	2	2	2	2	ER	0.00348625
MADD	0.116364	2	2	4	4	ER	0.000517859
ZSWIM4	0.116371	5	5	13	13	ER	4.37151e-14
NFAT5	0.116391	5	5	18	18	ER	2.07396e-16
ASCC1	0.116501	4	4	18	18	ER	1.39979e-17
CDK12	0.116646	6	6	20	20	ER	2.76076e-19
PCED1A	0.116715	2	2	10	10	ER	8.7134e-11
BAZ2B	0.116718	10	10	88	87	QA	-1
PPP1R13B	0.116726	5	5	6	6	ER	1.12776e-05
ALDH3B2	0.116732	7	7	109	109	QA	-1
FRMPD1	0.116794	17	16	159	155	QA	-1
KCNC3	0.11687	3	3	5	5	ER	1.32671e-05
FANK1	0.116903	6	6	42	34	QA	-1
LIN54	0.117096	2	2	15	15	ER	7.98116e-13
UPB1	0.117129	8	8	46	45	QA	-1
GOSR2	0.117207	3	2	17	17	ER	7.18007e-17
PRKCI	0.117467	4	4	36	36	ER.A	-1
CDKL1	0.117498	3	3	6	6	ER	2.73774e-06
OR51E2	0.11764	3	3	12	12	ER	3.02915e-11
G6PC3	0.117774	1	1	1	1	ER	0.117774
HIST1H2AK	0.117774	1	1	1	1	ER	0.117774
LYRM1	0.117774	1	1	1	1	ER	0.117774
SIX3	0.117774	1	1	1	1	ER	0.117774
TIPARP	0.117774	1	1	1	1	ER	0.117774
SYK	0.117859	2	2	11	11	ER	1.82615e-11
ZNF668	0.117869	3	3	5	5	ER	3.3275e-05
SETD3	0.118036	3	3	12	12	ER	4.96998e-11
RBM15	0.11809	3	3	71	71	QA	-1
IGFL1	0.118172	1	1	2	2	ER	0.00696846
DUSP22	0.118256	4	4	27	27	ER.A	-1
LRCH4	0.118264	8	8	40	40	ER.A	-1
SMOX	0.118291	2	2	2	2	ER	0.00368676
ADAMTSL1	0.118312	14	14	120	117	QA	-1
IRS1	0.118429	10	10	93	93	QA	-1
RHCG	0.11849	1	1	42	42	QA	-1
NT5DC2	0.118549	6	6	8	8	ER	9.34955e-09
YDJC	0.118569	2	2	44	44	QA	-1
IRAK2	0.118782	6	6	81	81	QA	-1
MFAP1	0.118827	3	3	9	9	ER	3.46742e-09
MAN2A1	0.118985	6	6	24	24	ER.A	-1
KRTAP10-2	0.119196	1	1	6	6	ER	3.11455e-06
GNA15	0.119202	1	1	16	16	ER	1.35807e-14
C7orf62	0.11937	5	5	16	16	ER	7.76375e-16
TPP2	0.119387	3	3	10	10	ER	4.39583e-09
SCO2	0.119388	2	2	4	4	ER	0.000125997
NUP107	0.119517	4	4	4	4	ER	3.26283e-05
ABCA3	0.119731	22	22	197	194	QA	-1
GATA4	0.119767	4	4	20	20	ER	4.9603e-18
GK5	0.119795	1	1	2	2	ER	0.00623122
BAP1	0.119806	1	1	2	2	ER	0.0071625
DNASE2	0.119813	4	4	5	5	ER	1.36289e-05
KIF20A	0.120038	7	7	56	55	QA	-1
SLC24A1	0.120041	1	1	19	19	ER	9.97578e-19
GLYCTK	0.12011	1	1	23	23	ER.A	-1
CDK5RAP3	0.120234	5	4	35	35	ER.A	-1
MTMR3	0.120281	7	7	9	9	ER	1.89982e-08
ZNF829	0.120452	4	4	22	21	ER.A	-1
NUBP2	0.121401	4	4	5	5	ER	6.29844e-06
OR10A7	0.121418	3	3	8	8	ER	1.08876e-09
ABLIM2	0.121432	6	6	15	15	ER	4.79423e-14
CASC5	0.121448	6	6	38	38	ER.A	-1
OR4C13	0.121455	1	1	1	1	ER	0.121455
ANGPT2	0.121486	4	4	33	33	ER.A	-1
C5orf30	0.121804	2	2	6	6	ER	2.58592e-05
MLNR	0.12183	2	2	15	15	ER	2.81876e-13
FEM1B	0.122035	2	2	37	37	ER.A	-1
PCDHGC3	0.122052	4	4	8	8	ER	6.0284e-09
ARSJ	0.122144	4	2	6	6	ER	8.44485e-07
ANKHD1	0.122166	11	11	46	46	QA	-1
TPP1	0.122225	4	4	26	26	ER.A	-1
EDAR	0.12238	3	3	4	4	ER	8.0819e-05
CPSF3L	0.122403	2	2	2	2	ER	0.0209143
PGPEP1	0.122423	4	4	8	8	ER	1.11732e-08
FUK	0.122428	10	10	80	80	QA	-1
RTP4	0.122607	1	1	30	30	ER.A	-1
P4HB	0.122657	2	2	30	30	ER.A	-1
FKBP5	0.122732	2	2	50	49	QA	-1
RNF6	0.122793	2	2	3	3	ER	0.0012572
EIF2B2	0.122815	4	4	10	10	ER	1.16805e-09
ARHGAP20	0.122863	10	10	74	74	QA	-1
C17orf104	0.122881	3	3	11	11	ER	5.00624e-12
FAM173A	0.122931	1	1	1	1	ER	0.122931
GUCA1B	0.122931	1	1	1	1	ER	0.122931
TMC5	0.12298	8	8	32	32	ER.A	-1
SPARC	0.12303	5	5	11	11	ER	2.90848e-11
ZNF708	0.123041	3	3	7	7	ER	2.5645e-06
RRP1B	0.123046	3	3	3	3	ER	0.000781219
LMTK2	0.123087	9	9	114	112	QA	-1
PYCR1	0.123111	2	2	47	47	QA	-1
NCKIPSD	0.123317	8	8	26	26	ER.A	-1
MB21D1	0.12338	1	1	1	1	ER	0.12338
TBCEL	0.12338	1	1	1	1	ER	0.12338
CNTNAP1	0.123643	3	3	7	7	ER	3.79146e-06
INTS4	0.12367	2	2	2	2	ER	0.00397868
MYH7	0.123934	13	13	19	19	ER	1.9302e-18
EPB41L3	0.123949	10	9	79	78	QA	-1
CHST14	0.124002	2	2	49	47	QA	-1
NT5C3B	0.124132	2	2	65	65	QA	-1
FAM71D	0.124231	3	3	35	35	ER.A	-1
TMEM206	0.12431	4	4	34	34	ER.A	-1
ZNF606	0.124353	3	3	20	20	ER	8.36e-20
TMCO5A	0.124552	3	3	44	44	QA	-1
SLC6A18	0.124719	9	9	42	42	QA	-1
THUMPD3	0.124844	3	3	16	16	ER	3.50585e-16
NADK2	0.124915	3	3	30	30	ER.A	-1
RRP9	0.124922	5	5	55	55	QA	-1
TUBGCP4	0.125021	9	9	56	56	QA	-1
RAMP1	0.125236	3	3	8	8	ER	2.98886e-08
ERGIC3	0.125291	2	2	2	2	ER	0.00387336
PAX7	0.125576	7	7	8	8	ER	4.17714e-08
C3orf79	0.125682	1	1	8	8	ER	4.5381e-09
MEF2D	0.125792	2	2	2	2	ER	0.0041043
MADCAM1	0.125845	2	2	2	2	ER	0.00414997
DPYD	0.125898	5	5	44	44	QA	-1
NDRG2	0.125926	4	4	25	25	ER.A	-1
SNAI1	0.126185	2	2	5	5	ER	2.9439e-06
HIF3A	0.12623	4	4	9	9	ER	7.23908e-09
OR11L1	0.126241	2	2	2	2	ER	0.00424801
EPHA4	0.126282	3	3	6	6	ER	3.67017e-06
FRY	0.12659	18	17	125	124	QA	-1
MIOS	0.126703	7	7	56	56	QA	-1
SYNGR2	0.127044	1	1	2	2	ER	0.00512673
PCOLCE2	0.127407	5	5	62	62	QA	-1
ALDH1A1	0.127422	2	2	64	64	QA	-1
PDZD8	0.127422	7	7	15	15	ER	1.20745e-14
SLC17A2	0.127484	5	5	22	22	ER.A	-1
CEP76	0.127503	2	2	3	3	ER	0.00249443
UPP2	0.127508	4	4	82	82	QA	-1
WDR81	0.12761	2	2	5	5	ER	2.69962e-05
GYPC	0.127632	1	1	4	4	ER	8.31224e-06
TMEM38B	0.127705	5	5	77	77	QA	-1
DIS3L	0.127807	5	5	42	42	QA	-1
ITIH5	0.127897	7	7	54	54	QA	-1
RANBP3	0.127908	5	5	30	30	ER.A	-1
KLHL22	0.127961	4	4	4	4	ER	6.30363e-05
RPUSD2	0.128007	4	4	27	27	ER.A	-1
TMEM156	0.12806	1	1	28	28	ER.A	-1
KLK1	0.12808	3	3	6	6	ER	3.94067e-07
TCHP	0.128086	5	5	33	32	ER.A	-1
CPT2	0.128148	9	9	83	59	QA	-1
ZMYM4	0.128176	9	9	40	39	ER.A	-1
PIGX	0.128208	2	2	6	6	ER	9.56623e-07
CDC6	0.128375	3	3	9	9	ER	8.68673e-09
CLIP4	0.128452	7	7	39	38	ER.A	-1
SP140L	0.128481	2	2	2	2	ER	0.00389505
USP43	0.128509	7	7	54	54	QA	-1
NEK4	0.128676	1	1	7	7	ER	1.27477e-07
OTUB2	0.128732	3	3	14	14	ER	4.90485e-13
RSBN1L	0.128733	5	5	21	21	ER.A	-1
TCIRG1	0.128935	7	7	55	55	QA	-1
GDF3	0.128971	1	1	7	7	ER	1.00931e-07
LRP11	0.128981	1	1	2	2	ER	0.00830191
C2orf42	0.12901	5	5	37	37	ER.A	-1
HIST1H2AB	0.129196	3	3	23	23	ER.A	-1
KRTAP4-4	0.12921	1	1	6	6	ER	2.42474e-06
EBPL	0.129265	1	1	2	2	ER	0.0083385
IL17RE	0.129289	4	4	51	51	QA	-1
TMEM169	0.129331	2	2	26	26	ER.A	-1
PARVB	0.12934	4	4	70	69	QA	-1
FBXO24	0.129568	7	7	67	67	QA	-1
SLC12A4	0.129651	11	11	24	24	ER.A	-1
PCDHA11	0.129664	3	3	5	5	ER	2.97164e-05
AP2B1	0.129798	1	1	1	1	ER	0.129798
HIST3H3	0.129877	4	4	33	33	ER.A	-1
ZNF660	0.130056	3	3	27	27	ER.A	-1
UNC13C	0.130115	17	17	127	126	QA	-1
EPHB3	0.130183	5	5	16	16	ER	1.44928e-15
C1orf101	0.130402	8	7	61	61	QA	-1
NEURL1	0.130494	2	2	2	2	ER	0.00438308
C1orf116	0.130728	4	4	30	30	ER.A	-1
CLDN3	0.130857	3	3	13	13	ER	1.83003e-10
POLDIP3	0.130859	4	4	11	11	ER	4.11251e-10
IRF9	0.130865	1	1	3	3	ER	0.000322145
EGR2	0.130913	3	3	25	25	ER.A	-1
PRTG	0.131141	8	8	34	34	ER.A	-1
SERINC3	0.131352	3	3	14	14	ER	3.60619e-13
SORBS3	0.131358	5	5	15	15	ER	3.81396e-15
ZNF513	0.131362	1	1	1	1	ER	0.131362
PDE8A	0.131497	5	5	6	6	ER	8.13695e-08
IL18RAP	0.131635	5	5	10	8	ER	5.3407e-09
LIPC	0.131683	4	4	35	35	ER.A	-1
PGK2	0.131702	2	2	2	2	ER	0.00463408
FIBP	0.132054	2	2	6	6	ER	1.77754e-07
RAB25	0.132086	2	2	2	2	ER	0.0327964
KRTAP5-2	0.13221	1	1	7	7	ER	1.75853e-07
SLC18A2	0.132314	4	4	27	26	ER.A	-1
CCDC47	0.132319	4	4	5	5	ER	4.34276e-06
CPLX1	0.132578	2	2	4	4	ER	0.000162878
NEUROD6	0.132819	2	2	20	20	ER	3.76472e-19
SAR1B	0.132844	2	2	2	2	ER	0.00434197
KBTBD12	0.132869	2	2	60	60	QA	-1
FAM149A	0.132997	8	8	47	46	QA	-1
CAPZA3	0.13311	3	3	7	7	ER	4.03638e-07
MGME1	0.133118	2	2	42	41	QA	-1
KIAA1614	0.133218	10	10	49	49	QA	-1
GAP43	0.133379	4	4	19	19	ER	1.13576e-17
QPCTL	0.133386	3	3	45	45	QA	-1
CCR5	0.133674	7	7	68	68	QA	-1
FBXO44	0.1338	5	4	15	15	ER	2.21401e-14
TSC22D4	0.133815	3	3	50	50	QA	-1
IL20	0.13387	1	1	30	29	ER.A	-1
RTN4	0.133891	4	4	50	50	QA	-1
SDK1	0.133909	21	20	147	146	QA	-1
ADAM32	0.134004	3	3	7	7	ER	5.21464e-06
SLC16A1	0.134114	5	5	9	9	ER	1.4055e-10
BUB3	0.134174	1	1	2	2	ER	0.00620854
GULP1	0.134225	3	3	10	10	ER	1.0501e-10
ARHGAP26	0.134327	2	2	10	10	ER	1.81305e-11
HIRA	0.134563	6	6	56	56	QA	-1
MTRF1	0.134662	3	3	21	21	ER.A	-1
CBS	0.134716	3	3	44	43	QA	-1
POU6F2	0.13479	4	4	29	29	ER.A	-1
KARS	0.134829	1	1	6	6	ER	2.86903e-06
TEX33	0.134882	2	2	3	3	ER	0.00170609
CD22	0.134956	3	3	39	38	ER.A	-1
GABBR1	0.135082	3	3	21	21	ER.A	-1
HSPA4L	0.135084	6	6	26	26	ER.A	-1
PLEK2	0.135161	2	2	8	8	ER	1.84418e-08
FEZ1	0.135364	3	3	7	7	ER	6.85412e-07
TREML1	0.135365	4	4	52	52	QA	-1
MYO9A	0.135553	15	14	131	130	QA	-1
TUBGCP6	0.13559	4	4	38	38	ER.A	-1
ATG16L1	0.135707	3	3	7	7	ER	5.26445e-07
SPATA31D1	0.135817	1	1	1	1	ER	0.135817
TRIM15	0.135826	3	3	55	54	QA	-1
APOA1	0.136433	2	2	4	4	ER	0.000169277
PMEL	0.13655	3	3	13	13	ER	2.96705e-12
KIAA0430	0.136894	9	9	63	63	QA	-1
CDH10	0.137217	3	3	11	11	ER	1.80784e-12
TMEM71	0.137286	2	2	3	3	ER	0.00191078
SPG21	0.137325	1	1	2	2	ER	0.00941114
TCL1A	0.137384	2	2	4	4	ER	6.70488e-05
IL36RN	0.137397	2	2	14	14	ER	2.10568e-13
ZNF207	0.13746	3	3	3	3	ER	0.000925173
DZIP1	0.137471	9	9	60	59	QA	-1
QARS	0.137632	2	2	4	4	ER	0.000618986
PSMD8	0.137839	1	1	46	46	QA	-1
LIPH	0.137972	1	1	30	30	ER.A	-1
NRXN1	0.138012	8	8	35	35	ER.A	-1
NCKAP5L	0.13805	7	7	60	60	QA	-1
SLC27A4	0.138084	3	3	14	14	ER	8.88911e-15
SMCO3	0.138184	1	1	1	1	ER	0.138184
CHPF	0.138198	7	7	23	23	ER.A	-1
CCR7	0.138236	2	2	2	2	ER	0.00484278
TMEM39B	0.138245	2	2	7	7	ER	1.11494e-08
HEXIM1	0.138266	2	2	4	4	ER	0.000110241
PLCH1	0.138304	12	12	44	44	QA	-1
ADAMTS15	0.138316	9	9	14	14	ER	3.78731e-12
RMDN1	0.138373	1	1	10	10	ER	1.38711e-09
DDX19B	0.13842	1	1	2	2	ER	0.00956186
AQP5	0.138585	3	3	7	7	ER	2.96879e-07
PNLIPRP3	0.138588	4	4	7	7	ER	7.93492e-08
GPAA1	0.138617	4	4	7	7	ER	2.30801e-06
REG3A	0.138628	3	3	4	4	ER	0.000203564
CNOT6	0.138657	2	2	46	46	QA	-1
UGDH	0.138739	2	2	7	7	ER	6.34749e-06
SMPD3	0.138903	10	10	41	41	QA	-1
TECRL	0.138936	3	3	10	10	ER	9.58033e-10
MAP1B	0.139006	15	15	90	90	QA	-1
NETO2	0.139027	7	7	40	40	ER.A	-1
FICD	0.139126	1	1	1	1	ER	0.139126
JUND	0.139227	1	1	3	3	ER	0.000291829
RAPGEF6	0.139279	11	11	56	56	QA	-1
SUN3	0.139345	1	1	18	18	ER	2.10281e-16
TRIM23	0.139402	3	3	9	5	ER	0.000229903
CAV1	0.13944	2	2	20	20	ER	2.47414e-19
PQLC2	0.139472	1	1	12	12	ER	1.28559e-12
SNX33	0.139473	6	6	106	105	QA	-1
CHI3L2	0.139632	1	1	8	8	ER	1.85079e-06
MYRIP	0.139763	4	4	67	67	QA	-1
CA3	0.139765	1	1	6	6	ER	1.88111e-06
CCDC53	0.140107	1	1	1	1	ER	0.140107
AGXT	0.14017	6	6	11	10	ER	5.022e-10
PIGQ	0.140201	4	4	9	9	ER	2.27103e-08
NCR2	0.14025	2	2	44	44	QA	-1
PSMD3	0.140419	6	6	38	38	ER.A	-1
PAX3	0.140422	2	2	2	2	ER	0.00523561
FABP1	0.140472	2	2	39	38	ER.A	-1
TBX19	0.140488	4	4	16	16	ER	2.97497e-14
ZNF552	0.140489	3	3	32	32	ER.A	-1
MLH1	0.140514	10	10	55	54	QA	-1
SPHKAP	0.140518	6	6	34	34	ER.A	-1
NOBOX	0.140636	1	1	6	6	ER	5.32722e-06
SLC26A5	0.140712	5	5	37	37	ER.A	-1
WFDC9	0.140897	1	1	27	27	ER.A	-1
FAN1	0.140954	9	9	83	82	QA	-1
CELF2	0.140959	3	3	5	5	ER	1.07823e-05
CEP95	0.141127	4	4	6	6	ER	3.70817e-05
BUB1	0.141272	1	1	1	1	ER	0.141272
SLC7A5	0.141312	5	5	6	6	ER	2.5539e-06
ZNF451	0.141483	5	5	35	35	ER.A	-1
KDM3B	0.141729	8	8	67	67	QA	-1
SEC23A	0.141753	4	4	4	4	ER	0.0009177
DNAJC27	0.141859	2	2	5	5	ER	6.74681e-06
SHPRH	0.142041	14	14	62	57	QA	-1
TSPYL5	0.142231	5	5	48	48	QA	-1
TNPO1	0.142544	1	1	1	1	ER	0.142544
C4orf21	0.142545	10	10	88	82	QA	-1
OSGEP	0.142599	3	3	12	12	ER	1.0635e-10
ERCC3	0.142606	7	7	104	104	QA	-1
PTH2R	0.14263	5	5	63	63	QA	-1
TNFRSF11B	0.142874	3	3	4	4	ER	0.000247941
PRICKLE4	0.142876	1	1	11	11	ER	4.65117e-11
ACADL	0.142895	2	2	2	2	ER	0.00527266
PHF21A	0.142929	2	2	26	26	ER.A	-1
CDYL2	0.143093	1	1	38	38	ER.A	-1
JAKMIP2	0.143278	3	3	16	16	ER	2.09057e-15
C6orf118	0.143306	3	3	57	57	QA	-1
CETP	0.143436	6	6	24	24	ER.A	-1
GYS1	0.14347	2	2	5	5	ER	5.78241e-06
CPNE5	0.143479	3	3	62	62	QA	-1
KANK2	0.143486	9	9	100	99	QA	-1
VASP	0.143519	3	3	12	12	ER	1.86006e-10
TNKS	0.143607	7	7	112	112	QA	-1
YTHDF1	0.143638	4	4	4	4	ER	1.76197e-05
SEPP1	0.143675	6	6	74	71	QA	-1
SLC2A5	0.14368	4	4	7	7	ER	4.5278e-07
C2CD5	0.143798	2	2	4	4	ER	0.000724911
A3GALT2	0.143836	1	1	2	2	ER	0.00817051
LTBP3	0.14399	4	4	50	50	QA	-1
PGD	0.144229	4	4	48	46	QA	-1
FEM1C	0.14444	3	3	3	3	ER	0.000770114
FPGS	0.144721	3	3	5	5	ER	7.9672e-06
CDK5RAP2	0.14478	3	3	34	34	ER.A	-1
GMPR	0.144931	5	5	73	72	QA	-1
RGS3	0.145002	16	16	175	170	QA	-1
ITGAE	0.145024	11	11	15	15	ER	2.01024e-13
IRGQ	0.145081	1	1	2	2	ER	0.00849393
PGBD1	0.145091	6	6	75	73	QA	-1
EPHB4	0.145109	5	5	58	58	QA	-1
DRD2	0.145371	3	3	18	18	ER	2.10202e-18
RIPK4	0.14543	1	1	10	10	ER	3.47743e-09
KSR2	0.145435	5	5	15	15	ER	5.85862e-15
KRT28	0.145471	4	4	19	19	ER	8.64278e-18
LAMA4	0.145478	8	8	24	24	ER.A	-1
CCNB1IP1	0.145482	1	1	1	1	ER	0.145482
ANO6	0.145521	2	2	5	5	ER	2.9086e-05
CLDN8	0.14556	1	1	3	3	ER	0.000429421
TDRKH	0.145607	4	4	8	8	ER	3.32081e-09
MRGPRX2	0.145736	3	3	23	23	ER.A	-1
SULT2B1	0.145794	1	1	3	3	ER	0.000385658
DPEP1	0.145852	4	4	20	20	ER	4.61308e-19
COA3	0.145858	1	1	6	6	ER	2.89942e-06
OR13J1	0.146095	4	4	70	70	QA	-1
PEPD	0.146095	4	4	35	35	ER.A	-1
STRN4	0.146164	7	7	12	12	ER	7.57861e-13
FDPS	0.146166	1	1	11	11	ER	1.66336e-10
IFNB1	0.146186	1	1	2	2	ER	0.00782844
GPR161	0.14632	5	5	5	5	ER	4.51592e-05
C16orf71	0.146338	3	3	5	5	ER	9.47414e-06
ST6GALNAC5	0.146427	1	1	6	6	ER	2.13312e-06
CDCA2	0.146479	8	8	110	109	QA	-1
HGSNAT	0.146504	3	2	16	16	ER	6.60457e-15
COL16A1	0.146529	9	9	99	98	QA	-1
PCDHB15	0.146545	6	6	64	42	QA	-1
GPC6	0.146722	3	3	3	3	ER	0.0010199
ZBTB43	0.146723	2	2	34	34	ER.A	-1
CLIP2	0.146773	5	5	5	5	ER	2.8068e-06
VENTX	0.146805	2	2	8	8	ER	5.99116e-07
SLC39A1	0.146849	3	2	16	16	ER	2.16751e-15
PTPN9	0.146935	1	1	2	2	ER	0.0107748
UBE4B	0.147012	6	6	19	19	ER	2.61514e-18
ZBED4	0.14709	5	5	61	61	QA	-1
CYP27A1	0.147091	5	5	19	19	ER	2.25706e-17
FTSJ2	0.147117	2	2	12	12	ER	6.4107e-12
CST4	0.147228	1	1	42	42	QA	-1
CALB2	0.147257	2	2	21	21	ER.A	-1
ZNF565	0.147271	3	3	4	4	ER	0.000144858
ZNF19	0.147404	2	2	16	16	ER	1.8148e-15
OSBP2	0.147424	3	3	19	19	ER	2.1509e-19
ASIC2	0.147434	3	3	39	39	ER.A	-1
TMPRSS3	0.147512	6	5	37	37	ER.A	-1
ARHGEF19	0.148175	3	3	7	7	ER	4.38613e-08
PPP3R2	0.148223	1	1	12	12	ER	5.21379e-12
OR4N2	0.148272	3	3	31	31	ER.A	-1
C5orf20	0.148306	1	1	2	2	ER	0.00948135
FNBP1	0.148319	1	1	3	3	ER	0.000470399
KIF13B	0.14833	8	8	55	54	QA	-1
CDK13	0.148382	7	7	77	76	QA	-1
AK7	0.148399	7	7	21	21	ER.A	-1
NSRP1	0.14846	2	2	40	40	ER.A	-1
SF3A3	0.148465	1	1	3	3	ER	0.00037673
DOHH	0.148477	1	1	1	1	ER	0.148477
GZF1	0.148477	1	1	1	1	ER	0.148477
MRGPRF	0.148477	1	1	1	1	ER	0.148477
WBP4	0.148477	1	1	1	1	ER	0.148477
TMEM108	0.148628	6	6	15	15	ER	1.48662e-13
LGALS9	0.148699	1	1	27	25	ER.A	-1
DHX38	0.148814	8	8	44	44	QA	-1
CWF19L1	0.148824	3	3	41	41	QA	-1
ITPA	0.148866	3	3	5	3	ER	0.00294911
TUB	0.149031	7	6	47	46	QA	-1
GNL2	0.149033	7	7	32	32	ER.A	-1
YRDC	0.149069	1	1	11	11	ER	1.97939e-10
TYMP	0.149301	5	4	45	45	QA	-1
SLC5A7	0.149365	3	3	7	7	ER	2.73459e-07
HIPK4	0.1494	5	5	50	50	QA	-1
CREB5	0.149447	2	2	4	4	ER	9.20225e-05
KIAA0895	0.14953	4	4	61	60	QA	-1
GRIK1	0.149582	6	6	26	26	ER.A	-1
SOS1	0.149618	3	3	4	4	ER	0.000255176
ZFP69B	0.149647	3	3	48	48	QA	-1
RFX5	0.149731	3	3	3	3	ER	0.00135419
CUL9	0.149739	10	10	55	49	QA	-1
PCSK1	0.149852	3	3	3	3	ER	0.000570186
GATAD2B	0.149852	1	1	12	12	ER	5.52084e-12
IFT43	0.150042	2	2	5	5	ER	4.72614e-05
INPP4A	0.150175	6	6	27	27	ER.A	-1
KIAA0247	0.150666	2	2	19	19	ER	6.51827e-20
TBP	0.150679	1	1	12	12	ER	7.31533e-12
SSBP1	0.150712	2	2	10	10	ER	9.56585e-10
CCDC3	0.150718	1	1	2	2	ER	0.0099741
GPIHBP1	0.150731	1	1	55	55	QA	-1
GALNT3	0.150802	1	1	1	1	ER	0.150802
XYLT1	0.150968	4	4	63	63	QA	-1
VPS8	0.150994	6	6	54	54	QA	-1
GPR110	0.151094	8	8	93	92	QA	-1
EPB41L5	0.151107	6	6	49	49	QA	-1
CEBPD	0.151123	3	3	3	3	ER	0.00123123
C2orf50	0.151275	1	1	5	5	ER	0.00010908
IL26	0.151284	1	1	6	6	ER	6.69687e-06
HOXA9	0.15163	2	2	37	37	ER.A	-1
PCYOX1L	0.151786	3	3	4	4	ER	2.9553e-05
MCM3	0.151795	5	5	72	72	QA	-1
DUSP2	0.152049	2	2	4	4	ER	0.000652291
ICOS	0.152179	1	1	3	3	ER	0.000428394
LYZL6	0.152331	3	2	2	2	ER	0.0366735
EXD2	0.152353	6	5	32	32	ER.A	-1
CPXM2	0.152386	6	6	28	27	ER.A	-1
CRNN	0.152772	4	4	24	24	ER.A	-1
SPATS2L	0.152808	2	2	2	2	ER	0.00631318
CARS2	0.152813	6	6	20	20	ER	3.12819e-18
RLN3	0.152875	2	2	9	9	ER	3.51268e-08
POLR2G	0.152902	1	1	3	3	ER	0.000307092
FAM91A1	0.152915	3	3	16	16	ER	7.49405e-16
PCDHA10	0.153321	5	5	41	37	QA	-1
ZNF750	0.153387	6	6	19	19	ER	4.53345e-17
PBX4	0.153392	3	3	24	24	ER.A	-1
BMP8A	0.153552	2	2	31	31	ER.A	-1
FMO4	0.153612	7	7	57	49	QA	-1
MEIS3	0.153796	1	1	53	53	QA	-1
HS6ST3	0.153872	4	4	29	29	ER.A	-1
LYPD3	0.153898	4	4	46	46	QA	-1
SLC15A4	0.154113	2	2	17	17	ER	5.33493e-17
NANS	0.154183	5	5	38	38	ER.A	-1
SNRNP48	0.154188	2	2	20	20	ER	2.10423e-18
ACTBL2	0.154425	5	5	72	71	QA	-1
ISL2	0.154482	1	1	12	12	ER	1.65765e-11
KMT2E	0.154498	16	16	65	63	QA	-1
NAA16	0.154503	2	2	2	2	ER	0.00634616
PNPLA5	0.154762	3	3	34	33	ER.A	-1
SSH2	0.154853	7	6	19	19	ER	6.2467e-17
FBN2	0.154931	26	24	254	249	QA	-1
SZT2	0.154951	13	13	78	65	QA	-1
LUZP2	0.155011	1	1	25	24	ER.A	-1
PTPRA	0.155036	8	8	40	40	ER.A	-1
GLIPR1L1	0.155284	1	1	2	2	ER	0.00833002
NID2	0.155303	15	14	52	51	QA	-1
EVX1	0.155398	2	2	10	10	ER	5.15337e-11
C4orf29	0.155485	4	4	32	32	ER.A	-1
NDUFA7	0.155486	2	2	2	2	ER	0.00514564
SUCLG1	0.155719	4	4	90	90	QA	-1
GSTA3	0.155805	4	4	55	55	QA	-1
TAGLN	0.155827	2	2	2	2	ER	0.00625153
PPM1F	0.155976	2	2	2	2	ER	0.00634463
RBFOX1	0.156089	6	6	58	58	QA	-1
FAM186B	0.15635	6	6	24	24	ER.A	-1
ZSCAN21	0.156612	7	7	17	17	ER	3.39724e-17
DCAF13	0.15669	7	7	31	31	ER.A	-1
CAMK2B	0.156866	2	2	2	2	ER	0.00621626
2022-09-04	0.156881	2	2	8	8	ER	5.3101e-08
SLC8B1	0.156956	6	6	63	62	QA	-1
OR7C2	0.156977	2	2	6	6	ER	2.95834e-06
HSPBP1	0.15701	3	3	10	10	ER	8.46391e-10
LEKR1	0.157195	1	1	2	2	ER	0.0123327
PRAM1	0.157199	1	1	12	12	ER	2.31704e-11
NOA1	0.157249	7	7	87	86	QA	-1
SYNJ2	0.157287	10	10	83	82	QA	-1
ARHGAP22	0.157386	2	2	4	4	ER	0.00111995
RUNDC1	0.157405	7	7	43	43	QA	-1
CYP1B1	0.157598	4	4	6	6	ER	2.78877e-06
RGS1	0.157693	2	2	13	13	ER	5.6309e-13
SAG	0.157712	1	1	2	2	ER	0.00990144
INTS2	0.157714	1	1	38	38	ER.A	-1
GXYLT2	0.157759	5	4	11	11	ER	1.54738e-12
GPR78	0.157959	3	3	6	6	ER	4.41841e-06
RABEP1	0.15809	5	5	6	6	ER	1.58132e-06
CEP63	0.158305	6	6	33	32	ER.A	-1
SLC38A2	0.158561	3	3	53	53	QA	-1
CCR8	0.158596	2	2	10	10	ER	1.85057e-09
ZNF277	0.158641	5	5	32	32	ER.A	-1
PACSIN1	0.158666	3	3	64	62	QA	-1
LAMC2	0.158716	6	6	19	19	ER	4.714e-18
TRIP6	0.1588	2	2	3	3	ER	0.00293056
NLRP6	0.158836	10	10	35	34	ER.A	-1
UGT1A9	0.158968	2	2	2	2	ER	0.00682658
TBC1D8	0.158977	10	10	18	18	ER	2.44241e-18
OS9	0.159028	5	5	38	38	ER.A	-1
DUSP23	0.15912	2	1	14	14	ER	3.86748e-14
LRRC10	0.159287	2	2	10	10	ER	1.31049e-09
SGPP2	0.159325	6	6	76	76	QA	-1
CASQ2	0.159326	5	5	103	103	QA	-1
TTC17	0.159356	5	5	17	17	ER	8.7115e-16
TCEB3B	0.159385	5	5	49	49	QA	-1
PIP	0.159596	2	2	42	41	QA	-1
PLXDC2	0.159667	4	4	8	8	ER	3.12335e-07
ARHGEF39	0.159821	1	1	14	14	ER	2.34276e-14
SH3PXD2B	0.159853	6	6	49	49	QA	-1
CBX4	0.159939	2	2	5	5	ER	2.34255e-05
IL3	0.160381	2	2	14	14	ER	1.74982e-14
CNIH4	0.16071	3	3	67	67	QA	-1
GTSF1L	0.160785	3	3	57	57	QA	-1
SLIRP	0.160815	2	2	46	45	QA	-1
RBMS1	0.160945	2	2	2	2	ER	0.0070109
ZBTB10	0.161212	3	3	28	28	ER.A	-1
RAB21	0.161274	1	1	20	20	ER	3.27107e-18
CHN1	0.161411	1	1	3	3	ER	0.000449329
SLAIN2	0.161432	1	1	3	3	ER	0.000552663
KIF18A	0.161468	5	5	16	16	ER	7.39616e-16
RAF1	0.161497	3	3	27	14	ER.A	-1
CHRDL2	0.161577	3	3	5	5	ER	1.78889e-05
NCAPD3	0.16191	15	15	176	171	QA	-1
MICALL1	0.161949	5	5	12	12	ER	8.71041e-10
TXK	0.162115	2	2	13	13	ER	5.72292e-13
HEATR4	0.162295	16	15	102	96	QA	-1
MOS	0.162307	2	2	12	12	ER	4.17146e-12
ZMPSTE24	0.162755	3	3	7	7	ER	1.78737e-07
CDH8	0.162993	9	9	23	23	ER.A	-1
ABL1	0.163148	9	9	24	24	ER.A	-1
ARFGAP2	0.163267	3	3	88	88	QA	-1
PLXNA1	0.163274	14	14	45	43	QA	-1
FOXI1	0.163726	2	2	4	4	ER	0.00011327
C1QBP	0.163793	1	1	3	3	ER	0.000469701
CDC42BPB	0.163852	11	11	43	43	QA	-1
SESTD1	0.163879	2	2	5	5	ER	6.44063e-06
USP4	0.164109	7	7	71	70	QA	-1
ZNF80	0.164146	1	1	15	15	ER	1.8623e-15
ZNF665	0.164452	3	3	31	31	ER.A	-1
ECT2	0.164461	2	2	33	33	ER.A	-1
LEPROT	0.164462	2	2	2	2	ER	0.00724339
MAML3	0.164479	8	8	112	111	QA	-1
OPALIN	0.164669	1	1	22	22	ER.A	-1
DUOX1	0.164721	18	18	143	140	QA	-1
CEP70	0.164776	2	2	12	12	ER	1.73542e-11
LSG1	0.164782	8	8	129	129	QA	-1
TRMT1	0.164835	3	3	10	10	ER	1.0523e-10
FAM124B	0.164896	1	1	1	1	ER	0.164896
IGFBPL1	0.164896	1	1	1	1	ER	0.164896
ADA	0.165096	1	1	1	1	ER	0.165096
SIPA1L2	0.165126	9	7	63	40	QA	-1
GUF1	0.165243	10	10	148	146	QA	-1
FAM81A	0.165272	2	2	2	2	ER	0.00730316
TARS	0.165298	6	6	93	92	QA	-1
C10orf35	0.16533	2	2	27	27	ER.A	-1
ZBTB34	0.165336	4	4	42	41	QA	-1
[truncated: 10,575 more rows]

## Sheet: Supplementary Table 4
Supplementary Table 4. Association statistics for high impact rare variants on Ashkenazi Jewish IBD cohort (Variants with P < 0.05 are displayed)
Chr	Position (Hg19)	SNP(chr:posi:ref:alt)	Gene	Rs ID	Minor allele	TEST	NMISS	OR [95%CI]	P Value	Missing in Cases	Miss in Controls	Differential missing P value	VQSR dataset1	VQSLOD 1	VQSR dataset2	VQSLOD 2	Hardy P value
6	33648145	1:1396197:G:A	ATAD3C	rs201260974	A	ADD	4449	3.225 [3.137 - 3.315]	0.007767	0	0.001103	0.2865	PASS	3.16	PASS	3.49	1
16	50745656	1:1559292:C:T	MIB2	rs201686564	T	ADD	4436	0.4418 [0.4305 - 0.4535]	0.04917	0.0005767	0.005517	0.007846	PASS	3.22	PASS	4.15	1
16	87436663	1:2441500:C:A	PANK4	rs375430738	A	ADD	4440	2.836 [2.745 - 2.931]	0.0465	0	0.004413	0.004847	PASS	4.27	PASS	3.78	1
11	71238449	1:3672066:C:T	CCDC27	rs199649998	T	ADD	4450	3.432 [3.303 - 3.566]	0.04378	0.001153	0	0.1516	PASS	4.76	PASS	3.45	1
9	80537095	1:4834519:T:C	AJAP1	rs772423257	C	ADD	4453	6.862 [6.53 - 7.21]	0.01481	0	0	1	PASS	4.77	PASS	4.82	1
12	40734202	1:6688740:G:A	THAP3	rs140604454	A	ADD	4433	3.008 [2.927 - 3.091]	0.01132	0	0.006988	0.0001498	PASS	5.84	PASS	6.06	1
15	40914884	1:7887454:A:G	PER3	rs146636069	G	ADD	4453	3.161 [3.051 - 3.275]	0.04145	0	0	1	PASS	1.96	PASS	1.82	1
10	127414334	1:10460609:G:C	PGD	rs147995269	C	ADD	4444	10.23 [9.559 - 10.96]	0.03273	0	0.002942	0.02636	PASS	0.985	PASS	-0.556	1
6	47254244	1:15905400:C:T	AGMAT	rs200508005	T	ADD	4451	0.2448 [0.2366 - 0.2534]	0.01034	0	0.0003678	1	PASS	4.09	PASS	6.38	1
19	10395877	1:16073454:C:T	TMEM82	rs150205982	T	ADD	4448	2.148 [2.103 - 2.194]	0.02326	0.001153	0.0007356	0.6453	PASS	3.13	PASS	2.87	0.08024
12	55688939	1:16380180:A:C	CLCNKB	rs145798229	C	ADD	4451	0.4869 [0.476 - 0.4981]	0.04669	0	0.0003678	1	PASS	0.168	PASS	-0.7729	1
19	1109292	1:16382989:G:C	CLCNKB	rs375288190	C	ADD	4451	0.3082 [0.2974 - 0.3194]	0.03941	0	0.0003678	1	PASS	1.22	PASS	1.16	1
15	42853561	1:19493697:C:T	UBR4	rs150292860	T	ADD	4453	0.2993 [0.2889 - 0.31]	0.03199	0	0	1	PASS	4.95	PASS	5.43	1
1	40704120	1:20224085:A:G	OTUD3	rs200380749	G	ADD	4453	1.771 [1.739 - 1.803]	0.04759	0	0	1	PASS	6.41	PASS	5.93	0.1341
2	170938229	1:20915716:C:A	CDA	rs772193720	A	ADD	4453	11.11 [10.38 - 11.89]	0.02605	0	0	1	PASS	2.8	PASS	3.31	1
20	23666587	1:21050719:C:T	SH2D5	rs41265079	T	ADD	4449	2.169 [2.137 - 2.201]	0.001032	0	0.001103	0.2865	PASS	6.15	PASS	5.35	0.2885
12	55820372	1:22310239:G:A	CELA3B	rs141568613	A	ADD	4451	0.4119 [0.4007 - 0.4235]	0.04421	0.0005767	0	0.3894	PASS	0.273	PASS	-0.5362	1
1	44438171	1:24082352:A:G	TCEB3	rs369258695	G	ADD	4442	2.631 [2.566 - 2.698]	0.01616	0	0.003678	0.00848	PASS	2.14	PASS	2.06	1
19	58640281	1:26520354:T:C	CATSPER4	rs151280406	C	ADD	4453	2.337 [2.276 - 2.399]	0.04448	0	0	1	PASS	4.87	PASS	4.39	1
14	77297641	1:35369951:G:A	DLGAP3	rs146411302	A	ADD	4450	3.606 [3.491 - 3.724]	0.01269	0	0.0007356	0.5244	PASS	3.64	PASS	4.39	1
2	160599672	1:36552859:C:T	TEKT2	rs767119375	T	ADD	4453	5.847 [5.545 - 6.164]	0.0363	0	0	1	PASS	3.53	PASS	3.27	1
6	4069739	1:40704120:A:T	RLF	rs201602451	T	ADD	4450	4 [3.901 - 4.1]	0.0004672	0	0.0007356	0.5244	PASS	6.01	PASS	4.65	1
3	108072387	1:40874411:G:A	SMAP2	rs141827976	A	ADD	4446	0.5887 [0.5801 - 0.5974]	0.02445	0.002307	0.0007356	0.2164	PASS	4.1	PASS	4.71	1
3	64526863	1:43647429:C:T	WDR65	rs143229697	T	ADD	4451	5.101 [4.891 - 5.321]	0.01524	0	0.0003678	1	PASS	2.53	PASS	4.3	1
6	146870636	1:43895715:C:T	SZT2	rs140004653	T	ADD	4453	0.4161 [0.4055 - 0.4269]	0.03187	0	0	1	PASS	4.29	PASS	4.33	1
8	23306400	1:44438171:G:A	DPH2	rs145817429	A	ADD	4453	3.24 [3.169 - 3.313]	0.0008738	0	0	1	PASS	4.05	PASS	4.04	1
16	3487104	1:45806798:G:A	TOE1	rs140393352	A	ADD	4453	18.17 [16.97 - 19.46]	0.007916	0	0	1	PASS	5.96	PASS	5.74	1
8	23225606	1:46743923:G:A	RAD54L	rs28910278	A	ADD	4448	4.346 [4.212 - 4.483]	0.003101	0	0.001471	0.1618	PASS	7.33	PASS	7.5	1
1	109795123	1:47024318:G:A	MKNK1	rs200209678	A	ADD	4449	0.1661 [0.1583 - 0.1742]	0.01828	0.0005767	0.0007356	1	PASS	1.59	PASS	1.76	1
2	101097598	1:52499099:C:T	KTI12	rs144575218	T	ADD	4430	3.02 [2.932 - 3.112]	0.02015	0.0005767	0.007723	0.0005668	PASS	6.3	PASS	6.49	1
4	141458699	1:55075209:A:G	FAM151A	rs146657009	G	ADD	4450	0.4702 [0.4621 - 0.4784]	0.006229	0	0.0007356	0.5244	PASS	3.19	PASS	3.6	1
17	26925964	1:57209853:C:G	C1orf168	rs140047407	G	ADD	4453	5.57 [5.332 - 5.818]	0.01337	0	0	1	PASS	2.71	PASS	4.93	1
9	72914992	1:59812068:G:A	FGGY	rs372475252	A	ADD	4437	6.416 [6.085 - 6.766]	0.02794	0.00519	0.002207	0.1132	PASS	1.52	PASS	2.62	1
3	33194431	1:64608090:C:T	ROR1	rs200586005	T	ADD	4446	9.944 [9.265 - 10.67]	0.04167	0.0005767	0.001839	0.4147	PASS	1.94	PASS	1.81	1
17	26938471	1:67450416:G:A	MIER1	rs200742966	A	ADD	4451	4.077 [3.949 - 4.211]	0.006068	0	0.0003678	1	PASS	2.17	PASS	5.32	1
8	27358496	1:77987594:G:A	AK5	rs2803140	A	ADD	4432	2.297 [2.246 - 2.35]	0.02138	0.0005767	0.006988	0.0009122	PASS	7.46	PASS	6.66	0.0546
7	92765077	1:84417879:G:C	TTLL7	rs149508045	C	ADD	4451	7.623 [7.25 - 8.014]	0.01099	0	0.0003678	1	PASS	2.34	PASS	3.31	1
7	138417790	1:85462527:TG:T	MCOLN2	rs748190234	T	ADD	4453	6.575 [6.309 - 6.852]	0.004211	0	0	1	PASS	5.37	PASS	3.55	1
2	121554984	1:89835209:G:A	GBP6	rs75966734	A	ADD	4449	5.721 [5.478 - 5.974]	0.01161	0	0.001103	0.2865	PASS	5.42	PASS	5.49	1
1	236389606	1:93029245:T:C	EVI5	rs61735639	C	ADD	4449	0.4488 [0.4405 - 0.4572]	0.006894	0.0005767	0.0007356	1	PASS	3.25	PASS	3.51	1
1	84417879	1:100206478:C:A	FRRS1	rs143957192	A	ADD	4451	0.4114 [0.4019 - 0.4212]	0.01735	0	0.0003678	1	PASS	6.67	PASS	6.69	1
11	130297559	1:109793077:C:A	CELSR2	rs62623708	A	ADD	4449	10.5 [9.772 - 11.29]	0.04059	0	0.001103	0.2865	PASS	6.48	PASS	7.07	1
4	7435258	1:109795123:G:A	CELSR2	rs376119081	A	ADD	4453	0.1101 [0.1051 - 0.1153]	0.002897	0	0	1	PASS	4.82	PASS	6.4	1
18	48252498	1:111742274:C:T	DENND2D	rs201442513	T	ADD	4445	4.296 [4.111 - 4.489]	0.03739	0.0005767	0.002207	0.2589	PASS	1.45	PASS	1.52	1
11	57958038	1:113197201:G:A	CAPZA1	rs201525157	A	ADD	4453	0.3718 [0.3625 - 0.3813]	0.01437	0	0	1	PASS	3.71	PASS	2.44	1
20	44528279	1:117146542:C:T	IGSF3	rs150918555	T	ADD	4450	0.4155 [0.4076 - 0.4236]	0.004353	0	0.0007356	0.5244	PASS	1.5	PASS	-0.5801	1
11	47188427	1:149871811:C:T	BOLA1	rs147583028	T	ADD	4441	0.6535 [0.6447 - 0.6624]	0.04852	0	0.004046	0.00911	PASS	5.89	PASS	6.33	1
1	85462527	1:151006406:C:G	PRUNE	rs72706548	G	ADD	4453	0.4689 [0.4585 - 0.4795]	0.03398	0	0	1	PASS	3.28	PASS	4.03	1
13	42748189	1:153998176:C:T	NUP210L	rs201483933	T	ADD	4450	0.5358 [0.5256 - 0.5462]	0.04128	0.0005767	0.0003678	1	PASS	4.12	PASS	3.58	1
4	80327982	1:155167949:C:G	THBS3	rs748335230	G	ADD	4453	0.206 [0.1962 - 0.2164]	0.04331	0	0	1	PASS	4.13	PASS	3.78	1
10	64573941	1:155240609:G:A	CLK2	rs200641226	A	ADD	4447	0.3991 [0.3884 - 0.4102]	0.03502	0.00173	0.0007356	0.384	PASS	1.34	PASS	2.81	1
9	94487056	1:156108511:G:A	LMNA	rs368386019	A	ADD	4450	0.368 [0.3565 - 0.3799]	0.04816	0.0005767	0.0003678	1	PASS	4.36	PASS	6.24	1
2	174094448	1:156144971:G:A	SEMA4A	rs2075164	A	ADD	4443	0.3242 [0.3129 - 0.3358]	0.0456	0	0.00331	0.01482	PASS	5.45	PASS	6.87	1
6	33263971	1:156702216:G:A	RRNAD1	rs118116867	A	ADD	4446	9.773 [9.112 - 10.48]	0.04138	0.00346	0	0.003468	PASS	6.53	PASS	6.06	1
9	140622895	1:156907096:A:G	ARHGEF11	rs148727257	G	ADD	4446	0.5817 [0.5723 - 0.5912]	0.03699	0	0.002207	0.0879	PASS	4.71	PASS	3.5	0.3076
10	101157438	1:158390397:G:A	OR10K2	rs375373551	A	ADD	4450	3.462 [3.334 - 3.595]	0.03874	0.0005767	0.0003678	1	PASS	0.989	PASS	1.33	1
11	103797657	1:159505238:G:C	OR10J5	rs768359409	C	ADD	4453	8.048 [7.651 - 8.465]	0.009732	0	0	1	PASS	0.965	PASS	4.8	1
3	146177660	1:159752046:A:T	DUSP23	rs11544443	T	ADD	4453	0.5743 [0.5648 - 0.5839]	0.03599	0	0	1	PASS	4.28	PASS	6.36	0.2758
8	623604	1:160136352:G:A	ATP1A4	rs367924298	A	ADD	4453	0.09928 [0.09262 - 0.1064]	0.03704	0	0	1	PASS	1.29	PASS	-0.4088	1
4	952210	1:161681124:G:C	FCRLA	rs112766190	C	ADD	4451	2.072 [2.029 - 2.117]	0.03024	0	0.0003678	1	PASS	5.09	PASS	5.92	1
1	100206478	1:161953691:C:T	OLFML2B	rs370824607	T	ADD	4453	6.569 [6.239 - 6.916]	0.02201	0	0	1	PASS	5.79	PASS	5.21	1
11	62763248	1:166963277:G:A	MAEL	rs199624416	A	ADD	4448	1.971 [1.93 - 2.013]	0.04233	0.001153	0.0007356	0.6453	PASS	2.18	PASS	3.02	1
1	22927568	1:169761884:C:T	METTL18	rs35984232	T	ADD	4449	1.497 [1.48 - 1.515]	0.02828	0	0.001103	0.2865	PASS	3.8	PASS	5.93	0.6156
1	6688740	1:171301882:T:A	FMO4	rs61747501	A	ADD	4451	1.796 [1.763 - 1.829]	0.04454	0	0.0003678	1	PASS	4.94	PASS	6.22	1
2	118578770	1:171492641:C:G	PRRC2C	rs36013361	G	ADD	4442	1.645 [1.621 - 1.669]	0.03217	0.00173	0.002574	0.7495	PASS	3.26	PASS	4.12	1
11	59573957	1:173823011:C:A	DARS2	rs149660059	A	ADD	4453	3.146 [3.066 - 3.228]	0.00522	0	0	1	PASS	3.4	PASS	4.27	1
21	44480591	1:186301436:C:T	TPR	rs115482159	T	ADD	4448	3.039 [2.935 - 3.147]	0.04618	0.001153	0.0007356	0.6453	PASS	6.76	PASS	6.05	1
16	50746086	1:186324810:A:G	TPR	rs145363119	G	ADD	4450	0.4992 [0.4898 - 0.5088]	0.02141	0.001153	0	0.1516	PASS	7.01	PASS	6.98	0.1926
1	173823011	1:197297642:G:T	CRB1	rs140428156	T	ADD	4451	0.5272 [0.5187 - 0.536]	0.01447	0	0.0003678	1	PASS	6.18	PASS	6.29	1
16	53526377	1:200583514:C:T	KIF14	rs201168689	T	ADD	4432	3.479 [3.358 - 3.605]	0.02777	0.009804	0.001103	3.028e-05	PASS	0.92	PASS	1.69	1
7	51098545	1:201352509:A:C	LAD1	rs200504362	C	ADD	4449	2.423 [2.356 - 2.491]	0.04658	0.001153	0.0003678	0.5643	PASS	5.3	PASS	5.25	1
2	238461049	1:202097319:G:A	GPR37L1	rs114687119	A	ADD	4451	0.5873 [0.5776 - 0.5971]	0.04437	0	0.0003678	1	PASS	4.79	PASS	4.86	1
3	37048495	1:203134669:C:T	ADORA1	rs148415221	T	ADD	4450	0.09808 [0.09186 - 0.1047]	0.0262	0	0.0007356	0.5244	PASS	4.97	PASS	4.82	1
5	41159254	1:203690433:C:T	ATP2B4	rs149815131	T	ADD	4453	0.2838 [0.2727 - 0.2954]	0.04794	0	0	1	PASS	3.77	PASS	5.08	1
5	156675967	1:204226851:G:A	PLEKHA6	rs138411516	A	ADD	4430	1.937 [1.905 - 1.97]	0.01231	0.0005767	0.007723	0.0005668	PASS	4.61	PASS	4.88	0.1877
1	55075209	1:204378906:G:C	PPP1R15B	rs763050964	C	ADD	4453	3.175 [3.064 - 3.29]	0.04204	0	0	1	PASS	2.78	PASS	1.54	1
20	61048542	1:205901061:A:G	SLC26A9	rs146968808	G	ADD	4451	2.025 [1.985 - 2.066]	0.02636	0	0.0003678	1	PASS	2.89	PASS	3.4	1
20	58514536	1:205904888:C:T	SLC26A9	rs202228683	T	ADD	4451	1.513 [1.496 - 1.531]	0.02443	0.0005767	0	0.3894	PASS	4.26	PASS	4.41	0.6211
2	180835443	1:206650040:G:A	IKBKE	rs145501152	A	ADD	4450	2.096 [2.05 - 2.144]	0.03769	0	0.0007356	0.5244	PASS	6.89	PASS	6.44	1
20	61340774	1:206653876:G:A	IKBKE	rs201014436	A	ADD	4436	0.3297 [0.3183 - 0.3415]	0.04863	0	0.005885	0.0004543	PASS	2.12	PASS	4.01	1
15	43571404	1:207073701:C:T	IL24	rs142816743	T	ADD	4453	3.745 [3.613 - 3.882]	0.0209	0	0	1	PASS	4.48	PASS	4.83	1
20	30193440	1:223568348:G:C	C1orf65	rs150515474	C	ADD	4448	0.5332 [0.5237 - 0.5429]	0.0287	0	0.001471	0.1618	PASS	4.78	PASS	4.98	1
2	48681869	1:224544642:T:G	CNIH4	rs199803522	G	ADD	4431	3.343 [3.236 - 3.455]	0.02061	0	0.007723	4.435e-05	PASS	3.64	PASS	4.01	1
5	80363915	1:225594450:T:A	LBR	rs201212744	A	ADD	4451	4.231 [4.089 - 4.379]	0.008211	0	0.0003678	1	PASS	2.74	PASS	6.06	1
11	551708	1:227174239:GCAC:G	ADCK3	rs1264933656	G	ADD	4450	2.368 [2.312 - 2.424]	0.02257	0	0.0007356	0.5244	PASS	5.15	PASS	4.42	1
1	15905400	1:229790077:A:C	URB2	rs146722378	C	ADD	4453	0.3873 [0.376 - 0.399]	0.04454	0	0	1	PASS	3.17	PASS	3.47	1
2	219411735	1:234534241:A:G	TARBP1	rs138599154	G	ADD	4447	0.2055 [0.1959 - 0.2157]	0.03933	0.00173	0.0007356	0.384	PASS	4.01	PASS	5.44	1
4	156764904	1:235922443:T:G	LYST	rs138443479	G	ADD	4451	2.469 [2.412 - 2.526]	0.01387	0	0.0003678	1	PASS	6.09	PASS	6.27	1
12	52585524	1:236389606:T:C	ERO1LB	rs138588098	C	ADD	4453	3.992 [3.874 - 4.113]	0.00378	0	0	1	PASS	4.22	PASS	3.82	1
16	12875200	1:241767627:A:G	OPN3	rs141356521	G	ADD	4453	0.5506 [0.5403 - 0.5612]	0.04843	0	0	1	PASS	4.54	PASS	4.66	1
1	45806798	2:20130154:C:T	WDR35	rs200042577	T	ADD	4453	0.3012 [0.2919 - 0.3109]	0.01732	0	0	1	PASS	6.15	PASS	4.65	1
1	113197201	2:25384113:T:C	POMC	rs80326661	C	ADD	4429	0.4717 [0.4606 - 0.4831]	0.04768	0	0.008459	1.408e-05	PASS	3.73	PASS	4.34	1
12	49177118	2:27461368:T:C	CAD	rs144692793	C	ADD	4439	1.721 [1.695 - 1.746]	0.02261	0	0.004781	0.002615	PASS	6.42	PASS	5.5	1
1	93029245	2:27799936:G:T	C2orf16	rs180785122	T	ADD	4451	0.2447 [0.2351 - 0.2546]	0.02661	0.0005767	0	0.3894	PASS	6.34	PASS	6.7	1
4	17606211	2:29169337:A:G	WDR43	rs371378758	G	ADD	4444	4.228 [4.046 - 4.417]	0.03949	0	0.002942	0.02636	PASS	1.03	PASS	1.43	1
12	43860593	2:37096709:G:A	STRN	rs200928385	A	ADD	4334	0.2415 [0.2319 - 0.2516]	0.02876	0.01672	0.03273	0.001072	PASS	0.697	PASS	1.41	1
2	74725236	2:37455579:G:T	CEBPZ	rs146131783	T	ADD	4450	0.269 [0.2585 - 0.2799]	0.03823	0	0.0007356	0.5244	PASS	3.01	PASS	6.11	1
4	128951724	2:39042718:T:G	DHX57	rs150735204	G	ADD	4453	1.718 [1.691 - 1.745]	0.02952	0	0	1	PASS	3.72	PASS	4.36	1
10	81070858	2:47601029:G:C	EPCAM	rs146480420	C	ADD	4451	2.65 [2.57 - 2.732]	0.04544	0	0.0003678	1	PASS	6.42	PASS	6.5	1
12	14943551	2:48681869:A:G	PPP1R21	rs151246836	G	ADD	4446	2.186 [2.14 - 2.233]	0.02027	0.002884	0.0003678	0.03619	PASS	2.82	PASS	3.62	1
15	65450109	2:54870254:C:A	SPTBN1	rs144815582	A	ADD	4450	1.709 [1.681 - 1.738]	0.04385	0.001153	0	0.1516	PASS	4.94	PASS	6.78	1
1	224544642	2:61258799:T:C	PEX13	rs202077756	C	ADD	4453	0.149 [0.1422 - 0.1561]	0.01043	0	0	1	PASS	3.02	PASS	4.27	1
4	110667485	2:61577409:A:G	USP34	rs200816142	G	ADD	4395	0.4123 [0.4016 - 0.4232]	0.03329	0.01326	0.0125	0.8914	PASS	4.65	PASS	4.17	1
6	138655606	2:63176179:A:G	EHBP1	rs140508263	G	ADD	4449	3.084 [2.984 - 3.188]	0.03319	0	0.001103	0.2865	PASS	6.24	PASS	6.78	1
20	37357266	2:74725236:T:C	LBX2	rs753669213	C	ADD	4438	2.451 [2.399 - 2.504]	0.008679	0	0.005149	0.001435	PASS	2.87	PASS	3.44	1
15	52622673	2:101097598:C:T	NMS	rs200077599	T	ADD	4451	1.892 [1.865 - 1.919]	0.005047	0	0.0003678	1	PASS	3.65	PASS	4.05	0.3137
17	38140605	2:103236441:C:T	SLC9A2	rs141211710	T	ADD	4445	2.69 [2.623 - 2.758]	0.01389	0.0005767	0.002207	0.2589	PASS	4.45	PASS	5.01	1
1	1396197	2:107459839:TGGA:T	ST6GAL2	rs758410165	T	ADD	4453	1.964 [1.927 - 2.003]	0.02877	0	0	1	PASS	2.84	PASS	3.15	0.1012
17	4804104	2:116510810:A:C	DPP10	rs199848458	C	ADD	4442	0.2436 [0.2351 - 0.2523]	0.0122	0.00519	0.0003678	0.001323	PASS	4.27	PASS	4.52	0.03329
1	40874411	2:127961053:C:G	CYP27C1	rs199549525	G	ADD	4453	2.271 [2.214 - 2.329]	0.04308	0	0	1	PASS	4.9	PASS	6.15	1
22	26887598	2:135887597:C:T	RAB3GAP1	rs150478342	T	ADD	4445	0.4994 [0.4887 - 0.5103]	0.04408	0.00346	0.0003678	0.01619	PASS	4.84	PASS	5.19	1
3	142567193	2:157425466:T:C	GPD2	rs746127163	C	ADD	4453	10.42 [9.735 - 11.16]	0.03127	0	0	1	PASS	0.496	PASS	0.787	1
1	235922443	2:158978085:C:T	UPP2	rs147775009	T	ADD	4451	0.1542 [0.147 - 0.1617]	0.01391	0	0.0003678	1	PASS	6.4	PASS	6.54	1
12	4881738	2:160599672:G:A	MARCH7	rs201825489	A	ADD	4453	5.088 [4.947 - 5.232]	0.0002627	0	0	1	PASS	4.64	PASS	3.23	1
17	79995506	2:163236451:C:T	KCNH7	rs148938064	T	ADD	4453	0.4981 [0.4883 - 0.5082]	0.02844	0	0	1	PASS	4.86	PASS	5.61	1
17	7096379	2:166769021:T:C	TTC21B	rs79037278	C	ADD	4451	0.3919 [0.3806 - 0.4035]	0.04406	0	0.0003678	1	PASS	4.6	PASS	4.3	0.04783
10	101439622	2:174094448:C:T	MLTK	rs200340464	T	ADD	4453	0.2767 [0.2681 - 0.2855]	0.01064	0	0	1	PASS	5.36	PASS	4.74	1
3	37785454	2:180835443:C:G	CWC22	rs143785942	G	ADD	4450	0.2807 [0.2726 - 0.289]	0.006423	0	0.0007356	0.5244	PASS	3.55	PASS	5.15	1
1	89835209	2:187541988:A:G	ITGAV	rs201434983	G	ADD	4450	3.397 [3.287 - 3.511]	0.01974	0.0005767	0.0003678	1	PASS	5.84	PASS	3.9	1
18	61647170	2:190742010:C:T	PMS1	rs142159998	T	ADD	4450	1.86 [1.829 - 1.89]	0.0178	0.0005767	0.0003678	1	PASS	2.81	PASS	3.42	1
3	150931203	2:202626242:C:T	ALS2	rs3219155	T	ADD	4443	0.5472 [0.5378 - 0.5567]	0.02906	0	0.00331	0.01482	PASS	6.97	PASS	6.73	0.2158
20	31379479	2:203329675:A:G	BMPR2	rs757855256	G	ADD	4453	3.284 [3.167 - 3.406]	0.0403	0	0	1	PASS	4.41	PASS	4.4	1
2	20130154	2:206893048:T:C	INO80D	rs755287736	C	ADD	4428	2.784 [2.697 - 2.874]	0.04371	0.001153	0.008091	0.001258	PASS	4.01	PASS	3.27	1
1	21050719	2:209036753:A:G	C2orf80	rs200884540	G	ADD	4451	4.386 [4.191 - 4.59]	0.04162	0.0005767	0	0.3894	PASS	2.03	PASS	3.12	1
11	5717709	2:209308116:G:A	PTH2R	rs149297616	A	ADD	4442	0.5315 [0.5223 - 0.5409]	0.02387	0.001153	0.002942	0.3335	PASS	6.49	PASS	6.3	1
4	1165808	2:219411735:G:A	USP37	rs149823722	A	ADD	4436	0.1185 [0.113 - 0.1242]	0.004706	0.0005767	0.005517	0.007846	PASS	3.75	PASS	4	1
1	92528827	2:219414560:C:G	USP37	rs150600881	G	ADD	4447	0.563 [0.5536 - 0.5726]	0.03209	0.002307	0.0003678	0.07903	PASS	4.27	PASS	4.38	1
5	168233515	2:220478940:A:T	STK11IP	rs768793736	T	ADD	4441	10.98 [10.24 - 11.78]	0.03136	0.00519	0.0007356	0.004746	PASS	0.472	PASS	1.01	1
9	95772651	2:227661003:C:G	IRS1	rs41265094	G	ADD	4449	2.516 [2.456 - 2.577]	0.01607	0	0.001103	0.2865	PASS	6.56	PASS	7.03	1
17	80545038	2:228883868:C:T	SPHKAP	rs149295795	T	ADD	4453	2.471 [2.421 - 2.523]	0.00624	0	0	1	PASS	3.61	PASS	4.42	1
1	159505238	2:232209772:C:T	ARMC9	rs202164814	T	ADD	4447	1.925 [1.887 - 1.964]	0.03831	0.00173	0.0007356	0.384	PASS	2.23	PASS	1.82	1
7	4796793	2:233990592:A:C	INPP5D	rs181242219	C	ADD	4451	5.855 [5.552 - 6.174]	0.0367	0	0.0003678	1	PASS	2.52	PASS	4.17	1
4	114276906	2:233990635:TC:T	INPP5D	rs574989226	T	ADD	4422	2.842 [2.77 - 2.916]	0.0107	0.0005767	0.01067	1.212e-05	PASS	1.56	PASS	2.47	1
3	169988332	2:238461049:C:T	MLPH	rs112711398	T	ADD	4453	1.753 [1.729 - 1.777]	0.01164	0	0	1	PASS	3.13	PASS	3.88	1
3	133538590	2:241465687:C:T	ANKMY1	rs369145221	T	ADD	4453	2.348 [2.286 - 2.411]	0.04285	0	0	1	PASS	4.1	PASS	2.61	1
5	56777915	2:242501804:G:A	BOK	rs145752883	A	ADD	4446	5.169 [4.907 - 5.444]	0.04713	0	0.002207	0.0879	PASS	6.41	PASS	6.54	1
8	91029359	3:9809426:C:T	CAMK1	rs113139851	T	ADD	4453	2.167 [2.12 - 2.215]	0.02644	0	0	1	PASS	2.94	PASS	3.52	1
16	71713444	3:10331519:C:T	GHRL	rs34911341	T	ADD	4446	2.843 [2.761 - 2.928]	0.02608	0.001153	0.001471	1	PASS	6.09	PASS	6.97	1
9	116270817	3:15475992:C:T	EAF1	rs144473936	T	ADD	4453	0.4286 [0.4193 - 0.4382]	0.01627	0	0	1	PASS	4.63	PASS	5.87	1
3	9809426	3:32776360:T:C	CNOT10	rs140420375	C	ADD	4453	0.115 [0.1076 - 0.1229]	0.04095	0	0	1	PASS	2.9	PASS	3.94	1
3	69299198	3:33194431:C:A	SUSD5	rs186544854	A	ADD	4445	2.593 [2.54 - 2.648]	0.004228	0	0.002574	0.04774	PASS	3.7	PASS	4.83	1
14	39512070	3:37048495:G:C	MLH1	rs28930073	C	ADD	4445	3.105 [3.019 - 3.194]	0.01197	0.00346	0.0003678	0.01619	PASS	4.19	PASS	3.83	1
6	32944128	3:37785454:G:A	ITGA9	rs140716372	A	ADD	4453	6.366 [6.053 - 6.695]	0.02124	0	0	1	PASS	5.34	PASS	6.5	1
6	21231212	3:39227504:C:T	XIRP1	rs147374766	T	ADD	4451	2.852 [2.761 - 2.945]	0.04164	0	0.0003678	1	PASS	2.12	PASS	2.44	1
1	67450416	3:49040002:G:A	P4HTM	rs34281016	A	ADD	4453	12.38 [11.56 - 13.26]	0.02145	0	0	1	PASS	6.74	PASS	6.46	1
15	91795601	3:49152707:G:A	USP19	rs150605229	A	ADD	4450	2.002 [1.959 - 2.047]	0.04761	0	0.0007356	0.5244	PASS	4.37	PASS	6.61	1
9	119204756	3:49713560:A:C	APEH	rs149887495	C	ADD	4451	0.4216 [0.4109 - 0.4325]	0.03491	0	0.0003678	1	PASS	2.56	PASS	2.38	1
14	75530246	3:52433643:G:A	DNAH1	rs375846884	A	ADD	4451	2.212 [2.159 - 2.267]	0.04181	0	0.0003678	1	PASS	3.83	PASS	5.86	1
12	6458343	3:58094921:C:T	FLNB	rs776421446	T	ADD	4453	5.354 [5.078 - 5.646]	0.04714	0	0	1	PASS	0.576	PASS	0.454	1
12	75706669	3:61548022:C:T	PTPRG	rs146419543	T	ADD	4453	9.799 [9.137 - 10.51]	0.04061	0	0	1	PASS	4.33	PASS	4.52	1
7	930652	3:63985157:C:A	ATXN7	rs180696871	A	ADD	4450	0.3486 [0.3387 - 0.3588]	0.022	0	0.0007356	0.5244	PASS	4.65	PASS	5.07	1
1	24082352	3:64526863:C:T	ADAMTS9	rs149060903	T	ADD	4450	8.318 [7.981 - 8.669]	0.001324	0.001153	0	0.1516	PASS	5.72	PASS	3.06	1
12	57662227	3:69299198:A:G	FRMD4B	rs377001238	G	ADD	4449	7.444 [7.076 - 7.832]	0.0132	0.00173	0	0.05898	PASS	5.96	PASS	4.4	1
20	61340732	3:108072387:G:A	HHLA2	rs140364028	A	ADD	4449	2.349 [2.311 - 2.387]	0.001015	0	0.001103	0.2865	PASS	2.58	PASS	3.86	1
16	50744892	3:108288265:C:T	KIAA1524	rs149672943	T	ADD	4451	0.4399 [0.4298 - 0.4503]	0.02694	0.0005767	0	0.3894	PASS	3.53	PASS	3.99	1
16	90097838	3:113302293:T:C	SIDT1	rs759763139	C	ADD	4450	2.641 [2.569 - 2.714]	0.02558	0.0005767	0.0003678	1	PASS	0.892	PASS	1.77	0.02809
3	108288265	3:113303574:C:T	SIDT1	rs200959519	T	ADD	4403	1.686 [1.661 - 1.712]	0.02953	0.004614	0.01508	0.0009756	PASS	3.99	PASS	3.9	0.2722
7	99377653	3:113377150:C:A	KIAA2018	rs190594852	A	ADD	4453	0.2903 [0.2815 - 0.2994]	0.01173	0	0	1	PASS	6.11	PASS	4.16	1
2	116510810	3:132221143:G:A	DNAJC13	rs139620588	A	ADD	4439	0.514 [0.5041 - 0.5241]	0.03169	0.002307	0.00331	0.777	PASS	5.01	PASS	5.15	0.01995
19	12975999	3:133467331:G:A	TF	rs146477698	A	ADD	4451	2.51 [2.456 - 2.565]	0.007796	0	0.0003678	1	PASS	5.82	PASS	5.42	1
1	35369951	3:133538590:T:C	SRPRB	rs369392814	C	ADD	4449	0.3002 [0.2909 - 0.3099]	0.01744	0	0.001103	0.2865	PASS	5.57	PASS	5.64	1
17	33507648	3:134329052:G:C	KY	rs774464040	C	ADD	4434	3.305 [3.183 - 3.431]	0.04525	0	0.00662	0.0002825	PASS	3.3	PASS	4.15	1
6	130497047	3:135745716:C:T	PPP2R3A	rs367543396	T	ADD	4442	1.85 [1.815 - 1.885]	0.04387	0.002307	0.002207	1	PASS	5.97	PASS	6.17	1
1	4834519	3:135975431:G:A	PCCB	rs138246328	A	ADD	4453	4.613 [4.41 - 4.826]	0.03315	0	0	1	PASS	2.58	PASS	2.26	1
19	53454022	3:138224274:G:C	CEP70	rs61996332	C	ADD	4404	10.19 [9.504 - 10.92]	0.03611	0.01557	0.007723	0.01671	PASS	3.15	PASS	4.58	1
1	227174239	3:142567193:C:T	PCOLCE2	rs147227072	T	ADD	4453	0.3878 [0.3799 - 0.3958]	0.003672	0	0	1	PASS	6.28	PASS	6.4	1
8	144896066	3:146177660:G:A	PLSCR2	rs61743813	A	ADD	4446	2.446 [2.395 - 2.497]	0.007135	0.00173	0.001103	0.6837	PASS	6.5	PASS	6.6	1
5	24537539	3:150931203:G:A	P2RY14	rs74811185	A	ADD	4451	4.459 [4.27 - 4.656]	0.03017	0	0.0003678	1	PASS	4.22	PASS	4.59	1
17	60106962	3:151165557:TAA:T	IGSF10	rs780500419	T	ADD	4453	0.4381 [0.4279 - 0.4485]	0.02754	0	0	1	PASS	4.24	PASS	4.36	1
8	17822208	3:151166124:A:G	IGSF10	rs146828199	G	ADD	4451	0.4003 [0.3905 - 0.4103]	0.02038	0	0.0003678	1	PASS	4.19	PASS	4.77	1
7	158723198	3:167184888:C:A	SERPINI2	rs61750374	A	ADD	4445	7.929 [7.535 - 8.343]	0.01078	0.00346	0.0003678	0.01619	PASS	4.75	PASS	4.94	1
8	26721814	3:169557891:G:A	LRRC31	rs187788865	A	ADD	4453	5.862 [5.554 - 6.187]	0.0399	0	0	1	PASS	6.48	PASS	6.4	1
7	5642923	3:169988332:C:T	PRKCI	rs141965722	T	ADD	4438	3.687 [3.556 - 3.822]	0.02335	0.007497	0.0003678	4.126e-05	PASS	2.67	PASS	3.7	1
5	176316461	3:183097166:G:A	MCF2L2	rs200353022	A	ADD	4441	2.066 [2.025 - 2.107]	0.02194	0.0005767	0.003678	0.0596	PASS	3.05	PASS	2.61	0.1105
17	18284999	3:183960671:C:T	ALG3	rs186946267	T	ADD	4450	4.184 [4.023 - 4.351]	0.02211	0.0005767	0.0003678	1	PASS	3.83	PASS	4.52	1
15	89169705	3:194371914:G:A	LSG1	rs200785668	A	ADD	4450	0.4408 [0.4301 - 0.4518]	0.03657	0.001153	0	0.1516	PASS	2.63	PASS	1.72	1
6	31675486	4:952210:C:T	TMEM175	rs201314478	T	ADD	4308	0.1504 [0.1435 - 0.1577]	0.01209	0.02364	0.03825	0.0072	PASS	3.22	PASS	6.06	1
19	43968565	4:5620263:G:A	EVC2	rs140951974	A	ADD	4453	3.991 [3.839 - 4.149]	0.02547	0	0	1	PASS	6.3	PASS	6.34	1
12	110224531	4:5687210:C:T	EVC2	rs113806963	T	ADD	4440	1.809 [1.775 - 1.844]	0.04833	0.005767	0.0007356	0.002187	PASS	2.44	PASS	3.39	1
9	133374929	4:13601182:C:G	BOD1L1	rs139979424	G	ADD	4453	3.516 [3.378 - 3.659]	0.04815	0	0	1	PASS	6.02	PASS	3.78	1
21	43771047	4:17606211:G:A	LAP3	rs201310005	A	ADD	4449	2.201 [2.162 - 2.242]	0.006502	0.00173	0	0.05898	PASS	4.54	PASS	4.12	0.008076
19	43990841	4:37636545:C:T	RELL1	rs201116768	T	ADD	4453	0.1969 [0.1877 - 0.2066]	0.03372	0	0	1	PASS	3.67	PASS	3.91	1
15	51749628	4:70504823:G:C	UGT2A1	rs149059274	C	ADD	4449	2.265 [2.214 - 2.318]	0.02635	0	0.001103	0.2865	PASS	6.38	PASS	6.96	1
16	22145749	4:80327982:C:T	GK2	rs151024112	T	ADD	4453	2.977 [2.904 - 3.053]	0.006088	0	0	1	PASS	3.17	PASS	6.43	1
17	76399916	4:84200153:C:T	COQ2	rs752363398	T	ADD	4425	3.712 [3.574 - 3.855]	0.02944	0.0005767	0.009562	3.596e-05	PASS	1.15	PASS	2.53	1
6	167417266	4:87672251:A:G	PTPN13	rs200688335	G	ADD	4446	0.4125 [0.4013 - 0.4239]	0.04285	0.0005767	0.001839	0.4147	PASS	1.78	PASS	1.91	1
2	27799936	4:110667485:T:C	CFI	rs41278047	C	ADD	4451	0.7989 [0.7935 - 0.8042]	0.03611	0	0.0003678	1	PASS	6.63	PASS	5.9	0.2649
15	66220799	4:110920947:G:A	EGF	rs75935899	A	ADD	4451	5.655 [5.371 - 5.954]	0.03497	0.0005767	0	0.3894	PASS	4.94	PASS	4.65	1
14	55857649	4:111469357:G:A	ENPEP	rs141772249	A	ADD	4283	0.1039 [0.09734 - 0.1109]	0.02994	0.02826	0.04413	0.007774	PASS	5.67	PASS	-0.1713	1
10	37438591	4:113353311:G:A	ALPK1	rs2074380	A	ADD	4453	2.093 [2.045 - 2.142]	0.04463	0	0	1	PASS	3.18	PASS	5.11	1
6	154411284	4:113353433:A:C	ALPK1	rs35308602	C	ADD	4453	2.093 [2.045 - 2.142]	0.04463	0	0	1	PASS	3.58	PASS	6.27	1
19	46973026	4:113505203:A:G	C4orf21	rs3828539	G	ADD	4446	2.088 [2.041 - 2.137]	0.04524	0.001153	0.001471	1	PASS	5.25	PASS	5.76	1
15	62238002	4:114276906:G:A	ANK2	rs141191319	A	ADD	4453	2.591 [2.524 - 2.659]	0.02117	0	0	1	PASS	5.12	PASS	5.24	1
6	51889474	4:128951724:C:T	C4orf29	rs202120305	T	ADD	4439	2.051 [2.014 - 2.089]	0.01414	0.0005767	0.004413	0.02129	PASS	5.55	PASS	5.41	1
17	40646429	4:141458699:A:C	ELMOD2	rs149594258	C	ADD	4430	2.801 [2.74 - 2.864]	0.003313	0.00346	0.005885	0.3808	PASS	4.22	PASS	6.54	1
10	134261501	4:154624709:T:C	TLR2	rs139227237	C	ADD	4451	2.65 [2.571 - 2.732]	0.04392	0	0.0003678	1	PASS	6.7	PASS	6.72	1
12	112165873	4:156764904:G:T	ASIC5	rs140518137	T	ADD	4451	2.697 [2.636 - 2.758]	0.005864	0	0.0003678	1	PASS	3.59	PASS	3.79	1
4	84232010	4:160264178:A:G	RAPGEF2	rs200131515	G	ADD	4450	0.4629 [0.4533 - 0.4727]	0.02104	0.0005767	0.0003678	1	PASS	4.2	PASS	4.13	1
3	39227504	4:185074832:G:T	ENPP6	rs150523817	T	ADD	4453	3.367 [3.253 - 3.486]	0.02796	0	0	1	PASS	4.93	PASS	5.17	1
10	127441421	5:3600305:C:T	IRX1	rs774952040	T	ADD	4429	11 [10.27 - 11.79]	0.02928	0.00173	0.007356	0.009534	PASS	1.6	PASS	0.509	1
22	37770047	5:24537539:G:A	CDH10	rs139913021	A	ADD	4447	3.861 [3.725 - 4.002]	0.01807	0.001153	0.001103	1	PASS	3.29	PASS	5.47	1
20	33539651	5:36985729:G:A	NIPBL	rs80358359	A	ADD	4450	0.3567 [0.3472 - 0.3664]	0.01609	0.001153	0	0.1516	PASS	2.71	PASS	3.28	1
17	42818710	5:40955653:A:C	C7	rs3792646	C	ADD	4442	0.1817 [0.173 - 0.1908]	0.02937	0.001153	0.002942	0.3335	PASS	4.18	PASS	5.16	1
2	202626242	5:41159254:G:A	C6	rs142881576	A	ADD	4453	3.601 [3.487 - 3.719]	0.0127	0	0	1	PASS	2.1	PASS	3.32	1
13	25914097	5:41161898:C:T	C6	rs142896559	T	ADD	4453	0.2841 [0.2743 - 0.2942]	0.02458	0	0	1	PASS	5.33	PASS	5.63	1
1	206650040	5:56777915:C:T	ACTBL2	rs146468598	T	ADD	4450	0.4509 [0.4401 - 0.4619]	0.0381	0	0.0007356	0.5244	PASS	4.33	PASS	3.76	1
5	9054313	5:70820029:A:G	BDP1	rs374161441	G	ADD	4453	6.38 [6.039 - 6.739]	0.03415	0	0	1	PASS	3.34	PASS	3.06	1
11	65734769	5:71756519:C:A	ZNF366	rs142021145	A	ADD	4448	3.12 [3.012 - 3.232]	0.04282	0.0005767	0.001103	1	PASS	4.64	PASS	6.62	1
7	148768650	5:72359671:G:A	FCHO2	rs199637246	A	ADD	4448	4.477 [4.305 - 4.657]	0.01669	0.0005767	0.001103	1	PASS	4.97	PASS	5.79	1
15	45457004	5:74137405:C:T	FAM169A	rs754779943	T	ADD	4448	2.079 [2.033 - 2.126]	0.04008	0.0005767	0.001103	1	PASS	2.1	PASS	2.79	0.05441
11	61511262	5:75979027:G:A	IQGAP2	rs185223948	A	ADD	4442	1.784 [1.758 - 1.81]	0.01344	0.002884	0.001839	0.5251	PASS	5.23	PASS	6.23	1
2	233990635	5:76758927:G:A	WDR41	rs765053100	A	ADD	4442	3.704 [3.562 - 3.851]	0.035	0.002307	0.002207	1	PASS	1.27	PASS	0.708	1
18	21083647	5:80363915:G:A	RASGRF2	rs142384849	A	ADD	4443	3.711 [3.596 - 3.829]	0.008702	0.004614	0.0003678	0.003085	PASS	5.15	PASS	5.45	1
3	183960671	5:108516527:G:C	FER	rs760355122	C	ADD	4450	5.797 [5.489 - 6.123]	0.04375	0.0005767	0.0003678	1	PASS	4.26	PASS	3.09	1
1	117146542	5:112116562:C:G	APC	rs141576417	G	ADD	4444	0.6131 [0.6039 - 0.6225]	0.04257	0.002884	0.001103	0.2752	PASS	3.01	PASS	4.1	1
1	225594450	5:118485270:G:A	DMXL1	rs138554077	A	ADD	4450	1.352 [1.339 - 1.364]	0.04166	0	0.0007356	0.5244	PASS	5.89	PASS	5.37	1
16	2141776	5:118969821:G:A	FAM170A	rs201058626	A	ADD	4453	1.333 [1.321 - 1.345]	0.04627	0	0	1	PASS	6.31	PASS	6.17	0.7471
7	99463571	5:140215871:C:G	PCDHA7	rs146878440	G	ADD	4449	1.666 [1.642 - 1.69]	0.0256	0	0.001103	0.2865	PASS	5.37	PASS	4.17	1
1	63999123	5:140580024:C:T	PCDHB11	rs376140389	T	ADD	4450	12.76 [11.89 - 13.7]	0.02432	0	0.0007356	0.5244	PASS	1.74	PASS	1.53	1
21	43733628	5:140603105:C:T	PCDHB14	rs147283704	T	ADD	4430	1.773 [1.747 - 1.799]	0.01337	0	0.008091	2.478e-05	PASS	4.36	PASS	4.32	1
11	67075354	5:140751537:CG:C	PCDHGB3	rs748554819	C	ADD	4439	1.759 [1.734 - 1.785]	0.01359	0.0005767	0.004413	0.02129	PASS	3.43	PASS	2.57	1
8	22481483	5:149758522:G:T	TCOF1	rs373946807	T	ADD	4449	0.09582 [0.08978 - 0.1023]	0.02392	0.00173	0	0.05898	PASS	4.89	PASS	4.77	1
3	133467331	5:150028859:C:T	SYNPO	rs201031282	T	ADD	4453	4.333 [4.142 - 4.532]	0.04098	0	0	1	PASS	3.17	PASS	3.36	1
7	158716310	5:156675967:C:T	ITK	rs34482255	T	ADD	4450	2.037 [2.001 - 2.073]	0.01168	0.0005767	0.0003678	1	PASS	6.52	PASS	6.12	1
2	61258799	5:168233515:C:T	SLIT3	rs142786198	T	ADD	4453	4.889 [4.676 - 5.112]	0.02536	0	0	1	PASS	3.54	PASS	5.24	1
9	139282004	5:172362200:G:A	ERGIC1	rs141880390	A	ADD	4453	2.008 [1.972 - 2.045]	0.01632	0	0	1	PASS	4.71	PASS	4.91	1
11	111431050	5:176316461:C:T	HK3	rs143604141	T	ADD	4451	2.776 [2.717 - 2.835]	0.002499	0	0.0003678	1	PASS	6.14	PASS	4.65	1
16	84035943	5:176942767:G:A	DDX41	rs142143752	A	ADD	4453	2.855 [2.763 - 2.95]	0.04441	0	0	1	PASS	1.86	PASS	3.78	1
4	185074832	6:2678532:TC:T	MYLK4	rs770699387	T	ADD	4451	5.175 [4.913 - 5.451]	0.04704	0.0005767	0	0.3894	PASS	4.43	PASS	4.98	1
19	55624058	6:4069739:C:G	FAM217A	rs150752718	G	ADD	4451	8.955 [8.501 - 9.433]	0.008183	0	0.0003678	1	PASS	4.2	PASS	3.44	1
10	5788887	6:17602890:T:A	FAM8A1	rs750260210	A	ADD	4451	10.27 [9.554 - 11.04]	0.04293	0.0005767	0	0.3894	PASS	0.828	PASS	0.497	1
19	15760012	6:21231212:C:T	CDKAL1	rs142991131	T	ADD	4451	4.074 [3.933 - 4.22]	0.01235	0	0.0003678	1	PASS	3.59	PASS	4.32	1
19	15760014	6:26020892:A:G	HIST1H3A	rs144238254	G	ADD	4453	9.759 [9.087 - 10.48]	0.04517	0	0	1	PASS	2.28	PASS	2.96	1
9	88842282	6:27778171:A:T	HIST1H3H	rs139893026	T	ADD	4451	1.717 [1.689 - 1.746]	0.04109	0	0.0003678	1	PASS	4.66	PASS	4.4	1
8	10622935	6:29080523:C:T	OR2J3	rs200977978	T	ADD	4451	3.82 [3.673 - 3.972]	0.03148	0	0.0003678	1	PASS	4.29	PASS	4.68	1
12	109692110	6:31675486:G:A	LY6G6F	rs149233297	A	ADD	4451	10.78 [10.06 - 11.55]	0.03167	0	0.0003678	1	PASS	-0.6573	PASS	0.29	1
17	62038602	6:32944128:C:T	BRD2	rs176250	T	ADD	4447	1.27 [1.261 - 1.279]	0.03396	0	0.001839	0.1638	PASS	6.54	PASS	6.82	0.1108
20	49354499	6:33263971:C:A	RGL2	rs147052044	A	ADD	4450	3.518 [3.411 - 3.629]	0.01101	0.0005767	0.0003678	1	PASS	1.65	PASS	4.13	1
17	63156655	6:33652456:A:C	ITPR3	rs142457410	C	ADD	4446	10.38 [9.677 - 11.13]	0.03649	0	0.002207	0.0879	PASS	2.21	PASS	3.76	1
9	72938446	6:34952873:G:A	ANKS1A	rs34483936	A	ADD	4446	5.455 [5.167 - 5.759]	0.04973	0.0005767	0.001839	0.4147	PASS	4.49	PASS	4.87	1
19	48581032	6:35454343:C:T	TEAD3	rs200333127	T	ADD	4447	3.944 [3.781 - 4.114]	0.04136	0	0.001839	0.1638	PASS	1.56	PASS	2.84	1
15	57999127	6:35837283:G:C	SRPK1	rs186925364	C	ADD	4450	0.1015 [0.09502 - 0.1084]	0.0291	0.0005767	0.0003678	1	PASS	4.07	PASS	4.13	1
11	64974282	6:36343669:G:A	ETV7	rs200598175	A	ADD	4453	2.242 [2.191 - 2.295]	0.02896	0	0	1	PASS	4.28	PASS	4.23	1
9	135763825	6:36887436:A:G	C6orf89	rs144031629	G	ADD	4453	2.141 [2.094 - 2.189]	0.03173	0	0	1	PASS	4.35	PASS	4.57	1
10	50732247	6:39832264:G:A	DAAM2	rs6919807	A	ADD	4426	0.5669 [0.5575 - 0.5765]	0.03306	0.004614	0.00662	0.428	PASS	4.41	PASS	6.38	1
3	157839955	6:43306002:C:G	ZNF318	rs368375236	G	ADD	4450	5.64 [5.352 - 5.944]	0.03862	0	0.0007356	0.5244	PASS	3.28	PASS	2.91	1
3	49040002	6:47254244:C:T	TNFRSF21	rs148598211	T	ADD	4451	2.521 [2.453 - 2.591]	0.03466	0	0.0003678	1	PASS	5.31	PASS	6.84	1
22	36055507	6:47650349:T:C	GPR111	rs181503635	C	ADD	4450	2.274 [2.223 - 2.327]	0.02487	0	0.0007356	0.5244	PASS	4.72	PASS	6.1	1
14	95918606	6:51889474:C:T	PKHD1	rs141103838	T	ADD	4453	0.3485 [0.3397 - 0.3576]	0.00973	0	0	1	PASS	5.17	PASS	5.12	1
8	67341818	6:90333624:G:A	ANKRD6	rs184506044	A	ADD	4450	0.1006 [0.09415 - 0.1075]	0.02955	0.0005767	0.0003678	1	PASS	5.15	PASS	6.69	1
21	41160099	6:108840919:C:T	LACE1	rs143288127	T	ADD	4450	2.764 [2.686 - 2.845]	0.02595	0	0.0007356	0.5244	PASS	4.3	PASS	5.28	1
1	149871811	6:116599859:T:C	TSPYL1	rs45490498	C	ADD	4450	4.625 [4.418 - 4.841]	0.03537	0	0.0007356	0.5244	PASS	7.01	PASS	6.72	1
19	35250996	6:118635315:C:A	SLC35F1	rs141802559	A	ADD	4453	2.574 [2.502 - 2.647]	0.03573	0	0	1	PASS	3.51	PASS	4.7	1
12	7640420	6:122773136:T:G	SERINC1	rs145924073	G	ADD	4437	0.5111 [0.5011 - 0.5213]	0.03262	0.004037	0.002942	0.5998	PASS	3.8	PASS	3.79	1
16	27777733	6:127898374:T:G	C6orf58	rs150182872	G	ADD	4444	0.5664 [0.5571 - 0.5757]	0.02977	0.0005767	0.002574	0.1611	PASS	4.81	PASS	4.95	1
12	95451408	6:127901445:G:A	C6orf58	rs201317295	A	ADD	4451	2.674 [2.61 - 2.738]	0.009891	0	0.0003678	1	PASS	2.85	PASS	4.62	1
17	59821817	6:130497047:C:T	SAMD3	rs200849847	T	ADD	4450	0.4958 [0.4869 - 0.5048]	0.01502	0.0005767	0.0003678	1	PASS	3.46	PASS	4.26	0.2332
7	127544817	6:131190965:C:T	EPB41L2	rs147524336	T	ADD	4453	2.061 [2.018 - 2.105]	0.03184	0	0	1	PASS	6.31	PASS	5.92	1
16	75646553	6:135513614:C:T	MYB	rs146156073	T	ADD	4451	1.935 [1.894 - 1.976]	0.04878	0.0005767	0	0.3894	PASS	4.8	PASS	4.41	0.07235
11	118529702	6:138655606:AAGG:A	KIAA1244	rs777828045	A	ADD	4435	0.46 [0.4507 - 0.4695]	0.01725	0	0.006252	0.0002617	PASS	3.74	PASS	5.94	0.1656
20	1460491	6:142409417:C:A	NMBR	rs143952823	A	ADD	4453	3.526 [3.421 - 3.635]	0.009305	0	0	1	PASS	5.41	PASS	4.46	1
11	123624553	6:146126397:G:C	FBXO30	rs17075385	C	ADD	4453	0.2235 [0.213 - 0.2345]	0.04999	0	0	1	PASS	7.31	PASS	4.6	1
19	12800595	6:146275983:T:G	SHPRH	rs117586623	G	ADD	4448	0.2235 [0.213 - 0.2344]	0.04996	0	0.001471	0.1618	PASS	6.93	PASS	7.08	1
22	19789574	6:146870636:A:G	RAB32	rs139327388	G	ADD	4450	2.548 [2.49 - 2.607]	0.01064	0.001153	0	0.1516	PASS	6.4	PASS	3.72	1
8	145649408	6:154411284:T:C	OPRM1	rs79220505	C	ADD	4442	0.1919 [0.1828 - 0.2014]	0.03217	0.002307	0.002207	1	PASS	1.9	PASS	1.79	1
7	33545217	6:158490659:G:A	SYNJ2	rs144180367	A	ADD	4451	0.2329 [0.2239 - 0.2423]	0.02058	0	0.0003678	1	PASS	3.74	PASS	5.24	1
17	27421108	6:167417266:T:G	FGFR1OP	rs140062109	G	ADD	4447	2.327 [2.265 - 2.39]	0.04762	0.001153	0.001103	1	PASS	3.91	PASS	4.66	1
10	71021004	6:168443258:G:A	KIF25	rs200480792	A	ADD	4441	11.73 [10.94 - 12.58]	0.02638	0.002307	0.002574	1	PASS	3.15	PASS	6.17	1
3	102187978	6:170597327:G:A	DLL1	rs201058323	A	ADD	4451	2.409 [2.348 - 2.472]	0.03154	0	0.0003678	1	PASS	6.32	PASS	5.6	1
17	66352836	7:930652:C:T	GET4	rs200742822	T	ADD	4442	7.263 [6.907 - 7.638]	0.01349	0.0005767	0.00331	0.1001	PASS	1.69	PASS	0.538	1
3	15475992	7:1097555:G:A	GPR146	rs61997249	A	ADD	4448	2.369 [2.314 - 2.425]	0.02164	0	0.001471	0.1618	PASS	4.02	PASS	4.61	1
19	58640747	7:5642923:G:A	FSCN1	rs201645418	A	ADD	4453	3.123 [3.032 - 3.217]	0.01618	0	0	1	PASS	1.88	PASS	4.68	1
1	186324810	7:6062981:G:A	AIMP2	rs11544566	A	ADD	4442	0.2015 [0.1914 - 0.212]	0.04895	0	0.003678	0.00848	PASS	1.07	PASS	2.14	1
16	74685979	7:18067174:T:G	PRPS1L1	rs199799262	G	ADD	4453	0.5338 [0.5242 - 0.5436]	0.03051	0	0	1	PASS	5.97	PASS	5.71	0.2096
9	34490416	7:20193899:C:T	MACC1	rs145417032	T	ADD	4453	0.4575 [0.448 - 0.4672]	0.01965	0	0	1	PASS	2.89	PASS	5.24	0.1391
12	21448681	7:33545217:A:T	BBS9	rs61764068	T	ADD	4450	2.381 [2.325 - 2.44]	0.02456	0.001153	0	0.1516	PASS	4.88	PASS	4.46	1
16	50744565	7:36657926:G:A	AOAH	rs80187893	A	ADD	4450	0.6008 [0.5921 - 0.6097]	0.02874	0.0005767	0.0003678	1	PASS	4.01	PASS	4.71	0.4495
22	23626158	7:45007498:C:T	MYO1G	rs200445653	T	ADD	4453	6.295 [6.039 - 6.561]	0.00531	0	0	1	PASS	5.23	PASS	3.91	1
12	95456460	7:47408073:C:T	TNS3	rs199938891	T	ADD	4399	1.756 [1.73 - 1.782]	0.01848	0.004037	0.01692	5.097e-05	PASS	3.57	PASS	4.19	1
1	169761884	7:70800578:G:A	WBSCR17	rs145721199	A	ADD	4424	2.298 [2.243 - 2.355]	0.03288	0.009227	0.004413	0.05307	PASS	2.33	PASS	3.64	1
16	1561036	7:76924016:G:A	CCDC146	rs201786512	A	ADD	4451	2.234 [2.189 - 2.281]	0.01517	0	0.0003678	1	PASS	4.46	PASS	4.44	1
8	17159718	7:87195540:T:C	ABCB1	rs60419673	C	ADD	4453	0.3521 [0.3427 - 0.3617]	0.01547	0	0	1	PASS	4.86	PASS	5	1
2	209308116	7:92765077:G:A	SAMD9L	rs372301151	A	ADD	4449	6.357 [6.13 - 6.593]	0.001433	0	0.001103	0.2865	PASS	4.78	PASS	5.15	1
17	16331627	7:94917985:C:G	PPP1R9A	rs143809438	G	ADD	4453	5.322 [5.047 - 5.611]	0.04761	0	0	1	PASS	3.43	PASS	4.46	1
7	76924016	7:98987580:G:T	ARPC1B	rs143427534	T	ADD	4453	1.53 [1.511 - 1.549]	0.02788	0	0	1	PASS	5.92	PASS	5.94	0.5441
5	66479874	7:99377653:G:A	CYP3A4	rs367582027	A	ADD	4440	14.29 [13.36 - 15.28]	0.01292	0.00692	0	1.187e-05	PASS	3	PASS	3.94	1
6	127901445	7:99463571:A:G	CYP3A43	rs368553591	G	ADD	4448	0.2589 [0.2487 - 0.2696]	0.03586	0.0005767	0.001103	1	PASS	1.52	PASS	1.48	1
19	15224482	7:107674718:G:A	LAMB4	rs140745252	A	ADD	4453	0.2507 [0.2421 - 0.2596]	0.01297	0	0	1	PASS	3.12	PASS	4.34	1
17	10346811	7:107689771:C:G	LAMB4	rs769944369	G	ADD	4436	3.398 [3.269 - 3.532]	0.04785	0.004037	0.00331	0.7985	PASS	-1.651	PASS	-0.6983	1
16	30594056	7:113518157:A:C	PPP1R3A	rs35572169	C	ADD	4451	3.126 [3.029 - 3.225]	0.0227	0	0.0003678	1	PASS	2.25	PASS	6.24	1
19	16495999	7:127544817:A:G	SND1	rs144122605	G	ADD	4451	0.1865 [0.1776 - 0.1958]	0.03075	0.0005767	0	0.3894	PASS	4.16	PASS	3.99	1
2	27461368	7:138417790:C:T	ATP6V0A4	rs150912912	T	ADD	4447	2.173 [2.135 - 2.211]	0.005577	0.002884	0	0.008922	PASS	1.5	PASS	1.4	1
20	44530943	7:148768650:C:T	ZNF786	rs200849662	T	ADD	4435	2.766 [2.697 - 2.838]	0.01186	0.001153	0.005517	0.02333	PASS	5.43	PASS	3.82	1
12	56863068	7:150034533:G:A	LRRC61	rs61744057	A	ADD	4428	1.314 [1.303 - 1.326]	0.04984	0.002884	0.006988	0.09151	PASS	6.31	PASS	6.53	1
3	113377150	7:158464295:G:A	NCAPG2	rs61752019	A	ADD	4453	0.3968 [0.3874 - 0.4066]	0.0166	0	0	1	PASS	4.89	PASS	5.07	1
5	140580024	7:158716310:G:A	WDR60	rs759559421	A	ADD	4453	16.08 [15.01 - 17.22]	0.01131	0	0	1	PASS	1.32	PASS	3.01	1
14	105209422	7:158723198:G:C	WDR60	rs201839458	C	ADD	4440	1.571 [1.549 - 1.593]	0.04437	0.0005767	0.004046	0.03553	PASS	3.16	PASS	3.63	0.06053
7	92205120	8:623604:C:A	ERICH1	rs145547111	A	ADD	4453	3.87 [3.765 - 3.978]	0.002055	0	0	1	PASS	3.54	PASS	2.55	1
6	142400021	8:3009020:G:A	CSMD1	rs201704028	A	ADD	4437	0.2003 [0.1911 - 0.21]	0.03238	0.002884	0.003678	0.7938	PASS	4.61	PASS	6.2	1
22	24984275	8:11407666:A:G	BLK	rs137986278	G	ADD	4451	2.84 [2.754 - 2.929]	0.03358	0.0005767	0	0.3894	PASS	2.77	PASS	1.72	1
11	59811030	8:17159718:A:G	MTMR7	rs117739013	G	ADD	4453	6.888 [6.554 - 7.24]	0.01511	0	0	1	PASS	4.28	PASS	4.5	1
1	2441500	8:17612562:T:A	MTUS1	rs201091356	A	ADD	4451	1.571 [1.55 - 1.593]	0.0424	0	0.0003678	1	PASS	6.44	PASS	6.46	1
11	64428581	8:17822208:A:T	PCM1	rs202123221	T	ADD	4451	2.643 [2.58 - 2.707]	0.01078	0.0005767	0	0.3894	PASS	3.93	PASS	4.26	1
19	11305178	8:20005574:A:G	SLC18A1	rs138289026	G	ADD	4451	1.294 [1.283 - 1.304]	0.04555	0	0.0003678	1	PASS	4.43	PASS	4.66	1
7	107674718	8:22481483:T:C	BIN3	rs200582557	C	ADD	4433	0.4533 [0.4437 - 0.4632]	0.02147	0	0.007356	8.078e-05	PASS	1.91	PASS	2.91	1
3	88205660	8:23225606:C:T	LOXL2	rs144452398	T	ADD	4450	4.324 [4.176 - 4.478]	0.008733	0	0.0007356	0.5244	PASS	2.91	PASS	4.01	1
9	35750887	8:23306400:C:G	ENTPD4	rs200234401	G	ADD	4450	2.879 [2.804 - 2.956]	0.01204	0.0005767	0.0003678	1	PASS	2.93	PASS	2.85	1
11	22291883	8:26721814:C:G	ADRA1A	rs745411477	G	ADD	4447	5.648 [5.402 - 5.905]	0.01479	0.0005767	0.001471	0.6546	PASS	1.19	PASS	3.3	1
4	8218840	8:27358496:G:A	EPHX2	rs72475803	A	ADD	4448	5.456 [5.262 - 5.657]	0.003262	0.00173	0.0003678	0.306	PASS	4.91	PASS	5	1
19	50983377	8:61655366:C:T	CHD7	rs753953205	T	ADD	4448	4.27 [4.113 - 4.433]	0.0151	0	0.001471	0.1618	PASS	0.887	PASS	1.21	1
17	37822174	8:67341818:A:G	RRS1	rs772344805	G	ADD	4449	11.67 [10.9 - 12.48]	0.02291	0.0005767	0.0007356	1	PASS	1.76	PASS	0.829	1
11	17111340	8:87151779:G:T	ATP6V0D2	rs200614661	T	ADD	4451	0.2838 [0.2739 - 0.294]	0.02601	0	0.0003678	1	PASS	3.44	PASS	3.63	1
2	135887597	8:105503097:A:G	LRP12	rs142053596	G	ADD	4449	0.2958 [0.2855 - 0.3066]	0.0323	0	0.001103	0.2865	PASS	4.11	PASS	4.96	1
7	87195540	8:125047645:C:T	FER1L6	rs189112958	T	ADD	4450	1.428 [1.414 - 1.441]	0.0195	0.0005767	0.0003678	1	PASS	5.26	PASS	5.31	0.4493
1	161681124	8:125463937:G:C	TRMT12	rs148858836	C	ADD	4453	0.245 [0.2345 - 0.256]	0.04447	0	0	1	PASS	6.36	PASS	6.67	1
1	874748	8:144896066:T:G	SCRIB	rs112295309	G	ADD	4425	4.494 [4.297 - 4.701]	0.03619	0.0005767	0.009562	3.596e-05	PASS	1.55	PASS	2.74	1
3	49713560	8:145830957:C:G	ARHGAP39	rs200377993	G	ADD	4451	6.45 [6.131 - 6.786]	0.02119	0	0.0003678	1	PASS	5.5	PASS	3.57	1
8	61655366	9:990856:G:A	DMRT3	rs142983095	A	ADD	4451	0.4255 [0.4151 - 0.436]	0.02925	0	0.0003678	1	PASS	6.19	PASS	6.09	1
16	67943505	9:4663252:A:C	PPAPDC2	rs72695803	C	ADD	4435	1.822 [1.788 - 1.858]	0.04914	0.0005767	0.005885	0.004518	PASS	4.47	PASS	4.56	1
3	32776360	9:5123006:A:T	JAK2	rs199942090	T	ADD	4437	2.98 [2.885 - 3.079]	0.03545	0.00173	0.004413	0.1852	PASS	2.83	PASS	4.94	1
17	74387071	9:18829865:T:C	ADAMTSL1	rs775253070	C	ADD	4453	3.736 [3.588 - 3.891]	0.04131	0	0	1	PASS	0.823	PASS	0.686	1
17	49350738	9:33120496:G:C	B4GALT1	rs201417912	C	ADD	4453	2.758 [2.676 - 2.843]	0.0364	0	0	1	PASS	5.01	PASS	5.67	1
6	39832264	9:33464897:T:C	NOL6	rs142747625	C	ADD	4453	3.895 [3.768 - 4.027]	0.01028	0	0	1	PASS	4.63	PASS	4.96	1
1	202097319	9:34250736:G:C	UBAP1	rs778478644	C	ADD	4453	9.726 [9.06 - 10.44]	0.04439	0	0	1	PASS	-1.552	PASS	-0.246	1
1	47024318	9:34490416:A:G	DNAI1	rs146203427	G	ADD	4447	1.996 [1.954 - 2.038]	0.03902	0.002884	0	0.008922	PASS	6.34	PASS	6.35	1
19	48879400	9:34657473:C:T	IL11RA	rs143377309	T	ADD	4447	0.6365 [0.6284 - 0.6446]	0.02654	0.001153	0.001103	1	PASS	4.73	PASS	4.57	0.5808
5	149758522	9:35750887:C:G	RGP1	rs199844813	G	ADD	4450	1.416 [1.401 - 1.431]	0.04063	0	0.0007356	0.5244	PASS	6.41	PASS	6.44	0.6468
11	488541	9:100128026:G:C	CCDC180	rs200136328	C	ADD	4451	3.063 [2.957 - 3.172]	0.04521	0.0005767	0	0.3894	PASS	4.66	PASS	5.05	1
10	46122051	9:101990210:C:T	SEC61B	rs148143457	T	ADD	4451	0.4443 [0.4341 - 0.4548]	0.0288	0	0.0003678	1	PASS	3.62	PASS	3.94	1
10	124008247	9:114356542:G:C	PTGR1	rs199615972	C	ADD	4444	0.3132 [0.3022 - 0.3247]	0.04238	0.004614	0	0.0005235	PASS	5.51	PASS	4.14	1
15	42437767	9:116151795:C:T	ALAD	rs200180791	T	ADD	4451	5.803 [5.493 - 6.13]	0.0446	0.0005767	0	0.3894	PASS	4.41	PASS	5.91	1
1	20915716	9:116270817:G:A	RGS3	rs374278518	A	ADD	4453	2.71 [2.639 - 2.781]	0.01702	0	0	1	PASS	4.37	PASS	4.53	1
14	75580048	9:119204756:G:T	ASTN2	rs151278272	T	ADD	4453	2.01 [1.97 - 2.05]	0.02738	0	0	1	PASS	3.89	PASS	4.17	1
7	134880963	9:120475431:T:A	TLR4	rs5031050	A	ADD	4449	0.272 [0.261 - 0.2835]	0.04884	0.0005767	0.0007356	1	PASS	3.56	PASS	4.89	1
17	5998434	9:131502313:C:T	ZER1	rs150689943	T	ADD	4450	1.883 [1.846 - 1.922]	0.04754	0.0005767	0.0003678	1	PASS	5.62	PASS	4.18	1
4	155487045	9:131866548:T:C	CRAT	rs141970897	C	ADD	4438	1.784 [1.752 - 1.817]	0.04799	0	0.005149	0.001435	PASS	4.35	PASS	4.07	1
15	54307600	9:133374929:A:G	ASS1	rs145288815	G	ADD	4435	0.5244 [0.5143 - 0.5348]	0.03836	0.005767	0.002574	0.1324	PASS	5.23	PASS	5.91	1
8	20005574	9:135763825:G:A	C9orf9	rs142240079	A	ADD	4450	3.499 [3.389 - 3.611]	0.01329	0	0.0007356	0.5244	PASS	3.35	PASS	4.11	1
12	550052	9:139282004:C:T	SNAPC4	rs745823218	T	ADD	4453	0.1682 [0.1604 - 0.1765]	0.01936	0	0	1	PASS	4.63	PASS	4.97	1
8	66516661	9:139733850:C:T	RABL6	rs199908520	T	ADD	4438	1.709 [1.683 - 1.735]	0.02762	0.0005767	0.004781	0.01286	PASS	4.57	PASS	4.84	1
7	18067174	9:139841132:G:A	C8G	rs150744928	A	ADD	4448	4.115 [3.941 - 4.298]	0.04075	0	0.001471	0.1618	PASS	2.8	PASS	5.51	1
19	1796090	9:139910496:G:C	ABCA2	rs756365490	C	ADD	4450	3.279 [3.174 - 3.387]	0.02166	0.0005767	0.0003678	1	PASS	0.55	PASS	-0.7532	1
8	87151779	9:140622895:G:A	EHMT1	rs144871446	A	ADD	4453	0.3 [0.293 - 0.3071]	0.001311	0	0	1	PASS	5.01	PASS	6	1
18	198132	10:5788887:C:G	FAM208B	rs201764527	G	ADD	4450	0.4551 [0.445 - 0.4653]	0.02668	0	0.0007356	0.5244	PASS	6.37	PASS	4.42	1
2	175324602	10:7621839:T:C	ITIH5	rs374231705	C	ADD	4453	2.34 [2.282 - 2.399]	0.0333	0	0	1	PASS	2.49	PASS	4.88	1
15	41275221	10:7759650:G:A	ITIH2	rs138977046	A	ADD	4453	0.4927 [0.4821 - 0.5035]	0.04032	0	0	1	PASS	6.08	PASS	6.01	1
8	145542387	10:11805412:C:T	ECHDC3	rs199500563	T	ADD	4444	0.5502 [0.5405 - 0.56]	0.03473	0	0.002942	0.02636	PASS	3.7	PASS	3.76	1
10	98156951	10:25288415:C:T	ENKUR	rs151110282	T	ADD	4450	10.17 [9.495 - 10.89]	0.03369	0	0.0007356	0.5244	PASS	5.25	PASS	5.81	1
8	125463937	10:44053193:C:A	ZNF239	rs141168994	A	ADD	4453	2.233 [2.181 - 2.287]	0.03356	0	0	1	PASS	6.65	PASS	4.44	1
12	57424918	10:46122051:C:T	ZFAND4	rs80042909	T	ADD	4451	11.54 [10.78 - 12.36]	0.02553	0	0.0003678	1	PASS	2.97	PASS	4.33	1
6	36887436	10:46122195:A:T	ZFAND4	rs144142701	T	ADD	4453	5.106 [4.907 - 5.313]	0.009933	0	0	1	PASS	4.43	PASS	6.22	1
5	72359671	10:50732247:C:T	ERCC6	rs138865542	T	ADD	4453	2.979 [2.902 - 3.058]	0.00888	0	0	1	PASS	4.61	PASS	4.82	1
6	50803842	10:64573941:T:G	EGR2	rs202183386	G	ADD	4443	2.567 [2.509 - 2.626]	0.00905	0	0.00331	0.01482	PASS	4.46	PASS	5.04	1
6	158923669	10:69682849:G:C	HERC4	rs146887700	C	ADD	4447	2.903 [2.811 - 2.999]	0.03966	0.001153	0.001103	1	PASS	3.79	PASS	3.93	1
18	55992228	10:71021004:C:T	HKDC1	rs143285779	T	ADD	4451	3.498 [3.399 - 3.6]	0.006425	0	0.0003678	1	PASS	4.03	PASS	4.73	1
2	47273468	10:72298717:C:T	PALD1	rs149011748	T	ADD	4449	4.61 [4.412 - 4.816]	0.02865	0.0005767	0.0007356	1	PASS	5.31	PASS	5.74	1
4	8620163	10:72360291:C:T	PRF1	rs139336186	T	ADD	4423	0.4742 [0.4642 - 0.4844]	0.02771	0.00173	0.009562	0.000927	PASS	5.01	PASS	5.05	1
6	36343669	10:81070858:G:A	ZMIZ1	rs149174704	A	ADD	4451	0.3199 [0.3107 - 0.3295]	0.01496	0	0.0003678	1	PASS	5.38	PASS	5.84	1
18	76856627	10:87614376:C:A	GRID1	rs144486521	A	ADD	4449	0.4618 [0.4519 - 0.4719]	0.02505	0	0.001103	0.2865	PASS	5.19	PASS	5.32	0.1149
11	63994231	10:95400694:G:T	PDE6C	rs45522236	T	ADD	4449	1.921 [1.889 - 1.955]	0.01681	0.00173	0	0.05898	PASS	5.58	PASS	5.73	1
16	50733392	10:96336443:A:G	HELLS	rs200482346	G	ADD	4449	3.332 [3.222 - 3.445]	0.02368	0	0.001103	0.2865	PASS	4.79	PASS	4.73	1
19	18119524	10:101157438:G:C	GOT1	rs76850691	C	ADD	4450	4.973 [4.767 - 5.188]	0.0173	0.0005767	0.0003678	1	PASS	6.62	PASS	6.22	1
13	25894688	10:101165952:C:T	GOT1	rs146049867	T	ADD	4453	0.4902 [0.4791 - 0.5014]	0.04941	0	0	1	PASS	2.89	PASS	4.1	0.1102
8	145830957	10:104183907:G:A	CUEDC2	rs376316530	A	ADD	4442	0.1934 [0.1843 - 0.2029]	0.03159	0	0.003678	0.00848	PASS	6	PASS	6.51	1
6	88049969	10:115338424:C:T	HABP2	rs41292628	T	ADD	4449	1.927 [1.892 - 1.962]	0.02365	0.0005767	0.0007356	1	PASS	4.54	PASS	4.43	1
17	80399092	10:127414334:C:T	EDRF1	rs200782345	T	ADD	4453	0.3857 [0.379 - 0.3926]	0.0006899	0	0	1	PASS	5.87	PASS	5.82	1
6	44216403	10:127441421:A:G	EDRF1	rs201114554	G	ADD	4442	2.17 [2.123 - 2.218]	0.02686	0.00519	0.0003678	0.001323	PASS	4.16	PASS	6.21	1
13	32850682	10:129682013:G:A	CLRN3	rs749762195	A	ADD	4445	9.674 [9 - 10.4]	0.04879	0.004037	0	0.001348	PASS	2.63	PASS	4.45	1
11	788282	10:134261501:G:T	C10orf91	rs755332712	T	ADD	4442	3.703 [3.579 - 3.831]	0.01606	0.001153	0.002942	0.3335	PASS	1.27	PASS	1.51	1
1	59812068	11:281692:G:C	NLRP6	rs148388963	C	ADD	4450	2.773 [2.687 - 2.862]	0.04324	0	0.0007356	0.5244	PASS	2.6	PASS	5.99	1
19	24102847	11:551708:C:T	LRRC56	rs113929032	T	ADD	4425	2.223 [2.186 - 2.261]	0.003128	0.002307	0.008459	0.009349	PASS	4.4	PASS	6.52	1
21	45953755	11:3681309:G:A	ART1	rs138825846	A	ADD	4430	0.1107 [0.1037 - 0.1181]	0.03468	0	0.008459	1.408e-05	PASS	4.31	PASS	6.07	1
11	3681309	11:5717709:G:A	TRIM22	rs200668710	A	ADD	4453	0.6048 [0.5956 - 0.6141]	0.03942	0	0	1	PASS	4.32	PASS	3.86	0.3586
10	46965803	11:6432229:A:T	APBB1	rs148090907	T	ADD	4453	2.111 [2.065 - 2.158]	0.03326	0	0	1	PASS	5.89	PASS	5.55	1
1	7887454	11:10792183:A:C	CTR9	rs199735513	C	ADD	4390	1.574 [1.552 - 1.597]	0.04774	0.01557	0.01287	0.5123	PASS	2.1	PASS	2.27	1
20	1532601	11:12241903:G:A	MICAL2	rs147143035	A	ADD	4453	0.5173 [0.5079 - 0.5269]	0.0246	0	0	1	PASS	4.28	PASS	4.61	0.2154
8	17612562	11:17111340:T:C	PIK3C2A	rs139012235	C	ADD	4450	2.476 [2.407 - 2.547]	0.043	0.001153	0	0.1516	PASS	3.52	PASS	5.17	1
3	151166124	11:22291883:C:G	ANO5	rs146341538	G	ADD	4442	3.091 [2.99 - 3.195]	0.03238	0.00519	0.0003678	0.001323	PASS	3.25	PASS	5.24	1
3	77614215	11:44102798:G:C	ACCS	rs148926432	C	ADD	4453	5.419 [5.148 - 5.705]	0.03908	0	0	1	PASS	6.31	PASS	4.65	1
6	73043331	11:47188427:G:A	ARFGAP2	rs35950498	A	ADD	4446	1.731 [1.704 - 1.757]	0.02544	0.0005767	0.001839	0.4147	PASS	7.06	PASS	7.07	1
1	205904888	11:57505086:G:C	TMX2	rs143458458	C	ADD	4453	2.348 [2.288 - 2.41]	0.04005	0	0	1	PASS	3.88	PASS	5.22	1
9	5123006	11:57958038:C:T	OR9Q2	rs143165965	T	ADD	4451	2.389 [2.333 - 2.447]	0.02298	0	0.0003678	1	PASS	6.22	PASS	6.27	1
1	156907096	11:59573957:G:A	MRPL16	rs491671	A	ADD	4453	2.274 [2.228 - 2.321]	0.01199	0	0	1	PASS	5.21	PASS	4.96	1
14	51111661	11:59811030:A:T	OOSP2	rs199805174	T	ADD	4451	2.019 [1.981 - 2.059]	0.02245	0	0.0003678	1	PASS	3.88	PASS	3.92	1
2	157425466	11:61106630:G:A	DAK	rs780114599	A	ADD	4437	3.85 [3.702 - 4.004]	0.03059	0.001153	0.004781	0.05996	PASS	-0.9346	PASS	-0.0878	1
1	203134669	11:61511262:C:A	DAGLA	rs150806850	A	ADD	4449	7.146 [6.794 - 7.517]	0.01473	0.001153	0.0003678	0.5643	PASS	5.76	PASS	6.37	1
17	61574572	11:62344743:C:T	TUT1	rs117162358	T	ADD	4443	0.1703 [0.1624 - 0.1785]	0.01884	0.0005767	0.002942	0.1671	PASS	5.07	PASS	5.87	1
11	62344743	11:62469978:C:T	BSCL2	rs149412531	T	ADD	4451	0.5641 [0.5541 - 0.5742]	0.04386	0	0.0003678	1	PASS	3.67	PASS	4.14	1
9	12702283	11:62571313:C:T	NXF1	rs139794879	T	ADD	4447	1.403 [1.389 - 1.418]	0.04001	0.00173	0.0007356	0.384	PASS	5.08	PASS	5.27	0.667
1	157497650	11:62763248:G:A	SLC22A8	rs11568481	A	ADD	4448	0.4406 [0.4321 - 0.4492]	0.008127	0.001153	0.0007356	0.6453	PASS	6.84	PASS	6.85	1
12	47163218	11:64518016:G:A	PYGM	rs113806080	A	ADD	4453	0.1766 [0.1683 - 0.1854]	0.02468	0	0	1	PASS	4.77	PASS	5.26	1
6	170176757	11:64974282:C:T	CAPN1	rs150244086	T	ADD	4437	0.1582 [0.1507 - 0.166]	0.01658	0	0.005517	0.0008007	PASS	5.53	PASS	5.85	1
22	29726516	11:67075354:G:A	SSH3	rs61737055	A	ADD	4453	0.5375 [0.5273 - 0.5479]	0.04185	0	0	1	PASS	4.84	PASS	3.52	1
19	2987002	11:76255601:A:C	C11orf30	rs780165176	C	ADD	4453	2.783 [2.703 - 2.864]	0.02634	0	0	1	PASS	3.4	PASS	3.18	1
11	31447864	11:76804776:G:A	CAPN5	rs144453005	A	ADD	4442	0.2885 [0.2792 - 0.2981]	0.01696	0.0005767	0.00331	0.1001	PASS	0.969	PASS	1.74	1
3	135975431	11:100998682:A:C	PGR	rs199751131	C	ADD	4451	0.4522 [0.4411 - 0.4634]	0.04354	0	0.0003678	1	PASS	4.4	PASS	3.97	1
12	57110000	11:101857590:T:C	KIAA1377	rs7111429	C	ADD	4448	0.3697 [0.3598 - 0.3799]	0.02159	0.00173	0.0003678	0.306	PASS	7	PASS	7.07	1
11	94563337	11:103797657:C:T	PDGFD	rs151199614	T	ADD	4448	2.31 [2.267 - 2.353]	0.004642	0	0.001471	0.1618	PASS	5	PASS	5.02	0.1392
11	4661602	11:111431050:C:T	LAYN	rs114394665	T	ADD	4453	5.379 [5.1 - 5.673]	0.04755	0	0	1	PASS	6.89	PASS	6.93	1
16	23768875	11:116661001:G:A	APOA5	rs143292359	A	ADD	4451	0.4094 [0.3996 - 0.4195]	0.02142	0	0.0003678	1	PASS	6.18	PASS	5.8	1
16	50326666	11:118529702:C:T	TREH	rs202164923	T	ADD	4451	1.597 [1.574 - 1.621]	0.04985	0.0005767	0	0.3894	PASS	3.16	PASS	3.11	1
19	282274	11:123624553:C:T	OR6X1	rs140203672	T	ADD	4453	1.75 [1.726 - 1.775]	0.01129	0	0	1	PASS	6.03	PASS	4.66	0.3586
6	168443258	11:124845084:G:GA	CCDC15	rs775732179	GA	ADD	4283	0.3096 [0.3 - 0.3194]	0.01856	0.02307	0.04744	2.504e-05	PASS	1.27	PASS	2.2	1
3	63985157	11:125617616:G:A	PATE1	rs201049739	A	ADD	4453	4.306 [4.123 - 4.497]	0.03481	0	0	1	PASS	2.62	PASS	4.24	1
3	180680667	11:128844088:G:T	ARHGAP32	rs761102484	T	ADD	4453	2.26 [2.204 - 2.319]	0.04414	0	0	1	PASS	4.97	PASS	4.73	1
4	111469357	12:4881738:A:G	GALNT8	rs16931692	G	ADD	4450	5.416 [5.192 - 5.65]	0.01225	0.0005767	0.0003678	1	PASS	4.47	PASS	5.37	1
19	12876653	12:6458343:G:A	SCNN1A	rs148749888	A	ADD	4453	2.287 [2.243 - 2.331]	0.006483	0	0	1	PASS	4.96	PASS	6.7	0.1102
6	146275983	12:7640420:G:A	CD163	rs61729511	A	ADD	4451	0.3541 [0.3446 - 0.3639]	0.01693	0	0.0003678	1	PASS	6.52	PASS	5.05	1
1	10460609	12:10862595:T:G	YBX3	rs144215756	G	ADD	4432	3.369 [3.241 - 3.501]	0.04828	0.00519	0.004046	0.6478	PASS	1.79	PASS	1.84	1
6	146126397	12:14829843:G:A	GUCY2C	rs148946391	A	ADD	4434	4.959 [4.752 - 5.174]	0.01811	0.008074	0.001471	0.001051	PASS	4.07	PASS	4.4	1
1	57209853	12:21448681:C:G	SLCO1A2	rs145389298	G	ADD	4433	0.1078 [0.1009 - 0.1152]	0.03439	0.009227	0.001103	6.685e-05	PASS	1.38	PASS	2.15	1
2	114476839	12:40734202:G:A	LRRK2	rs34637584	A	ADD	4451	2.501 [2.461 - 2.541]	0.0003507	0.0005767	0	0.3894	PASS	5.83	PASS	6.79	1
5	76758927	12:43860593:C:T	ADAMTS20	rs200141152	T	ADD	4257	2.647 [2.581 - 2.715]	0.01615	0.03806	0.04744	0.1535	PASS	1.79	PASS	1.75	0.0405
10	87614376	12:46591791:C:T	SLC38A1	rs200881452	T	ADD	4451	3.051 [2.947 - 3.159]	0.04477	0	0.0003678	1	PASS	3.7	PASS	3.88	1
11	67200270	12:47163218:CA:C	SLC38A4	rs534784637	C	ADD	4441	1.926 [1.895 - 1.958]	0.01253	0.002307	0.002574	1	PASS	4.97	PASS	4.78	1
1	155167949	12:48272845:G:A	VDR	rs147496897	A	ADD	4451	2.978 [2.904 - 3.053]	0.006301	0	0.0003678	1	PASS	4.98	PASS	4.97	1
11	67254522	12:49177118:G:A	ADCY6	rs775408943	A	ADD	4445	3.043 [2.954 - 3.134]	0.01872	0.0005767	0.002207	0.2589	PASS	1.8	PASS	1.07	0.02119
2	61577409	12:49298191:G:T	CCDC65	rs371084552	T	ADD	4453	3.706 [3.566 - 3.852]	0.0336	0	0	1	PASS	1.57	PASS	2.87	1
12	14829843	12:50528474:G:A	CERS5	rs199588307	A	ADD	4433	0.4325 [0.4215 - 0.4439]	0.04212	0.0005767	0.00662	0.001539	PASS	2.43	PASS	2.18	1
22	44583650	12:53224014:A:G	KRT79	rs199591843	G	ADD	4453	0.2673 [0.2569 - 0.2782]	0.0378	0	0	1	PASS	1.96	PASS	1.86	1
3	160395379	12:53400287:G:T	EIF4B	rs367624532	T	ADD	4451	2.116 [2.067 - 2.167]	0.0472	0	0.0003678	1	PASS	3.63	PASS	5.52	1
4	84200153	12:55688939:G:GA	OR6C6	rs545296708	GA	ADD	4450	0.3522 [0.3456 - 0.3589]	0.0005012	0	0.0007356	0.5244	PASS	5.09	PASS	5.04	1
22	37964564	12:55820372:T:G	OR6C76	rs151017253	G	ADD	4451	0.3775 [0.3707 - 0.3845]	0.0008534	0.0005767	0	0.3894	PASS	4.64	PASS	4.78	1
5	75979027	12:56086993:C:T	ITGA7	rs144983062	T	ADD	4449	1.379 [1.366 - 1.391]	0.02583	0	0.001103	0.2865	PASS	4.08	PASS	5.8	0.3292
12	50528474	12:56234946:G:A	MMP19	rs145239368	A	ADD	4451	1.619 [1.594 - 1.644]	0.04928	0	0.0003678	1	PASS	6.32	PASS	6.36	1
16	50745102	12:56648021:C:T	ANKRD52	rs202238056	T	ADD	4453	1.647 [1.622 - 1.672]	0.03977	0	0	1	PASS	4.38	PASS	4.62	1
9	101990210	12:56863068:C:T	SPRYD4	rs117958275	T	ADD	4451	4.253 [4.069 - 4.445]	0.03995	0	0.0003678	1	PASS	5.43	PASS	5.17	1
17	41008306	12:57642937:T:C	STAC3	rs199716296	C	ADD	4451	3.681 [3.55 - 3.816]	0.02367	0	0.0003678	1	PASS	3	PASS	4.46	1
19	11891145	12:57662227:C:T	R3HDM2	rs201329941	T	ADD	4439	2.424 [2.37 - 2.48]	0.01459	0	0.004781	0.002615	PASS	4.22	PASS	5.88	1
3	180334341	12:72179344:C:A	RAB21	rs61754229	A	ADD	4450	0.357 [0.3456 - 0.3687]	0.04639	0.0005767	0.0003678	1	PASS	3.8	PASS	4.4	1
19	57326850	12:75706669:T:G	CAPS2	rs146909299	G	ADD	4450	0.4124 [0.4026 - 0.4224]	0.02034	0	0.0007356	0.5244	PASS	3.97	PASS	4.18	1
6	137814509	12:95451408:A:G	NR2C1	rs201894351	G	ADD	4450	0.3472 [0.3371 - 0.3575]	0.02354	0	0.0007356	0.5244	PASS	3.75	PASS	5.17	1
14	35593137	12:95456460:G:A	NR2C1	rs138215045	A	ADD	4453	2.332 [2.287 - 2.377]	0.005807	0	0	1	PASS	4.09	PASS	4.39	1
17	650114	12:109692110:G:A	ACACB	rs148572580	A	ADD	4444	6.869 [6.522 - 7.235]	0.01983	0.001153	0.002207	0.4952	PASS	6.7	PASS	6.64	1
19	6183185	12:109838926:G:T	MYO1H	rs200532551	T	ADD	4453	1.712 [1.683 - 1.741]	0.04677	0	0	1	PASS	6.27	PASS	6.43	1
11	61106630	12:110224531:G:A	TRPV4	rs145102919	A	ADD	4453	3.339 [3.236 - 3.445]	0.01538	0	0	1	PASS	1.96	PASS	3.22	1
22	37333972	12:110397738:T:C	GIT2	rs9804905	C	ADD	4453	0.198 [0.1888 - 0.2077]	0.03352	0	0	1	PASS	4.29	PASS	4.69	1
1	223568348	12:112165873:C:G	ACAD10	rs749480203	G	ADD	4453	7.467 [7.078 - 7.878]	0.01845	0	0	1	PASS	1.36	PASS	2.36	1
5	79854935	12:133291473:G:A	PGAM5	rs142758535	A	ADD	4453	0.2194 [0.209 - 0.2303]	0.04931	0	0	1	PASS	4.05	PASS	4.79	1
22	50893019	13:21331685:G:A	N6AMT2	rs200834598	A	ADD	4451	2.737 [2.659 - 2.817]	0.02813	0.0005767	0	0.3894	PASS	4.39	PASS	2.97	1
11	125617616	13:25894688:A:G	NUPL1	rs145009745	G	ADD	4435	0.11 [0.103 - 0.1174]	0.03491	0.008074	0.001103	0.0005405	PASS	2.07	PASS	3.7	0.01346
9	120475431	13:32850682:A:G	FRY	rs373478773	G	ADD	4450	5.163 [4.905 - 5.434]	0.0442	0.0005767	0.0003678	1	PASS	1.51	PASS	4.06	1
9	33120496	13:33859719:C:A	STARD13	rs372732938	A	ADD	4453	5.652 [5.358 - 5.962]	0.04204	0	0	1	PASS	5.28	PASS	5.77	1
15	65447268	13:42748189:C:T	DGKH	rs73187296	T	ADD	4436	1.673 [1.65 - 1.695]	0.01632	0.004614	0.002942	0.4428	PASS	5.36	PASS	5.37	1
10	44053193	13:42873889:C:T	AKAP11	rs200013198	T	ADD	4451	2.108 [2.059 - 2.159]	0.04858	0	0.0003678	1	PASS	2.66	PASS	5.85	1
19	2994911	13:58298905:C:G	PCDH17	rs144881046	G	ADD	4453	0.5434 [0.5333 - 0.5538]	0.04278	0	0	1	PASS	6.11	PASS	4.41	1
4	70504823	13:99087886:A:G	FARP1	rs150432830	G	ADD	4451	1.517 [1.498 - 1.536]	0.03939	0	0.0003678	1	PASS	6.01	PASS	6.06	1
19	14029571	14:20711060:TC:T	OR11H4	rs773830164	T	ADD	4451	6.091 [5.785 - 6.414]	0.02807	0	0.0003678	1	PASS	1.57	PASS	2.24	1
22	20128538	14:24029037:C:T	AP1G2	rs74849041	T	ADD	4450	2.882 [2.788 - 2.98]	0.04725	0	0.0007356	0.5244	PASS	4.93	PASS	5.13	1
2	220494903	14:24108198:C:T	DHRS2	rs2295908	T	ADD	4446	1.834 [1.8 - 1.868]	0.04117	0.001153	0.001471	1	PASS	6.77	PASS	7.18	1
1	234534142	14:35593137:C:T	KIAA0391	rs45626032	T	ADD	4451	0.1184 [0.1107 - 0.1266]	0.04658	0	0.0003678	1	PASS	3.22	PASS	4.97	1
1	15439009	14:50585317:C:A	SOS2	rs138133010	A	ADD	4453	2.543 [2.468 - 2.619]	0.04915	0	0	1	PASS	3.55	PASS	4.14	1
6	35704929	14:51111661:G:A	SAV1	rs757631264	A	ADD	4450	0.1814 [0.1728 - 0.1904]	0.02723	0	0.0007356	0.5244	PASS	1.3	PASS	1.65	1
19	18329148	14:55468812:T:A	WDHD1	rs138410771	A	ADD	4412	11.49 [10.71 - 12.32]	0.02931	0.009804	0.008459	0.6296	PASS	4.71	PASS	4.09	1
2	158978085	14:61446300:CTATT:C	TRMT5	rs755184077	C	ADD	4453	2.567 [2.5 - 2.635]	0.02489	0	0	1	PASS	3.23	PASS	3.57	1
9	37729853	14:71455317:G:A	PCNX	rs34655198	A	ADD	4453	11.97 [11.17 - 12.83]	0.02424	0	0	1	PASS	4.53	PASS	4.96	1
14	75330302	14:75530246:C:T	ACYP1	rs140497716	T	ADD	4442	2.113 [2.07 - 2.157]	0.02216	0	0.003678	0.00848	PASS	4.98	PASS	4.92	1
3	151165557	14:75580048:C:T	NEK9	rs144284031	T	ADD	4450	2.099 [2.057 - 2.142]	0.02215	0	0.0007356	0.5244	PASS	4.12	PASS	4.32	1
12	56086993	14:77297641:A:G	C14orf166B	rs200822356	G	ADD	4451	2.184 [2.15 - 2.219]	0.001911	0	0.0003678	1	PASS	4.18	PASS	3.4	1
6	43306002	14:77706888:G:A	TMEM63C	rs199846522	A	ADD	4446	0.1205 [0.1127 - 0.1287]	0.04524	0	0.002207	0.0879	PASS	3.56	PASS	3.98	1
9	33923983	14:95081380:CG:C	SERPINA3	rs764430806	C	ADD	4451	2.169 [2.117 - 2.222]	0.04401	0	0.0003678	1	PASS	3.89	PASS	5.64	1
15	72208780	14:95918606:C:T	SYNE3	rs554105607	T	ADD	4444	0.2389 [0.2296 - 0.2487]	0.02445	0	0.002942	0.02636	PASS	0.593	PASS	1.35	1
15	65667684	14:105209422:C:T	ADSSL1	rs756832498	T	ADD	4450	11.14 [10.41 - 11.92]	0.02544	0.0005767	0.0003678	1	PASS	0.925	PASS	2.57	1
9	4663252	15:34647819:G:A	NUTM1	rs111885943	A	ADD	4434	5.262 [4.998 - 5.541]	0.04344	0	0.00662	0.0002825	PASS	5.06	PASS	4.96	1
19	58324689	15:38234405:C:T	TMCO5A	rs780536640	T	ADD	4448	0.3148 [0.304 - 0.326]	0.03774	0.00173	0.0003678	0.306	PASS	3.11	PASS	3.81	1
8	125047645	15:39874561:G:A	THBS1	rs772463190	A	ADD	4453	2.892 [2.8 - 2.988]	0.04061	0	0	1	PASS	4.56	PASS	2.99	1
22	21073078	15:41275221:C:A	INO80	rs139929718	A	ADD	4453	0.2395 [0.2301 - 0.2493]	0.02565	0	0	1	PASS	-0.7877	PASS	0.111	1
6	131190965	15:42853561:T:C	HAUS2	rs151153391	C	ADD	4450	2.311 [2.269 - 2.353]	0.003748	0	0.0007356	0.5244	PASS	6	PASS	3.91	1
7	45007498	15:43571404:C:T	TGM7	rs140755102	T	ADD	4451	0.2539 [0.2454 - 0.2627]	0.0114	0.0005767	0	0.3894	PASS	3.22	PASS	3.98	1
1	36752844	15:43654069:C:A	ZSCAN29	rs138731321	A	ADD	4453	0.1252 [0.1172 - 0.1338]	0.04998	0	0	1	PASS	2.47	PASS	3.92	1
14	71455317	15:45457004:G:C	DUOX1	rs144461893	C	ADD	4453	0.441 [0.4311 - 0.4512]	0.02447	0	0	1	PASS	3.26	PASS	3.51	0.1149
21	45919751	15:45554220:C:T	SLC28A2	rs144302819	T	ADD	4453	13.02 [12.14 - 13.96]	0.02066	0	0	1	PASS	1.39	PASS	1.29	1
6	35837283	15:51749628:G:C	DMXL2	rs201450973	C	ADD	4450	2.22 [2.17 - 2.27]	0.02689	0.0005767	0.0003678	1	PASS	5.94	PASS	3.94	1
11	9424832	15:52622673:G:A	MYO5A	rs147898420	A	ADD	4451	0.6059 [0.5966 - 0.6153]	0.04132	0	0.0003678	1	PASS	5.21	PASS	5.05	1
9	136198803	15:54307600:C:T	UNC13C	rs372140182	T	ADD	4451	0.2964 [0.2861 - 0.3071]	0.03105	0	0.0003678	1	PASS	2.18	PASS	3.82	1
6	118791759	15:54786909:G:T	UNC13C	rs200464857	T	ADD	4436	0.124 [0.1161 - 0.1324]	0.04605	0.0005767	0.005517	0.007846	PASS	3.99	PASS	4.59	1
11	47827867	15:62238002:G:A	VPS13C	rs114089496	A	ADD	4449	12.94 [12.09 - 13.85]	0.01814	0.001153	0.0003678	0.5643	PASS	6.19	PASS	6.1	1
6	160858079	15:63948475:C:T	HERC1	rs201312041	T	ADD	4450	2.242 [2.188 - 2.297]	0.03697	0.001153	0	0.1516	PASS	4.87	PASS	4.82	1
8	105503097	15:64966530:G:A	ZNF609	rs200890644	A	ADD	4449	3.102 [2.993 - 3.215]	0.04701	0.0005767	0.0007356	1	PASS	2.17	PASS	4.33	1
10	115338424	15:65447268:A:G	CLPX	rs35754835	G	ADD	4453	4.997 [4.785 - 5.218]	0.01973	0	0	1	PASS	5.75	PASS	7.04	1
20	16348362	15:65450109:A:C	CLPX	rs151195584	C	ADD	4445	3.338 [3.245 - 3.434]	0.007642	0.00173	0.001471	1	PASS	2.73	PASS	2.63	1
12	58022914	15:66220799:C:T	MEGF11	rs137866207	T	ADD	4447	0.2571 [0.247 - 0.2677]	0.034	0.001153	0.001103	1	PASS	5.5	PASS	6.16	1
15	75968921	15:72208780:A:T	MYO9A	rs145540177	T	ADD	4438	0.5434 [0.5342 - 0.5527]	0.02403	0.006344	0.001103	0.003989	PASS	4.18	PASS	4.24	1
17	78188108	15:75045612:G:A	CYP1A2	rs56107638	A	ADD	4451	0.3828 [0.372 - 0.394]	0.0367	0	0.0003678	1	PASS	6.47	PASS	5.19	1
19	41787119	15:89169705:G:A	AEN	rs149883792	A	ADD	4447	2.15 [2.11 - 2.19]	0.009739	0	0.001839	0.1638	PASS	6.23	PASS	6.12	1
19	42343009	15:91795601:T:C	SV2B	rs145534909	C	ADD	4429	1.639 [1.617 - 1.663]	0.02754	0.0005767	0.008091	0.0003188	PASS	2.31	PASS	4.43	1
5	36985729	15:99796185:C:T	LRRC28	rs145009665	T	ADD	4453	0.3351 [0.3248 - 0.3457]	0.02803	0	0	1	PASS	3.85	PASS	4.11	0.04168
14	61446300	16:1259392:C:T	CACNA1H	rs141431881	T	ADD	4450	5.775 [5.481 - 6.086]	0.03567	0	0.0007356	0.5244	PASS	1.58	PASS	3.36	1
11	281692	16:1550125:A:G	TELO2	rs780829741	G	ADD	4432	5.477 [5.195 - 5.774]	0.04339	0.0005767	0.006988	0.0009122	PASS	0.57	PASS	0.382	1
16	84801966	16:2141776:T:TCCC	PKD1	rs201204878	TCCC	ADD	4421	1.471 [1.455 - 1.487]	0.02606	0.002884	0.009562	0.00886	PASS	4.21	PASS	4.37	0.6371
14	94849331	16:2333210:C:T	ABCA3	rs149871856	T	ADD	4448	0.5903 [0.5806 - 0.6002]	0.04715	0.0005767	0.001103	1	PASS	5.65	PASS	5.47	1
19	36616394	16:2578558:C:T	AMDHD2	rs778523768	T	ADD	4439	0.2112 [0.2012 - 0.2217]	0.04446	0.0005767	0.004413	0.02129	PASS	4.45	PASS	4.44	1
13	36006414	16:2816683:C:T	SRRM2	rs148774293	T	ADD	4453	0.2116 [0.2016 - 0.2221]	0.04476	0	0	1	PASS	4.55	PASS	3.31	1
19	22154829	16:3025632:G:A	PKMYT1	rs372008941	A	ADD	4441	9.361 [8.733 - 10.03]	0.04333	0	0.004046	0.00911	PASS	1.95	PASS	3.78	1
9	33464897	16:3487104:G:C	ZNF597	rs77055452	C	ADD	4451	2.837 [2.774 - 2.901]	0.003251	0	0.0003678	1	PASS	5.77	PASS	6.49	1
9	34657473	16:12875200:C:T	CPPED1	rs199747827	T	ADD	4451	0.2824 [0.2738 - 0.2914]	0.01079	0	0.0003678	1	PASS	3.31	PASS	3.92	1
2	228883868	16:23768875:C:T	CHP2	rs61731149	T	ADD	4451	3.625 [3.502 - 3.752]	0.01922	0.0005767	0	0.3894	PASS	5.67	PASS	5.73	1
3	135745716	16:27777733:G:A	KIAA0556	rs61730241	A	ADD	4451	2.35 [2.299 - 2.403]	0.01568	0	0.0003678	1	PASS	5	PASS	5.07	1
1	43895715	16:30594056:C:A	ZNF785	rs138958454	A	ADD	4408	8.054 [7.664 - 8.464]	0.008381	0.002884	0.01434	7.004e-05	PASS	4.64	PASS	3.63	1
1	207135705	16:31434770:C:T	ITGAD	rs150163548	T	ADD	4448	1.77 [1.738 - 1.802]	0.04694	0	0.001471	0.1618	PASS	6.03	PASS	6.31	1
17	2601266	16:47644751:A:T	PHKB	rs201217052	T	ADD	4444	0.1199 [0.1122 - 0.128]	0.0436	0	0.002942	0.02636	PASS	5.21	PASS	5.38	1
22	37494580	16:50326666:G:A	ADCY7	rs138459146	A	ADD	4453	3.919 [3.765 - 4.08]	0.0333	0	0	1	PASS	2.69	PASS	3.65	1
1	46743923	16:50744565:T:G	NOD2	rs104895423	G	ADD	4451	1.844 [1.812 - 1.876]	0.02564	0.0005767	0	0.3894	PASS	6.29	PASS	6.17	0.01015
16	89782895	16:50744892:A:C	NOD2	rs104895469	C	ADD	4453	1.933 [1.896 - 1.971]	0.03364	0	0	1	PASS	4.67	PASS	6.04	1
9	139910496	16:50745102:C:T	NOD2	rs766651775	T	ADD	4453	3.613 [3.478 - 3.752]	0.03353	0	0	1	PASS	5.62	PASS	4.82	1
1	75038603	16:50745656:G:A	NOD2	rs104895438	A	ADD	4453	3.345 [3.287 - 3.405]	1.683e-05	0	0	1	PASS	2.31	PASS	4.01	0.1982
8	38646251	16:50746086:C:T	NOD2	rs61747625	T	ADD	4450	3.899 [3.761 - 4.041]	0.01741	0	0.0007356	0.5244	PASS	2.75	PASS	5	1
16	89986432	16:53321892:A:G	CHD9	rs61754093	G	ADD	4451	0.3426 [0.3329 - 0.3526]	0.01967	0	0.0003678	1	PASS	3.56	PASS	4.75	1
1	111742274	16:58709875:C:T	SLC38A7	rs140010248	T	ADD	4447	3.16 [3.054 - 3.27]	0.03475	0	0.001839	0.1638	PASS	2.81	PASS	4.86	0.0152
17	33462424	16:67943505:G:A	PSKH1	rs201009210	A	ADD	4453	1.981 [1.941 - 2.023]	0.03682	0	0	1	PASS	6.28	PASS	6.35	1
5	9202334	16:71703205:T:C	PHLPP2	rs151177503	C	ADD	4453	1.725 [1.697 - 1.753]	0.03599	0	0	1	PASS	6.59	PASS	6.66	0.1982
14	21543930	16:74685979:G:T	RFWD3	rs148545931	T	ADD	4453	1.651 [1.628 - 1.675]	0.02912	0	0	1	PASS	4.8	PASS	4.46	1
6	127898374	16:74773946:C:T	FA2H	rs147632811	T	ADD	4453	2.812 [2.728 - 2.899]	0.03302	0	0	1	PASS	5.78	PASS	6.23	1
10	69682849	16:75646553:C:T	ADAT1	rs141222568	T	ADD	4453	3.754 [3.618 - 3.896]	0.02468	0	0	1	PASS	4.99	PASS	5.18	1
8	107773412	16:87678107:G:C	JPH3	rs144296512	C	ADD	4453	0.2693 [0.2587 - 0.2804]	0.04054	0	0	1	PASS	5.9	PASS	5.87	1
14	57938138	16:89782895:C:A	VPS9D1	rs199895191	A	ADD	4453	3.945 [3.779 - 4.119]	0.04625	0	0	1	PASS	1.79	PASS	2.91	1
19	31768178	17:650114:G:A	GEMIN4	rs140155001	A	ADD	4453	10.58 [9.882 - 11.33]	0.03028	0	0	1	PASS	5.27	PASS	5.72	1
5	96076976	17:4804104:C:T	CHRNE	rs140023380	T	ADD	4448	0.2935 [0.2849 - 0.3023]	0.009333	0	0.001471	0.1618	PASS	6.03	PASS	6.12	0.04787
16	71703205	17:5998434:C:T	WSCD1	rs201626716	T	ADD	4442	4.209 [4.023 - 4.403]	0.04603	0.00173	0.002574	0.7495	PASS	0.908	PASS	1.31	1
1	247150674	17:6329982:T:G	AIPL1	rs138585919	G	ADD	4453	0.2722 [0.2615 - 0.2834]	0.04196	0	0	1	PASS	2.45	PASS	3.65	1
2	20478586	17:7096379:G:A	DLG4	rs200038855	A	ADD	4450	3.156 [3.083 - 3.231]	0.002125	0	0.0007356	0.5244	PASS	1.95	PASS	2.49	0.0613
6	127469804	17:9586260:G:A	USP43	rs368273901	A	ADD	4450	0.4558 [0.4446 - 0.4674]	0.04847	0.0005767	0.0003678	1	PASS	5.45	PASS	5.68	1
10	85981788	17:10346811:G:A	MYH4	rs141666536	A	ADD	4453	3.207 [3.112 - 3.306]	0.0154	0	0	1	PASS	2.27	PASS	3.52	1
17	27228537	17:10404966:A:G	MYH1	rs151057376	G	ADD	4453	0.5173 [0.5077 - 0.527]	0.02672	0	0	1	PASS	1.64	PASS	3.18	1
6	38561973	17:15942832:C:T	NCOR1	rs139149781	T	ADD	4453	0.2527 [0.2424 - 0.2634]	0.03703	0	0	1	PASS	5.69	PASS	5.8	1
15	54786909	17:16331627:G:A	TRPV2	rs201142576	A	ADD	4453	3.944 [3.794 - 4.1]	0.02656	0	0	1	PASS	3.99	PASS	5.43	1
1	171301882	17:17698099:G:A	RAI1	rs200955853	A	ADD	4445	0.4008 [0.3894 - 0.4126]	0.04732	0	0.002574	0.04774	PASS	6.64	PASS	4.48	1
17	39991317	17:18284999:C:T	EVPLL	rs145935525	T	ADD	4453	0.08174 [0.0766 - 0.08721]	0.01545	0	0	1	PASS	5.76	PASS	2.71	1
22	29709864	17:26925964:T:C	SPAG5	rs145549199	C	ADD	4453	8.638 [8.224 - 9.072]	0.005871	0	0	1	PASS	4.11	PASS	3.99	1
1	19493697	17:33507648:C:T	UNC45B	rs199583516	T	ADD	4451	3.557 [3.443 - 3.674]	0.01456	0.0005767	0	0.3894	PASS	4.83	PASS	4.76	1
11	64518016	17:34912927:A:T	GGNBP2	rs773791954	T	ADD	4450	6.685 [6.35 - 7.037]	0.02042	0	0.0007356	0.5244	PASS	1.2	PASS	0.883	1
17	4449228	17:38140605:C:G	PSMD3	rs201112076	G	ADD	4453	0.1459 [0.139 - 0.1532]	0.0126	0	0	1	PASS	4.25	PASS	5.15	1
3	10331519	17:39280070:C:T	KRTAP4-12	rs200657918	T	ADD	4352	3.392 [3.27 - 3.519]	0.0372	0.01211	0.02905	0.0001603	PASS	0.397	PASS	-0.5407	1
6	2678532	17:39991317:C:T	NT5C3B	rs183919025	T	ADD	4451	1.746 [1.722 - 1.771]	0.01188	0.0005767	0	0.3894	PASS	4.93	PASS	4.79	1
2	37455579	17:41597494:C:A	DHX8	rs199626884	A	ADD	4451	0.4551 [0.4444 - 0.4661]	0.03871	0	0.0003678	1	PASS	6.45	PASS	4.84	1
2	29169337	17:42552252:T:A	GPATCH8	rs200764854	A	ADD	4443	4.172 [3.991 - 4.36]	0.04262	0	0.00331	0.01482	PASS	3.86	PASS	2.83	1
17	34912927	17:42818710:T:G	DBF4B	rs201168047	G	ADD	4453	0.3471 [0.3378 - 0.3567]	0.01513	0	0	1	PASS	4.65	PASS	2.55	1
1	77987594	17:48548419:G:A	ACSF2	rs142467151	A	ADD	4453	0.7009 [0.6936 - 0.7083]	0.03355	0	0	1	PASS	4.59	PASS	4.64	0.4243
11	64037726	17:49350738:A:G	UTP18	rs199983161	G	ADD	4447	2.879 [2.793 - 2.968]	0.02911	0.00173	0.0007356	0.384	PASS	3.08	PASS	4.02	1
12	133291473	17:56682456:C:T	TEX14	rs374317729	T	ADD	4451	2.275 [2.217 - 2.334]	0.04511	0.0005767	0	0.3894	PASS	2.14	PASS	4.04	1
19	47883126	17:60106962:G:C	MED13	rs767313099	C	ADD	4453	7.023 [6.675 - 7.389]	0.01614	0	0	1	PASS	0.379	PASS	2.91	1
13	21331685	17:62038602:T:C	SCN4A	rs187401185	C	ADD	4451	0.3457 [0.3357 - 0.3559]	0.02231	0	0.0003678	1	PASS	6.23	PASS	6.74	1
1	156144971	17:63156655:C:G	RGS9	rs201997888	G	ADD	4453	0.1826 [0.1741 - 0.1916]	0.02651	0	0	1	PASS	5.91	PASS	4.55	1
6	17602890	17:66352836:G:A	ARSG	rs186474907	A	ADD	4453	2.394 [2.328 - 2.462]	0.04922	0	0	1	PASS	4.71	PASS	4.47	1
14	100826952	17:72249949:G:A	TTYH2	rs142400517	A	ADD	4453	2.21 [2.157 - 2.265]	0.04118	0	0	1	PASS	4.41	PASS	5.19	1
2	167262631	17:72791688:G:A	TMEM104	rs137958832	A	ADD	4453	0.3584 [0.3469 - 0.3702]	0.04796	0	0	1	PASS	4.35	PASS	5.26	1
16	16248791	17:72938044:G:A	OTOP3	rs200244975	A	ADD	4443	2.754 [2.669 - 2.843]	0.04454	0	0.00331	0.01482	PASS	5.08	PASS	5.14	1
17	72938044	17:73870965:C:T	TRIM47	rs146859906	T	ADD	4453	0.2144 [0.2041 - 0.2252]	0.04877	0	0	1	PASS	4.59	PASS	4.64	1
11	76255601	17:74387071:C:A	UBE2O	rs376734404	A	ADD	4440	4.148 [3.985 - 4.318]	0.02592	0	0.004413	0.004847	PASS	1.8	PASS	3.06	1
19	3179521	17:76399916:A:G	PGS1	rs145352765	G	ADD	4447	1.602 [1.579 - 1.625]	0.03896	0	0.001839	0.1638	PASS	3.88	PASS	3.35	1
20	33328754	17:80399092:A:C	HEXDC	rs201679634	C	ADD	4448	0.3168 [0.3061 - 0.3278]	0.03594	0.0005767	0.001103	1	PASS	3.42	PASS	3.42	1
12	124421759	18:198132:C:T	USP14	rs146959256	T	ADD	4436	3.685 [3.544 - 3.831]	0.03617	0.00173	0.004781	0.1246	PASS	3.74	PASS	4.15	1
4	104079464	18:21083647:C:A	C18orf8	rs112277818	A	ADD	4429	1.881 [1.846 - 1.917]	0.03638	0.009804	0.002207	0.0008728	PASS	2.57	PASS	2.6	1
9	139841132	18:21437830:C:T	LAMA3	rs746123848	T	ADD	4453	6.105 [5.791 - 6.437]	0.0321	0	0	1	PASS	2.63	PASS	2.63	1
6	170597327	18:22805073:G:C	ZNF521	rs114102095	C	ADD	4451	0.2583 [0.2476 - 0.2694]	0.04475	0	0.0003678	1	PASS	6.22	PASS	4.6	1
11	5528856	18:47918555:C:T	SKA1	rs140749174	T	ADD	4443	4.177 [3.993 - 4.37]	0.04645	0.0005767	0.002942	0.1671	PASS	5.58	PASS	5.67	1
3	61548022	18:48252498:G:A	MAPK4	rs199859025	A	ADD	4453	2.054 [2.021 - 2.088]	0.005513	0	0	1	PASS	6.25	PASS	5.03	1
1	207073701	18:55992228:C:T	NEDD4L	rs376332407	T	ADD	4435	4.861 [4.649 - 5.082]	0.02616	0.0005767	0.005885	0.004518	PASS	1.37	PASS	2.37	1
12	68715231	18:61647170:C:T	SERPINB8	rs150067519	T	ADD	4448	6.74 [6.401 - 7.098]	0.02057	0.001153	0.0007356	0.6453	PASS	4.63	PASS	6.24	1
11	85365107	18:74091534:C:T	ZNF516	rs61733594	T	ADD	4449	1.841 [1.808 - 1.875]	0.03533	0.0005767	0.0007356	1	PASS	5.38	PASS	5.3	0.1342
1	151006406	18:76856627:G:C	ATP9B	rs144519079	C	ADD	4434	1.856 [1.825 - 1.888]	0.02267	0.0005767	0.006252	0.002623	PASS	6.24	PASS	6.08	1
9	139733850	19:1796090:C:T	ATP8B3	rs375729344	T	ADD	4448	11.38 [10.6 - 12.21]	0.03007	0	0.001471	0.1618	PASS	4.21	PASS	4.5	1
14	23450639	19:2987002:A:T	TLE6	rs772084741	T	ADD	4434	5.518 [5.245 - 5.805]	0.03483	0	0.00662	0.0002825	PASS	2.39	PASS	-0.1857	1
22	21119148	19:3179521:G:A	S1PR4	rs199573940	A	ADD	4422	3.545 [3.42 - 3.674]	0.02674	0.0005767	0.01067	1.212e-05	PASS	1.75	PASS	3.52	1
1	160136352	19:6013084:C:T	RFX2	rs78767825	T	ADD	4398	0.3174 [0.3077 - 0.3275]	0.02119	0.00519	0.01655	0.0006105	PASS	6.23	PASS	3.94	1
12	57642937	19:6183185:C:A	ACSBG2	rs149994638	A	ADD	4453	1.832 [1.801 - 1.863]	0.02551	0	0	1	PASS	4.77	PASS	4.67	0.165
19	41220218	19:9204530:G:A	OR1M1	rs199800381	A	ADD	4453	2.683 [2.604 - 2.764]	0.03775	0	0	1	PASS	2.04	PASS	2.77	1
17	72888801	19:10395877:C:T	ICAM1	rs142682313	T	ADD	4448	0.4322 [0.4248 - 0.4397]	0.002281	0	0.001471	0.1618	PASS	1.99	PASS	3.47	1
22	43204801	19:11231164:G:A	LDLR	rs140731590	A	ADD	4451	2.431 [2.369 - 2.495]	0.03112	0.0005767	0	0.3894	PASS	2.86	PASS	4.13	1
1	204378906	19:11305178:C:T	KANK2	rs139512726	T	ADD	4451	0.4723 [0.4628 - 0.4821]	0.02169	0	0.0003678	1	PASS	1.89	PASS	3.35	1
6	35454343	19:11891145:A:G	ZNF441	rs144102390	G	ADD	4453	1.697 [1.673 - 1.722]	0.02011	0	0	1	PASS	3.3	PASS	5.34	0.3393
20	29960701	19:12800595:C:T	FBXW9	rs147127517	T	ADD	4447	0.3827 [0.3729 - 0.3927]	0.0199	0	0.001839	0.1638	PASS	4.93	PASS	6.36	1
3	72897421	19:12876653:A:G	HOOK2	rs201762213	G	ADD	4427	0.1176 [0.1101 - 0.1256]	0.04103	0.0005767	0.008827	0.0001044	PASS	3.78	PASS	6.38	1
18	74091534	19:12975999:G:A	MAST1	rs200207566	A	ADD	4434	0.3585 [0.3494 - 0.3679]	0.01262	0.001153	0.005885	0.01459	PASS	4.19	PASS	4.56	1
2	32842895	19:14029571:C:A	CC2D1A	rs765282375	A	ADD	4432	0.2659 [0.2569 - 0.2753]	0.01632	0.0005767	0.006988	0.0009122	PASS	0.394	PASS	0.651	1
17	41955336	19:15760012:G:GA	CYP4F3	rs777863550	GA	ADD	4453	4.144 [3.978 - 4.317]	0.0291	0	0	1	PASS	3.51	PASS	2.79	1
9	18829865	19:15760014:C:A	CYP4F3	rs200295460	A	ADD	4453	4.144 [3.978 - 4.317]	0.0291	0	0	1	PASS	2.45	PASS	1.86	1
4	113353311	19:16495999:A:C	EPS15L1	rs577517420	C	ADD	4453	13.01 [12.12 - 13.97]	0.02328	0	0	1	PASS	0.999	PASS	2.07	1
4	113353433	19:18119524:C:CG	ARRDC2	rs761759708	CG	ADD	4451	0.1033 [0.09662 - 0.1105]	0.03399	0.0005767	0	0.3894	PASS	5.09	PASS	5.55	1
12	112186211	19:18180497:C:T	IL12RB1	rs200811721	T	ADD	4451	2.04 [1.996 - 2.084]	0.03954	0	0.0003678	1	PASS	3.69	PASS	3.73	1
1	64608090	19:19609360:C:A	GATAD2A	rs202109702	A	ADD	4448	0.3263 [0.3152 - 0.3379]	0.04354	0.0005767	0.001103	1	PASS	2.64	PASS	5.82	1
2	173913329	19:24102847:G:A	ZNF726	rs770891860	A	ADD	4437	3.518 [3.396 - 3.644]	0.02537	0.008074	0.0003678	1.709e-05	PASS	4.98	PASS	4.31	1
2	203329675	19:31768178:C:T	TSHZ3	rs199794016	T	ADD	4453	0.4274 [0.4171 - 0.438]	0.0294	0	0	1	PASS	6.18	PASS	6.44	1
12	110397738	19:35232488:T:C	ZNF181	rs201950342	C	ADD	4447	4.542 [4.35 - 4.743]	0.02839	0.002307	0.0003678	0.07903	PASS	0.839	PASS	-0.3909	1
9	12821754	19:35250996:C:T	ZNF599	rs149040820	T	ADD	4453	5.74 [5.443 - 6.054]	0.03957	0	0	1	PASS	5.91	PASS	6.16	1
12	95879681	19:37382668:T:C	ZNF829	rs370987908	C	ADD	4451	4.239 [4.051 - 4.435]	0.04517	0	0.0003678	1	PASS	5.97	PASS	5.64	1
15	63948475	19:40886610:C:G	HIPK4	rs148849368	G	ADD	4450	1.67 [1.644 - 1.697]	0.04405	0	0.0007356	0.5244	PASS	5.81	PASS	5.99	1
14	55468812	19:42192030:C:A	CEACAM7	rs141024482	A	ADD	4439	0.5436 [0.5334 - 0.5541]	0.04442	0.002884	0.002942	1	PASS	4.07	PASS	4.4	1
4	113505203	19:43968565:A:C	LYPD3	rs372044482	C	ADD	4449	17.25 [16.04 - 18.56]	0.01447	0.00173	0	0.05898	PASS	1.2	PASS	3.43	1
11	46401108	19:43990841:C:T	PHLDB3	rs374510252	T	ADD	4450	17.17 [15.96 - 18.47]	0.01464	0	0.0007356	0.5244	PASS	1.87	PASS	3.14	1
2	47277182	19:46307592:G:C	RSPH6A	rs144552615	C	ADD	4450	0.4773 [0.4672 - 0.4875]	0.02961	0	0.0007356	0.5244	PASS	3.5	PASS	3.33	1
19	56423892	19:46973026:C:A	PNMAL1	rs45532538	A	ADD	4437	2.559 [2.501 - 2.619]	0.01012	0.00173	0.004413	0.1852	PASS	2.74	PASS	6.15	1
11	12241903	19:47207846:G:A	PRKD2	rs144404837	A	ADD	4440	1.884 [1.848 - 1.92]	0.0362	0.002884	0.002574	1	PASS	6.3	PASS	5.64	1
17	17698099	19:47883126:C:T	DHX34	rs151213663	T	ADD	4446	0.4301 [0.4196 - 0.4408]	0.0315	0	0.002207	0.0879	PASS	4.24	PASS	4.28	1
14	77706888	19:48863385:C:A	TMEM143	rs143735444	A	ADD	4450	1.858 [1.822 - 1.894]	0.04324	0.0005767	0.0003678	1	PASS	2.92	PASS	4.66	1
9	116151795	19:50979486:G:C	FAM71E1	rs148246051	C	ADD	4444	4.801 [4.592 - 5.018]	0.02647	0.0005767	0.002574	0.1611	PASS	4.55	PASS	5.08	1
6	116442897	19:53454022:T:C	ZNF816	rs200988588	C	ADD	4453	0.09087 [0.08519 - 0.09692]	0.01965	0	0	1	PASS	6.36	PASS	4.22	1
9	37744565	19:54313709:A:G	NLRP12	rs199985574	G	ADD	4453	2.547 [2.478 - 2.618]	0.03344	0	0	1	PASS	6	PASS	5.71	1
1	1559292	19:55624058:A:T	PPP1R12C	rs139315383	T	ADD	4448	1.773 [1.743 - 1.803]	0.032	0.0005767	0.001103	1	PASS	5.49	PASS	6.1	1
15	34647819	19:55889018:G:T	TMEM190	rs373397928	T	ADD	4440	5.691 [5.385 - 6.013]	0.04798	0	0.004413	0.004847	PASS	2.5	PASS	3.61	1
1	200583514	19:57326850:T:C	PEG3	rs149044578	C	ADD	4450	4.412 [4.224 - 4.608]	0.03238	0	0.0007356	0.5244	PASS	6.45	PASS	5.48	1
12	109838926	19:57665821:AG:A	DUXA	rs151293806	A	ADD	4449	2.799 [2.711 - 2.89]	0.04279	0.0005767	0.0007356	1	PASS	5.75	PASS	6.29	1
2	54848533	19:58324689:C:A	ZNF552	rs45441999	A	ADD	4453	0.2063 [0.1984 - 0.2144]	0.0109	0	0	1	PASS	-0.4871	PASS	-0.7747	1
2	239147730	19:58640281:A:C	ZNF329	rs201669116	C	ADD	4453	2.545 [2.502 - 2.589]	0.0005917	0	0	1	PASS	5.8	PASS	6.3	0.1813
19	19609360	19:58640747:T:G	ZNF329	rs151088759	G	ADD	4451	0.5507 [0.541 - 0.5606]	0.03585	0	0.0003678	1	PASS	5.8	PASS	6.25	1
4	154624709	19:59074607:G:A	MZF1	rs146251309	A	ADD	4272	0.3432 [0.3325 - 0.3542]	0.03368	0.03403	0.04487	0.08661	PASS	2.16	PASS	3.01	1
19	40957359	20:1115796:G:A	PSMF1	rs144643969	A	ADD	4449	4.373 [4.185 - 4.57]	0.03575	0.0005767	0.0007356	1	PASS	1.81	PASS	2.18	1
1	3672066	20:1532601:C:T	RP4-576H24.4	rs142835461	T	ADD	4450	5.297 [5.103 - 5.5]	0.005298	0.0005767	0.0003678	1	PASS	5.4	PASS	5.81	1
7	47851578	20:15967795:G:A	MACROD2	rs147212262	A	ADD	4427	10.98 [10.18 - 11.85]	0.04786	0.00346	0.006988	0.1513	PASS	1.72	PASS	2.67	1
11	6414519	20:23666587:C:T	CST4	rs201023151	T	ADD	4442	0.2898 [0.2825 - 0.2972]	0.002303	0.005767	0	7.89e-05	PASS	1.59	PASS	-0.4129	1
7	99802331	20:29960701:T:C	DEFB118	rs140456274	C	ADD	4453	0.5872 [0.5777 - 0.5968]	0.04029	0	0	1	PASS	5.91	PASS	6.29	1
1	17292323	20:31379479:G:A	DNMT3B	rs145632647	A	ADD	4451	0.6141 [0.6046 - 0.6237]	0.04933	0	0.0003678	1	PASS	3.46	PASS	4.3	1
16	30740752	20:33517379:C:T	GSS	rs146267300	T	ADD	4453	2.51 [2.448 - 2.574]	0.02165	0	0	1	PASS	2.67	PASS	4.49	1
4	87656789	20:33539651:GC:G	GSS	rs752560204	G	ADD	4451	1.964 [1.923 - 2.005]	0.04282	0	0.0003678	1	PASS	3.19	PASS	3.64	1
19	47653505	20:39831923:C:T	ZHX3	rs556517517	T	ADD	4453	6.281 [5.958 - 6.622]	0.02929	0	0	1	PASS	1.1	PASS	1.07	1
2	167060594	20:44528279:C:T	PLTP	rs145642115	T	ADD	4453	0.4393 [0.4322 - 0.4466]	0.001668	0	0	1	PASS	1.55	PASS	1.65	0.006272
10	104183907	20:44530943:G:A	PLTP	rs6065903	A	ADD	4448	0.6076 [0.6 - 0.6152]	0.01251	0.0005767	0.001103	1	PASS	6.15	PASS	6.17	0.06247
1	45271740	20:45717943:C:T	EYA2	rs36002838	T	ADD	4450	2.153 [2.103 - 2.205]	0.04223	0.001153	0	0.1516	PASS	2.6	PASS	5.02	1
1	20224085	20:49354499:G:A	PARD6B	rs142377445	A	ADD	4447	1.897 [1.864 - 1.929]	0.01885	0.001153	0.001103	1	PASS	5.81	PASS	6.23	1
6	47252045	20:56136601:T:C	PCK1	rs202197769	C	ADD	4453	3.146 [3.036 - 3.261]	0.0445	0	0	1	PASS	5.53	PASS	3.39	1
1	16380180	20:58514536:T:G	PPP1R3D	rs774322736	G	ADD	4449	6.171 [5.913 - 6.44]	0.007553	0	0.001103	0.2865	PASS	1.95	PASS	1.5	1
7	100071904	20:60970036:C:T	CABLES2	rs141752965	T	ADD	4448	0.3155 [0.3043 - 0.3271]	0.04503	0.0005767	0.001103	1	PASS	1.73	PASS	1.49	1
1	155205563	20:61340732:C:T	NTSR1	rs34257083	T	ADD	4431	0.0756 [0.07083 - 0.08068]	0.01288	0	0.007723	4.435e-05	PASS	3.87	PASS	4.32	1
11	408876	20:61340774:C:T	NTSR1	rs11698783	T	ADD	4432	0.1305 [0.1245 - 0.1368]	0.00664	0	0.007356	8.078e-05	PASS	5.02	PASS	7.03	1
2	107459839	21:15599567:G:A	RBM11	rs61733445	A	ADD	4443	0.4331 [0.4232 - 0.4432]	0.02296	0.002307	0.001839	0.7427	PASS	2.6	PASS	-0.3186	1
11	62571313	21:38600107:C:T	DSCR3	rs370860276	T	ADD	4445	2.458 [2.391 - 2.527]	0.04162	0.00173	0.001471	1	PASS	1.92	PASS	4.51	1
1	6214791	21:41160099:C:A	IGSF5	rs139012406	A	ADD	4319	0.329 [0.3176 - 0.3408]	0.04765	0.03403	0.02722	0.2065	PASS	2.44	PASS	2.69	1
1	6185245	21:43733628:C:T	TFF3	rs118095917	T	ADD	4418	2.264 [2.207 - 2.322]	0.04434	0.01269	0.004413	0.002497	PASS	3.65	PASS	4.68	1
4	5620263	21:43771047:T:G	TFF2	rs116946921	G	ADD	4450	2.26 [2.203 - 2.318]	0.04495	0.0005767	0.0003678	1	PASS	6.16	PASS	5.23	1
17	72249949	21:44480591:G:A	CBS	rs117687681	A	ADD	4450	1.903 [1.873 - 1.935]	0.01312	0	0.0007356	0.5244	PASS	3.13	PASS	4.16	0.01985
1	197297642	21:45746614:G:A	PFKL	rs140555552	A	ADD	4434	0.5235 [0.5133 - 0.534]	0.03978	0.004037	0.004046	1	PASS	5.62	PASS	5.44	1
12	29689128	22:18305797:C:T	MICAL3	rs1076488	T	ADD	4451	1.644 [1.621 - 1.668]	0.02769	0	0.0003678	1	PASS	4.21	PASS	4.84	1
17	2808648	22:20128538:G:A	ZDHHC8	rs200070367	A	ADD	4427	3.298 [3.189 - 3.411]	0.02561	0.008651	0.003678	0.03867	PASS	6	PASS	4.98	1
14	20389141	22:21119148:T:C	PI4KA	rs61752244	C	ADD	4449	2.884 [2.79 - 2.98]	0.04316	0.001153	0.0003678	0.5643	PASS	5.77	PASS	5.66	1
4	89034471	22:24037193:A:T	RGL4	rs8137247	T	ADD	4453	2.257 [2.201 - 2.315]	0.04334	0	0	1	PASS	4.22	PASS	4.33	0.03876
22	50901349	22:24916367:GC:G	UPB1	rs753089725	G	ADD	4451	10.96 [10.16 - 11.82]	0.0473	0	0.0003678	1	PASS	1.73	PASS	1.05	1
2	141597653	22:24984275:G:A	FAM211B	rs114324143	A	ADD	4448	1.608 [1.585 - 1.631]	0.03799	0.00173	0.0003678	0.306	PASS	4.76	PASS	4.96	0.3075
22	24916367	22:26887598:TC:T	SRRD	rs756605538	T	ADD	4453	3.012 [2.932 - 3.094]	0.01001	0	0	1	PASS	3.4	PASS	5.46	1
10	95400694	22:29709864:A:ATGCGC	RASL10A	rs780460047	ATGCGC	ADD	4449	0.3842 [0.3729 - 0.3959]	0.04452	0.001153	0.0003678	0.5643	PASS	1.13	PASS	0.995	1
16	75513071	22:29726516:C:A	AP1B1	rs143578268	A	ADD	4440	0.1148 [0.1075 - 0.1226]	0.03949	0.0005767	0.004046	0.03553	PASS	2.33	PASS	5.66	1
7	142638356	22:31091347:C:T	OSBP2	rs150763805	T	ADD	4453	0.1257 [0.1178 - 0.1342]	0.04633	0	0	1	PASS	4.01	PASS	4.14	1
2	209036753	22:32439369:T:C	SLC5A1	rs139760182	C	ADD	4450	2.652 [2.579 - 2.727]	0.0291	0	0.0007356	0.5244	PASS	5.85	PASS	6.24	1
16	1550125	22:37333972:GC:G	CSF2RB	rs568607741	G	ADD	4448	1.484 [1.471 - 1.498]	0.006549	0	0.001471	0.1618	PASS	2.54	PASS	4.89	0.5219
12	50191125	22:37494580:G:A	TMPRSS6	rs139563689	A	ADD	4451	0.3288 [0.3175 - 0.3406]	0.04716	0.0005767	0	0.3894	PASS	1.73	PASS	2.35	1
1	218458718	22:37770469:C:T	ELFN2	rs202156863	T	ADD	4440	0.5622 [0.552 - 0.5726]	0.04949	0	0.004413	0.004847	PASS	5.79	PASS	6.37	1
6	73934037	22:41735060:G:A	ZC3H7B	rs145926085	A	ADD	4438	0.4778 [0.467 - 0.4888]	0.0418	0.00173	0.004046	0.2722	PASS	1.87	PASS	2.67	1
9	990856	22:50655707:C:T	SELO	rs372550959	T	ADD	4435	1.687 [1.661 - 1.714]	0.03655	0.0005767	0.006252	0.002623	PASS	5.79	PASS	6.14	1
12	49312681
5	112116562
16	3025632
2	103236441
6	89977816
10	63999515
4	1730262
1	63307109
1	156702216
15	68612629
12	113355387
16	613959
15	63948288
6	5002438
14	50585317
19	46307592
11	62649421
19	10244366
16	460358
5	109181636
2	61463469
7	94917985
7	1523407
17	72368101
14	24029037
5	121799237
17	4495663
18	47918555
1	6639073
2	166769021
9	34250736
16	2578558
6	135513614
3	38006111
3	179448047
11	494958
16	2816683
15	86118415
7	36657926
12	48272845
1	26520354
1	16073454
5	140751537
17	17131370
14	67864384
6	26020892
9	32631781
2	207564891
6	90333624
9	131502313
9	114356542
5	118485270
3	12977230
14	96781513
12	53400287
2	242501804
5	140603105
3	167184888
1	173703412
3	113303574
11	46403907
19	19356272
15	45408836
17	10360828
17	34310908
1	156108511
1	160325722
15	45408056
16	2333210
11	76804776
12	56642599
7	47408073
20	2842455
11	75316901
2	105959472
17	36478478
2	232209772
2	79254988
4	80328252
1	206653876
11	57102097
1	165513540
7	107689771
1	204226851
1	21896823
19	42192030
1	153791328
6	76024713
14	78174305
20	15967795
1	159752046
5	118574726
19	6362526
7	98987580
7	37924000
14	37283145
12	32135673
11	62446003
1	12383802
15	79089098
7	36429635
11	125301062
1	209807809
8	67926763
3	128181772
11	128844088
4	169143032
17	40344316
1	100661842
19	16687694
17	8722448
11	12376358
4	3445858
12	57431366
16	31434770
14	94953823
3	183097166
16	71682803
17	26712165
19	6013084
5	74137405
1	19503157
16	14702916
17	41955315
17	73489958
11	829476
6	142691705
20	60989164
15	68599976
2	97275288
4	8602900
16	89613145
17	42398536
1	159752016
15	45401767
10	97987234
2	17898147
16	11935605
3	169557891
22	38343321
2	175301065
4	129131153
5	176948982
19	50979486
16	53321892
17	6329982
17	37118192
14	103969503
11	65423186
10	135125279
1	205901061
6	116559406
12	133238159
18	29126642
1	162824691
21	45746614
17	4455911
17	34106078
13	58298905
22	37770469
2	217542860
19	23837109
12	123082285
14	95030154
5	41161898
17	4436698
7	107596043
11	124766846
18	28714069
20	39977407
19	41822637
6	56918076
11	17517160
13	96242564
3	52433643
5	94784021
4	8472874
19	59074607
1	154996385
17	40734156
1	236995258
13	42873889
1	38287837
12	99640096
22	50714320
6	118635315

## Sheet: Supplementary Table 5
Supplementary Table 5. List of known IBD-related genes used for gene prioritizations and pathway analyses
Genes	Source
LRRK2	H Huang, Nature, 2017, PMID: 28658209
NOD2	H Huang, Nature, 2017, PMID: 28658209
HNF4A	H Huang, Nature, 2017, PMID: 28658209
IL2RA	H Huang, Nature, 2017, PMID: 28658209
RTEL1-TNFRSF6B	H Huang, Nature, 2017, PMID: 28658209
EBF1	H Huang, Nature, 2017, PMID: 28658209
CARD9	H Huang, Nature, 2017, PMID: 28658209
IFIH1	H Huang, Nature, 2017, PMID: 28658209
IKZF1	H Huang, Nature, 2017, PMID: 28658209
GPR35	H Huang, Nature, 2017, PMID: 28658209
NKX2-3	H Huang, Nature, 2017, PMID: 28658209
SMAD3	H Huang, Nature, 2017, PMID: 28658209
JAK2	H Huang, Nature, 2017, PMID: 28658209
IL23R	H Huang, Nature, 2017, PMID: 28658209
PRDM1	H Huang, Nature, 2017, PMID: 28658209
CD48	L Jostins, Nature, 2012, PMID: 23128233
FCGR2A	L Jostins, Nature, 2012, PMID: 23128233
FCGR2B	L Jostins, Nature, 2012, PMID: 23128233
FCGR3A	L Jostins, Nature, 2012, PMID: 23128233
REL	L Jostins, Nature, 2012, PMID: 23128233
STAT1	L Jostins, Nature, 2012, PMID: 23128233
STAT4	L Jostins, Nature, 2012, PMID: 23128233
MST1	L Jostins, Nature, 2012, PMID: 23128233
PFKB4	L Jostins, Nature, 2012, PMID: 23128233
IL2	L Jostins, Nature, 2012, PMID: 23128233
IL21	L Jostins, Nature, 2012, PMID: 23128233
DAP	L Jostins, Nature, 2012, PMID: 23128233
IRGM	L Jostins, Nature, 2012, PMID: 23128233
IL12B	L Jostins, Nature, 2012, PMID: 23128233
DOK3	L Jostins, Nature, 2012, PMID: 23128233
CREM	L Jostins, Nature, 2012, PMID: 23128233
TRAF3IP2	L Jostins, Nature, 2012, PMID: 23128233
TNNI2	L Jostins, Nature, 2012, PMID: 23128233
LSP1	L Jostins, Nature, 2012, PMID: 23128233
CD6	L Jostins, Nature, 2012, PMID: 23128233
CCDC88B	L Jostins, Nature, 2012, PMID: 23128233
IFNG	L Jostins, Nature, 2012, PMID: 23128233
FOS	L Jostins, Nature, 2012, PMID: 23128233
MLH3	L Jostins, Nature, 2012, PMID: 23128233
GPR65	L Jostins, Nature, 2012, PMID: 23128233
GALC	L Jostins, Nature, 2012, PMID: 23128233
SOCS1	L Jostins, Nature, 2012, PMID: 23128233
LITAF	L Jostins, Nature, 2012, PMID: 23128233
PRKCB	L Jostins, Nature, 2012, PMID: 23128233
CCL13	L Jostins, Nature, 2012, PMID: 23128233
CCL2	L Jostins, Nature, 2012, PMID: 23128233
STAT3	L Jostins, Nature, 2012, PMID: 23128233
CD226	L Jostins, Nature, 2012, PMID: 23128233
TYK2	L Jostins, Nature, 2012, PMID: 23128233
CCR6	L Jostins, Nature, 2012, PMID: 23128233
RPS6KA2	L Jostins, Nature, 2012, PMID: 23128233
EPO	L Jostins, Nature, 2012, PMID: 23128233
IL15RA	L Jostins, Nature, 2012, PMID: 23128233
MAP3K8	L Jostins, Nature, 2012, PMID: 23128233
CD40	L Jostins, Nature, 2012, PMID: 23128233
LIF	L Jostins, Nature, 2012, PMID: 23128233
OSM	L Jostins, Nature, 2012, PMID: 23128233
TNFRSF18	L Jostins, Nature, 2012, PMID: 23128233
TNFRSF4	L Jostins, Nature, 2012, PMID: 23128233
TNFRSF9	L Jostins, Nature, 2012, PMID: 23128233
C1orf53	L Jostins, Nature, 2012, PMID: 23128233
RORC	L Jostins, Nature, 2012, PMID: 23128233
KIF21B	L Jostins, Nature, 2012, PMID: 23128233
IL10	L Jostins, Nature, 2012, PMID: 23128233
ADCY3	L Jostins, Nature, 2012, PMID: 23128233
FOSL2	L Jostins, Nature, 2012, PMID: 23128233
BRE	L Jostins, Nature, 2012, PMID: 23128233
SPRED2	L Jostins, Nature, 2012, PMID: 23128233
IL18RAP	L Jostins, Nature, 2012, PMID: 23128233
IL1R1	L Jostins, Nature, 2012, PMID: 23128233
PTGER4	L Jostins, Nature, 2012, PMID: 23128233
ERAP2	L Jostins, Nature, 2012, PMID: 23128233
ERAP1	L Jostins, Nature, 2012, PMID: 23128233
IBD5	L Jostins, Nature, 2012, PMID: 23128233
SPRY4	L Jostins, Nature, 2012, PMID: 23128233
NDFIP1	L Jostins, Nature, 2012, PMID: 23128233
TNFAIP3	L Jostins, Nature, 2012, PMID: 23128233
CISD1	L Jostins, Nature, 2012, PMID: 23128233
IPMK	L Jostins, Nature, 2012, PMID: 23128233
TSPAN14	L Jostins, Nature, 2012, PMID: 23128233
C10orf58	L Jostins, Nature, 2012, PMID: 23128233
CNTF	L Jostins, Nature, 2012, PMID: 23128233
LPXN	L Jostins, Nature, 2012, PMID: 23128233
RELA	L Jostins, Nature, 2012, PMID: 23128233
CXCR5	L Jostins, Nature, 2012, PMID: 23128233
LOH12CR1	L Jostins, Nature, 2012, PMID: 23128233
MUC19	L Jostins, Nature, 2012, PMID: 23128233
VDR	L Jostins, Nature, 2012, PMID: 23128233
GPR183	L Jostins, Nature, 2012, PMID: 23128233
GPR18	L Jostins, Nature, 2012, PMID: 23128233
ZFP36L1	L Jostins, Nature, 2012, PMID: 23128233
CRTC3	L Jostins, Nature, 2012, PMID: 23128233
IL27	L Jostins, Nature, 2012, PMID: 23128233
IRF8	L Jostins, Nature, 2012, PMID: 23128233
ORMDL3	L Jostins, Nature, 2012, PMID: 23128233
TUBD1	L Jostins, Nature, 2012, PMID: 23128233
RPS6KB1	L Jostins, Nature, 2012, PMID: 23128233
SMAD7	L Jostins, Nature, 2012, PMID: 23128233
PHACTR2	L Jostins, Nature, 2012, PMID: 23128233
ZPBP	L Jostins, Nature, 2012, PMID: 23128233
SMURF1	L Jostins, Nature, 2012, PMID: 23128233
TRIB1	L Jostins, Nature, 2012, PMID: 23128233
NFIL3	L Jostins, Nature, 2012, PMID: 23128233
TNFSF15	L Jostins, Nature, 2012, PMID: 23128233
CEBPG	L Jostins, Nature, 2012, PMID: 23128233
HCK	L Jostins, Nature, 2012, PMID: 23128233
DNMT3B	L Jostins, Nature, 2012, PMID: 23128233
CEBPB	L Jostins, Nature, 2012, PMID: 23128233
ZNF831	L Jostins, Nature, 2012, PMID: 23128233
CTSZ	L Jostins, Nature, 2012, PMID: 23128233
TNFRSF6B	L Jostins, Nature, 2012, PMID: 23128233
ICOSLG	L Jostins, Nature, 2012, PMID: 23128233
TAB1	L Jostins, Nature, 2012, PMID: 23128233
PTPN22	L Jostins, Nature, 2012, PMID: 23128233
ADAM30	L Jostins, Nature, 2012, PMID: 23128233
FASLG	L Jostins, Nature, 2012, PMID: 23128233
TNFSF18	L Jostins, Nature, 2012, PMID: 23128233
UCN	L Jostins, Nature, 2012, PMID: 23128233
SP140	L Jostins, Nature, 2012, PMID: 23128233
ATG16L1	L Jostins, Nature, 2012, PMID: 23128233
IL6ST	L Jostins, Nature, 2012, PMID: 23128233
IL31RA	L Jostins, Nature, 2012, PMID: 23128233
CPEB4	L Jostins, Nature, 2012, PMID: 23128233
TAGAP	L Jostins, Nature, 2012, PMID: 23128233
CREB5	L Jostins, Nature, 2012, PMID: 23128233
JAZF1	L Jostins, Nature, 2012, PMID: 23128233
RIPK2	L Jostins, Nature, 2012, PMID: 23128233
LACC1	L Jostins, Nature, 2012, PMID: 23128233
RASGRP1	L Jostins, Nature, 2012, PMID: 23128233
SPRED1	L Jostins, Nature, 2012, PMID: 23128233
LGALS9	L Jostins, Nature, 2012, PMID: 23128233
NOS2	L Jostins, Nature, 2012, PMID: 23128233
GPX4	L Jostins, Nature, 2012, PMID: 23128233
HMHA1	L Jostins, Nature, 2012, PMID: 23128233
FUT2	L Jostins, Nature, 2012, PMID: 23128233
IFNGR2	L Jostins, Nature, 2012, PMID: 23128233
IFNAR1	L Jostins, Nature, 2012, PMID: 23128233
TNFRSF14	L Jostins, Nature, 2012, PMID: 23128233
RFTN2	L Jostins, Nature, 2012, PMID: 23128233
PLCL1	L Jostins, Nature, 2012, PMID: 23128233
PRKCD	L Jostins, Nature, 2012, PMID: 23128233
ITIH4	L Jostins, Nature, 2012, PMID: 23128233
NFKB1	L Jostins, Nature, 2012, PMID: 23128233
MANBA	L Jostins, Nature, 2012, PMID: 23128233
SLC9A3	L Jostins, Nature, 2012, PMID: 23128233
CARD11	L Jostins, Nature, 2012, PMID: 23128233
GNA12	L Jostins, Nature, 2012, PMID: 23128233
DLD	L Jostins, Nature, 2012, PMID: 23128233
IRF5	L Jostins, Nature, 2012, PMID: 23128233
JRKL	L Jostins, Nature, 2012, PMID: 23128233
MAML2	L Jostins, Nature, 2012, PMID: 23128233
NXPE1	L Jostins, Nature, 2012, PMID: 23128233
NXPE4	L Jostins, Nature, 2012, PMID: 23128233
ITGAL	L Jostins, Nature, 2012, PMID: 23128233
ZFP90	L Jostins, Nature, 2012, PMID: 23128233
CALM3	L Jostins, Nature, 2012, PMID: 23128233
ADA	L Jostins, Nature, 2012, PMID: 23128233

## Sheet: Supplementary Table 6
Supplementary Table 6. Summary of top candidate IBD genes from each pathway and functional enrichment analyses
Gene	InnateDB.GO	InnateDB.pathway	IPA	NETanalyst	HGC	All	Rank
TLR4	4.1547	5.13776	6.85228	-0.204626	3.18251	19.1226	1
NOD2	4.23963	6.81673	0.722524	4.12662	1.10676	17.0123	2
ICAM1	2.52414	2.85769	3.49449	1.961	4.07212	14.9094	3
INPP5D	1.23328	4.32937	1.1226	4.12662	3.18251	13.9944	4
VDR	2.88932	-0.0442306	0.279582	6.29224	1.69983	11.1167	5
LRRK2	1.58997	-0.210054	-0.220515	6.29224	1.10676	8.5584	6
IL33	1.83625	-0.210054	7.3238	-0.204626	-0.375924	8.36945	7
ITK	1.25027	4.59884	0.193851	-0.204626	2.2929	8.13123	8
NR2C1	1.67489	-0.210054	-0.220515	1.961	1.69983	4.90515	9
NMS	-0.983257	-0.210054	-0.220515	-0.204626	5.85134	4.23288	10
EGR2	1.8957	0.163049	-0.220515	-0.204626	2.2929	3.92651	11
CHD9	0.953032	-0.210054	-0.220515	-0.204626	3.47905	3.79688	12
ADORA1	1.47957	-0.210054	0.893986	-0.204626	1.10676	3.06563	13
EHMT1	1.07193	-0.0649585	-0.220515	-0.204626	2.2929	2.87473	14
KCNIP3	2.07404	0.183777	-0.220515	-0.204626	0.217149	2.04983	15
NTSR1	0.358557	-0.210054	0.893986	-0.204626	1.10676	1.94462	16
PDGFD	-0.881347	-0.0442306	2.02278	-0.204626	-0.375924	0.516649	17
ZFAND4	-0.0830526	-0.210054	-0.220515	-0.204626	1.10676	0.388509	18
RLF	1.33519	-0.210054	-0.220515	-0.204626	-0.375924	0.324075	19
MIER1	1.30972	-0.210054	-0.220515	-0.204626	-0.375924	0.298598	20
NUMA1	0.511422	-0.0442306	-0.220515	-0.204626	0.217149	0.259199	21
MED13	0.0867973	-0.106414	-0.0347649	-0.204626	0.513685	0.254677	22
DLG4	0.961524	-0.210054	-0.00618792	-0.204626	-0.375924	0.164733	23
MYNN	1.15685	-0.210054	-0.220515	-0.204626	-0.375924	0.145733	24
SSH1	1.13137	-0.210054	-0.220515	-0.204626	-0.375924	0.120255	25
RAD54L	0.834137	-0.210054	-0.220515	-0.204626	-0.375924	-0.176982	26
RAB32	0.834137	-0.210054	-0.220515	-0.204626	-0.375924	-0.176982	27
RGS1	0.0952898	-0.210054	-0.0776303	-0.204626	0.217149	-0.179872	28
CCT7	-0.0830526	-0.210054	-0.220515	-0.204626	0.513685	-0.204563	29
CLIP3	0.460467	-0.210054	-0.220515	-0.204626	-0.0793876	-0.254116	30
TELO2	0.451975	-0.210054	-0.220515	-0.204626	-0.0793876	-0.262608	31
PPP1R3D	-0.0830526	-0.210054	0.565351	-0.204626	-0.375924	-0.308305	32
USP37	0.562377	-0.210054	-0.220515	-0.204626	-0.375924	-0.448742	33
NANOS2	0.485945	-0.210054	-0.220515	-0.204626	-0.375924	-0.525174	34
ANKRD6	0.485945	-0.210054	-0.220515	-0.204626	-0.375924	-0.525174	35
TOE1	0.451975	-0.210054	-0.220515	-0.204626	-0.375924	-0.559144	36
DARS2	0.451975	-0.210054	-0.220515	-0.204626	-0.375924	-0.559144	37
RRS1	0.451975	-0.210054	-0.220515	-0.204626	-0.375924	-0.559144	38
TUT1	0.451975	-0.210054	-0.220515	-0.204626	-0.375924	-0.559144	39
GGNBP2	0.451975	-0.210054	-0.220515	-0.204626	-0.375924	-0.559144	40
HAUS2	-0.44823	-0.210054	-0.220515	-0.204626	0.513685	-0.56974	41
IRX1	0.43499	-0.210054	-0.220515	-0.204626	-0.375924	-0.576129	42
LBX2	0.43499	-0.210054	-0.220515	-0.204626	-0.375924	-0.576129	43
HSD17B8	0.358557	-0.210054	-0.149073	-0.204626	-0.375924	-0.581119	44
GJD2	0.358557	-0.210054	-0.220515	-0.204626	-0.375924	-0.652562	45
NECAP1	0.358557	-0.210054	-0.220515	-0.204626	-0.375924	-0.652562	46
FRMPD1	0.358557	-0.210054	-0.220515	-0.204626	-0.375924	-0.652562	47
GALNT8	0.358557	-0.210054	-0.220515	-0.204626	-0.375924	-0.652562	48
FCHO2	0.358557	-0.210054	-0.220515	-0.204626	-0.375924	-0.652562	49
OPTC	-0.0490826	-0.210054	-0.220515	-0.204626	-0.0793876	-0.763665	50
SPAG5	-0.0830526	-0.210054	-0.220515	-0.204626	-0.0793876	-0.797635	51
CLPX	0.171722	-0.210054	-0.220515	-0.204626	-0.375924	-0.839397	52
THAP3	0.154737	-0.210054	-0.220515	-0.204626	-0.375924	-0.856382	53
LBR	0.154737	-0.210054	-0.220515	-0.204626	-0.375924	-0.856382	54
TFCP2	0.0188574	-0.0856865	-0.220515	-0.204626	-0.375924	-0.867894	55
PEX13	-0.0745601	-0.210054	-0.0490534	-0.204626	-0.375924	-0.914217	56
DAB1	0.0867973	-0.210054	-0.220515	-0.204626	-0.375924	-0.924322	57
ZNF329	0.0273498	-0.210054	-0.220515	-0.204626	-0.375924	-0.983769	58
ZNF556	0.0273498	-0.210054	-0.220515	-0.204626	-0.375924	-0.983769	59
ZNF597	0.0273498	-0.210054	-0.220515	-0.204626	-0.375924	-0.983769	60
ZNF552	0.0273498	-0.210054	-0.220515	-0.204626	-0.375924	-0.983769	61
ZNF785	0.0273498	-0.210054	-0.220515	-0.204626	-0.375924	-0.983769	62
HHLA2	0.0103649	-0.210054	-0.220515	-0.204626	-0.375924	-1.00075	63
PLSCR2	-0.00662014	-0.210054	-0.220515	-0.204626	-0.375924	-1.01774	64
ATP6V0D2	-0.0830526	-0.210054	-0.149073	-0.204626	-0.375924	-1.02273	65
EVPLL	-0.0151126	-0.210054	-0.220515	-0.204626	-0.375924	-1.02623	66
PCOLCE2	-0.0660676	-0.210054	-0.220515	-0.204626	-0.375924	-1.07719	67
RNF39	-0.0830526	-0.210054	-0.220515	-0.204626	-0.375924	-1.09417	68
DPH2	-0.0830526	-0.210054	-0.220515	-0.204626	-0.375924	-1.09417	69
SH2D5	-0.0830526	-0.210054	-0.220515	-0.204626	-0.375924	-1.09417	70
IGSF3	-0.0830526	-0.210054	-0.220515	-0.204626	-0.375924	-1.09417	71
INTS7	-0.0830526	-0.210054	-0.220515	-0.204626	-0.375924	-1.09417	72
SUSD1	-0.0830526	-0.210054	-0.220515	-0.204626	-0.375924	-1.09417	73
SPHKAP	-0.0830526	-0.210054	-0.220515	-0.204626	-0.375924	-1.09417	74
DPP10	-0.0830526	-0.210054	-0.220515	-0.204626	-0.375924	-1.09417	75
ANXA6	-0.0830526	-0.210054	-0.220515	-0.204626	-0.375924	-1.09417	76
PLTP	-0.252903	-0.210054	-0.106207	-0.204626	-0.375924	-1.14971	77
ZNF695	-0.21044	-0.210054	-0.220515	-0.204626	-0.375924	-1.22156	78
DAGLA	-0.541647	0.0386813	-0.220515	-0.204626	-0.375924	-1.30403	79
KIF25	-0.983257	-0.210054	-0.220515	-0.204626	0.217149	-1.4013	80
ANP32B	-0.397275	-0.210054	-0.220515	-0.204626	-0.375924	-1.40839	81
C2orf16	-0.44823	-0.210054	-0.220515	-0.204626	-0.375924	-1.45935	82
OGFOD1	-0.44823	-0.210054	-0.220515	-0.204626	-0.375924	-1.45935	83
NOL6	-0.44823	-0.210054	-0.220515	-0.204626	-0.375924	-1.45935	84
OR6C6	-0.541647	-0.210054	-0.220515	-0.204626	-0.375924	-1.55277	85
OR6C76	-0.541647	-0.210054	-0.220515	-0.204626	-0.375924	-1.55277	86
MCOLN2	-0.541647	-0.210054	-0.220515	-0.204626	-0.375924	-1.55277	87
ASIC5	-0.541647	-0.210054	-0.220515	-0.204626	-0.375924	-1.55277	88
OR10J5	-0.541647	-0.210054	-0.220515	-0.204626	-0.375924	-1.55277	89
EPHX2	-0.575617	-0.210054	-0.220515	-0.204626	-0.375924	-1.58674	90
PTCHD4	-0.601095	-0.210054	-0.220515	-0.204626	-0.375924	-1.61221	91
RP4-576H24.4	-0.983257	-0.210054	-0.220515	-0.204626	-0.0793876	-1.69784	92
ZMIZ1	-0.745467	-0.210054	-0.220515	-0.204626	-0.375924	-1.75659	93
CST4	-0.762452	-0.210054	-0.220515	-0.204626	-0.375924	-1.77357	94
GSS	-0.78793	-0.210054	-0.220515	-0.204626	-0.375924	-1.79905	95
GPD2	-0.966272	-0.210054	-0.0776303	-0.204626	-0.375924	-1.83451	96
P4HTM	-0.983257	-0.210054	-0.120496	-0.204626	-0.375924	-1.89436	97
LAMP3	-0.915317	-0.210054	-0.220515	-0.204626	-0.375924	-1.92644	98
GK2	-0.966272	-0.210054	-0.220515	-0.204626	-0.375924	-1.97739	99
2022-03-07	-0.983257	-0.210054	-0.220515	-0.204626	-0.375924	-1.99438	100
WDR60	-0.983257	-0.210054	-0.220515	-0.204626	-0.375924	-1.99438	101
EDRF1	-0.983257	-0.210054	-0.220515	-0.204626	-0.375924	-1.99438	102
ERICH1	-0.983257	-0.210054	-0.220515	-0.204626	-0.375924	-1.99438	103
CLRN3	-0.983257	-0.210054	-0.220515	-0.204626	-0.375924	-1.99438	104
CCDC15	-0.983257	-0.210054	-0.220515	-0.204626	-0.375924	-1.99438	105
SLC45A4	-0.983257	-0.210054	-0.220515	-0.204626	-0.375924	-1.99438	106
C14orf166B	-0.983257	-0.210054	-0.220515	-0.204626	-0.375924	-1.99438	107
ERO1LB	-0.983257	-0.210054	-0.220515	-0.204626	-0.375924	-1.99438	108
C2orf70	-0.983257	-0.210054	-0.220515	-0.204626	-0.375924	-1.99438	109
C10orf91	-0.983257	-0.210054	-0.220515	-0.204626	-0.375924	-1.99438	110
PRSS36	-0.983257	-0.210054	-0.220515	-0.204626	-0.375924	-1.99438	111
SUSD5	-0.983257	-0.210054	-0.220515	-0.204626	-0.375924	-1.99438	112
SLC35F1	-0.983257	-0.210054	-0.220515	-0.204626	-0.375924	-1.99438	113
SCFD2	-0.983257	-0.210054	-0.220515	-0.204626	-0.375924	-1.99438	114
SRRD	-0.983257	-0.210054	-0.220515	-0.204626	-0.375924	-1.99438	115
KIAA1468	-0.983257	-0.210054	-0.220515	-0.204626	-0.375924	-1.99438	116
VCPKMT	-0.983257	-0.210054	-0.220515	-0.204626	-0.375924	-1.99438	117
LRRC56	-0.983257	-0.210054	-0.220515	-0.204626	-0.375924	-1.99438	118
RPUSD1	-0.983257	-0.210054	-0.220515	-0.204626	-0.375924	-1.99438	119
MRPL16	-0.983257	-0.210054	-0.220515	-0.204626	-0.375924	-1.99438	120
C6orf58	-0.983257	-0.210054	-0.220515	-0.204626	-0.375924	-1.99438	121
GET4	-0.983257	-0.210054	-0.220515	-0.204626	-0.375924	-1.99438	122
PLEKHA6	-0.983257	-0.210054	-0.220515	-0.204626	-0.375924	-1.99438	123
KTI12	-0.983257	-0.210054	-0.220515	-0.204626	-0.375924	-1.99438	124
C9orf9	-0.983257	-0.210054	-0.220515	-0.204626	-0.375924	-1.99438	125
MFI2	-0.983257	-0.210054	-0.220515	-0.204626	-0.375924	-1.99438	126
CDKAL1	-0.983257	-0.210054	-0.220515	-0.204626	-0.375924	-1.99438	127

## Sheet: Supplementary Table 7
Supplementary Table 7. Gene prioritization by counting shared IBD genes in pathways and gene modules
ToppGene	GIANT	HGC	IPA
TLR4	CDKAL1	NOD2	ADORA1
ICAM1	EGR2	LRRK2	ANKRD6
DLG4	EPHX2	INPP5D	ANXA6
ITK	IL33	EHMT1	ASIC5
NOD2	ITK	NMS	ATP6V0D2
LRRK2	LAMP3	TOE1	C2orf16
VDR	LRRK2	SSH1	CCDC15
INPP5D	MCOLN2	HAUS2	CCT7
EGR2	NOD2	NTSR1	CDKAL1
EHMT1	PCOLCE2	MED13	CHD9
ADORA1	PLTP	ICAM1	CLIP3
ZNF329	PRSS36	NUMA1	CLPX
KCNIP3	RAB32	PPP1R3D	CLRN3
NTSR1	RGS1	ITK	CST4
NR2C1	SUSD5	ADORA1	DAB1
IL33	TLR4	TLR4	DAGLA
NUMA1	WDR60	PDGFD	DARS2
RGS1	ZNF329	RGS1	DLG4
LBR	ICAM1	NR2C1	DPP10
CST4	INPP5D	EGR2	EDRF1
PDGFD	PDGFD	VDR	EGR2
TFCP2	VDR	KCNIP3	EHMT1
ANXA6		CHD9	EPHX2
IRX1		IL33	ERICH1
ATP6V0D2			FAM166C
PLSCR2			FCHO2
ZMIZ1			FRMPD1
LAMP3			GALNT8
HHLA2			GET4
DAB1			GJD2
GSS			GK2
DAGLA			GPD2
ZNF695			GSS
TELO2			HHLA2
CDKAL1			ICAM1
ANP32B			IGSF3
P4HTM			IL33
CLIP3			INPP5D
GGNBP2			INTS7
MIER1			IRX1
MED13			ITK
MCOLN2			LBR
PLTP			LBX2
			LRRC56
			LRRC74A
			LRRK2
			MCOLN2
			MED13
			MELTF
			MIER1
			MRPL16
			MYNN
			NANOS2
			NMS
			NOD2
			NOL6
			NR2C1
			NTSR1
			NUMA1
			OGFOD1
			OPTC
			OR10J5
			OR6C6
			OR6C76
			P4HTM
			PCOLCE2
			PDGFD
			PEX13
			PLEKHA6
			PLTP
			PPP1R3D
			PRSS36
			PTCHD4
			RAB32
			RAD54L
			RELCH
			RGS1
			RLF
			RPUSD1
			RRS1
			SCFD2
			SH2D5
			SLC35F1
			SLC45A4
			SPACA9
			SPAG5
			SPHKAP
			SRRD
			SSH1
			SUSD1
			TELO2
			TFCP2
			THAP3
			TLR4
			TUT1
			USP37
			VDR
			ZFAND4
			ZMIZ1
			ZNF552
			ZNF556
			ZNF597
			ZNF695
			ZNF785

## Sheet: Supplementary Table 8
Supplementary Table 8. LD information between ICAM1 top variant and 3 IBD-associated variants in TYK2 result from Joint analysis
		LD martrix result from GCTA
	RSID	SNP	19:10395877:C:T	19:10463118:G:C	19:10464843:G:A	19:10469975:A:C
ICAM site	rs142682313	19:10395877:C:T	1	0.00387496	-0.00818943	-0.0374023
TYK2 site 1	rs34536443	19:10463118:G:C	0.00387496	1	-0.00206159	-0.0770559
TYK2 site 2	rs35018800	19:10464843:G:A	-0.00818943	-0.00206159	1	-0.0137362
TYK2 site 3	rs12720356	19:10469975:A:C	-0.0374023	-0.0770559	-0.0137362	1

## Sheet: Supplementary Table 9
Supplementary Table 9. Joint association analysis and conditional analysis for ICAM1 top variant on three TYK2 variants.
Supplementary Table 9.A. Conditional analysis on three TYK2 variants for rs142682313
Conditional analysis for ICAM1 lead variant rs142682313		Beta (b) and P-value (p) before conditioning		Beta and P-value after conditioning
Sites conditioning on	RSID for TYK2 sites	Beta	P-value	Beta-C	P-value-C
TYK2 site 1	rs34536443	-0.183976	0.000376703	-0.183777	0.000388425
TYK2 site 2	rs35018800	-0.183976	0.000376703	-0.183822	0.000387135
TYK2 site 3	rs12720356	-0.183976	0.000376703	-0.177359	0.000617222
Supplementary Table 9.B. Joint association analysis for ICAM1 lead variants and 3 TYK2 variants
Chr	SNP	RS ID	Gene	Bp	Effect Allele	Frequency of the effect allele	Effect size (Original)	Standard error (Original)	P value (Original)	Effect size (Joint analysis)	Standard error (Joint analysis)	P value (Joint analysis)
19	19:10395877:C:T	rs142682313	ICAM1	10395877	T	0.00900263	-0.183976	0.0517384	0.000376703	-0.1774	0.0518381	0.000621192
19	19:10463118:G:C	rs34536443	TYK2	10463118	C	0.0319583	-0.0278719	0.0279725	0.319054	-0.0205447	0.028055	0.463986
19	19:10464843:G:A	rs35018800	TYK2	10464843	A	0.00182002	0.0415409	0.114214	0.716074	0.043238	0.114219	0.705021
19	19:10469975:A:C	rs12720356	TYK2	10469975	C	0.104441	0.0546356	0.015974	0.00062556	0.0517712	0.0160513	0.00125813

## Sheet: Supplementary Table 10
Supplementary Table 10. Variants observed in LD within the 1000kb of the INPP5D variant rs574989226
CHR_A	BP_A	SNP_A	RSID_B	CHR_B	BP_B	SNP_B	RSID_B	R2	Gene_B
2	233990635	2:233990635:TC:T	rs574989226	2	233990531	2:233990531:G:A	rs374974999	1.89206e-06	INPP5D
2	233990635	2:233990635:TC:T	rs574989226	2	233990556	2:233990556:C:T	rs368153152	1.89415e-06	INPP5D
2	233990635	2:233990635:TC:T	rs574989226	2	233990592	2:233990592:A:C	rs181242219	1.51489e-05	INPP5D
2	233990635	2:233990635:TC:T	rs574989226	2	233990594	2:233990594:A:G	rs61752227	0.000232101	INPP5D
2	233990635	2:233990635:TC:T	rs574989226	2	233990635	2:233990635:TC:T	rs574989226	1	INPP5D
2	233990635	2:233990635:TC:T	rs574989226	2	233995212	2:233995212:C:T	#N/A	1.90672e-06	INPP5D
2	233990635	2:233990635:TC:T	rs574989226	2	234070429	2:234070429:G:A	rs376324528	1.89311e-06	INPP5D

[truncated: 8 more sheets: Supplementary Table 11, Supplementary Table 12, Supplementary Table 13, Supplementary Table 14, Supplementary Table  15, Supplementary Table 16, Supplementary Table 17, Supplementary Table 18]
